# Supplementary material for: Inheritance of paternal DNA damage by histone-mediated repair restriction
Source: Nature. 2022 Dec 21;613(7943):365–74. doi: 10.1038/s41586-022-05544-w (PMC9834056; doi:10.1038/s41586-022-05544-w)
Supplement: Supplementary file 3 — Number of the new translocations in the F1 offspring per sample. [file 41586_2022_5544_MOESM3_ESM.xlsx]

## Sheet: fog2_Translocation_per_F1_sampl
Number of fog-2 Translocations per F1 sample
Strain	Treated	Sex	Type	File_ID	Mapped_Reads	Zygosity	Number of new F1 translocations	Parent	Name
fog-2	treated	female	Translocation	144288	66364619	Heterozygous	9	1	fog-2_female
fog-2	treated	female	Translocation	144290	41256400	Heterozygous	17	1	fog-2_female
fog-2	treated	female	Translocation	144292	49056347	Heterozygous	21	1	fog-2_female
fog-2	treated	female	Translocation	144294	16685762	Heterozygous	4	2	fog-2_female
fog-2	treated	female	Translocation	144298	28468278	Heterozygous	4	2	fog-2_female
fog-2	treated	female	Translocation	144302	10607010	Heterozygous	3	3	fog-2_female
fog-2	treated	male	Translocation	144304	46118844	Heterozygous	2	1	fog-2_male
fog-2	treated	male	Translocation	144306	42136281	Heterozygous	6	1	fog-2_male
fog-2	treated	male	Translocation	144308	50668267	Heterozygous	21	1	fog-2_male
fog-2	treated	male	Translocation	144310	43680121	Heterozygous	14	2	fog-2_male
fog-2	treated	male	Translocation	144312	30932827	Heterozygous	15	2	fog-2_male
fog-2	treated	male	Translocation	144314	53401420	Heterozygous	28	2	fog-2_male
fog-2	treated	male	Translocation	144316	40113588	Heterozygous	3	3	fog-2_male
fog-2	treated	male	Translocation	144318	51931777	Heterozygous	7	3	fog-2_male

## Sheet: WT_Translocation_per_F1_sample
Number of WT Translocations per F1 sample
Strain	Treated	Sex	Type	File_ID	Mapped_Reads	Zygosity	Number of new F1 translocations	Parent	Name
N2	treated	hermaphrodite	Translocation	144264	48242152	Heterozygous	34	1	N2_hermaphrodite
N2	treated	hermaphrodite	Translocation	144266	33293755	Heterozygous	24	1	N2_hermaphrodite
N2	treated	hermaphrodite	Translocation	144268	46089852	Heterozygous	31	1	N2_hermaphrodite
N2	treated	hermaphrodite	Translocation	144270	43670099	Heterozygous	16	2	N2_hermaphrodite
N2	treated	hermaphrodite	Translocation	144272	30134119	Heterozygous	36	2	N2_hermaphrodite
N2	treated	hermaphrodite	Translocation	144274	44108590	Heterozygous	16	2	N2_hermaphrodite
N2	treated	hermaphrodite	Translocation	144276	36442358	Heterozygous	8	3	N2_hermaphrodite
N2	treated	hermaphrodite	Translocation	144278	32106864	Heterozygous	25	3	N2_hermaphrodite
N2	treated	hermaphrodite	Translocation	144282	48837918	Heterozygous	43	4	N2_hermaphrodite
N2	treated	hermaphrodite	Translocation	144284	52665405	Heterozygous	19	4	N2_hermaphrodite
N2	treated	hermaphrodite	Translocation	144286	23509432	Heterozygous	19	4	N2_hermaphrodite
