# Supplementary material for: Inheritance of paternal DNA damage by histone-mediated repair restriction
Source: Nature. 2022 Dec 21;613(7943):365–74. doi: 10.1038/s41586-022-05544-w (PMC9834056; doi:10.1038/s41586-022-05544-w)
Supplement: Supplementary file 4 — Complete list of called chromosomal structural variation sites before and after filtering with P0. [file 41586_2022_5544_MOESM4_ESM.xlsx]

## Sheet: Unfiltered_SV
File_ID	chr	pos	id	ref	alt	quality	filter	info	format	sample1	Type	Zygosity	Treatment	end_pos	end_chr	HOMLEN	Start_Pos_CI_Start	Start_Pos_CI_End	End_Pos_CI_Start	End_Pos_CI_End	Rep	Mapped_Reads	Translocation_Type	Translocation_with_Insert	Max_CI	BackgroundMutation	StartPos_Repeat	EndPos_Repeat
144205	I	238574	MantaBND:14:0:1:0:0:0:1	C	C]V:10866798]	65	PASS	SVTYPE=BND;MATEID=MantaBND:14:0:1:0:0:0:0;IMPRECISE;CIPOS=-182,183;BND_DEPTH=48;MATE_BND_DEPTH=102	GT:FT:GQ:PL:PR	0/1:PASS:65:115,0,590:40,12	Translocation	Heterozygous	P0_N2_control_hermaphrodite	10866798	V	0	-182	183	0	0	rep.1	53267041	2		183
144205	I	678691	MantaDEL:13:0:0:0:0:0	TCCATATGATCCGTCGAAGCTGAAGGATCAGAACATCAGGAGGTACCCATGTGATCATTCGGCTCTGAAAGATCAGATCATCAGGCAGAGCCTCATGTTCTTTTGGAGCTGAAGGATCAGAACATCAGGAAGAGCCTCATGATCCTTTGGATCTGAAGGATCAGACCATCAGGAGGTACCCTTACGATCCTTCTTATCTGAAAGATCAGATCATCAGAAGGTA	T	859	PASS	END=678913;SVTYPE=DEL;SVLEN=-222;CIGAR=1M222D;CIPOS=0,4;HOMLEN=4;HOMSEQ=CCAT	GT:FT:GQ:PL:PR:SR	0/1:PASS:560:909,0,557:13,4:43,25	Deletion	Heterozygous	P0_N2_control_hermaphrodite	678913	I	4	0	4	0	0	rep.1	53267041			4
144205	I	2652464	MantaINS:70:0:0:0:2:0	A	<INS>	999	PASS	END=2652464;SVTYPE=INS;CIPOS=0,4;CIEND=0,4;HOMLEN=4;HOMSEQ=GTGG;LEFT_SVINSSEQ=GTGGTAGAAAGGTGGCAAAAAGGTGAGAGGAAGGTGGCAAAAAGGTGTACAGAAGG;RIGHT_SVINSSEQ=CCCACCTTCTGTACACCTTTTTGCCACCTTCCTCTCACCTTTTTGCCACCTTTCTACCACCTTTTTGCCGCCTAGTTATGGCCATTTTTCGCCTTCCGGCAAAAAG	GT:FT:GQ:PL:PR:SR	1/1:PASS:71:999,74,0:0,2:0,24	Insertion	Homozygous	P0_N2_control_hermaphrodite	2652464	I	4	0	4	0	4	rep.1	53267041			4
144205	I	4548880	MantaBND:135:0:3:0:0:0:0	T	]IV:6470028]T	123	PASS	SVTYPE=BND;MATEID=MantaBND:135:0:3:0:0:0:1;IMPRECISE;CIPOS=-207,207;BND_DEPTH=82;MATE_BND_DEPTH=45	GT:FT:GQ:PL:PR	0/1:PASS:123:173,0,371:26,13	Translocation	Heterozygous	P0_N2_control_hermaphrodite	6470028	IV	0	-207	207	0	0	rep.1	53267041	3		207		(TTTTTA)n
144205	I	6521294	MantaINS:174:0:0:0:3:0	A	<INS>	999	PASS	END=6521294;SVTYPE=INS;CIPOS=0,5;CIEND=0,5;HOMLEN=5;HOMSEQ=GATCG;LEFT_SVINSSEQ=GATCGAAACAATTATTGGAAATGTATTAAATGAAATGAAATCAGAATTGCATTTAGGGGGTAGTAGTCGCATCTTTAGTCAGATTATTCAGATATAGTATGAAGT;RIGHT_SVINSSEQ=AATCAATTCTTTCAGACGTTTCTTGTGGAGTGGGCATCATTTATTTTGGCCAAAACGTTTTCTCACTCACACGAAAGAATAGGAACAAACTGTGCAAATCCAATAGATTCTTGTT	GT:FT:GQ:PL:PR:SR	1/1:PASS:136:999,139,0:0,2:0,60	Insertion	Homozygous	P0_N2_control_hermaphrodite	6521294	I	5	0	5	0	5	rep.1	53267041			5
144205	I	8054335	MantaBND:225:0:1:0:0:0:0	A	A[IV:8566417[	999	PASS	SVTYPE=BND;MATEID=MantaBND:225:0:1:0:0:0:1;CIPOS=0,37;HOMLEN=37;HOMSEQ=ACTCGGCATTTGGCTCTAGCTTCTTGCCCAAGTTTAG;BND_DEPTH=53;MATE_BND_DEPTH=91	GT:FT:GQ:PL:PR:SR	0/1:PASS:416:999,0,413:12,8:34,29	Translocation	Heterozygous	P0_N2_control_hermaphrodite	8566417	IV	37	0	37	0	0	rep.1	53267041	1		37
144205	I	8454802	MantaINS:242:0:0:0:5:0	T	<INS>	999	PASS	END=8454802;SVTYPE=INS;LEFT_SVINSSEQ=TAGGTGATTGGTAGGTTAGATATTACATATAGGGGGGGGGGGGGGCATTGACAGAATTCTCTTTTCGATTGGCGTCATTTTTTATGGGTAACTATAGTTGTAGATCCTCAAAATATAATAC;RIGHT_SVINSSEQ=TTACGGGAACGTCGCAAAGTCAAATAGTTGGCAAAGTGGAGAGACGGCAGACATGACGTGGCACCAACCAGCGAAAACACGCAAACGGCGATGATCCGGAAATGGCAGAAAAAAACGAC	GT:FT:GQ:PL:PR:SR	1/1:PASS:112:999,115,0:0,1:0,48	Insertion	Homozygous	P0_N2_control_hermaphrodite	8454802	I	0	0	0	0	0	rep.1	53267041			0
144205	I	8660497	MantaBND:247:0:0:1:0:0:1	C	C]I:8660595]	367	PASS	SVTYPE=BND;MATEID=MantaBND:247:0:0:1:0:0:0;IMPRECISE;CIPOS=-273,274;BND_DEPTH=94;MATE_BND_DEPTH=54	GT:FT:GQ:PL:PR	0/1:PASS:127:417,0,124:12,22	Translocation	Heterozygous	P0_N2_control_hermaphrodite	8660595	I	0	-273	274	0	0	rep.1	53267041	2		274		CELE14A
144205	I	8660595	MantaBND:247:0:0:1:0:0:0	T	T]I:8660497]	367	PASS	SVTYPE=BND;MATEID=MantaBND:247:0:0:1:0:0:1;IMPRECISE;CIPOS=-187,188;BND_DEPTH=54;MATE_BND_DEPTH=94	GT:FT:GQ:PL:PR	0/1:PASS:127:417,0,124:12,22	Translocation	Heterozygous	P0_N2_control_hermaphrodite	8660497	I	0	-187	188	0	0	rep.1	53267041	2		188
144205	I	11175582	MantaINS:310:0:0:0:3:0	C	<INS>	999	PASS	END=11175582;SVTYPE=INS;CIPOS=0,6;CIEND=0,6;HOMLEN=6;HOMSEQ=CTCGTG;LEFT_SVINSSEQ=CTCGTGGATTACACGAGCACTGCGTAAATCGACACATGACTAATATTGGGCTTTTCCAATTTAAATCGACTATTTTAAGCTAAAAGTTGCTTGATTTTTAAGAAAAAAAAAGAAGAATTTATGTTAAAAACTACAAATGACCGAATATCATGAAAAAAATTTAAAAAAATATTCTAGATTTTATAT;RIGHT_SVINSSEQ=CTACCGAACGAATCAATTGGCGGAATTTCAAATGTAATTAGATGAAAACTGAGATTTTTCCAATTTTCAAAAAATCATATAAAATCTAGAATATTTTTTCGAACATTTTTATCATG…	GT:FT:GQ:PL:PR:SR	1/1:PASS:80:999,83,0:0,2:0,26	Insertion	Homozygous	P0_N2_control_hermaphrodite	11175582	I	6	0	6	0	6	rep.1	53267041			6
144205	I	11511648	MantaBND:71:2:5:1:0:0:0	G	]IV:17326045]TG	699	PASS	SVTYPE=BND;MATEID=MantaBND:71:2:5:1:0:0:1;SVINSLEN=1;SVINSSEQ=T;BND_DEPTH=41;MATE_BND_DEPTH=104	GT:FT:GQ:PL:PR:SR	0/1:PASS:221:749,0,218:6,4:20,17	Translocation	Heterozygous	P0_N2_control_hermaphrodite	17326045	IV	0	0	0	0	0	rep.1	53267041	3	T	0		CELE46A	PALTTAA3_CE
144205	I	11511671	MantaBND:71:2:5:0:0:0:1	G	G]IV:17326109]	33	PASS	SVTYPE=BND;MATEID=MantaBND:71:2:5:0:0:0:0;IMPRECISE;CIPOS=-157,157;BND_DEPTH=41;MATE_BND_DEPTH=33	GT:FT:GQ:PL:PR	0/1:PASS:33:83,0,182:13,7	Translocation	Heterozygous	P0_N2_control_hermaphrodite	17326109	IV	0	-157	157	0	0	rep.1	53267041	2		157		HAT3_CE	PALTTAA3_CE
144205	I	11630191	MantaBND:317:0:1:0:0:0:0	G	G]V:2701131]	63	PASS	SVTYPE=BND;MATEID=MantaBND:317:0:1:0:0:0:1;IMPRECISE;CIPOS=-222,222;BND_DEPTH=39;MATE_BND_DEPTH=38	GT:FT:GQ:PL:PR	0/1:PASS:63:113,0,447:31,15	Translocation	Heterozygous	P0_N2_control_hermaphrodite	2701131	V	0	-222	222	0	0	rep.1	53267041	2		222			HAT1_CE
144205	I	14279597	MantaINS:380:0:0:0:2:0	T	<INS>	999	PASS	END=14279597;SVTYPE=INS;CIPOS=0,7;CIEND=0,7;HOMLEN=7;HOMSEQ=AAGGATC;LEFT_SVINSSEQ=AAGGATCTATTCCTAAATACCTATGACGTATTTAGGAATAGATCCTTAGGAATTCACGAACAGGTTTTTAGTAGTTTCTAGTCTTAAAGGGACATGGTGCATCGGTGGGAACCTTTGACACCGTGGCGTAGTTCTTAAGTTTATAGTTTGTAGTTTTTGGTACAAGAAACCCCCATGTTAACGTGGTAAGCTACTGTAAATTTGTAATTTCGTAGTCTTAAAGGGACATGGTGCATTGATGGAAACCTTTGACGCCGTGGTGT;RIGHT_SVINSSEQ=AGTTTGTAGTCTTTGAGGAACATGGTGCATCGACGGGA…	GT:FT:GQ:PL:PR:SR	1/1:PASS:151:999,154,0:0,1:0,64	Insertion	Homozygous	P0_N2_control_hermaphrodite	14279597	I	7	0	7	0	7	rep.1	53267041			7
144205	I	14340151	MantaBND:388:0:1:0:0:0:1	C	[V:4248555[C	981	PASS	SVTYPE=BND;MATEID=MantaBND:388:0:1:0:0:0:0;CIPOS=0,1;HOMLEN=1;HOMSEQ=G;BND_DEPTH=44;MATE_BND_DEPTH=42	GT:FT:GQ:PL:PR:SR	0/1:PASS:16:999,0,13:3,3:6,26	Translocation	Heterozygous	P0_N2_control_hermaphrodite	4248555	V	1	0	1	0	0	rep.1	53267041	4		1
144205	I	14425428	MantaDEL:392:0:1:0:0:0	CAGCAATTTTGCCTAATTTAGACTACAAACTACAGTTATTTGCAATTTGGCACAGTCTGTCTTGATTACTATAATGCAGTAGCAGTAGTCGAAATTTCAAAAAAAATCGCCAAATTCGAATTCAATTTTCTGAGAAAATTCTAATTTTCCTGTTAGATATGTTTTGGGCTCTGCTGATCTGTTGGAAAATGCAAAAAATTCGGTGAAAATCTGTTGAAAACTAGGAATTTAGACTAAATTGACGATTGGTTGAGGCTATCGGACTACAAAC	CTATATTTGGAGCTA	642	PASS	END=14425698;SVTYPE=DEL;SVLEN=-270;CIGAR=1M14I270D	GT:FT:GQ:PL:PR:SR	1/1:PASS:39:695,42,0:0,7:0,16	Deletion	Homozygous	P0_N2_control_hermaphrodite	14425698	I	0	0	0	0	0	rep.1	53267041			0
144205	II	1450589	MantaBND:424:0:1:0:0:0:1	T	T]II:1455910]	27	PASS	SVTYPE=BND;MATEID=MantaBND:424:0:1:0:0:0:0;IMPRECISE;CIPOS=-221,221;BND_DEPTH=61;MATE_BND_DEPTH=50	GT:FT:GQ:PL:PR	0/1:PASS:27:77,0,282:19,6	Translocation	Heterozygous	P0_N2_control_hermaphrodite	1455910	II	0	-221	221	0	0	rep.1	53267041	2		221
144205	II	1453720	MantaBND:424:1:7:1:1:0:1	T	[II:1457818[T	137	PASS	SVTYPE=BND;MATEID=MantaBND:424:1:7:1:1:0:0;CIPOS=0,49;HOMLEN=49;HOMSEQ=TTTTCCGCCGATTCGAAATTTTCCGCAAGTAGATTTTTCCGCCGGTTCG;BND_DEPTH=84;MATE_BND_DEPTH=84	GT:FT:GQ:PL:PR:SR	0/1:PASS:137:187,0,305:11,4:18,4	Translocation	Heterozygous	P0_N2_control_hermaphrodite	1457818	II	49	0	49	0	0	rep.1	53267041	4		49
144205	II	1455910	MantaBND:424:0:1:0:0:0:0	A	A]II:1450589]	27	PASS	SVTYPE=BND;MATEID=MantaBND:424:0:1:0:0:0:1;IMPRECISE;CIPOS=-206,207;BND_DEPTH=50;MATE_BND_DEPTH=61	GT:FT:GQ:PL:PR	0/1:PASS:27:77,0,282:19,6	Translocation	Heterozygous	P0_N2_control_hermaphrodite	1450589	II	0	-206	207	0	0	rep.1	53267041	2		207
144205	II	1457769	MantaBND:424:1:7:1:1:0:0	G	[II:1453769[G	137	PASS	SVTYPE=BND;MATEID=MantaBND:424:1:7:1:1:0:1;CIPOS=0,49;HOMLEN=49;HOMSEQ=AACCGGCGGAAAAATCTACTTGCGGAAAATTTCGAATCGGCGGAAAAAT;BND_DEPTH=84;MATE_BND_DEPTH=84	GT:FT:GQ:PL:PR:SR	0/1:PASS:137:187,0,305:11,4:18,4	Translocation	Heterozygous	P0_N2_control_hermaphrodite	1453769	II	49	0	49	0	0	rep.1	53267041	4		49
144205	II	1659342	MantaBND:440:2:3:0:0:0:1	A	]X:8651762]A	130	PASS	SVTYPE=BND;MATEID=MantaBND:440:2:3:0:0:0:0;IMPRECISE;CIPOS=-164,164;BND_DEPTH=41;MATE_BND_DEPTH=77	GT:FT:GQ:PL:PR	0/1:PASS:130:180,0,214:16,12	Translocation	Heterozygous	P0_N2_control_hermaphrodite	8651762	X	0	-164	164	0	0	rep.1	53267041	3		164		LONGPAL3
144205	II	1659685	MantaBND:440:0:1:0:0:0:1	T	T[IV:4198389[	54	PASS	SVTYPE=BND;MATEID=MantaBND:440:0:1:0:0:0:0;IMPRECISE;CIPOS=-165,166;BND_DEPTH=74;MATE_BND_DEPTH=44	GT:FT:GQ:PL:PR	0/1:PASS:54:104,0,536:36,12	Translocation	Heterozygous	P0_N2_control_hermaphrodite	4198389	IV	0	-165	166	0	0	rep.1	53267041	1		166			LONGPAL3
144205	II	2141116	MantaBND:451:0:1:0:0:0:1	A	A[V:686153[	853	PASS	SVTYPE=BND;MATEID=MantaBND:451:0:1:0:0:0:0;CIPOS=0,12;HOMLEN=12;HOMSEQ=TTAACAAGGAAA;BND_DEPTH=52;MATE_BND_DEPTH=91	GT:FT:GQ:PL:PR:SR	0/1:PASS:393:903,0,390:13,9:26,24	Translocation	Heterozygous	P0_N2_control_hermaphrodite	686153	V	12	0	12	0	0	rep.1	53267041	1		12
144205	II	2897567	MantaDUP:TANDEM:466:0:1:0:1:0	G	<DUP:TANDEM>	396	PASS	END=2898963;SVTYPE=DUP;SVLEN=1396;CIPOS=0,24;CIEND=0,24;HOMLEN=24;HOMSEQ=TAGTCCTAAAATTGTGATTTTTAG	GT:FT:GQ:PL:PR:SR	0/1:PASS:395:446,0,400:10,10:31,14	Tandem Duplication	Heterozygous	P0_N2_control_hermaphrodite	2898963	II	24	0	24	0	24	rep.1	53267041			24
144205	II	3833797	MantaINS:502:0:0:0:0:1	ACG	ATGGCTAGTTTAGGGGTGACAGGCAAACGATTTTTTCCGGCAAATCAGCAAACCGGCAATTTGCCGAATTTGCCGGAAAAAACTCAATTGCCGTCCACTCCTGTGATAGTGGATGGTTGT	999	PASS	END=3833799;SVTYPE=INS;SVLEN=119;CIGAR=1M119I2D	GT:FT:GQ:PL:PR:SR	0/1:PASS:385:999,0,382:1,4:32,36	Insertion	Heterozygous	P0_N2_control_hermaphrodite	3833799	II	0	0	0	0	0	rep.1	53267041			0
144205	II	3834811	MantaDEL:507:0:0:0:0:0	TGCATAAATGGGCATAAATGGGCCAATGAAAAGCATAAATGGGCCAATGAAT	TAAGATATAG	999	PASS	END=3834862;SVTYPE=DEL;SVLEN=-51;CIGAR=1M9I51D	GT:FT:GQ:PL:PR:SR	0/1:PASS:515:999,0,512:11,0:43,33	Deletion	Heterozygous	P0_N2_control_hermaphrodite	3834862	II	0	0	0	0	0	rep.1	53267041			0
144205	II	6163864	MantaDEL:548:0:2:0:0:0	G	<DEL>	43	PASS	END=6166863;SVTYPE=DEL;SVLEN=-2999;CIPOS=0,2;CIEND=0,2;HOMLEN=2;HOMSEQ=TC	GT:FT:GQ:PL:PR:SR	0/1:PASS:43:93,0,661:23,4:48,21	Deletion	Heterozygous	P0_N2_control_hermaphrodite	6166863	II	2	0	2	0	2	rep.1	53267041			2
144205	II	6630113	MantaDUP:TANDEM:564:0:1:0:0:0	C	<DUP:TANDEM>	999	PASS	END=6630883;SVTYPE=DUP;SVLEN=770	GT:FT:GQ:PL:PR:SR	0/1:PASS:999:999,0,999:38,29:71,33	Tandem Duplication	Heterozygous	P0_N2_control_hermaphrodite	6630883	II	0	0	0	0	0	rep.1	53267041			0
144205	II	6669184	MantaINS:563:0:0:0:4:0	T	<INS>	999	PASS	END=6669184;SVTYPE=INS;CIPOS=0,6;CIEND=0,6;HOMLEN=6;HOMSEQ=CATTTC;LEFT_SVINSSEQ=CATTTCCGATGCATTTAATATTATTCCGAATAATACCAGAGTTGGACCACCAGGATTTGTTATCCTGATTGCAAATTCGTGAGTGTTCGCCATGATCACTGTTTCAGAAATTCAATTTTCAGCGCTGATTCGGTTCCAACTTCTGTGAATTCCGCTGTGAATTTGAAAGCTCAAGGGTTTGAAATTGTCACAGTTGGATTTAAATCAGCTGGAGATTTTACCTCGTTGTCATCACAGCCTGGTTTCAACTTCAAAATTCATCAGGACGGTGATATG;RIGHT_SVINSSEQ=GCTCTCACTTGTCCCATTCCCTACTGG…	GT:FT:GQ:PL:PR:SR	1/1:PASS:160:999,163,0:0,0:0,66	Insertion	Homozygous	P0_N2_control_hermaphrodite	6669184	II	6	0	6	0	6	rep.1	53267041			6
144205	II	7801507	MantaDEL:605:0:0:0:0:0	ATAAGACAATGCCAAAGTGATAACTTTCCTGAAGGCACATTTACTTCGCCTAATTTTTGATTTTTAAAACAAATAAATATTTACATTTTCTAATATTGATC	A	309	PASS	END=7801607;SVTYPE=DEL;SVLEN=-100;CIGAR=1M100D;CIPOS=0,100;HOMLEN=100;HOMSEQ=TAAGACAATGCCAAAGTGATAACTTTCCTGAAGGCACATTTACTTCGCCTAATTTTTGATTTTTAAAACAAATAAATATTTACATTTTCTAATATTGATC	GT:FT:GQ:PL:PR:SR	1/1:PASS:21:362,24,0:0,0:0,8	Deletion	Homozygous	P0_N2_control_hermaphrodite	7801607	II	100	0	100	0	0	rep.1	53267041			100
144205	II	10122121	MantaDUP:TANDEM:677:0:1:0:0:0	A	<DUP:TANDEM>	619	PASS	END=10122290;SVTYPE=DUP;SVLEN=169;CIPOS=0,28;CIEND=0,28;HOMLEN=28;HOMSEQ=TTCTTCCAAACCAAACACCCAATTTTTT	GT:FT:GQ:PL:PR:SR	0/1:PASS:619:669,0,919:19,7:78,26	Tandem Duplication	Heterozygous	P0_N2_control_hermaphrodite	10122290	II	28	0	28	0	28	rep.1	53267041			28
144205	II	11027622	MantaDUP:TANDEM:692:0:1:0:0:0	C	<DUP:TANDEM>	330	PASS	END=11027691;SVTYPE=DUP;SVLEN=69;SVINSLEN=3;SVINSSEQ=AGT	GT:FT:GQ:PL:PR:SR	0/1:PASS:310:380,0,307:8,4:25,14	Tandem Duplication	Heterozygous	P0_N2_control_hermaphrodite	11027691	II	0	0	0	0	0	rep.1	53267041			0
144205	II	11027640	MantaINS:692:0:0:0:0:0	C	CCGTGAAGATCGCCGTGACCGAAGCAAGGATCGGGAGGATCGTCGTGATCGCAGTAAGGATCGAGACGATCGT	999	PASS	END=11027640;SVTYPE=INS;SVLEN=72;CIGAR=1M72I;CIPOS=0,32;HOMLEN=32;HOMSEQ=CGTGAAGATCGCCGTGACCGAAGCAAGGATCG	GT:FT:GQ:PL:PR:SR	1/1:PASS:151:999,154,0:0,0:0,63	Insertion	Homozygous	P0_N2_control_hermaphrodite	11027640	II	32	0	32	0	0	rep.1	53267041			32
144205	II	11211528	MantaDUP:TANDEM:694:0:1:0:0:0	T	<DUP:TANDEM>	62	PASS	END=11212137;SVTYPE=DUP;SVLEN=609;IMPRECISE;CIPOS=-181,181;CIEND=-213,213	GT:FT:GQ:PL:PR	0/1:PASS:62:112,0,373:26,11	Tandem Duplication	Heterozygous	P0_N2_control_hermaphrodite	11212137	II	0	-181	181	-213	213	rep.1	53267041			213
144205	II	11704655	MantaINS:718:0:0:0:0:0	G	GTTTTTTCAAATGTGCCTCCGTGGAGAAAACCATCTGAAATGTTAAAAAAATTATGTTTTT	999	PASS	END=11704655;SVTYPE=INS;SVLEN=60;CIGAR=1M60I;CIPOS=0,9;HOMLEN=9;HOMSEQ=TTTTTTCAA	GT:FT:GQ:PL:PR:SR	1/1:PASS:74:999,77,0:0,0:0,38	Insertion	Homozygous	P0_N2_control_hermaphrodite	11704655	II	9	0	9	0	0	rep.1	53267041			9
144205	II	13583084	MantaDUP:TANDEM:774:0:1:0:0:0	C	<DUP:TANDEM>	639	PASS	END=13583647;SVTYPE=DUP;SVLEN=563;SVINSLEN=1;SVINSSEQ=T	GT:FT:GQ:PL:PR:SR	0/1:PASS:391:689,0,388:19,7:24,14	Tandem Duplication	Heterozygous	P0_N2_control_hermaphrodite	13583647	II	0	0	0	0	0	rep.1	53267041			0
144205	II	13870587	MantaDUP:TANDEM:769:0:1:0:0:0	T	<DUP:TANDEM>	103	PASS	END=13871171;SVTYPE=DUP;SVLEN=584;IMPRECISE;CIPOS=-209,209;CIEND=-194,195	GT:FT:GQ:PL:PR	0/1:PASS:103:153,0,293:21,12	Tandem Duplication	Heterozygous	P0_N2_control_hermaphrodite	13871171	II	0	-209	209	-194	195	rep.1	53267041			209
144205	II	15049557	MantaBND:797:1:2:0:0:0:0	T	T]II:15050142]	427	PASS	SVTYPE=BND;MATEID=MantaBND:797:1:2:0:0:0:1;CIPOS=0,2;HOMLEN=2;HOMSEQ=TT;BND_DEPTH=44;MATE_BND_DEPTH=30	GT:FT:GQ:PL:PR:SR	0/1:PASS:344:477,0,341:5,7:25,9	Translocation	Heterozygous	P0_N2_control_hermaphrodite	15050142	II	2	0	2	0	0	rep.1	53267041	2		2			LONGPAL3
144205	II	15050140	MantaBND:797:1:2:0:0:0:1	A	A]II:15049559]	427	PASS	SVTYPE=BND;MATEID=MantaBND:797:1:2:0:0:0:0;CIPOS=0,2;HOMLEN=2;HOMSEQ=AA;BND_DEPTH=30;MATE_BND_DEPTH=44	GT:FT:GQ:PL:PR:SR	0/1:PASS:344:477,0,341:5,7:25,9	Translocation	Heterozygous	P0_N2_control_hermaphrodite	15049559	II	2	0	2	0	0	rep.1	53267041	2		2		LONGPAL3
144205	III	578314	MantaDUP:TANDEM:816:0:1:0:0:0	A	<DUP:TANDEM>	241	PASS	END=578701;SVTYPE=DUP;SVLEN=387;CIPOS=0,37;CIEND=0,37;HOMLEN=37;HOMSEQ=TTAGCAGACCCAAGTATGGTCTGCTAAATATTTAGCA	GT:FT:GQ:PL:PR:SR	0/1:PASS:241:291,0,622:26,3:43,9	Tandem Duplication	Heterozygous	P0_N2_control_hermaphrodite	578701	III	37	0	37	0	37	rep.1	53267041			37
144205	III	2261463	MantaINS:850:0:0:0:0:0	T	TAAAAATGGGGAATTAGAGTGCGAAGTTAAAGGTGGAGTAGCGTCAGTGTGGA	999	PASS	END=2261463;SVTYPE=INS;SVLEN=52;CIGAR=1M52I;CIPOS=0,2;HOMLEN=2;HOMSEQ=AA	GT:FT:GQ:PL:PR:SR	1/1:PASS:112:999,115,0:0,0:0,41	Insertion	Homozygous	P0_N2_control_hermaphrodite	2261463	III	2	0	2	0	0	rep.1	53267041			2
144205	III	2893360	MantaINS:868:0:0:0:3:0	A	<INS>	999	PASS	END=2893360;SVTYPE=INS;CIPOS=0,4;CIEND=0,4;HOMLEN=4;HOMSEQ=GATC;LEFT_SVINSSEQ=GATCAGAAAACATAGAGACGGGGCGTTTGAAAGTTCAAAAAACGTAACTAGAAAAATTTTAAAAATTAAAAAAAAAAACGATTTTGAGGGAATTTTTGGCCAACTTTCTAAAAATTTAATTAGTAATTCTATATAAATTCCAGAAAAAAAATTGACGATGAGGAAATGAGCCGAAAATTTGTAAGCTATTGTTTCGTTGACTCTTTTCAGACAGTTTCCCCA;RIGHT_SVINSSEQ=ATCCTTATCTACGTGTTTAATCTGTCCTCAGAATCAGAATCAAAATCAGTCTTCGATTTGGAATCGACAAGT	GT:FT:GQ:PL:PR:SR	1/1:PASS:128:999,131,0:0,1:0,48	Insertion	Homozygous	P0_N2_control_hermaphrodite	2893360	III	4	0	4	0	4	rep.1	53267041			4
144205	III	4670587	MantaINS:874:2:2:0:0:0	T	TTTTTCGGACGTCCGAAAAACCGGACGCGGGTGCGTCCGGTTTTTTTGTTTTTTGTTTACATCTCAGTGAGACTGAGTAAGATTGTAAACAAAAAACAAAAAAACAAA	920	PASS	END=4670587;SVTYPE=INS;SVLEN=107;CIGAR=1M107I;CIPOS=0,27;HOMLEN=27;HOMSEQ=TTTTCGGACGTCCGAAAAACCGGACGC	GT:FT:GQ:PL:PR:SR	1/1:PASS:56:973,59,0:0,0:0,21	Insertion	Homozygous	P0_N2_control_hermaphrodite	4670587	III	27	0	27	0	0	rep.1	53267041			27
144205	III	4670588	MantaBND:874:1:2:0:1:0:1	T	]V:20705450]T	763	PASS	SVTYPE=BND;MATEID=MantaBND:874:1:2:0:1:0:0;BND_DEPTH=38;MATE_BND_DEPTH=100	GT:FT:GQ:PL:PR:SR	0/1:PASS:100:813,0,97:2,3:12,18	Translocation	Heterozygous	P0_N2_control_hermaphrodite	20705450	V	0	0	0	0	0	rep.1	53267041	3		0
144205	III	9101344	MantaBND:1037:0:0:0:0:0:0	C	C]III:9101511]	34	PASS	SVTYPE=BND;MATEID=MantaBND:1037:0:0:0:0:0:1;IMPRECISE;CIPOS=-290,290;BND_DEPTH=57;MATE_BND_DEPTH=65	GT:FT:GQ:PL:PR	0/1:PASS:34:84,0,366:25,9	Translocation	Heterozygous	P0_N2_control_hermaphrodite	9101511	III	0	-290	290	0	0	rep.1	53267041	2		290
144205	III	9101511	MantaBND:1037:0:0:0:0:0:1	C	C]III:9101344]	34	PASS	SVTYPE=BND;MATEID=MantaBND:1037:0:0:0:0:0:0;IMPRECISE;CIPOS=-195,196;BND_DEPTH=65;MATE_BND_DEPTH=57	GT:FT:GQ:PL:PR	0/1:PASS:34:84,0,366:25,9	Translocation	Heterozygous	P0_N2_control_hermaphrodite	9101344	III	0	-195	196	0	0	rep.1	53267041	2		196
144205	III	9938753	MantaINS:1066:0:0:2:0:0	C	CTCTGCTAAATATTTAGCATACCCACATTGGGTCTGCTAAATATTTAGCATACCCACATTGGGTCTGCTAAATATTTAGCATACCCACCTTGGG	568	PASS	END=9938753;SVTYPE=INS;SVLEN=93;CIGAR=1M93I;CIPOS=0,55;HOMLEN=55;HOMSEQ=TCTGCTAAATATTTAGCATACCCACATTGGGTCTGCTAAATATTTAGCATACCCA	GT:FT:GQ:PL:PR:SR	1/1:PASS:50:621,53,0:0,0:0,23	Insertion	Homozygous	P0_N2_control_hermaphrodite	9938753	III	55	0	55	0	0	rep.1	53267041			55
144205	III	10557581	MantaINS:1084:0:0:0:0:0	A	ACCGCAAGTAGATTCTTTCCGCCGGTTCGAAATTTTCCGCAAGTAGATTTTTCCGCCGGTAGATTTTTCCGGTGGTAGATTCTTTCCGCCGGTTCGAGTTTTT	999	PASS	END=10557581;SVTYPE=INS;SVLEN=102;CIGAR=1M102I;CIPOS=0,36;HOMLEN=36;HOMSEQ=CCGCAAGTAGATTCTTTCCGCCGGTTCGAAATTTTC	GT:FT:GQ:PL:PR:SR	1/1:PASS:120:999,123,0:0,0:0,50	Insertion	Homozygous	P0_N2_control_hermaphrodite	10557581	III	36	0	36	0	0	rep.1	53267041			36
144205	III	11114030	MantaBND:1085:0:1:0:0:0:0	A	[V:17040241[A	73	PASS	SVTYPE=BND;MATEID=MantaBND:1085:0:1:0:0:0:1;IMPRECISE;CIPOS=-175,175;BND_DEPTH=19;MATE_BND_DEPTH=33	GT:FT:GQ:PL:PR	0/1:PASS:73:123,0,117:9,9	Translocation	Heterozygous	P0_N2_control_hermaphrodite	17040241	V	0	-175	175	0	0	rep.1	53267041	4		175			LINE2F_CE
144205	III	11114378	MantaBND:1085:1:2:1:0:0:0	T	T]V:17040204]	412	PASS	SVTYPE=BND;MATEID=MantaBND:1085:1:2:1:0:0:1;CIPOS=0,59;HOMLEN=59;HOMSEQ=TCGCTTTTTTCACGGCCACCTCTTCCATTTGAAAACAGGGGGGAAATTAGAAACCCGTG;BND_DEPTH=40;MATE_BND_DEPTH=28	GT:FT:GQ:PL:PR:SR	0/1:PASS:33:462,0,30:4,11:2,5	Translocation	Heterozygous	P0_N2_control_hermaphrodite	17040204	V	59	0	59	0	0	rep.1	53267041	2		59			LINE2F_CE
144205	III	11932011	MantaDUP:TANDEM:1101:0:1:0:0:0	A	<DUP:TANDEM>	115	PASS	END=11932246;SVTYPE=DUP;SVLEN=235;SVINSLEN=8;SVINSSEQ=TATAGATG	GT:FT:GQ:PL:PR:SR	0/1:PASS:115:165,0,748:22,3:37,24	Tandem Duplication	Heterozygous	P0_N2_control_hermaphrodite	11932246	III	0	0	0	0	0	rep.1	53267041			0
144205	III	12131946	MantaBND:410:18:19:0:0:0:0	T	T[V:18566363[	50	PASS	SVTYPE=BND;MATEID=MantaBND:410:18:19:0:0:0:1;IMPRECISE;CIPOS=-275,275;BND_DEPTH=66;MATE_BND_DEPTH=43	GT:FT:GQ:PL:PR	0/1:PASS:50:100,0,504:34,10	Translocation	Heterozygous	P0_N2_control_hermaphrodite	18566363	V	0	-275	275	0	0	rep.1	53267041	1		275		(TTAGGC)n	(GGCTTA)n
144205	III	12132011	MantaBND:410:18:20:0:0:0:1	T	]V:18566677]T	23	PASS	SVTYPE=BND;MATEID=MantaBND:410:18:20:0:0:0:0;IMPRECISE;CIPOS=-236,236;BND_DEPTH=66;MATE_BND_DEPTH=56	GT:FT:GQ:PL:PR	0/1:PASS:23:73,0,523:35,10	Translocation	Heterozygous	P0_N2_control_hermaphrodite	18566677	V	0	-236	236	0	0	rep.1	53267041	3		236		(TTAGGC)n	(GGCTTA)n
144205	III	12376545	MantaBND:1115:0:1:1:0:0:1	T	[III:12627387[T	521	PASS	SVTYPE=BND;MATEID=MantaBND:1115:0:1:1:0:0:0;CIPOS=0,20;HOMLEN=20;HOMSEQ=AAAATTTCAAACGAAAATTC;BND_DEPTH=35;MATE_BND_DEPTH=58	GT:FT:GQ:PL:PR:SR	0/1:PASS:347:571,0,344:18,4:25,16	Translocation	Heterozygous	P0_N2_control_hermaphrodite	12627387	III	20	0	20	0	0	rep.1	53267041	4		20
144205	III	12627367	MantaBND:1115:0:1:1:0:0:0	A	[III:12376565[A	521	PASS	SVTYPE=BND;MATEID=MantaBND:1115:0:1:1:0:0:1;CIPOS=0,20;HOMLEN=20;HOMSEQ=ATTTTCGTTTGAAATTTTAA;BND_DEPTH=58;MATE_BND_DEPTH=35	GT:FT:GQ:PL:PR:SR	0/1:PASS:347:571,0,344:18,4:25,16	Translocation	Heterozygous	P0_N2_control_hermaphrodite	12376565	III	20	0	20	0	0	rep.1	53267041	4		20
144205	IV	1236084	MantaINS:1160:0:0:0:4:0	T	<INS>	999	PASS	END=1236084;SVTYPE=INS;CIPOS=0,10;CIEND=0,10;HOMLEN=10;HOMSEQ=TTGCGAAAAA;LEFT_SVINSSEQ=TTGCGAAAAAAATTGCCAATTTTTCGCAATAAACGGTAAAAAATAAATTTTATTTCGAAAAACCGCTTCAAATAAATCTTAAAATTCTTTTAAAAAATCAATAAATTATCGATTTTTGCAGAAATGTGTACAATTATACAG;RIGHT_SVINSSEQ=CTGTAAAGAACTGTATAATTGTACACATTTCTGCAAAAATCGATAATTTATTGATTTTTTAAAAGAATTTTAAGATTTATTTGAAGCGGTTTTTCGAAATAAAATTTCTTTTTTACCGTTTA	GT:FT:GQ:PL:PR:SR	1/1:PASS:113:999,116,0:0,0:0,55	Insertion	Homozygous	P0_N2_control_hermaphrodite	1236084	IV	10	0	10	0	10	rep.1	53267041			10
144205	IV	1312645	MantaBND:1164:0:1:1:0:0:1	G	G]X:216896]	284	PASS	SVTYPE=BND;MATEID=MantaBND:1164:0:1:1:0:0:0;CIPOS=0,8;HOMLEN=8;HOMSEQ=AGATCAAC;BND_DEPTH=45;MATE_BND_DEPTH=15	GT:FT:GQ:PL:PR:SR	0/1:PASS:284:334,0,371:14,3:24,10	Translocation	Heterozygous	P0_N2_control_hermaphrodite	216896	X	8	0	8	0	0	rep.1	53267041	2		8
144205	IV	4198389	MantaBND:440:0:1:0:0:0:0	A	]II:1659685]A	54	PASS	SVTYPE=BND;MATEID=MantaBND:440:0:1:0:0:0:1;IMPRECISE;CIPOS=-116,116;BND_DEPTH=44;MATE_BND_DEPTH=74	GT:FT:GQ:PL:PR	0/1:PASS:54:104,0,536:36,12	Translocation	Heterozygous	P0_N2_control_hermaphrodite	1659685	II	0	-116	116	0	0	rep.1	53267041	3		116		LONGPAL3
144205	IV	4816396	MantaBND:1228:0:2:1:0:0:1	A	ATCGACT[V:9724732[	999	PASS	SVTYPE=BND;MATEID=MantaBND:1228:0:2:1:0:0:0;SVINSLEN=6;SVINSSEQ=TCGACT;BND_DEPTH=92;MATE_BND_DEPTH=91	GT:FT:GQ:PL:PR:SR	0/1:PASS:297:999,0,294:14,14:18,36	Translocation	Heterozygous	P0_N2_control_hermaphrodite	9724732	V	0	0	0	0	0	rep.1	53267041	1	TCGACT	0		IR3_CE	CELE14B
144205	IV	4816445	MantaBND:1228:0:2:0:0:0:1	A	A]V:9724748]	63	PASS	SVTYPE=BND;MATEID=MantaBND:1228:0:2:0:0:0:0;IMPRECISE;CIPOS=-168,169;BND_DEPTH=65;MATE_BND_DEPTH=91	GT:FT:GQ:PL:PR	0/1:PASS:63:113,0,165:12,8	Translocation	Heterozygous	P0_N2_control_hermaphrodite	9724748	V	0	-168	169	0	0	rep.1	53267041	2		169		IR3_CE	CELE14B
144205	IV	6320432	MantaBND:1248:0:1:0:0:0:1	T	]V:4914049]TGT	999	PASS	SVTYPE=BND;MATEID=MantaBND:1248:0:1:0:0:0:0;SVINSLEN=2;SVINSSEQ=TG;BND_DEPTH=58;MATE_BND_DEPTH=55	GT:FT:GQ:PL:PR:SR	0/1:PASS:194:999,0,191:7,19:17,21	Translocation	Heterozygous	P0_N2_control_hermaphrodite	4914049	V	0	0	0	0	0	rep.1	53267041	3	TG	0		PALTA3_CE
144205	IV	6470028	MantaBND:135:0:3:0:0:0:1	A	A[I:4548880[	123	PASS	SVTYPE=BND;MATEID=MantaBND:135:0:3:0:0:0:0;IMPRECISE;CIPOS=-104,104;BND_DEPTH=45;MATE_BND_DEPTH=82	GT:FT:GQ:PL:PR	0/1:PASS:123:173,0,371:26,13	Translocation	Heterozygous	P0_N2_control_hermaphrodite	4548880	I	0	-104	104	0	0	rep.1	53267041	1		104			(TTTTAA)n
144205	IV	7485251	MantaINS:1283:0:0:0:0:0	A	AGGATCCGAAAAGTATCGAACAAGTGATGACACGTCTACAAATTAGCAAACAATGGAATACACTTCGTGCTCTACTCAACTATGTTCGTTCGAATCAAATGGATTCCATGATCCGCTCGTTCCCGCTTATTTGGTTCCGTGTTTATGAAAATGCCTTGATTGAATTGAATGGTGGATCCATGGCGAATCCAGATTGGAATTACGAACAATGCGTTATGCTTCGAAAATGGACTTTGTGGGCAATGAGCAGCAATGTCGAAGGAGGACGTCAACCAAATATTGCTCGATTCCTCCGTGAAATCAATTGTCCCATCAGTGCCTCGATTATTTCTGTCCTTTCTAACTGGACTATTGATGTAAGTTCAATTTAAACAATATTTATAATCATTTAATTTACCA…	999	PASS	END=7485251;SVTYPE=INS;SVLEN=439;CIGAR=1M439I;CIPOS=0,10;HOMLEN=10;HOMSEQ=GGATCCGAAA	GT:FT:GQ:PL:PR:SR	1/1:PASS:148:999,151,0:0,1:0,56	Insertion	Homozygous	P0_N2_control_hermaphrodite	7485251	IV	10	0	10	0	0	rep.1	53267041			10
144205	IV	7596399	MantaDEL:1290:8:9:0:0:0	A	<DEL>	26	PASS	END=7599699;SVTYPE=DEL;SVLEN=-3300;IMPRECISE;CIPOS=-161,161;CIEND=-173,174	GT:FT:GQ:PL:PR	0/1:PASS:26:76,0,126:9,6	Deletion	Heterozygous	P0_N2_control_hermaphrodite	7599699	IV	0	-161	161	-173	174	rep.1	53267041			174
144205	IV	8566417	MantaBND:225:0:1:0:0:0:1	A	]I:8054335]A	999	PASS	SVTYPE=BND;MATEID=MantaBND:225:0:1:0:0:0:0;CIPOS=0,37;HOMLEN=37;HOMSEQ=CTCGGCATTTGGCTCTAGCTTCTTGCCCAAGTTTAGC;BND_DEPTH=91;MATE_BND_DEPTH=53	GT:FT:GQ:PL:PR:SR	0/1:PASS:416:999,0,413:12,8:34,29	Translocation	Heterozygous	P0_N2_control_hermaphrodite	8054335	I	37	0	37	0	0	rep.1	53267041	3		37
144205	IV	9852302	MantaDUP:TANDEM:1349:0:1:0:0:0	T	<DUP:TANDEM>	492	PASS	END=9852492;SVTYPE=DUP;SVLEN=190;CIPOS=0,4;CIEND=0,4;HOMLEN=4;HOMSEQ=AAAT	GT:FT:GQ:PL:PR:SR	0/1:PASS:492:542,0,869:33,2:68,35	Tandem Duplication	Heterozygous	P0_N2_control_hermaphrodite	9852492	IV	4	0	4	0	4	rep.1	53267041			4
144205	IV	12688217	MantaINS:1434:0:0:0:2:0	A	<INS>	999	PASS	END=12688217;SVTYPE=INS;CIPOS=0,7;CIEND=0,7;HOMLEN=7;HOMSEQ=AAAAATA;LEFT_SVINSSEQ=AAAAATACGATCGCACAAAAATAAACAACGACGCAACGACACTCCGCTGTTTTCAATCCCCGCCCACGATTTCATTTGCACTGCGGCCGCCACATTTCAGTGCAAATG;RIGHT_SVINSSEQ=CCACATTTCAGTGCAAATGAAATCGTGGCGAGGCTTAAAAATAGCGGAGTGTCGTTGCGTCGTTGTTTATTTTTGTGCGATCGTATTTTTTCTATAATAATT	GT:FT:GQ:PL:PR:SR	1/1:PASS:85:999,88,0:0,6:0,32	Insertion	Homozygous	P0_N2_control_hermaphrodite	12688217	IV	7	0	7	0	7	rep.1	53267041			7
144205	IV	16571333	MantaBND:874:7:8:0:0:0:0	C	]V:17490437]C	694	PASS	SVTYPE=BND;MATEID=MantaBND:874:7:8:0:0:0:1;CIPOS=0,38;HOMLEN=38;HOMSEQ=TAGGGCTGTGCAACCGGACGTCCGGTTTTTTCGGACGT;EVENT=MantaBND:874:7:8:0:0:0:0;JUNCTION_QUAL=414;BND_DEPTH=63;MATE_BND_DEPTH=38	GT:FT:GQ:PL:PR:SR	0/1:PASS:211:744,0,208:7,3:8,12	Translocation	Heterozygous	P0_N2_control_hermaphrodite	17490437	V	38	0	38	0	0	rep.1	53267041	3		38
144205	IV	16571413	MantaBND:874:4:7:0:1:0:1	T	T[V:20705302[	317	PASS	SVTYPE=BND;MATEID=MantaBND:874:4:7:0:1:0:0;CIPOS=0,19;HOMLEN=19;HOMSEQ=CGGACGCGTGTGCGTCCGG;BND_DEPTH=59;MATE_BND_DEPTH=101	GT:FT:GQ:PL:PR:SR	0/1:PASS:218:367,0,215:11,2:15,16	Translocation	Heterozygous	P0_N2_control_hermaphrodite	20705302	V	19	0	19	0	0	rep.1	53267041	1		19
144205	IV	16571432	MantaBND:874:7:8:1:0:0:0	G	G[V:17490457[	694	PASS	SVTYPE=BND;MATEID=MantaBND:874:7:8:1:0:0:1;EVENT=MantaBND:874:7:8:0:0:0:0;JUNCTION_QUAL=229;BND_DEPTH=59;MATE_BND_DEPTH=38	GT:FT:GQ:PL:PR:SR	0/1:PASS:211:744,0,208:6,7:5,13	Translocation	Heterozygous	P0_N2_control_hermaphrodite	17490457	V	0	0	0	0	0	rep.1	53267041	1		0
144205	IV	16938400	MantaINS:1529:0:0:0:3:0	A	<INS>	689	PASS	END=16938400;SVTYPE=INS;CIPOS=0,11;CIEND=0,11;HOMLEN=11;HOMSEQ=AAAATATAAAA;LEFT_SVINSSEQ=AAAATATAAAAAAAATTTTATATTTTAAAAAGGTTAAAAATTCCCATAGATTCGCTTATCAATTCAAAAAAAATTCCAAAAAGAATAGGAAAAAATAATTTTTAAATAAAAA;RIGHT_SVINSSEQ=TTTAAACAGTTTTCTGAAAATAATTTGGGAATTTTTTTTTTTAATTGAAAAATTATTTTTTCCTATTCTTTTTGGAATTTTTTTTGAATTGATAAGCGAATCTATGGGAATTTTTAACCTTTTT	GT:FT:GQ:PL:PR:SR	1/1:PASS:41:742,44,0:0,0:0,21	Insertion	Homozygous	P0_N2_control_hermaphrodite	16938400	IV	11	0	11	0	11	rep.1	53267041			11
144205	IV	17326045	MantaBND:71:2:5:1:0:0:1	C	CT[I:11511648[	699	PASS	SVTYPE=BND;MATEID=MantaBND:71:2:5:1:0:0:0;SVINSLEN=1;SVINSSEQ=T;BND_DEPTH=104;MATE_BND_DEPTH=41	GT:FT:GQ:PL:PR:SR	0/1:PASS:221:749,0,218:6,4:20,17	Translocation	Heterozygous	P0_N2_control_hermaphrodite	11511648	I	0	0	0	0	0	rep.1	53267041	1	T	0		PALTTAA3_CE	CELE46A
144205	IV	17326109	MantaBND:71:2:5:0:0:0:0	A	A]I:11511671]	33	PASS	SVTYPE=BND;MATEID=MantaBND:71:2:5:0:0:0:1;IMPRECISE;CIPOS=-99,100;BND_DEPTH=33;MATE_BND_DEPTH=41	GT:FT:GQ:PL:PR	0/1:PASS:33:83,0,182:13,7	Translocation	Heterozygous	P0_N2_control_hermaphrodite	11511671	I	0	-99	100	0	0	rep.1	53267041	2		100		PALTTAA3_CE	HAT3_CE
144205	V	686153	MantaBND:451:0:1:0:0:0:0	T	]II:2141116]T	853	PASS	SVTYPE=BND;MATEID=MantaBND:451:0:1:0:0:0:1;CIPOS=0,12;HOMLEN=12;HOMSEQ=TAACAAGGAAAG;BND_DEPTH=91;MATE_BND_DEPTH=52	GT:FT:GQ:PL:PR:SR	0/1:PASS:393:903,0,390:13,9:26,24	Translocation	Heterozygous	P0_N2_control_hermaphrodite	2141116	II	12	0	12	0	0	rep.1	53267041	3		12
144205	V	2600122	MantaINS:1611:0:0:0:0:0	G	GAAAAATTCGATGAATTTTTGAGAAAGTATCTGAACCAAAACAAAAAGTTATAAGCAGAATTTGCATAAAATAGTAAAACACATTATTGTGTATCATTTTACAATAAAATTAGATGTGTTTTACTATTTTATGCAACTTCTGCTTATAACTTTTTGTTTTGGTTCAGATACTTTCTC	999	PASS	END=2600122;SVTYPE=INS;SVLEN=176;CIGAR=1M176I;CIPOS=0,8;HOMLEN=8;HOMSEQ=AAAAATTC	GT:FT:GQ:PL:PR:SR	1/1:PASS:160:999,163,0:0,2:0,60	Insertion	Homozygous	P0_N2_control_hermaphrodite	2600122	V	8	0	8	0	0	rep.1	53267041			8
144205	V	2701131	MantaBND:317:0:1:0:0:0:1	T	T]I:11630191]	63	PASS	SVTYPE=BND;MATEID=MantaBND:317:0:1:0:0:0:0;IMPRECISE;CIPOS=-161,162;BND_DEPTH=38;MATE_BND_DEPTH=39	GT:FT:GQ:PL:PR	0/1:PASS:63:113,0,447:31,15	Translocation	Heterozygous	P0_N2_control_hermaphrodite	11630191	I	0	-161	162	0	0	rep.1	53267041	2		162		HAT1_CE
144205	V	4248554	MantaBND:388:0:1:0:0:0:0	G	[I:14340152[G	981	PASS	SVTYPE=BND;MATEID=MantaBND:388:0:1:0:0:0:1;CIPOS=0,1;HOMLEN=1;HOMSEQ=T;BND_DEPTH=42;MATE_BND_DEPTH=44	GT:FT:GQ:PL:PR:SR	0/1:PASS:16:999,0,13:3,3:6,26	Translocation	Heterozygous	P0_N2_control_hermaphrodite	14340152	I	1	0	1	0	0	rep.1	53267041	4		1
144205	V	4914043	MantaINS:1248:1:1:1:2:0	T	<INS>	999	PASS	END=4914043;SVTYPE=INS;CIPOS=0,6;CIEND=0,6;HOMLEN=6;HOMSEQ=TTTTGA;LEFT_SVINSSEQ=TTTTGATGTACACTCAAAATAATAAAACTGCGTGGCGTGTACTGCAGAAAACCTGATATTTAAGCCCCGCCTTTTTCT;RIGHT_SVINSSEQ=CCGCTATGTTTAACTCGTTGTGGGCGCGGCAAGCTGTCTCCGCCCGCTGCGAGTTAAACATAGCGGCGCGCGGAACACGTAGGATGTCGGCGGCCTGATATTGGTTGGTCCCCGAATTTTTGCCTTTTCTCCGTGAGTGGACGAGAAAAAGGCGGGGCCTAAATATTAGGTTTTCTGCAGTACACGCCACGCAGTTTTATTA	GT:FT:GQ:PL:PR:SR	1/1:PASS:103:999,106,0:0,7:0,31	Insertion	Homozygous	P0_N2_control_hermaphrodite	4914043	V	6	0	6	0	6	rep.1	53267041			6
144205	V	4914049	MantaBND:1248:0:1:0:0:0:0	A	ATG[IV:6320432[	999	PASS	SVTYPE=BND;MATEID=MantaBND:1248:0:1:0:0:0:1;SVINSLEN=2;SVINSSEQ=TG;BND_DEPTH=55;MATE_BND_DEPTH=58	GT:FT:GQ:PL:PR:SR	0/1:PASS:194:999,0,191:7,19:17,21	Translocation	Heterozygous	P0_N2_control_hermaphrodite	6320432	IV	0	0	0	0	0	rep.1	53267041	1	TG	0			PALTA3_CE
144205	V	9554018	MantaBND:70:2:4:0:0:0:1	A	A]X:466278]	999	PASS	SVTYPE=BND;MATEID=MantaBND:70:2:4:0:0:0:0;CIPOS=0,36;HOMLEN=36;HOMSEQ=TTCTCGGCATTTCGTGCCTACTTTCTCCCACCTTTT;BND_DEPTH=46;MATE_BND_DEPTH=131	GT:FT:GQ:PL:PR:SR	0/1:PASS:184:999,0,181:12,20:14,27	Translocation	Heterozygous	P0_N2_control_hermaphrodite	466278	X	36	0	36	0	0	rep.1	53267041	2		36
144205	V	9554051	MantaBND:70:4:5:0:0:0:0	T	[X:466019[T	897	PASS	SVTYPE=BND;MATEID=MantaBND:70:4:5:0:0:0:1;CIPOS=0,37;HOMLEN=37;HOMSEQ=TTTCGCCTTCCGGCAAAAAGGTGGGAGAAAGAAGACG;BND_DEPTH=38;MATE_BND_DEPTH=87	GT:FT:GQ:PL:PR:SR	0/1:PASS:390:947,0,387:20,7:31,22	Translocation	Heterozygous	P0_N2_control_hermaphrodite	466019	X	37	0	37	0	0	rep.1	53267041	4		37
144205	V	9724732	MantaBND:1228:0:2:1:0:0:0	A	]IV:4816396]TCGACTA	999	PASS	SVTYPE=BND;MATEID=MantaBND:1228:0:2:1:0:0:1;SVINSLEN=6;SVINSSEQ=TCGACT;BND_DEPTH=91;MATE_BND_DEPTH=92	GT:FT:GQ:PL:PR:SR	0/1:PASS:297:999,0,294:14,14:18,36	Translocation	Heterozygous	P0_N2_control_hermaphrodite	4816396	IV	0	0	0	0	0	rep.1	53267041	3	TCGACT	0		CELE14B	IR3_CE
144205	V	9724748	MantaBND:1228:0:2:0:0:0:0	A	A]IV:4816445]	63	PASS	SVTYPE=BND;MATEID=MantaBND:1228:0:2:0:0:0:1;IMPRECISE;CIPOS=-221,221;BND_DEPTH=91;MATE_BND_DEPTH=65	GT:FT:GQ:PL:PR	0/1:PASS:63:113,0,165:12,8	Translocation	Heterozygous	P0_N2_control_hermaphrodite	4816445	IV	0	-221	221	0	0	rep.1	53267041	2		221		CELE14B	IR3_CE
144205	V	10866798	MantaBND:14:0:1:0:0:0:0	C	C]I:238574]	65	PASS	SVTYPE=BND;MATEID=MantaBND:14:0:1:0:0:0:1;IMPRECISE;CIPOS=-218,218;BND_DEPTH=102;MATE_BND_DEPTH=48	GT:FT:GQ:PL:PR	0/1:PASS:65:115,0,590:40,12	Translocation	Heterozygous	P0_N2_control_hermaphrodite	238574	I	0	-218	218	0	0	rep.1	53267041	2		218
144205	V	11690781	MantaINS:1847:0:0:1:0:0	A	AAAAATTTTCAATAAAAAATCAAATAAATAAATAAATAAATATGCTGATAAAAACACACAAACTATTGAATTGATATCACTGATAAAATAATAAAGAATAATCAGTCTTGATTTTTGAATAAAAATTCCAAAGCAAGACTGATTATTCTTTATTATTTTATCAGTGATATCAATTCAATAGTTTGTGTGTTTTTATCAGCATATTTATTTATTTATTTATTTGATTTTTTATTGAAAATTTTTTATTG	999	PASS	END=11690781;SVTYPE=INS;SVLEN=247;CIGAR=1M247I;CIPOS=0,8;HOMLEN=8;HOMSEQ=AAAATTTT	GT:FT:GQ:PL:PR:SR	1/1:PASS:118:999,121,0:0,1:0,49	Insertion	Homozygous	P0_N2_control_hermaphrodite	11690781	V	8	0	8	0	0	rep.1	53267041			8
144205	V	11690781	MantaINS:1847:0:0:3:0:0	A	AAAAATTTTCAATAAAAAATCAAATAAATAAATAAATAAATATGCTGATAAAAACACACAAACTATTGAATTGATATCACTGATAAAATAATAAAGAATAATCAGTCTTGCTTTGGAATTTTTATTCAAAAATCAAGACTGATTATTCTTTATTATTTTATCAGTGATATCAATTCAATAGTTTGTGTGTTTTTATCAGCATATTTATTTATTTATTTATTTGATTTTTTATTGAAAATTTTTTATTG	999	PASS	END=11690781;SVTYPE=INS;SVLEN=247;CIGAR=1M247I;CIPOS=0,8;HOMLEN=8;HOMSEQ=AAAATTTT	GT:FT:GQ:PL:PR:SR	1/1:PASS:121:999,124,0:0,3:0,49	Insertion	Homozygous	P0_N2_control_hermaphrodite	11690781	V	8	0	8	0	0	rep.1	53267041			8
144205	V	12167424	MantaINS:1865:0:0:0:0:0	C	CCCTGGTGGTCCTGGTGGTCCGGCTGGGCATGTGATGCAAGCAGAAGCAGATGAGTGTTGTTCAGCAACTCCAGCTCCTCCAGCTTGTCCATCACCTCCTGGTTCTCCTGCCTCTCCTGGAGCACCATCCTCT	999	PASS	END=12167424;SVTYPE=INS;SVLEN=132;CIGAR=1M132I;CIPOS=0,20;HOMLEN=20;HOMSEQ=CCTGGTGGTCCTGGTGGTCC	GT:FT:GQ:PL:PR:SR	1/1:PASS:142:999,145,0:0,0:0,61	Insertion	Homozygous	P0_N2_control_hermaphrodite	12167424	V	20	0	20	0	0	rep.1	53267041			20
144205	V	12375972	MantaINS:1898:0:0:0:2:0	A	<INS>	999	PASS	END=12375972;SVTYPE=INS;LEFT_SVINSSEQ=CAGTGCTGGCCAAAAAGATATCCACTTTTGGTTTTTTGTGTGTAACTTTTTTCTCAAGCATCCATTTGACTTGAATTTTTCCGTGTGCATAAAGCGAAATGGTACGCAAATTTGCGGACCAAACATTACATGATTATCGATTTTTTCTGAATTTTATTTCAATTTTTTGATTTTTTCGTTTTTCCAATTTTCATTATTTTTTTGAATTATCAATAAAACGCACTCTGTTTGTTGCACTGGATTTGTTTGGTTGATAAATTATTTTTAAGGTATGGTAAAATC;RIGHT_SVINSSEQ=GTTATTCACAAGCTGATCGACTCGATGCCACGTCGTTGTCAAGCTGTTATTGATGCAAACGGA…	GT:FT:GQ:PL:PR:SR	1/1:PASS:126:999,129,0:2,6:0,49	Insertion	Homozygous	P0_N2_control_hermaphrodite	12375972	V	0	0	0	0	0	rep.1	53267041			0
144205	V	13362655	MantaDUP:TANDEM:1902:0:1:0:0:0	T	<DUP:TANDEM>	999	PASS	END=13367099;SVTYPE=DUP;SVLEN=4444;CIPOS=0,2;CIEND=0,2;HOMLEN=2;HOMSEQ=AT	GT:FT:GQ:PL:PR:SR	0/1:PASS:999:999,0,999:38,15:69,35	Tandem Duplication	Heterozygous	P0_N2_control_hermaphrodite	13367099	V	2	0	2	0	2	rep.1	53267041			2
144205	V	16812044	MantaINS:1581:1:1:0:0:0	G	GCTCCGCCCACTTTTGAACCAATCAGACGGAGTGGGCGGAGTTCGAAGACGCTGATTGGTTGGAAGCATTCCCATTTCGATTTTATATTAAAAAGAGATGTTTCGAACCAATCAGCGTCTTCGAA	865	PASS	END=16812044;SVTYPE=INS;SVLEN=124;CIGAR=1M124I;CIPOS=0,11;HOMLEN=11;HOMSEQ=CTCCGCCCACT	GT:FT:GQ:PL:PR:SR	1/1:PASS:53:918,56,0:0,0:0,23	Insertion	Homozygous	P0_N2_control_hermaphrodite	16812044	V	11	0	11	0	0	rep.1	53267041			11
144205	V	17040145	MantaBND:1085:1:2:1:0:0:1	A	A]III:11114437]	412	PASS	SVTYPE=BND;MATEID=MantaBND:1085:1:2:1:0:0:0;CIPOS=0,59;HOMLEN=59;HOMSEQ=CACGGGTTTCTAATTTCCCCCCTGTTTTCAAATGGAAGAGGTGGCCGTGAAAAAAGCGA;BND_DEPTH=28;MATE_BND_DEPTH=40	GT:FT:GQ:PL:PR:SR	0/1:PASS:33:462,0,30:4,11:2,5	Translocation	Heterozygous	P0_N2_control_hermaphrodite	11114437	III	59	0	59	0	0	rep.1	53267041	2		59		LINE2F_CE
144205	V	17040241	MantaBND:1085:0:1:0:0:0:1	T	[III:11114030[T	73	PASS	SVTYPE=BND;MATEID=MantaBND:1085:0:1:0:0:0:0;IMPRECISE;CIPOS=-240,241;BND_DEPTH=33;MATE_BND_DEPTH=19	GT:FT:GQ:PL:PR	0/1:PASS:73:123,0,117:9,9	Translocation	Heterozygous	P0_N2_control_hermaphrodite	11114030	III	0	-240	241	0	0	rep.1	53267041	4		241		LINE2F_CE
144205	V	17490437	MantaBND:874:7:8:0:0:0:1	G	G[IV:16571333[	694	PASS	SVTYPE=BND;MATEID=MantaBND:874:7:8:0:0:0:0;CIPOS=0,38;HOMLEN=38;HOMSEQ=CTAGGGCTGTGCAACCGGACGTCCGGTTTTTTCGGACG;EVENT=MantaBND:874:7:8:0:0:0:0;JUNCTION_QUAL=414;BND_DEPTH=38;MATE_BND_DEPTH=63	GT:FT:GQ:PL:PR:SR	0/1:PASS:211:744,0,208:7,3:8,12	Translocation	Heterozygous	P0_N2_control_hermaphrodite	16571333	IV	38	0	38	0	0	rep.1	53267041	1		38
144205	V	17490457	MantaBND:874:7:8:1:0:0:1	C	]IV:16571432]C	694	PASS	SVTYPE=BND;MATEID=MantaBND:874:7:8:1:0:0:0;EVENT=MantaBND:874:7:8:0:0:0:0;JUNCTION_QUAL=229;BND_DEPTH=38;MATE_BND_DEPTH=59	GT:FT:GQ:PL:PR:SR	0/1:PASS:211:744,0,208:6,7:5,13	Translocation	Heterozygous	P0_N2_control_hermaphrodite	16571432	IV	0	0	0	0	0	rep.1	53267041	3		0
144205	V	18175250	MantaDEL:2009:0:0:1:1:0	ACTTGACGCAATTCTAGTTCCTTGACGCAATTCTAGTGTATTGACGCAATTCTAGTACTTTGGCGCTATTCCAGTACTTTGGCGCAATTCTAGTTCCTTGACGCAATTCTAGTGTATTGACGCATATCTAGTACTTTGGCGCTATTCCAGTACATTGGCGCAATTCTAGTGG	A	109	PASS	END=18175421;SVTYPE=DEL;SVLEN=-171;CIGAR=1M171D;CIPOS=0,12;HOMLEN=12;HOMSEQ=CTTGACGCAATT	GT:FT:GQ:PL:PR:SR	0/1:PASS:109:159,0,808:26,0:70,13	Deletion	Heterozygous	P0_N2_control_hermaphrodite	18175421	V	12	0	12	0	0	rep.1	53267041			12
144205	V	18566363	MantaBND:410:18:19:0:0:0:1	T	]III:12131946]T	50	PASS	SVTYPE=BND;MATEID=MantaBND:410:18:19:0:0:0:0;IMPRECISE;CIPOS=-118,119;BND_DEPTH=43;MATE_BND_DEPTH=66	GT:FT:GQ:PL:PR	0/1:PASS:50:100,0,504:34,10	Translocation	Heterozygous	P0_N2_control_hermaphrodite	12131946	III	0	-118	119	0	0	rep.1	53267041	3		119		(GGCTTA)n	(CTTAG)n
144205	V	18566677	MantaBND:410:18:20:0:0:0:0	A	A[III:12132011[	23	PASS	SVTYPE=BND;MATEID=MantaBND:410:18:20:0:0:0:1;IMPRECISE;CIPOS=-100,101;BND_DEPTH=56;MATE_BND_DEPTH=66	GT:FT:GQ:PL:PR	0/1:PASS:23:73,0,523:35,10	Translocation	Heterozygous	P0_N2_control_hermaphrodite	12132011	III	0	-100	101	0	0	rep.1	53267041	1		101		(GGCTTA)n	(CTTAG)n
144205	V	18682676	MantaDEL:2051:0:0:0:0:0	AAAAAATTTCAAAATTCCAAAAAATTTCTAAATTTCTAAAATTTCAAAATTCCAAAAAATTTAAAAAATTAAAAATTCCACAAAATTTCAAAATTCCAAAAAATTTCAAAATTCCACAAAATTTCAAAATTCCAAAAAATTCAAAATTCCAAAAAATTTCAGAATTCCAAGAAATTTCAAAATTCCAAGAAATTTCAAAATTCCAAAAAATTTCAAAATTTTCAAAATTCCAAAAAATTTCAAAATTTCTAAAATTTCAAAATTCCAAAAAATTTAAAAATTTAAAAATTCCACAAAATTTCAAAATTCCAAAAAATTCAAAATTCCAAAAAATTTCAGAATTCCAAGAAATTTCAAAATTCCAAGAAATTTCAAAATTCCAAAAAATTTCAAAATTCC…	A	445	PASS	END=18683092;SVTYPE=DEL;SVLEN=-416;CIGAR=1M416D;CIPOS=0,15;HOMLEN=15;HOMSEQ=AAAAATTTCAAAATT	GT:FT:GQ:PL:PR:SR	0/1:PASS:445:495,0,520:18,8:36,13	Deletion	Heterozygous	P0_N2_control_hermaphrodite	18683092	V	15	0	15	0	0	rep.1	53267041			15
144205	V	18858817	MantaINS:2031:0:0:0:0:0	T	TATTTCGGCCTGAAATTTCAAATTTTCAGAACCTAGCCGATATGGGTGTCAAAATTTCGCAAATTTCATGGAGAATTCAAATTTTAATAGGAAAAACTACGAAAATCTCAAAATTTAGCAAATTTACAAGTGCAGGGACATGGGACACTCCACGTAAGATTTGAGTAACATTTTCGAAATCTCTGCGAAAATTTGACACCCATATTGACTGGGTTCTGAGAAATTTGAGTTTCCGGGCCGAAATAGGCCG	999	PASS	END=18858817;SVTYPE=INS;SVLEN=249;CIGAR=1M249I;CIPOS=0,32;HOMLEN=32;HOMSEQ=ATTTCGGCCTGAAATTTCAAATTTTCAGAACC	GT:FT:GQ:PL:PR:SR	1/1:PASS:67:999,70,0:0,0:0,29	Insertion	Homozygous	P0_N2_control_hermaphrodite	18858817	V	32	0	32	0	0	rep.1	53267041			32
144205	V	19877606	MantaDEL:363:1:1:2:0:0	TTTTTTTTCATCACACTTAATTAAAAAATTCATATTCTTCATGAAATTCTACACATTTCCCAATTTGGAA	TGAAT	291	PASS	END=19877675;SVTYPE=DEL;SVLEN=-69;CIGAR=1M4I69D	GT:FT:GQ:PL:PR:SR	0/1:PASS:291:341,0,447:2,0:37,11	Deletion	Heterozygous	P0_N2_control_hermaphrodite	19877675	V	0	0	0	0	0	rep.1	53267041			0
144205	V	20398658	MantaINS:2055:0:1:0:0:0	GGATT	GCGATTTTTAGAAATTTTGTGGAATTTTAGAACGTTTTTAAGAGTTTTTTGTGAATTTTTGGAACTTATTGAGGTTTTTAGGGATTCTTTTTTTGCAATTTTTGCGGACTTTTTGGAGGTTTTGGGAGAAATTTTGAGCGTTTTGGAAGGTTTTTAGACGATTTTTTTTGCAAATTTTGGAGATTTTTAGTATATTTTTCAATTTTAATCGGAATTTTAGAGAGAATCAGAAGGTTTTTGGGAGTTTGTTTTGCGAATTTTTGGAACTTTCTGAGGTTTTTAGAGA	786	PASS	END=20398662;SVTYPE=INS;SVLEN=285;CIGAR=1M285I4D	GT:FT:GQ:PL:PR:SR	0/1:PASS:15:836,0,11:5,0:4,22	Insertion	Heterozygous	P0_N2_control_hermaphrodite	20398662	V	0	0	0	0	0	rep.1	53267041			0
144205	V	20705302	MantaBND:874:4:7:0:1:0:0	C	]IV:16571413]C	317	PASS	SVTYPE=BND;MATEID=MantaBND:874:4:7:0:1:0:1;CIPOS=0,19;HOMLEN=19;HOMSEQ=GGACGCGTGTGCGTCCGGC;BND_DEPTH=101;MATE_BND_DEPTH=59	GT:FT:GQ:PL:PR:SR	0/1:PASS:218:367,0,215:11,2:15,16	Translocation	Heterozygous	P0_N2_control_hermaphrodite	16571413	IV	19	0	19	0	0	rep.1	53267041	3		19
144205	V	20705450	MantaBND:874:1:2:0:1:0:0	A	A[III:4670588[	763	PASS	SVTYPE=BND;MATEID=MantaBND:874:1:2:0:1:0:1;BND_DEPTH=100;MATE_BND_DEPTH=38	GT:FT:GQ:PL:PR:SR	0/1:PASS:100:813,0,97:2,3:12,18	Translocation	Heterozygous	P0_N2_control_hermaphrodite	4670588	III	0	0	0	0	0	rep.1	53267041	1		0
144205	X	216888	MantaBND:1164:0:1:1:0:0:0	T	T]IV:1312653]	284	PASS	SVTYPE=BND;MATEID=MantaBND:1164:0:1:1:0:0:1;CIPOS=0,8;HOMLEN=8;HOMSEQ=GTTGATCT;BND_DEPTH=15;MATE_BND_DEPTH=45	GT:FT:GQ:PL:PR:SR	0/1:PASS:284:334,0,371:14,3:24,10	Translocation	Heterozygous	P0_N2_control_hermaphrodite	1312653	IV	8	0	8	0	0	rep.1	53267041	2		8
144205	X	216891	MantaBND:1164:1:2:0:0:0:1	T	T]X:256071]	481	PASS	SVTYPE=BND;MATEID=MantaBND:1164:1:2:0:0:0:0;CIPOS=0,5;HOMLEN=5;HOMSEQ=GATCT;BND_DEPTH=15;MATE_BND_DEPTH=13	GT:FT:GQ:PL:PR:SR	1/1:PASS:32:534,35,0:0,7:0,8	Translocation	Homozygous	P0_N2_control_hermaphrodite	256071	X	5	0	5	0	0	rep.1	53267041	2		5
144205	X	256066	MantaBND:1164:1:2:0:0:0:0	G	G]X:216896]	481	PASS	SVTYPE=BND;MATEID=MantaBND:1164:1:2:0:0:0:1;CIPOS=0,5;HOMLEN=5;HOMSEQ=AGATC;BND_DEPTH=13;MATE_BND_DEPTH=15	GT:FT:GQ:PL:PR:SR	1/1:PASS:32:534,35,0:0,7:0,8	Translocation	Homozygous	P0_N2_control_hermaphrodite	216896	X	5	0	5	0	0	rep.1	53267041	2		5
144205	X	465982	MantaBND:70:4:5:0:0:0:1	G	[V:9554088[G	897	PASS	SVTYPE=BND;MATEID=MantaBND:70:4:5:0:0:0:0;CIPOS=0,37;HOMLEN=37;HOMSEQ=TCTTCTTTCTCCCACCTTTTTGCCGGAAGGCGAAAAA;BND_DEPTH=87;MATE_BND_DEPTH=38	GT:FT:GQ:PL:PR:SR	0/1:PASS:390:947,0,387:20,7:31,22	Translocation	Heterozygous	P0_N2_control_hermaphrodite	9554088	V	37	0	37	0	0	rep.1	53267041	4		37
144205	X	466242	MantaBND:70:2:4:0:0:0:0	A	A]V:9554054]	999	PASS	SVTYPE=BND;MATEID=MantaBND:70:2:4:0:0:0:1;CIPOS=0,36;HOMLEN=36;HOMSEQ=AAAAGGTGGGAGAAAGTAGGCACGAAATGCCGAGAA;BND_DEPTH=131;MATE_BND_DEPTH=46	GT:FT:GQ:PL:PR:SR	0/1:PASS:184:999,0,181:12,20:14,27	Translocation	Heterozygous	P0_N2_control_hermaphrodite	9554054	V	36	0	36	0	0	rep.1	53267041	2		36
144205	X	1417333	MantaINS:2085:0:0:0:0:0	A	AAACTCTTTTCCTTTCCTCAGTCACCGCGTTGGGGGGTTTTTCGAAGGTACCTCTAACTTGGTGACTGAGGAAAGGAAAAGAGTTTTTG	667	PASS	END=1417333;SVTYPE=INS;SVLEN=88;CIGAR=1M88I;CIPOS=0,10;HOMLEN=10;HOMSEQ=AACTCTTTTC	GT:FT:GQ:PL:PR:SR	0/1:PASS:25:717,0,22:0,0:12,24	Insertion	Heterozygous	P0_N2_control_hermaphrodite	1417333	X	10	0	10	0	0	rep.1	53267041			10
144205	X	6833298	MantaINS:2237:0:0:0:0:0	T	TCTAAACTTGGGCAAAAGTTAGGCAAAACTTTGGCAAGAGTTGGGTGAAACTTGGGTTAGACTTTGGTAAAGCTTGAATCCAAGTTTTGCCAAAGTCTTGCCTAACTTTTGCCCAAGTTTAGACAGCTTCTGATCCAAGTTAATATTTTTTGGG	739	PASS	END=6833298;SVTYPE=INS;SVLEN=153;CIGAR=1M153I;CIPOS=0,14;HOMLEN=14;HOMSEQ=CTAAACTTGGGCAA	GT:FT:GQ:PL:PR:SR	0/1:PASS:36:789,0,33:0,5:11,20	Insertion	Heterozygous	P0_N2_control_hermaphrodite	6833298	X	14	0	14	0	0	rep.1	53267041			14
144205	X	8651762	MantaBND:440:2:3:0:0:0:0	T	T[II:1659342[	130	PASS	SVTYPE=BND;MATEID=MantaBND:440:2:3:0:0:0:1;IMPRECISE;CIPOS=-242,242;BND_DEPTH=77;MATE_BND_DEPTH=41	GT:FT:GQ:PL:PR	0/1:PASS:130:180,0,214:16,12	Translocation	Heterozygous	P0_N2_control_hermaphrodite	1659342	II	0	-242	242	0	0	rep.1	53267041	1		242		(TTGTAT)n	LONGPAL3
144205	X	12190992	MantaBND:2368:0:1:0:0:0:1	C	C]X:12199124]	999	PASS	SVTYPE=BND;MATEID=MantaBND:2368:0:1:0:0:0:0;CIPOS=0,4;HOMLEN=4;HOMSEQ=GATC;BND_DEPTH=52;MATE_BND_DEPTH=44	GT:FT:GQ:PL:PR:SR	1/1:PASS:105:999,108,0:0,22:0,27	Translocation	Homozygous	P0_N2_control_hermaphrodite	12199124	X	4	0	4	0	0	rep.1	53267041	2		4
144205	X	12199120	MantaBND:2368:0:1:0:0:0:0	T	T]X:12190996]	999	PASS	SVTYPE=BND;MATEID=MantaBND:2368:0:1:0:0:0:1;CIPOS=0,4;HOMLEN=4;HOMSEQ=GATC;BND_DEPTH=44;MATE_BND_DEPTH=52	GT:FT:GQ:PL:PR:SR	1/1:PASS:105:999,108,0:0,22:0,27	Translocation	Homozygous	P0_N2_control_hermaphrodite	12190996	X	4	0	4	0	0	rep.1	53267041	2		4
144205	X	12276603	MantaINS:2377:0:0:0:6:0	TC	TTTATTTTATTAACATTTATTTATTTTATTAATTAATATTTATTTATTTAATTAATATTTATTTATTTAATTAATGTTTATTTATTTAATTAATATTTATTTAATTAATTAATATTTATTTATTTAATTAGTATTTATTTTTTTAATTAATATTTTTTAATTTAATTAATATTTATTTTATTAATTAATATTTTTTTATTTAAATAATATTTATTTATTTAATTAGTATTTATTTATTTAATTAATATTTATTTTATTAATTAATATTTATTTATTTAAATAATATTTATT	580	PASS	END=12276604;SVTYPE=INS;SVLEN=290;CIGAR=1M290I1D	GT:FT:GQ:PL:PR:SR	1/1:PASS:25:633,28,0:1,0:0,19	Insertion	Homozygous	P0_N2_control_hermaphrodite	12276604	X	0	0	0	0	0	rep.1	53267041			0
144205	X	14788284	MantaDEL:2433:0:1:0:0:0	TGCGTCCGGTTTGGGGTAGCTTTCCATGGCGGCCGACAATTTCCGAGTTTCGCCACTGACTATAAAATTGCTGATTAAGTATAGTTAGTCGAGAAACTCGGAAATTGTCGGCCGCCGTGAAAAGCTACCCCAAACCGGACACATGG	T	621	PASS	END=14788429;SVTYPE=DEL;SVLEN=-145;CIGAR=1M145D;CIPOS=0,9;HOMLEN=9;HOMSEQ=GCGTCCGGT	GT:FT:GQ:PL:PR:SR	0/1:PASS:128:671,0,125:1,0:13,16	Deletion	Heterozygous	P0_N2_control_hermaphrodite	14788429	X	9	0	9	0	0	rep.1	53267041			9
144208	I	229064	MantaBND:2:0:1:0:0:0:0	C	]IV:6006441]C	28	PASS	SVTYPE=BND;MATEID=MantaBND:2:0:1:0:0:0:1;IMPRECISE;CIPOS=-242,242;BND_DEPTH=140;MATE_BND_DEPTH=79	GT:FT:GQ:PL:PR	0/1:PASS:28:78,0,999:73,14	Translocation	Heterozygous	P0_N2_control_hermaphrodite	6006441	IV	0	-242	242	0	0	rep.2	61763449	3		242		CER12-I_CE
144208	I	238616	MantaBND:9:0:1:0:0:0:1	C	C]V:10866803]	95	PASS	SVTYPE=BND;MATEID=MantaBND:9:0:1:0:0:0:0;IMPRECISE;CIPOS=-216,216;BND_DEPTH=101;MATE_BND_DEPTH=153	GT:FT:GQ:PL:PR	0/1:PASS:95:145,0,999:93,22	Translocation	Heterozygous	P0_N2_control_hermaphrodite	10866803	V	0	-216	216	0	0	rep.2	61763449	2		216
144208	I	678691	MantaDEL:18:0:0:0:0:0	TCCATATGATCCGTCGAAGCTGAAGGATCAGAACATCAGGAGGTACCCATGTGATCATTCGGCTCTGAAAGATCAGATCATCAGGCAGAGCCTCATGTTCTTTTGGAGCTGAAGGATCAGAACATCAGGAAGAGCCTCATGATCCTTTGGATCTGAAGGATCAGACCATCAGGAGGTACCCTTACGATCCTTCTTATCTGAAAGATCAGATCATCAGAAGGTA	T	999	PASS	END=678913;SVTYPE=DEL;SVLEN=-222;CIGAR=1M222D;CIPOS=0,4;HOMLEN=4;HOMSEQ=CCAT	GT:FT:GQ:PL:PR:SR	0/1:PASS:999:999,0,999:54,7:91,31	Deletion	Heterozygous	P0_N2_control_hermaphrodite	678913	I	4	0	4	0	0	rep.2	61763449			4
144208	I	1059751	MantaINS:52:0:0:0:4:0	G	<INS>	999	PASS	END=1059751;SVTYPE=INS;CIPOS=0,11;CIEND=0,11;HOMLEN=11;HOMSEQ=GAAATGGGCGG;LEFT_SVINSSEQ=GAAATGGGCGGAGTTTTGGAGTACAAAAGCCCCGCCCATTTCTGACTAGGATTCGGGGAAATTGCTTTAAAACACGCCTATGGTACCATAGTGATCGAATTTCATAATAAAAAATTTTTAAAAAATTGTCTAAATTTTATATGATTTTTTGAAAATTGGAAAAATCTCAGTTTTCCCCCCTAATTCCTATTTTAATTACCGCCAATTGGATTTGTTCGGTGG;RIGHT_SVINSSEQ=AATAATGCAAGCGCGCTCCACCGAACCAATCCAATTGGCGGTAATTAAAATAGGAATTAGGGGGGAAAACTGA…	GT:FT:GQ:PL:PR:SR	1/1:PASS:245:999,248,0:0,14:0,74	Insertion	Homozygous	P0_N2_control_hermaphrodite	1059751	I	11	0	11	0	11	rep.2	61763449			11
144208	I	1382016	MantaINS:37:1:1:1:1:0	T	TCGGATGCTGATTTCCGTTTTTCAACAGGTTTCTTAATTTTCGTCGGTTTTTGCGTTTTTTAATGTGTGATTAAACTTTGGCAAAAACCGACGAAAATTAAGGAAACCTGTTGAAAAA	743	PASS	END=1382016;SVTYPE=INS;SVLEN=117;CIGAR=1M117I;CIPOS=0,4;HOMLEN=4;HOMSEQ=CGGA	GT:FT:GQ:PL:PR:SR	1/1:PASS:47:796,50,0:0,0:0,25	Insertion	Homozygous	P0_N2_control_hermaphrodite	1382016	I	4	0	4	0	0	rep.2	61763449			4
144208	I	2002703	MantaBND:82:0:1:0:0:0:0	C	]III:468056]C	999	PASS	SVTYPE=BND;MATEID=MantaBND:82:0:1:0:0:0:1;BND_DEPTH=93;MATE_BND_DEPTH=169	GT:FT:GQ:PL:PR:SR	0/1:PASS:999:999,0,999:61,8:92,53	Translocation	Heterozygous	P0_N2_control_hermaphrodite	468056	III	0	0	0	0	0	rep.2	61763449	3		0		PAL5A_CE	CEMUDR1
144208	I	2652464	MantaINS:100:0:0:0:2:0	A	<INS>	999	PASS	END=2652464;SVTYPE=INS;CIPOS=0,4;CIEND=0,4;HOMLEN=4;HOMSEQ=GTGG;LEFT_SVINSSEQ=GTGGTAGAAAGGTGGCAAAAAGGTGAGAGGAAGGTGGCAAAAAGGTGTACAGAAGGTGGG;RIGHT_SVINSSEQ=GCTTCCCACCTTCTGTACACCTTTTTGCCACCTTCCTCTCACCTTTTTGCCACCTTTCTACCACCTTTTTGCCGCCTAGTTATGGCCATTTTTCGCCTTCCGGCAAAAAG	GT:FT:GQ:PL:PR:SR	1/1:PASS:103:999,106,0:0,10:0,29	Insertion	Homozygous	P0_N2_control_hermaphrodite	2652464	I	4	0	4	0	4	rep.2	61763449			4
144208	I	2652464	MantaBND:100:0:1:0:0:0:1	A	A[X:466044[	999	PASS	SVTYPE=BND;MATEID=MantaBND:100:0:1:0:0:0:0;CIPOS=0,4;HOMLEN=4;HOMSEQ=GTGG;BND_DEPTH=40;MATE_BND_DEPTH=141	GT:FT:GQ:PL:PR:SR	0/1:PASS:530:999,0,527:23,9:51,37	Translocation	Heterozygous	P0_N2_control_hermaphrodite	466044	X	4	0	4	0	0	rep.2	61763449	1		4
144208	I	2652465	MantaBND:100:0:4:0:2:0:1	G	]X:466247]G	521	PASS	SVTYPE=BND;MATEID=MantaBND:100:0:4:0:2:0:0;CIPOS=0,23;HOMLEN=23;HOMSEQ=TGGGAGAAAGTAGGCACGAAATA;BND_DEPTH=40;MATE_BND_DEPTH=170	GT:FT:GQ:PL:PR:SR	0/1:PASS:521:571,0,547:29,6:30,15	Translocation	Heterozygous	P0_N2_control_hermaphrodite	466247	X	23	0	23	0	0	rep.2	61763449	3		23
144208	I	4548886	MantaBND:168:0:5:0:0:0:1	C	]IV:6470053]C	175	PASS	SVTYPE=BND;MATEID=MantaBND:168:0:5:0:0:0:0;IMPRECISE;CIPOS=-263,264;BND_DEPTH=117;MATE_BND_DEPTH=93	GT:FT:GQ:PL:PR	0/1:PASS:175:225,0,681:47,19	Translocation	Heterozygous	P0_N2_control_hermaphrodite	6470053	IV	0	-263	264	0	0	rep.2	61763449	3		264		(TTTTTA)n
144208	I	4785680	MantaINS:159:0:0:0:0:0	T	TGGGGGTAGCTATCCACGACGGCCGACAATTTCCAAGTTTCGCCACTCACTATAAAATTGCTGATTAAGTATAGTGAGTGGCGAAACTCGGAAATTGTCGGCCGCCGTGGAAACCTACCCCAAACC	681	PASS	END=4785680;SVTYPE=INS;SVLEN=125;CIGAR=1M125I	GT:FT:GQ:PL:PR:SR	1/1:PASS:63:734,66,0:0,11:0,13	Insertion	Homozygous	P0_N2_control_hermaphrodite	4785680	I	0	0	0	0	0	rep.2	61763449			0
144208	I	5185162	MantaINS:171:0:0:0:0:0	T	TATCGAAAAAATACGATCGCACAAATTTCTCATAATTTATTTTTGATCTACCTTGTTGACTAGGCTCCTCCCCTTCCTTCGAGACAGCCACAACAAAATAACAACGGCAACAAGATTGGGGCGGAGTCAAGTTCAACAGGTAGATCAAAAATTAATTATGATAAATTTGTGCGATCGTATTTTTTCGATAATA	999	PASS	END=5185162;SVTYPE=INS;SVLEN=192;CIGAR=1M192I;CIPOS=0,8;HOMLEN=8;HOMSEQ=ATCGAAAA	GT:FT:GQ:PL:PR:SR	1/1:PASS:237:999,240,0:0,22:0,71	Insertion	Homozygous	P0_N2_control_hermaphrodite	5185162	I	8	0	8	0	0	rep.2	61763449			8
144208	I	8054335	MantaBND:20:1:3:0:0:0:0	A	A[IV:8566417[	999	PASS	SVTYPE=BND;MATEID=MantaBND:20:1:3:0:0:0:1;CIPOS=0,37;HOMLEN=37;HOMSEQ=ACTCGGCATTTGGCTCTAGCTTCTTGCCCAAGTTTAG;BND_DEPTH=62;MATE_BND_DEPTH=91	GT:FT:GQ:PL:PR:SR	0/1:PASS:261:999,0,258:10,5:17,23	Translocation	Heterozygous	P0_N2_control_hermaphrodite	8566417	IV	37	0	37	0	0	rep.2	61763449	1		37
144208	I	8054358	MantaINS:20:1:1:0:2:0	C	<INS>	999	PASS	END=8054358;SVTYPE=INS;CIPOS=0,14;CIEND=0,14;HOMLEN=14;HOMSEQ=TTGCCCAAGTTTAG;LEFT_SVINSSEQ=TTGCCCAAGTTTAGCCCAAAAAATATTAACTTGGATCAGAAGCTGTCTAAACTTTGGCAAAAGTTAGACAAAACATTGGCAAAACTTGGATTCAAGCTTTACCAAAGTCTAACCCAAGTTTCACCCAACTCTTGCCAAACTTTGGCCCAAACTTTTCTTATTTCGTTTCAAACT;RIGHT_SVINSSEQ=GTTTCAAACTTGGGCCAAAGTTTGGCAAGAGTTGGGTGAAACTTGGGTTAGACTTTGGTAAAGCTTGAATCCAAGTTTTGCCAAAGTCTTGCCTAACTT	GT:FT:GQ:PL:PR:SR	1/1:PASS:101:999,104,0:0,9:0,26	Insertion	Homozygous	P0_N2_control_hermaphrodite	8054358	I	14	0	14	0	14	rep.2	61763449			14
144208	I	8454802	MantaINS:243:0:0:0:4:0	T	<INS>	999	PASS	END=8454802;SVTYPE=INS;LEFT_SVINSSEQ=TAGGTGATTGGTAGGTTAGATATTACATATAGGGGGGGGGGGGGGCATTGAAAGAATTAAATTTTAGATTTGGGTCATTTTTTATGGGTAAAAATATTTTTATATACTAAAAAACTAAAAA;RIGHT_SVINSSEQ=CAAGAACCCTCATTACGGGAACGTCGCAAAGTCAAATAGTTGGCAAAGTGGAGAGACGGCAGACATGACGTGGCACCAACCAGCGAAAACACGCAAACGGCGATGATCCGGAAATGGCAGAAAAAAACGAC	GT:FT:GQ:PL:PR:SR	1/1:PASS:151:999,154,0:0,0:0,61	Insertion	Homozygous	P0_N2_control_hermaphrodite	8454802	I	0	0	0	0	0	rep.2	61763449			0
144208	I	11511620	MantaBND:115:1:6:1:0:0:1	A	A]IV:17326123]	127	PASS	SVTYPE=BND;MATEID=MantaBND:115:1:6:1:0:0:0;IMPRECISE;CIPOS=-251,251;BND_DEPTH=83;MATE_BND_DEPTH=76	GT:FT:GQ:PL:PR	0/1:PASS:127:177,0,448:31,13	Translocation	Heterozygous	P0_N2_control_hermaphrodite	17326123	IV	0	-251	251	0	0	rep.2	61763449	2		251		HAT3_CE	PALTTAA3_CE
144208	I	11511648	MantaBND:115:1:6:0:0:0:1	G	]IV:17326045]TG	507	PASS	SVTYPE=BND;MATEID=MantaBND:115:1:6:0:0:0:0;SVINSLEN=1;SVINSSEQ=T;BND_DEPTH=76;MATE_BND_DEPTH=173	GT:FT:GQ:PL:PR:SR	0/1:PASS:507:557,0,711:16,7:50,15	Translocation	Heterozygous	P0_N2_control_hermaphrodite	17326045	IV	0	0	0	0	0	rep.2	61763449	3	T	0		CELE46A	PALTTAA3_CE
144208	I	11630121	MantaBND:315:0:3:0:0:0:0	A	A]V:2701148]	131	PASS	SVTYPE=BND;MATEID=MantaBND:315:0:3:0:0:0:1;IMPRECISE;CIPOS=-336,337;BND_DEPTH=138;MATE_BND_DEPTH=99	GT:FT:GQ:PL:PR	0/1:PASS:131:181,0,999:92,24	Translocation	Heterozygous	P0_N2_control_hermaphrodite	2701148	V	0	-336	337	0	0	rep.2	61763449	2		337			HAT1_CE
144208	I	12738722	MantaINS:350:0:0:0:0:0	A	AATCCTTATGATCCTCATCTGGGTAGCCTAGGATAAACATCGGAACGGGAGGATCTGCTTCAAAGATCTTTGGGATCCTCGGCCATACCACTTGAGCTATGAATCTTCAGAAAGATCTGTAGGATCCAGGGGCTACGATCTTCATGGCAAGCTAGGATCCTGAACTAGGTCACTCCCGCTCCTCCAGAATTTTCACTAGGAAAACCAGGTTCCGAAGATCCGTGGAATCTTATGAAGCTGCTCTTCAATCTCTTCAATCAGTATGGGTGATGCTGATGCTGAAGATCTGATAATTGACAGAGG	999	PASS	END=12738722;SVTYPE=INS;SVLEN=302;CIGAR=1M302I;CIPOS=0,19;HOMLEN=19;HOMSEQ=ATCCTTATGATCCTCATCT	GT:FT:GQ:PL:PR:SR	1/1:PASS:204:999,207,0:2,4:0,91	Insertion	Homozygous	P0_N2_control_hermaphrodite	12738722	I	19	0	19	0	0	rep.2	61763449			19
144208	I	13894627	MantaBND:384:0:1:0:0:0:1	T	T]III:4026066]	550	PASS	SVTYPE=BND;MATEID=MantaBND:384:0:1:0:0:0:0;CIPOS=0,44;HOMLEN=44;HOMSEQ=TCAACAGGTATATACAGGCACAAAAAAACAAAAATAAAAATTTT;BND_DEPTH=93;MATE_BND_DEPTH=139	GT:FT:GQ:PL:PR:SR	0/1:PASS:550:600,0,882:46,4:30,19	Translocation	Heterozygous	P0_N2_control_hermaphrodite	4026066	III	44	0	44	0	0	rep.2	61763449	2		44
144208	I	14340151	MantaBND:404:0:1:0:0:0:1	C	[V:4248555[C	999	PASS	SVTYPE=BND;MATEID=MantaBND:404:0:1:0:0:0:0;CIPOS=0,1;HOMLEN=1;HOMSEQ=G;BND_DEPTH=44;MATE_BND_DEPTH=59	GT:FT:GQ:PL:PR:SR	0/1:PASS:24:999,0,21:4,2:5,33	Translocation	Heterozygous	P0_N2_control_hermaphrodite	4248555	V	1	0	1	0	0	rep.2	61763449	4		1
144208	I	14425428	MantaDEL:409:0:0:0:0:0	CAGCAATTTTGCCTAATTTAGACTACAAACTACAGTTATTTGCAATTTGGCACAGTCTGTCTTGATTACTATAATGCAGTAGCAGTAGTCGAAATTTCAAAAAAAATCGCCAAATTCGAATTCAATTTTCTGAGAAAATTCTAATTTTCCTGTTAGATATGTTTTGGGCTCTGCTGATCTGTTGGAAAATGCAAAAAATTCGGTGAAAATCTGTTGAAAACTAGGAATTTAGACTAAATTGACGATTGGTTGAGGCTATCGGACTACAAAC	CTATATTTGGAGCTA	999	PASS	END=14425698;SVTYPE=DEL;SVLEN=-270;CIGAR=1M14I270D	GT:FT:GQ:PL:PR:SR	1/1:PASS:135:999,138,0:0,20:0,53	Deletion	Homozygous	P0_N2_control_hermaphrodite	14425698	I	0	0	0	0	0	rep.2	61763449			0
144208	II	1450588	MantaBND:452:0:1:0:1:0:1	A	A]II:1455950]	600	PASS	SVTYPE=BND;MATEID=MantaBND:452:0:1:0:1:0:0;CIPOS=0,44;HOMLEN=44;HOMSEQ=TAGATTTTTTCCGCAAGTAGATTTTTTCCGCCGGTTCAATTTTT;BND_DEPTH=113;MATE_BND_DEPTH=100	GT:FT:GQ:PL:PR:SR	0/1:PASS:551:650,0,548:23,7:38,21	Translocation	Heterozygous	P0_N2_control_hermaphrodite	1455950	II	44	0	44	0	0	rep.2	61763449	2		44
144208	II	1451520	MantaDEL:452:0:3:3:0:0	T	<DEL>	47	PASS	END=1453766;SVTYPE=DEL;SVLEN=-2246;IMPRECISE;CIPOS=-94,94;CIEND=-84,84	GT:FT:GQ:PL:PR	0/1:PASS:47:97,0,168:12,6	Deletion	Heterozygous	P0_N2_control_hermaphrodite	1453766	II	0	-94	94	-84	84	rep.2	61763449			94
144208	II	1454792	MantaDEL:452:4:4:0:0:0	CCGGTTCTATTTTTTCCGTGAGTAGATTTTTCCGCCGGTTCAATTATTCCGCCGGTTCGAGTTTTTCCGCAGATAGATTTTTTCCGCCGGTTCAATTTTTTCCGCCGGTTCTATTTTTTCCGTGAGTAGATTTTTCCGCCGGTTCAATTATTCCGCCGGTTCGAGTTTTTCCGCAGATAGATTTTTTCCGCCGGTTCAATTTTTCCGCCGGTTCG	CAGATAT	246	PASS	END=1455006;SVTYPE=DEL;SVLEN=-214;CIGAR=1M6I214D	GT:FT:GQ:PL:PR:SR	0/1:PASS:246:296,0,892:16,3:89,20	Deletion	Heterozygous	P0_N2_control_hermaphrodite	1455006	II	0	0	0	0	0	rep.2	61763449			0
144208	II	1455374	MantaBND:452:1:1:0:0:0:0	C	CGAAA]II:1456629]	999	PASS	SVTYPE=BND;MATEID=MantaBND:452:1:1:0:0:0:1;SVINSLEN=4;SVINSSEQ=GAAA;BND_DEPTH=137;MATE_BND_DEPTH=178	GT:FT:GQ:PL:PR:SR	0/1:PASS:999:999,0,999:80,5:128,41	Translocation	Heterozygous	P0_N2_control_hermaphrodite	1456629	II	0	0	0	0	0	rep.2	61763449	2	GAAA	0
144208	II	1455906	MantaBND:452:0:1:0:1:0:0	A	A]II:1450632]	600	PASS	SVTYPE=BND;MATEID=MantaBND:452:0:1:0:1:0:1;CIPOS=0,44;HOMLEN=44;HOMSEQ=AAAAATTGAACCGGCGGAAAAAATCTACTTGCGGAAAAAATCTA;BND_DEPTH=100;MATE_BND_DEPTH=113	GT:FT:GQ:PL:PR:SR	0/1:PASS:551:650,0,548:23,7:38,21	Translocation	Heterozygous	P0_N2_control_hermaphrodite	1450632	II	44	0	44	0	0	rep.2	61763449	2		44
144208	II	1456629	MantaBND:452:1:1:0:0:0:1	A	ATTTC]II:1455374]	999	PASS	SVTYPE=BND;MATEID=MantaBND:452:1:1:0:0:0:0;SVINSLEN=4;SVINSSEQ=TTTC;BND_DEPTH=178;MATE_BND_DEPTH=137	GT:FT:GQ:PL:PR:SR	0/1:PASS:999:999,0,999:80,5:128,41	Translocation	Heterozygous	P0_N2_control_hermaphrodite	1455374	II	0	0	0	0	0	rep.2	61763449	2	TTTC	0
144208	II	1659790	MantaBND:458:0:1:0:0:0:0	A	A[X:8651737[	904	PASS	SVTYPE=BND;MATEID=MantaBND:458:0:1:0:0:0:1;CIPOS=0,9;HOMLEN=9;HOMSEQ=GCATAGGCC;BND_DEPTH=57;MATE_BND_DEPTH=82	GT:FT:GQ:PL:PR:SR	0/1:PASS:573:954,0,570:30,8:31,21	Translocation	Heterozygous	P0_N2_control_hermaphrodite	8651737	X	9	0	9	0	0	rep.2	61763449	1		9
144208	II	2141116	MantaINS:468:0:0:0:2:0	A	<INS>	999	PASS	END=2141116;SVTYPE=INS;CIPOS=0,12;CIEND=0,12;HOMLEN=12;HOMSEQ=TTAACAAGGAAA;LEFT_SVINSSEQ=TTAACAAGGAAAGTAAGTCAATCTAGTCCCGGACTTTAAATCGAGACGTATGTCATTTGAAAATTTATGTTTAGACTAGATCACCACTAAAATTTCAGCGGCGGAACTCAACTCTGAACCCCTGAAATTGCCATCTGAAAGTGCTCTAGTGCATTTTTTCGCTGAATTCTAGGT;RIGHT_SVINSSEQ=CCATTTACTTGACCTAGAATTCAGCGAAAAAATGCACTAGAGCACTTTCAGATGGCAATTTCAGGGGTTCAGAGTTGAGTTCCGCCGCTGAAATTTTAGTGTTGATCTAGTCTAAACATA…	GT:FT:GQ:PL:PR:SR	1/1:PASS:231:999,234,0:0,4:0,82	Insertion	Homozygous	P0_N2_control_hermaphrodite	2141116	II	12	0	12	0	12	rep.2	61763449			12
144208	II	2141116	MantaBND:468:0:1:0:0:0:1	A	A[V:686153[	999	PASS	SVTYPE=BND;MATEID=MantaBND:468:0:1:0:0:0:0;CIPOS=0,12;HOMLEN=12;HOMSEQ=TTAACAAGGAAA;BND_DEPTH=141;MATE_BND_DEPTH=189	GT:FT:GQ:PL:PR:SR	0/1:PASS:834:999,0,831:35,13:50,46	Translocation	Heterozygous	P0_N2_control_hermaphrodite	686153	V	12	0	12	0	0	rep.2	61763449	1		12
144208	II	2818716	MantaINS:501:0:0:0:0:0	A	AGCGCTCAAAGATTGGGCGCGAGAGAGCGCGGGGAAGGGGAGACGCAGAGCGCCTCGCGCGCCTGCGTCTCCCCTTCCACCGCACTCTCTC	999	PASS	END=2818716;SVTYPE=INS;SVLEN=90;CIGAR=1M90I;CIPOS=0,4;HOMLEN=4;HOMSEQ=GCGC	GT:FT:GQ:PL:PR:SR	1/1:PASS:79:999,82,0:0,0:1,46	Insertion	Homozygous	P0_N2_control_hermaphrodite	2818716	II	4	0	4	0	0	rep.2	61763449			4
144208	II	2897567	MantaDUP:TANDEM:512:0:1:0:0:0	G	<DUP:TANDEM>	999	PASS	END=2898963;SVTYPE=DUP;SVLEN=1396;CIPOS=0,24;CIEND=0,24;HOMLEN=24;HOMSEQ=TAGTCCTAAAATTGTGATTTTTAG	GT:FT:GQ:PL:PR:SR	0/1:PASS:864:999,0,861:36,24:62,29	Tandem Duplication	Heterozygous	P0_N2_control_hermaphrodite	2898963	II	24	0	24	0	24	rep.2	61763449			24
144208	II	3159599	MantaDEL:516:0:1:0:0:0	G	<DEL>	24	PASS	END=3163354;SVTYPE=DEL;SVLEN=-3755;IMPRECISE;CIPOS=-105,105;CIEND=-70,70	GT:FT:GQ:PL:PR	0/1:PASS:24:74,0,479:32,8	Deletion	Heterozygous	P0_N2_control_hermaphrodite	3163354	II	0	-105	105	-70	70	rep.2	61763449			105
144208	II	3539921	MantaINS:526:1:1:0:0:0	G	GAATTTTCCAATTTTCTCTTTAAAAAAATACCGGAAAATTCGAAAAAATATCCGATTTTTTCGAAAAAAGTCAGATTTTTCCTTCTGTTTTTCCGACATTTTTTTAAAGAGAAAATCTGAAAATTTTGTGAAAAATAGGATATTTTTCTTTACTTTTTAAGGAAAAATATCAGATTTTCCACTA	999	PASS	END=3539921;SVTYPE=INS;SVLEN=183;CIGAR=1M183I;CIPOS=0,18;HOMLEN=18;HOMSEQ=AATTTTCCAATTTTCTCT	GT:FT:GQ:PL:PR:SR	1/1:PASS:154:999,157,0:0,1:0,64	Insertion	Homozygous	P0_N2_control_hermaphrodite	3539921	II	18	0	18	0	0	rep.2	61763449			18
144208	II	3833797	MantaINS:533:0:0:1:0:1	ACG	ATGGCTAGTTTAGGGGTGACAGGCAAACGATTTTTTCCGGCAAATCAGCAAACCGGCAATTTGCCGAATTTGCCGGAAAAAACTCAATTGCCGTCCACTCCTGTGATAGTGGATGGTTGT	999	PASS	END=3833799;SVTYPE=INS;SVLEN=119;CIGAR=1M119I2D	GT:FT:GQ:PL:PR:SR	0/1:PASS:457:999,0,454:1,4:38,61	Insertion	Heterozygous	P0_N2_control_hermaphrodite	3833799	II	0	0	0	0	0	rep.2	61763449			0
144208	II	3834811	MantaDEL:525:0:0:0:0:0	TGCATAAATGGGCATAAATGGGCCAATGAAAAGCATAAATGGGCCAATGAAT	TAAGATATAG	999	PASS	END=3834862;SVTYPE=DEL;SVLEN=-51;CIGAR=1M9I51D	GT:FT:GQ:PL:PR:SR	0/1:PASS:925:999,0,922:17,0:64,36	Deletion	Heterozygous	P0_N2_control_hermaphrodite	3834862	II	0	0	0	0	0	rep.2	61763449			0
144208	II	6163864	MantaDEL:582:0:1:0:1:0	G	<DEL>	21	PASS	END=6166863;SVTYPE=DEL;SVLEN=-2999;CIPOS=0,2;CIEND=0,2;HOMLEN=2;HOMSEQ=TC	GT:FT:GQ:PL:PR:SR	0/1:PASS:21:71,0,953:26,4:67,20	Deletion	Heterozygous	P0_N2_control_hermaphrodite	6166863	II	2	0	2	0	2	rep.2	61763449			2
144208	II	6187757	MantaBND:580:0:2:0:0:0:0	A	[X:16884759[A	999	PASS	SVTYPE=BND;MATEID=MantaBND:580:0:2:0:0:0:1;CIPOS=0,7;HOMLEN=7;HOMSEQ=TCCCGAC;BND_DEPTH=147;MATE_BND_DEPTH=163	GT:FT:GQ:PL:PR:SR	0/1:PASS:534:999,0,531:22,4:35,36	Translocation	Heterozygous	P0_N2_control_hermaphrodite	16884759	X	7	0	7	0	0	rep.2	61763449	4		7		(TCCCGATCCA)n	(CGGGATGGAT)n
144208	II	6630113	MantaDUP:TANDEM:595:0:0:1:0:0	C	<DUP:TANDEM>	999	PASS	END=6630883;SVTYPE=DUP;SVLEN=770	GT:FT:GQ:PL:PR:SR	0/1:PASS:999:999,0,999:66,49:93,49	Tandem Duplication	Heterozygous	P0_N2_control_hermaphrodite	6630883	II	0	0	0	0	0	rep.2	61763449			0
144208	II	6669184	MantaINS:600:0:0:0:6:0	T	<INS>	999	PASS	END=6669184;SVTYPE=INS;CIPOS=0,6;CIEND=0,6;HOMLEN=6;HOMSEQ=CATTTC;LEFT_SVINSSEQ=CATTTCCGATGCATTTAATATTATTCCGAATAATACCAGAGTTGGACCACCAGGATTTGTTATCCTGATTGCAAATTCGTGAGTGTTCGCCATGATCACTGTTTCAGAAATTCAATTTTCAGCGCTGATTCGGTTCCAAC;RIGHT_SVINSSEQ=CACTTGTCCCATTCCCTACTGGAAACACACTTGAGCCACTAATGACATACGGAGCTGCAACGACATCAGACAGAATAACTGCTGCTTTTTCTGTTTTTGCTAACTTTGCAAAAGAACCAGCTAC	GT:FT:GQ:PL:PR:SR	1/1:PASS:190:999,193,0:0,0:0,72	Insertion	Homozygous	P0_N2_control_hermaphrodite	6669184	II	6	0	6	0	6	rep.2	61763449			6
144208	II	7801507	MantaDEL:621:0:0:0:0:0	ATAAGACAATGCCAAAGTGATAACTTTCCTGAAGGCACATTTACTTCGCCTAATTTTTGATTTTTAAAACAAATAAATATTTACATTTTCTAATATTGATC	A	229	PASS	END=7801607;SVTYPE=DEL;SVLEN=-100;CIGAR=1M100D;CIPOS=0,100;HOMLEN=100;HOMSEQ=TAAGACAATGCCAAAGTGATAACTTTCCTGAAGGCACATTTACTTCGCCTAATTTTTGATTTTTAAAACAAATAAATATTTACATTTTCTAATATTGATC	GT:FT:GQ:PL:PR:SR	1/1:PASS:15:281,18,0:0,0:0,6	Deletion	Homozygous	P0_N2_control_hermaphrodite	7801607	II	100	0	100	0	0	rep.2	61763449			100
144208	II	10122121	MantaDUP:TANDEM:653:0:1:0:1:0	A	<DUP:TANDEM>	874	PASS	END=10122290;SVTYPE=DUP;SVLEN=169;CIPOS=0,28;CIEND=0,28;HOMLEN=28;HOMSEQ=TTCTTCCAAACCAAACACCCAATTTTTT	GT:FT:GQ:PL:PR:SR	0/1:PASS:874:924,0,999:39,5:87,32	Tandem Duplication	Heterozygous	P0_N2_control_hermaphrodite	10122290	II	28	0	28	0	28	rep.2	61763449			28
144208	II	11027622	MantaDUP:TANDEM:673:0:1:0:0:0	C	<DUP:TANDEM>	326	PASS	END=11027691;SVTYPE=DUP;SVLEN=69;SVINSLEN=3;SVINSSEQ=AGT	GT:FT:GQ:PL:PR:SR	0/1:PASS:326:376,0,551:18,3:49,20	Tandem Duplication	Heterozygous	P0_N2_control_hermaphrodite	11027691	II	0	0	0	0	0	rep.2	61763449			0
144208	II	11027640	MantaINS:673:0:0:0:0:0	C	CCGTGAAGATCGCCGTGACCGAAGCAAGGATCGGGAGGATCGTCGTGATCGCAGTAAGGATCGAGACGATCGT	999	PASS	END=11027640;SVTYPE=INS;SVLEN=72;CIGAR=1M72I;CIPOS=0,32;HOMLEN=32;HOMSEQ=CGTGAAGATCGCCGTGACCGAAGCAAGGATCG	GT:FT:GQ:PL:PR:SR	1/1:PASS:213:999,216,0:0,0:0,81	Insertion	Homozygous	P0_N2_control_hermaphrodite	11027640	II	32	0	32	0	0	rep.2	61763449			32
144208	II	11211491	MantaDUP:TANDEM:680:0:1:0:0:0	T	<DUP:TANDEM>	140	PASS	END=11212143;SVTYPE=DUP;SVLEN=652;IMPRECISE;CIPOS=-219,219;CIEND=-221,222	GT:FT:GQ:PL:PR	0/1:PASS:140:190,0,521:37,20	Tandem Duplication	Heterozygous	P0_N2_control_hermaphrodite	11212143	II	0	-219	219	-221	222	rep.2	61763449			222
144208	II	11704655	MantaINS:700:0:0:0:0:0	G	GTTTTTTCAAATGTGCCTCCGTGGAGAAAACCATCTGAAATGTTAAAAAAATTATGTTTTT	999	PASS	END=11704655;SVTYPE=INS;SVLEN=60;CIGAR=1M60I;CIPOS=0,9;HOMLEN=9;HOMSEQ=TTTTTTCAA	GT:FT:GQ:PL:PR:SR	1/1:PASS:123:999,126,0:0,0:0,64	Insertion	Homozygous	P0_N2_control_hermaphrodite	11704655	II	9	0	9	0	0	rep.2	61763449			9
144208	II	12545579	MantaBND:715:0:1:0:0:0:0	C	C[IV:4240097[	26	PASS	SVTYPE=BND;MATEID=MantaBND:715:0:1:0:0:0:1;IMPRECISE;CIPOS=-168,169;BND_DEPTH=15;MATE_BND_DEPTH=59	GT:FT:GQ:PL:PR	0/1:PASS:26:76,0,307:21,8	Translocation	Heterozygous	P0_N2_control_hermaphrodite	4240097	IV	0	-168	169	0	0	rep.2	61763449	1		169		(CTTA)n	LINE2H_CE
144208	II	13583084	MantaDUP:TANDEM:742:0:1:0:0:0	C	<DUP:TANDEM>	999	PASS	END=13583647;SVTYPE=DUP;SVLEN=563;SVINSLEN=1;SVINSSEQ=T	GT:FT:GQ:PL:PR:SR	0/1:PASS:999:999,0,999:62,29:77,41	Tandem Duplication	Heterozygous	P0_N2_control_hermaphrodite	13583647	II	0	0	0	0	0	rep.2	61763449			0
144208	II	13870622	MantaDUP:TANDEM:761:0:1:0:0:0	C	<DUP:TANDEM>	999	PASS	END=13871114;SVTYPE=DUP;SVLEN=492;CIPOS=0,30;CIEND=0,30;HOMLEN=30;HOMSEQ=GATTTTTAGGCAGTTTTTTTCACAATTTTC	GT:FT:GQ:PL:PR:SR	0/1:PASS:999:999,0,999:55,32:72,48	Tandem Duplication	Heterozygous	P0_N2_control_hermaphrodite	13871114	II	30	0	30	0	30	rep.2	61763449			30
144208	II	15049162	MantaBND:799:0:0:2:0:0:1	T	[II:15049584[T	999	PASS	SVTYPE=BND;MATEID=MantaBND:799:0:0:2:0:0:0;CIPOS=0,14;HOMLEN=14;HOMSEQ=TAGACAACTTTTTA;BND_DEPTH=102;MATE_BND_DEPTH=130	GT:FT:GQ:PL:PR:SR	0/1:PASS:999:999,0,999:48,16:75,42	Translocation	Heterozygous	P0_N2_control_hermaphrodite	15049584	II	14	0	14	0	0	rep.2	61763449	4		14
144208	II	15049557	MantaBND:799:0:0:3:0:0:0	T	T]II:15050142]	999	PASS	SVTYPE=BND;MATEID=MantaBND:799:0:0:3:0:0:1;CIPOS=0,2;HOMLEN=2;HOMSEQ=TT;BND_DEPTH=130;MATE_BND_DEPTH=105	GT:FT:GQ:PL:PR:SR	0/1:PASS:999:999,0,999:37,19:79,44	Translocation	Heterozygous	P0_N2_control_hermaphrodite	15050142	II	2	0	2	0	0	rep.2	61763449	2		2			LONGPAL3
144208	II	15049570	MantaBND:799:0:0:2:0:0:0	A	[II:15049176[A	999	PASS	SVTYPE=BND;MATEID=MantaBND:799:0:0:2:0:0:1;CIPOS=0,14;HOMLEN=14;HOMSEQ=AAAAGTTGTCTAAT;BND_DEPTH=130;MATE_BND_DEPTH=102	GT:FT:GQ:PL:PR:SR	0/1:PASS:999:999,0,999:48,16:75,42	Translocation	Heterozygous	P0_N2_control_hermaphrodite	15049176	II	14	0	14	0	0	rep.2	61763449	4		14
144208	II	15050140	MantaBND:799:0:0:3:0:0:1	A	A]II:15049559]	999	PASS	SVTYPE=BND;MATEID=MantaBND:799:0:0:3:0:0:0;CIPOS=0,2;HOMLEN=2;HOMSEQ=AA;BND_DEPTH=105;MATE_BND_DEPTH=130	GT:FT:GQ:PL:PR:SR	0/1:PASS:999:999,0,999:37,19:79,44	Translocation	Heterozygous	P0_N2_control_hermaphrodite	15049559	II	2	0	2	0	0	rep.2	61763449	2		2		LONGPAL3
144208	III	55714	MantaBND:368:3:4:0:0:0:0	A	]V:12864683]A	999	PASS	SVTYPE=BND;MATEID=MantaBND:368:3:4:0:0:0:1;BND_DEPTH=116;MATE_BND_DEPTH=62	GT:FT:GQ:PL:PR:SR	0/1:PASS:640:999,0,637:20,4:47,36	Translocation	Heterozygous	P0_N2_control_hermaphrodite	12864683	V	0	0	0	0	0	rep.2	61763449	3		0
144208	III	468056	MantaBND:82:0:1:0:0:0:1	G	G[I:2002703[	999	PASS	SVTYPE=BND;MATEID=MantaBND:82:0:1:0:0:0:0;BND_DEPTH=169;MATE_BND_DEPTH=93	GT:FT:GQ:PL:PR:SR	0/1:PASS:999:999,0,999:61,8:92,53	Translocation	Heterozygous	P0_N2_control_hermaphrodite	2002703	I	0	0	0	0	0	rep.2	61763449	1		0		CEMUDR1	PAL5A_CE
144208	III	498451	MantaDUP:TANDEM:826:0:1:0:0:0	A	<DUP:TANDEM>	999	PASS	END=498982;SVTYPE=DUP;SVLEN=531;CIPOS=0,13;CIEND=0,13;HOMLEN=13;HOMSEQ=TATTTAGCATACC	GT:FT:GQ:PL:PR:SR	0/1:PASS:999:999,0,999:60,4:125,42	Tandem Duplication	Heterozygous	P0_N2_control_hermaphrodite	498982	III	13	0	13	0	13	rep.2	61763449			13
144208	III	578532	MantaDEL:830:0:0:0:1:0	GGGTCTGCTAAATATTTTCCCATTGGTCTGCTAAATATTTAGTATACTCATT	G	385	PASS	END=578583;SVTYPE=DEL;SVLEN=-51;CIGAR=1M51D;CIPOS=0,41;HOMLEN=41;HOMSEQ=GGTCTGCTAAATATTTTCCCATTGGTCTGCTAAATATTTAG	GT:FT:GQ:PL:PR:SR	0/1:PASS:385:435,0,393:8,0:33,16	Deletion	Heterozygous	P0_N2_control_hermaphrodite	578583	III	41	0	41	0	0	rep.2	61763449			41
144208	III	639593	MantaINS:816:2:2:0:0:0	T	TAGCAGACCAACTGTGGGTCTGCTAAATATTTAGCAGACCAACTATGGGTCTGCTAAATATTTAGCAGACCAACTATGGGTCTGCTAAATATTCAGCAGACCAACTGTGGGTCTGCTAAATATTTAGCATACCTATCGTGGGTCTGCTAAATATTTAGCAGACCAACTGTGGGTCTGCTAAATATTTAGCAGACCAACTATGGGTCTGCTAGATATTCAGTAGACCAACTGTGGGTCTGCTAAATATTCAGCAGACCAACTGTGGGTCTGCTAAATATTTAGCAGACCAACTATGGGTCTGCTAGATATTC	999	PASS	END=639593;SVTYPE=INS;SVLEN=310;CIGAR=1M310I;CIPOS=0,61;HOMLEN=61;HOMSEQ=AGCAGACCAACTGTGGGTCTGCTAAATATTTAGCAGACCAACTATGGGTCTGCTAAATATT	GT:FT:GQ:PL:PR:SR	1/1:PASS:84:999,87,0:0,0:0,36	Insertion	Homozygous	P0_N2_control_hermaphrodite	639593	III	61	0	61	0	0	rep.2	61763449			61
144208	III	2261463	MantaINS:875:0:0:0:0:0	T	TAAAAATGGGGAATTAGAGTGCGAAGTTAAAGGTGGAGTAGCGTCAGTGTGGA	999	PASS	END=2261463;SVTYPE=INS;SVLEN=52;CIGAR=1M52I;CIPOS=0,2;HOMLEN=2;HOMSEQ=AA	GT:FT:GQ:PL:PR:SR	1/1:PASS:136:999,139,0:0,0:0,49	Insertion	Homozygous	P0_N2_control_hermaphrodite	2261463	III	2	0	2	0	0	rep.2	61763449			2
144208	III	2514165	MantaINS:27:12:12:0:2:0	A	<INS>	999	PASS	END=2514165;SVTYPE=INS;CIPOS=0,10;CIEND=0,10;HOMLEN=10;HOMSEQ=ACTTTTCCTC;LEFT_SVINSSEQ=ACTTTTCCTCACGAGGGACGAGGAAAAGTGGTTTCTAGGCCATGGTCGAGGGGCCGACAAGTTTCATCGGCCATTTATCTTGCTTTGTTTTCCGCCTGTTTTCTTTCGTTTTTCATCGATTTTTTTTCGTTTTTTCTTAATAAAACTGATAAATAAATATTTTTTGCAGATGCTAAAACAATTTCCAAGTAAAAAAATCATGTATTTAGTGGGCAAGCAGCGGTGAAAGTGGTCAATGCAATATGATGGATTACGGGAATACAAAAACTAAACTTTTTCTGAAACATGATACATA;RIGHT_SVINSSEQ=G…	GT:FT:GQ:PL:PR:SR	1/1:PASS:136:999,139,0:0,14:0,35	Insertion	Homozygous	P0_N2_control_hermaphrodite	2514165	III	10	0	10	0	10	rep.2	61763449			10
144208	III	3681028	MantaINS:927:0:0:0:0:0	T	TCTACATAGGCGCACAGGTAGGCATATGTAGTCTTCGCCCTTGTAGGCACACAGGTAGGCCTGTGAGTCCCCCCCCCCTGTGTGCCTACAAGGGCGAAGA	999	PASS	END=3681028;SVTYPE=INS;SVLEN=99;CIGAR=1M99I;CIPOS=0,7;HOMLEN=7;HOMSEQ=CTACATA	GT:FT:GQ:PL:PR:SR	1/1:PASS:108:999,111,0:0,0:0,44	Insertion	Homozygous	P0_N2_control_hermaphrodite	3681028	III	7	0	7	0	0	rep.2	61763449			7
144208	III	4026022	MantaBND:384:0:1:0:0:0:0	C	C]I:13894671]	550	PASS	SVTYPE=BND;MATEID=MantaBND:384:0:1:0:0:0:1;CIPOS=0,44;HOMLEN=44;HOMSEQ=AAAATTTTTATTTTTGTTTTTTTGTGCCTGTATATACCTGTTGA;BND_DEPTH=139;MATE_BND_DEPTH=93	GT:FT:GQ:PL:PR:SR	0/1:PASS:550:600,0,882:46,4:30,19	Translocation	Heterozygous	P0_N2_control_hermaphrodite	13894671	I	44	0	44	0	0	rep.2	61763449	2		44
144208	III	4670588	MantaBND:954:0:3:0:2:0:0	T	]V:20705450]T	999	PASS	SVTYPE=BND;MATEID=MantaBND:954:0:3:0:2:0:1;BND_DEPTH=57;MATE_BND_DEPTH=141	GT:FT:GQ:PL:PR:SR	0/1:PASS:445:999,0,442:1,13:44,28	Translocation	Heterozygous	P0_N2_control_hermaphrodite	20705450	V	0	0	0	0	0	rep.2	61763449	3		0
144208	III	9101367	MantaBND:1031:0:0:1:0:0:1	A	A]III:9101530]	161	PASS	SVTYPE=BND;MATEID=MantaBND:1031:0:0:1:0:0:0;IMPRECISE;CIPOS=-357,357;BND_DEPTH=103;MATE_BND_DEPTH=94	GT:FT:GQ:PL:PR	0/1:PASS:161:211,0,583:41,19	Translocation	Heterozygous	P0_N2_control_hermaphrodite	9101530	III	0	-357	357	0	0	rep.2	61763449	2		357
144208	III	9101530	MantaBND:1031:0:0:1:0:0:0	G	G]III:9101367]	161	PASS	SVTYPE=BND;MATEID=MantaBND:1031:0:0:1:0:0:1;IMPRECISE;CIPOS=-207,207;BND_DEPTH=94;MATE_BND_DEPTH=103	GT:FT:GQ:PL:PR	0/1:PASS:161:211,0,583:41,19	Translocation	Heterozygous	P0_N2_control_hermaphrodite	9101367	III	0	-207	207	0	0	rep.2	61763449	2		207
144208	III	9800835	MantaDEL:1060:0:0:0:0:0	GAATATTTAGCAGATCCATGTATGGTCTGCTAAATATTTAGCAGACCCATTTATGGTCTGCTA	G	22	PASS	END=9800897;SVTYPE=DEL;SVLEN=-62;CIGAR=1M62D;CIPOS=0,30;HOMLEN=30;HOMSEQ=AATATTTAGCAGATCCATGTATGGTCTGCT	GT:FT:GQ:PL:PR:SR	0/1:PASS:22:72,0,709:15,0:49,5	Deletion	Heterozygous	P0_N2_control_hermaphrodite	9800897	III	30	0	30	0	0	rep.2	61763449			30
144208	III	9938753	MantaINS:816:1:1:0:0:0	C	CTCTGCTAAATATTTAGCATACCCACATTGGGTCTGCTAAATATTTAGCATACCCACATTGGGTCTGCTAAATATTTAGCATACCCACCTTGGG	981	PASS	END=9938753;SVTYPE=INS;SVLEN=93;CIGAR=1M93I;CIPOS=0,55;HOMLEN=55;HOMSEQ=TCTGCTAAATATTTAGCATACCCACATTGGGTCTGCTAAATATTTAGCATACCCA	GT:FT:GQ:PL:PR:SR	1/1:PASS:73:999,76,0:0,0:0,38	Insertion	Homozygous	P0_N2_control_hermaphrodite	9938753	III	55	0	55	0	0	rep.2	61763449			55
144208	III	10226056	MantaINS:1070:0:0:0:0:0	A	AAAAACTAAAAATAAAACTAAAAATAAAACTAAAACTAAAAATAAAACTAAAAATAAAACTAAAAATAAAACT	999	PASS	END=10226056;SVTYPE=INS;SVLEN=72;CIGAR=1M72I;CIPOS=0,54;HOMLEN=54;HOMSEQ=AAAACTAAAAATAAAACTAAAAATAAAACTAAAACTAAAAATAAAACTAAAAAT	GT:FT:GQ:PL:PR:SR	1/1:PASS:120:999,123,0:0,0:0,54	Insertion	Homozygous	P0_N2_control_hermaphrodite	10226056	III	54	0	54	0	0	rep.2	61763449			54
144208	III	10557581	MantaINS:452:5:5:0:0:0	A	ACCGCAAGTAGATTCTTTCCGCCGGTTCGAAATTTTCCGCAAGTAGATTTTTCCGCCGGTAGATTTTTCCGGTGGTAGATTCTTTCCGCCGGTTCGAGTTTTT	999	PASS	END=10557581;SVTYPE=INS;SVLEN=102;CIGAR=1M102I;CIPOS=0,36;HOMLEN=36;HOMSEQ=CCGCAAGTAGATTCTTTCCGCCGGTTCGAAATTTTC	GT:FT:GQ:PL:PR:SR	1/1:PASS:256:999,259,0:0,3:0,106	Insertion	Homozygous	P0_N2_control_hermaphrodite	10557581	III	36	0	36	0	0	rep.2	61763449			36
144208	III	11114137	MantaBND:1085:0:1:0:0:0:1	C	[V:17040261[C	406	PASS	SVTYPE=BND;MATEID=MantaBND:1085:0:1:0:0:0:0;CIPOS=0,20;HOMLEN=20;HOMSEQ=CCCCTGTTTTCAAATGGAAG;BND_DEPTH=63;MATE_BND_DEPTH=50	GT:FT:GQ:PL:PR:SR	0/1:PASS:299:456,0,296:10,11:20,8	Translocation	Heterozygous	P0_N2_control_hermaphrodite	17040261	V	20	0	20	0	0	rep.2	61763449	4		20
144208	III	11114372	MantaBND:1085:2:3:0:0:0:0	T	T]V:306865]	145	PASS	SVTYPE=BND;MATEID=MantaBND:1085:2:3:0:0:0:1;CIPOS=0,65;HOMLEN=65;HOMSEQ=CGAGGTTCGCTTTTTTCACGGCCACCTCTTCCATTTGAAAACAGGGGGGAAATTAGAAACCCGTG;BND_DEPTH=82;MATE_BND_DEPTH=40	GT:FT:GQ:PL:PR:SR	0/1:PASS:145:195,0,396:23,4:10,7	Translocation	Heterozygous	P0_N2_control_hermaphrodite	306865	V	65	0	65	0	0	rep.2	61763449	2		65			PALTTAA3_CE
144208	III	11114378	MantaBND:1085:2:3:1:1:0:1	T	T[V:306874[	146	PASS	SVTYPE=BND;MATEID=MantaBND:1085:2:3:1:1:0:0;CIPOS=0,29;HOMLEN=29;HOMSEQ=TCGCTTTTTTCACGGCCACCTCTTCCATT;BND_DEPTH=82;MATE_BND_DEPTH=39	GT:FT:GQ:PL:PR:SR	0/1:PASS:146:196,0,286:4,6:29,13	Translocation	Heterozygous	P0_N2_control_hermaphrodite	306874	V	29	0	29	0	0	rep.2	61763449	1		29
144208	III	11114378	MantaBND:1085:1:3:0:0:0:1	T	T]V:17040204]	901	PASS	SVTYPE=BND;MATEID=MantaBND:1085:1:3:0:0:0:0;CIPOS=0,59;HOMLEN=59;HOMSEQ=TCGCTTTTTTCACGGCCACCTCTTCCATTTGAAAACAGGGGGGAAATTAGAAACCCGTG;BND_DEPTH=82;MATE_BND_DEPTH=37	GT:FT:GQ:PL:PR:SR	0/1:PASS:399:951,0,396:25,14:11,18	Translocation	Heterozygous	P0_N2_control_hermaphrodite	17040204	V	59	0	59	0	0	rep.2	61763449	2		59			LINE2F_CE
144208	III	12376544	MantaDUP:TANDEM:1128:0:0:3:1:0	C	<DUP:TANDEM>	242	PASS	END=12376674;SVTYPE=DUP;SVLEN=130;CIPOS=0,14;CIEND=0,14;HOMLEN=14;HOMSEQ=TAAAATTTCAAACG	GT:FT:GQ:PL:PR:SR	0/1:PASS:242:292,0,707:15,0:61,19	Tandem Duplication	Heterozygous	P0_N2_control_hermaphrodite	12376674	III	14	0	14	0	14	rep.2	61763449			14
144208	III	12376545	MantaBND:1128:0:2:1:0:0:1	T	[III:12627387[T	999	PASS	SVTYPE=BND;MATEID=MantaBND:1128:0:2:1:0:0:0;CIPOS=0,20;HOMLEN=20;HOMSEQ=AAAATTTCAAACGAAAATTC;BND_DEPTH=84;MATE_BND_DEPTH=119	GT:FT:GQ:PL:PR:SR	0/1:PASS:570:999,0,567:29,7:40,38	Translocation	Heterozygous	P0_N2_control_hermaphrodite	12627387	III	20	0	20	0	0	rep.2	61763449	4		20
144208	III	12627367	MantaBND:1128:0:2:1:0:0:0	A	[III:12376565[A	999	PASS	SVTYPE=BND;MATEID=MantaBND:1128:0:2:1:0:0:1;CIPOS=0,20;HOMLEN=20;HOMSEQ=ATTTTCGTTTGAAATTTTAA;BND_DEPTH=119;MATE_BND_DEPTH=84	GT:FT:GQ:PL:PR:SR	0/1:PASS:570:999,0,567:29,7:40,38	Translocation	Heterozygous	P0_N2_control_hermaphrodite	12376565	III	20	0	20	0	0	rep.2	61763449	4		20
144208	III	13741765	MantaBND:35:1:4:0:0:0:1	G	G[IV:16780033[	78	PASS	SVTYPE=BND;MATEID=MantaBND:35:1:4:0:0:0:0;IMPRECISE;CIPOS=-252,252;BND_DEPTH=77;MATE_BND_DEPTH=66	GT:FT:GQ:PL:PR	0/1:PASS:78:128,0,974:65,16	Translocation	Heterozygous	P0_N2_control_hermaphrodite	16780033	IV	0	-252	252	0	0	rep.2	61763449	1		252
144208	IV	1312645	MantaBND:169:1:2:0:0:0:1	G	G]X:216896]	999	PASS	SVTYPE=BND;MATEID=MantaBND:169:1:2:0:0:0:0;CIPOS=0,8;HOMLEN=8;HOMSEQ=AGATCAAC;BND_DEPTH=77;MATE_BND_DEPTH=60	GT:FT:GQ:PL:PR:SR	0/1:PASS:625:999,0,622:25,5:43,31	Translocation	Heterozygous	P0_N2_control_hermaphrodite	216896	X	8	0	8	0	0	rep.2	61763449	2		8
144208	IV	2380075	MantaBND:898:1:3:0:2:0:1	T	]X:5445]T	989	PASS	SVTYPE=BND;MATEID=MantaBND:898:1:3:0:2:0:0;CIPOS=0,26;HOMLEN=26;HOMSEQ=TTAGGGTCTCGCCGCGAAATTCAGCT;BND_DEPTH=112;MATE_BND_DEPTH=168	GT:FT:GQ:PL:PR:SR	0/1:PASS:989:999,0,999:61,8:93,29	Translocation	Heterozygous	P0_N2_control_hermaphrodite	5445	X	26	0	26	0	0	rep.2	61763449	3		26			PALTTAA2_CE
144208	IV	4240097	MantaBND:715:0:1:0:0:0:1	C	]II:12545579]C	26	PASS	SVTYPE=BND;MATEID=MantaBND:715:0:1:0:0:0:0;IMPRECISE;CIPOS=-117,118;BND_DEPTH=59;MATE_BND_DEPTH=15	GT:FT:GQ:PL:PR	0/1:PASS:26:76,0,307:21,8	Translocation	Heterozygous	P0_N2_control_hermaphrodite	12545579	II	0	-117	118	0	0	rep.2	61763449	3		118		LINE2H_CE	NPAL0A_CE
144208	IV	4816396	MantaBND:793:2:3:1:0:0:0	A	ATCGACT[V:9724732[	999	PASS	SVTYPE=BND;MATEID=MantaBND:793:2:3:1:0:0:1;SVINSLEN=6;SVINSSEQ=TCGACT;BND_DEPTH=149;MATE_BND_DEPTH=99	GT:FT:GQ:PL:PR:SR	0/1:PASS:661:999,0,658:27,26:36,43	Translocation	Heterozygous	P0_N2_control_hermaphrodite	9724732	V	0	0	0	0	0	rep.2	61763449	1	TCGACT	0		IR3_CE	CELE14B
144208	IV	4816476	MantaBND:793:2:3:0:0:0:1	T	T]V:9724693]	47	PASS	SVTYPE=BND;MATEID=MantaBND:793:2:3:0:0:0:0;IMPRECISE;CIPOS=-166,166;BND_DEPTH=59;MATE_BND_DEPTH=99	GT:FT:GQ:PL:PR	0/1:PASS:47:97,0,461:31,9	Translocation	Heterozygous	P0_N2_control_hermaphrodite	9724693	V	0	-166	166	0	0	rep.2	61763449	2		166		IR3_CE	CELE14B
144208	IV	6005733	MantaBND:9:1:2:0:0:0:0	T	[V:10866452[T	275	PASS	SVTYPE=BND;MATEID=MantaBND:9:1:2:0:0:0:1;IMPRECISE;CIPOS=-239,240;BND_DEPTH=119;MATE_BND_DEPTH=169	GT:FT:GQ:PL:PR	0/1:PASS:275:325,0,999:102,31	Translocation	Heterozygous	P0_N2_control_hermaphrodite	10866452	V	0	-239	240	0	0	rep.2	61763449	4		240
144208	IV	6006441	MantaBND:2:0:1:0:0:0:1	G	G[I:229064[	28	PASS	SVTYPE=BND;MATEID=MantaBND:2:0:1:0:0:0:0;IMPRECISE;CIPOS=-130,131;BND_DEPTH=79;MATE_BND_DEPTH=140	GT:FT:GQ:PL:PR	0/1:PASS:28:78,0,999:73,14	Translocation	Heterozygous	P0_N2_control_hermaphrodite	229064	I	0	-130	131	0	0	rep.2	61763449	1		131
144208	IV	6320432	MantaBND:1299:0:1:0:0:0:1	T	]V:4914049]TGT	999	PASS	SVTYPE=BND;MATEID=MantaBND:1299:0:1:0:0:0:0;SVINSLEN=2;SVINSSEQ=TG;BND_DEPTH=88;MATE_BND_DEPTH=89	GT:FT:GQ:PL:PR:SR	0/1:PASS:261:999,0,258:13,25:23,38	Translocation	Heterozygous	P0_N2_control_hermaphrodite	4914049	V	0	0	0	0	0	rep.2	61763449	3	TG	0		PALTA3_CE
144208	IV	6470053	MantaBND:168:0:5:0:0:0:0	T	T[I:4548886[	175	PASS	SVTYPE=BND;MATEID=MantaBND:168:0:5:0:0:0:1;IMPRECISE;CIPOS=-129,130;BND_DEPTH=93;MATE_BND_DEPTH=117	GT:FT:GQ:PL:PR	0/1:PASS:175:225,0,681:47,19	Translocation	Heterozygous	P0_N2_control_hermaphrodite	4548886	I	0	-129	130	0	0	rep.2	61763449	1		130			(TTTTAA)n
144208	IV	7485251	MantaINS:569:1:1:0:0:0	A	AGGATCCGAAAAGTATCGAACAAGTGATGACACGTCTACAAATTAGCAAACAATGGAATACACTTCGTGCTCTACTCAACTATGTTCGTTCGAATCAAATGGATTCCATGATCCGCTCGTTCCCGCTTATTTGGTTCCGTGTTTATGAAAATGCCTTGATTGAATTGAATGGTGGATCCATGGCGAATCCAGATTGGAATTACGAACAATGCGTTATGCTTCGAAAATGGACTTTGTGGGCAATGAGCAGCAATGTCGAAGGAGGACGTCAACCAAATATTGCTCGATTCCTCCGTGAAATCAATTGTCCCATCAGTGCCTCGATTATTTCTGTCCTTTCTAACTGGACTATTGATGTAAGTTCAATTTAAACAATATTTATAATCATTTAATTTACCA…	999	PASS	END=7485251;SVTYPE=INS;SVLEN=439;CIGAR=1M439I;CIPOS=0,10;HOMLEN=10;HOMSEQ=GGATCCGAAA	GT:FT:GQ:PL:PR:SR	1/1:PASS:222:999,225,0:0,3:0,88	Insertion	Homozygous	P0_N2_control_hermaphrodite	7485251	IV	10	0	10	0	0	rep.2	61763449			10
144208	IV	7595462	MantaDUP:TANDEM:1334:1:5:1:0:0	T	<DUP:TANDEM>	41	PASS	END=7598828;SVTYPE=DUP;SVLEN=3366;IMPRECISE;CIPOS=-154,154;CIEND=-237,237	GT:FT:GQ:PL:PR	0/1:PASS:41:91,0,606:41,12	Tandem Duplication	Heterozygous	P0_N2_control_hermaphrodite	7598828	IV	0	-154	154	-237	237	rep.2	61763449			237
144208	IV	8566417	MantaBND:20:1:3:0:0:0:1	A	]I:8054335]A	999	PASS	SVTYPE=BND;MATEID=MantaBND:20:1:3:0:0:0:0;CIPOS=0,37;HOMLEN=37;HOMSEQ=CTCGGCATTTGGCTCTAGCTTCTTGCCCAAGTTTAGC;BND_DEPTH=91;MATE_BND_DEPTH=62	GT:FT:GQ:PL:PR:SR	0/1:PASS:261:999,0,258:10,5:17,23	Translocation	Heterozygous	P0_N2_control_hermaphrodite	8054335	I	37	0	37	0	0	rep.2	61763449	3		37
144208	IV	9852302	MantaDUP:TANDEM:1409:0:1:0:1:0	T	<DUP:TANDEM>	682	PASS	END=9852492;SVTYPE=DUP;SVLEN=190;CIPOS=0,4;CIEND=0,4;HOMLEN=4;HOMSEQ=AAAT	GT:FT:GQ:PL:PR:SR	0/1:PASS:682:732,0,999:50,5:108,41	Tandem Duplication	Heterozygous	P0_N2_control_hermaphrodite	9852492	IV	4	0	4	0	4	rep.2	61763449			4
144208	IV	10350537	MantaBND:1404:0:0:0:0:0:0	A	[IV:10350682[A	999	PASS	SVTYPE=BND;MATEID=MantaBND:1404:0:0:0:0:0:1;BND_DEPTH=147;MATE_BND_DEPTH=175	GT:FT:GQ:PL:PR:SR	0/1:PASS:999:999,0,999:74,19:127,37	Translocation	Heterozygous	P0_N2_control_hermaphrodite	10350682	IV	0	0	0	0	0	rep.2	61763449	4		0
144208	IV	10350682	MantaBND:1404:0:0:0:0:0:1	A	[IV:10350537[A	999	PASS	SVTYPE=BND;MATEID=MantaBND:1404:0:0:0:0:0:0;BND_DEPTH=175;MATE_BND_DEPTH=147	GT:FT:GQ:PL:PR:SR	0/1:PASS:999:999,0,999:74,19:127,37	Translocation	Heterozygous	P0_N2_control_hermaphrodite	10350537	IV	0	0	0	0	0	rep.2	61763449	4		0
144208	IV	12688217	MantaINS:1472:0:0:0:0:0	A	AAAAAATACGATCGCACAAAAATAAACAACGACGCAACGACACTCCGCTGTTTTCAATCCCCGCCCACGATTTCATTTGCACTGCGGCCGCCACATTTCAGTGCAAATGAAATCGTGGCGAGGCTTAAAAATAGCGGAGTGTCGTTGCGTCGTTGTTTATTTTTGTGCGATCGTATTTTTTCTATAATAATT	999	PASS	END=12688217;SVTYPE=INS;SVLEN=191;CIGAR=1M191I;CIPOS=0,7;HOMLEN=7;HOMSEQ=AAAAATA	GT:FT:GQ:PL:PR:SR	1/1:PASS:138:999,142,0:0,15:0,38	Insertion	Homozygous	P0_N2_control_hermaphrodite	12688217	IV	7	0	7	0	0	rep.2	61763449			7
144208	IV	16571333	MantaBND:954:6:7:2:0:0:0	C	]V:17490437]C	331	PASS	SVTYPE=BND;MATEID=MantaBND:954:6:7:2:0:0:1;CIPOS=0,38;HOMLEN=38;HOMSEQ=TAGGGCTGTGCAACCGGACGTCCGGTTTTTTCGGACGT;BND_DEPTH=75;MATE_BND_DEPTH=45	GT:FT:GQ:PL:PR:SR	0/1:PASS:287:381,0,284:12,3:18,12	Translocation	Heterozygous	P0_N2_control_hermaphrodite	17490437	V	38	0	38	0	0	rep.2	61763449	3		38
144208	IV	16571432	MantaBND:954:6:7:1:0:0:0	G	G[V:17490457[	501	PASS	SVTYPE=BND;MATEID=MantaBND:954:6:7:1:0:0:1;BND_DEPTH=71;MATE_BND_DEPTH=45	GT:FT:GQ:PL:PR:SR	0/1:PASS:125:551,0,122:8,8:5,15	Translocation	Heterozygous	P0_N2_control_hermaphrodite	17490457	V	0	0	0	0	0	rep.2	61763449	1		0
144208	IV	16780033	MantaBND:35:1:4:0:0:0:0	T	]III:13741765]T	78	PASS	SVTYPE=BND;MATEID=MantaBND:35:1:4:0:0:0:1;IMPRECISE;CIPOS=-159,159;BND_DEPTH=66;MATE_BND_DEPTH=77	GT:FT:GQ:PL:PR	0/1:PASS:78:128,0,974:65,16	Translocation	Heterozygous	P0_N2_control_hermaphrodite	13741765	III	0	-159	159	0	0	rep.2	61763449	3		159
144208	IV	17326045	MantaBND:115:1:6:0:0:0:0	C	CT[I:11511648[	507	PASS	SVTYPE=BND;MATEID=MantaBND:115:1:6:0:0:0:1;SVINSLEN=1;SVINSSEQ=T;BND_DEPTH=173;MATE_BND_DEPTH=76	GT:FT:GQ:PL:PR:SR	0/1:PASS:507:557,0,711:16,7:50,15	Translocation	Heterozygous	P0_N2_control_hermaphrodite	11511648	I	0	0	0	0	0	rep.2	61763449	1	T	0		PALTTAA3_CE	CELE46A
144208	IV	17326123	MantaBND:115:1:6:1:0:0:0	G	G]I:11511620]	127	PASS	SVTYPE=BND;MATEID=MantaBND:115:1:6:1:0:0:1;IMPRECISE;CIPOS=-142,143;BND_DEPTH=76;MATE_BND_DEPTH=83	GT:FT:GQ:PL:PR	0/1:PASS:127:177,0,448:31,13	Translocation	Heterozygous	P0_N2_control_hermaphrodite	11511620	I	0	-142	143	0	0	rep.2	61763449	2		143		PALTTAA3_CE	HAT3_CE
144208	IV	17492374	MantaINS:1555:0:0:0:0:0	T	TGAGTAAAATAAACTGTAAAGCCAGAGAGTAAAAAATACGGTGAAGCCAGAGAGTAAAATAAACTGTGAAGCCAGAGAGTAAAATATACGGTGAAGCCAGA	999	PASS	END=17492374;SVTYPE=INS;SVLEN=100;CIGAR=1M100I;CIPOS=0,16;HOMLEN=16;HOMSEQ=GAGTAAAATAAACTGT	GT:FT:GQ:PL:PR:SR	1/1:PASS:115:999,118,0:0,0:0,45	Insertion	Homozygous	P0_N2_control_hermaphrodite	17492374	IV	16	0	16	0	0	rep.2	61763449			16
144208	V	226036	MantaINS:715:4:4:0:0:0	T	TGGAGCGCGGACGGGGCGCGACTAGACACGGGTTCGCGCTCCAGTCACCCTTTTTTTCGCGCTCCTTACGCGCCACGTCCGCGCTCCAATCGCGTTTGCTCCGCGCGCATTCCGAATTTGAAAAATTCTTACGAAATTTTATGGGACGCGATCAGAGCGCCAACGTGGCGCGGAAGGAGCGCGAAAAAACGTGTGACTGGAGCGCCAACCCGTAATCTAGTCGCGCCCCGTCCGCGCTCCTGGA	999	PASS	END=226036;SVTYPE=INS;SVLEN=243;CIGAR=1M243I;CIPOS=0,6;HOMLEN=6;HOMSEQ=GGAGCG	GT:FT:GQ:PL:PR:SR	1/1:PASS:175:999,178,0:0,27:0,34	Insertion	Homozygous	P0_N2_control_hermaphrodite	226036	V	6	0	6	0	0	rep.2	61763449			6
144208	V	226037	MantaBND:715:4:5:0:0:0:0	G	[V:845512[G	999	PASS	SVTYPE=BND;MATEID=MantaBND:715:4:5:0:0:0:1;CIPOS=0,16;HOMLEN=16;HOMSEQ=GAGCGATTTGCGGAGC;BND_DEPTH=85;MATE_BND_DEPTH=81	GT:FT:GQ:PL:PR:SR	0/1:PASS:595:999,0,592:23,2:33,34	Translocation	Heterozygous	P0_N2_control_hermaphrodite	845512	V	16	0	16	0	0	rep.2	61763449	4		16			NPAL0A_CE
144208	V	306800	MantaBND:1085:2:3:0:0:0:1	T	T]III:11114437]	145	PASS	SVTYPE=BND;MATEID=MantaBND:1085:2:3:0:0:0:0;CIPOS=0,65;HOMLEN=65;HOMSEQ=CACGGGTTTCTAATTTCCCCCCTGTTTTCAAATGGAAGAGGTGGCCGTGAAAAAAGCGAACCTCG;BND_DEPTH=40;MATE_BND_DEPTH=82	GT:FT:GQ:PL:PR:SR	0/1:PASS:145:195,0,396:23,4:10,7	Translocation	Heterozygous	P0_N2_control_hermaphrodite	11114437	III	65	0	65	0	0	rep.2	61763449	2		65		PALTTAA3_CE
144208	V	306874	MantaBND:1085:2:3:1:1:0:0	T	]III:11114378]T	146	PASS	SVTYPE=BND;MATEID=MantaBND:1085:2:3:1:1:0:1;CIPOS=0,29;HOMLEN=29;HOMSEQ=CGCTTTTTTCACGGCCACCTCTTCCATTC;BND_DEPTH=39;MATE_BND_DEPTH=82	GT:FT:GQ:PL:PR:SR	0/1:PASS:146:196,0,286:4,6:29,13	Translocation	Heterozygous	P0_N2_control_hermaphrodite	11114378	III	29	0	29	0	0	rep.2	61763449	3		29
144208	V	415536	MantaINS:1577:0:0:0:0:0	A	AGAAAAATGTAAAAAAATCGCATGCATTTTTTGCATTTTTCGACATTTTTCTACATTCTTCAAATGTAGAAAAATGTC	999	PASS	END=415536;SVTYPE=INS;SVLEN=77;CIGAR=1M77I;CIPOS=0,8;HOMLEN=8;HOMSEQ=GAAAAATG	GT:FT:GQ:PL:PR:SR	1/1:PASS:112:999,115,0:0,0:0,47	Insertion	Homozygous	P0_N2_control_hermaphrodite	415536	V	8	0	8	0	0	rep.2	61763449			8
144208	V	686153	MantaBND:468:0:1:0:0:0:0	T	]II:2141116]T	999	PASS	SVTYPE=BND;MATEID=MantaBND:468:0:1:0:0:0:1;CIPOS=0,12;HOMLEN=12;HOMSEQ=TAACAAGGAAAG;BND_DEPTH=189;MATE_BND_DEPTH=141	GT:FT:GQ:PL:PR:SR	0/1:PASS:834:999,0,831:35,13:50,46	Translocation	Heterozygous	P0_N2_control_hermaphrodite	2141116	II	12	0	12	0	0	rep.2	61763449	3		12
144208	V	845496	MantaBND:715:4:5:0:0:0:1	C	[V:226053[C	999	PASS	SVTYPE=BND;MATEID=MantaBND:715:4:5:0:0:0:0;CIPOS=0,16;HOMLEN=16;HOMSEQ=TCCGCAAATCGCTCCT;BND_DEPTH=81;MATE_BND_DEPTH=85	GT:FT:GQ:PL:PR:SR	0/1:PASS:595:999,0,592:23,2:33,34	Translocation	Heterozygous	P0_N2_control_hermaphrodite	226053	V	16	0	16	0	0	rep.2	61763449	4		16		NPAL0A_CE
144208	V	2600122	MantaINS:1618:0:0:0:0:0	G	GAAAAATTCGATGAATTTTTGAGAAAGTATCTGAACCAAAACAAAAAGTTATAAGCAGAATTTGCATAAAATAGTAAAACACATTATTGTGTATCATTTTACAATAAAATTAGATGTGTTTTACTATTTTATGCAACTTCTGCTTATAACTTTTTGTTTTGGTTCAGATACTTTCTC	999	PASS	END=2600122;SVTYPE=INS;SVLEN=176;CIGAR=1M176I;CIPOS=0,8;HOMLEN=8;HOMSEQ=AAAAATTC	GT:FT:GQ:PL:PR:SR	1/1:PASS:231:999,234,0:0,5:0,102	Insertion	Homozygous	P0_N2_control_hermaphrodite	2600122	V	8	0	8	0	0	rep.2	61763449			8
144208	V	2646650	MantaBND:1136:1:3:0:0:0:0	T	T[X:13479508[	58	PASS	SVTYPE=BND;MATEID=MantaBND:1136:1:3:0:0:0:1;IMPRECISE;CIPOS=-346,346;BND_DEPTH=77;MATE_BND_DEPTH=64	GT:FT:GQ:PL:PR	0/1:PASS:58:108,0,456:31,11	Translocation	Heterozygous	P0_N2_control_hermaphrodite	13479508	X	0	-346	346	0	0	rep.2	61763449	1		346		PALTTAA1_CE	HAT1_CE
144208	V	2701148	MantaBND:315:0:3:0:0:0:1	A	A]I:11630121]	131	PASS	SVTYPE=BND;MATEID=MantaBND:315:0:3:0:0:0:0;IMPRECISE;CIPOS=-190,190;BND_DEPTH=99;MATE_BND_DEPTH=138	GT:FT:GQ:PL:PR	0/1:PASS:131:181,0,999:92,24	Translocation	Heterozygous	P0_N2_control_hermaphrodite	11630121	I	0	-190	190	0	0	rep.2	61763449	2		190		HAT1_CE
144208	V	4248554	MantaBND:404:0:1:0:0:0:0	G	[I:14340152[G	999	PASS	SVTYPE=BND;MATEID=MantaBND:404:0:1:0:0:0:1;CIPOS=0,1;HOMLEN=1;HOMSEQ=T;BND_DEPTH=59;MATE_BND_DEPTH=44	GT:FT:GQ:PL:PR:SR	0/1:PASS:24:999,0,21:4,2:5,33	Translocation	Heterozygous	P0_N2_control_hermaphrodite	14340152	I	1	0	1	0	0	rep.2	61763449	4		1
144208	V	4914043	MantaINS:1299:1:1:0:2:0	T	<INS>	999	PASS	END=4914043;SVTYPE=INS;CIPOS=0,6;CIEND=0,6;HOMLEN=6;HOMSEQ=TTTTGA;LEFT_SVINSSEQ=TTTTGATGTACACTCAAAATAATAAAACTGCGTGGCGTGTACTGCAGAAAACCTGATATTTAAGCCCCGCCT;RIGHT_SVINSSEQ=GTTTAACTCGTTGTGGGCGCGGCAAGCTGTCTCCGCCCGCTGCGAGTTAAACATAGCGGCGCGCGGAACACGTAGGATGTCGGCGGCCTGATATTGGTTGGTCCCCGAATTTTTGCCTTTTCTCCGTGAGTGGACGAGAAAAAGGCGGGGCCTAAATATTAGGTTTTCTGCAGTACACGCCACGCAGTTTTATTA	GT:FT:GQ:PL:PR:SR	1/1:PASS:145:999,148,0:0,8:0,47	Insertion	Homozygous	P0_N2_control_hermaphrodite	4914043	V	6	0	6	0	6	rep.2	61763449			6
144208	V	4914049	MantaBND:1299:0:1:0:0:0:0	A	ATG[IV:6320432[	999	PASS	SVTYPE=BND;MATEID=MantaBND:1299:0:1:0:0:0:1;SVINSLEN=2;SVINSSEQ=TG;BND_DEPTH=89;MATE_BND_DEPTH=88	GT:FT:GQ:PL:PR:SR	0/1:PASS:261:999,0,258:13,25:23,38	Translocation	Heterozygous	P0_N2_control_hermaphrodite	6320432	IV	0	0	0	0	0	rep.2	61763449	1	TG	0			PALTA3_CE
144208	V	8158794	MantaINS:1764:0:0:0:3:0	A	<INS>	999	PASS	END=8158794;SVTYPE=INS;CIPOS=0,6;CIEND=0,6;HOMLEN=6;HOMSEQ=ATGATC;LEFT_SVINSSEQ=ATGATCGCTGATGACTGAAAAAAAGAAAAAAAAAGAAAAACTGAAGCCTCGATCAAACTGACCTAAATATTTGTAGGACTTTGATATTTGCTAGCATCATTTATTATTTTCATTCAAATTTATTTAAAACGTTTCAGGAATCTATGGAGACTCTATCAATGAGATGTCATGGGCAGTTGGAGAGGTTTTAGACAGTCTTGTAAATGCTGGAATTGCTGAAAATACATTGGTTATTTTAATGTCTGATCATGGACCACATGTTGAACTATGTCTAAATGGTGGATCAACAGCTGGATTGAAAGGAGGAAAGTCGAATAGT…	GT:FT:GQ:PL:PR:SR	1/1:PASS:183:999,186,0:0,4:0,69	Insertion	Homozygous	P0_N2_control_hermaphrodite	8158794	V	6	0	6	0	6	rep.2	61763449			6
144208	V	9554018	MantaBND:100:4:7:0:0:0:1	A	A]X:466278]	999	PASS	SVTYPE=BND;MATEID=MantaBND:100:4:7:0:0:0:0;CIPOS=0,36;HOMLEN=36;HOMSEQ=TTCTCGGCATTTCGTGCCTACTTTCTCCCACCTTTT;BND_DEPTH=63;MATE_BND_DEPTH=164	GT:FT:GQ:PL:PR:SR	0/1:PASS:463:999,0,460:28,29:24,34	Translocation	Heterozygous	P0_N2_control_hermaphrodite	466278	X	36	0	36	0	0	rep.2	61763449	2		36
144208	V	9554051	MantaBND:100:1:7:0:0:0:1	T	[X:466019[T	999	PASS	SVTYPE=BND;MATEID=MantaBND:100:1:7:0:0:0:0;CIPOS=0,37;HOMLEN=37;HOMSEQ=TTTCGCCTTCCGGCAAAAAGGTGGGAGAAAGAAGACG;BND_DEPTH=64;MATE_BND_DEPTH=120	GT:FT:GQ:PL:PR:SR	0/1:PASS:334:999,0,331:17,16:27,38	Translocation	Heterozygous	P0_N2_control_hermaphrodite	466019	X	37	0	37	0	0	rep.2	61763449	4		37
144208	V	9724693	MantaBND:793:2:3:0:0:0:0	C	C]IV:4816476]	47	PASS	SVTYPE=BND;MATEID=MantaBND:793:2:3:0:0:0:1;IMPRECISE;CIPOS=-292,293;BND_DEPTH=99;MATE_BND_DEPTH=59	GT:FT:GQ:PL:PR	0/1:PASS:47:97,0,461:31,9	Translocation	Heterozygous	P0_N2_control_hermaphrodite	4816476	IV	0	-292	293	0	0	rep.2	61763449	2		293		GA-rich	IR3_CE
144208	V	9724732	MantaBND:793:2:3:1:0:0:1	A	]IV:4816396]TCGACTA	999	PASS	SVTYPE=BND;MATEID=MantaBND:793:2:3:1:0:0:0;SVINSLEN=6;SVINSSEQ=TCGACT;BND_DEPTH=99;MATE_BND_DEPTH=149	GT:FT:GQ:PL:PR:SR	0/1:PASS:661:999,0,658:27,26:36,43	Translocation	Heterozygous	P0_N2_control_hermaphrodite	4816396	IV	0	0	0	0	0	rep.2	61763449	3	TCGACT	0		CELE14B	IR3_CE
144208	V	10866452	MantaBND:9:1:2:0:0:0:1	A	[IV:6005733[A	275	PASS	SVTYPE=BND;MATEID=MantaBND:9:1:2:0:0:0:0;IMPRECISE;CIPOS=-297,298;BND_DEPTH=169;MATE_BND_DEPTH=119	GT:FT:GQ:PL:PR	0/1:PASS:275:325,0,999:102,31	Translocation	Heterozygous	P0_N2_control_hermaphrodite	6005733	IV	0	-297	298	0	0	rep.2	61763449	4		298
144208	V	10866803	MantaBND:9:0:1:0:0:0:0	A	A]I:238616]	95	PASS	SVTYPE=BND;MATEID=MantaBND:9:0:1:0:0:0:1;IMPRECISE;CIPOS=-247,247;BND_DEPTH=153;MATE_BND_DEPTH=101	GT:FT:GQ:PL:PR	0/1:PASS:95:145,0,999:93,22	Translocation	Heterozygous	P0_N2_control_hermaphrodite	238616	I	0	-247	247	0	0	rep.2	61763449	2		247
144208	V	11690781	MantaINS:1829:0:0:0:0:0	A	AAAAATTTTCAATAAAAAATCAAATAAATAAATAAATAAATATGCTGATAAAAACACACAAACTATTGAATTGATATCACTGATAAAATAATAAAGAATAATCAGTCTTGATTTTTGAATAAAAATTCCAAAGCAAGACTGATTATTCTTTATTATTTTATCAGTGATATCAATTCAATAGTTTGTGTGTTTTTATCAGCATATTTATTTATTTATTTATTTGATTTTTTATTGAAAATTTTTTATTG	999	PASS	END=11690781;SVTYPE=INS;SVLEN=247;CIGAR=1M247I;CIPOS=0,8;HOMLEN=8;HOMSEQ=AAAATTTT	GT:FT:GQ:PL:PR:SR	1/1:PASS:186:999,189,0:0,3:0,69	Insertion	Homozygous	P0_N2_control_hermaphrodite	11690781	V	8	0	8	0	0	rep.2	61763449			8
144208	V	11690781	MantaINS:1825:0:0:0:0:0	A	AAAAATTTTCAATAAAAAATCAAATAAATAAATAAATAAATATGCTGATAAAAACACACAAACTATTGAATTGATATCACTGATAAAATAATAAAGAATAATCAGTCTTGCTTTGGAATTTTTATTCAAAAATCAAGACTGATTATTCTTTATTATTTTATCAGTGATATCAATTCAATAGTTTGTGTGTTTTTATCAGCATATTTATTTATTTATTTATTTGATTTTTTATTGAAAATTTTTTATTG	999	PASS	END=11690781;SVTYPE=INS;SVLEN=247;CIGAR=1M247I;CIPOS=0,8;HOMLEN=8;HOMSEQ=AAAATTTT	GT:FT:GQ:PL:PR:SR	1/1:PASS:192:999,195,0:0,4:0,69	Insertion	Homozygous	P0_N2_control_hermaphrodite	11690781	V	8	0	8	0	0	rep.2	61763449			8
144208	V	12167424	MantaINS:1824:0:0:0:0:0	C	CCCTGGTGGTCCTGGTGGTCCGGCTGGGCATGTGATGCAAGCAGAAGCAGATGAGTGTTGTTCAGCAACTCCAGCTCCTCCAGCTTGTCCATCACCTCCTGGTTCTCCTGCCTCTCCTGGAGCACCATCCTCT	999	PASS	END=12167424;SVTYPE=INS;SVLEN=132;CIGAR=1M132I;CIPOS=0,20;HOMLEN=20;HOMSEQ=CCTGGTGGTCCTGGTGGTCC	GT:FT:GQ:PL:PR:SR	1/1:PASS:259:999,262,0:0,0:0,112	Insertion	Homozygous	P0_N2_control_hermaphrodite	12167424	V	20	0	20	0	0	rep.2	61763449			20
144208	V	12864683	MantaBND:368:3:4:0:0:0:1	A	A[III:55714[	999	PASS	SVTYPE=BND;MATEID=MantaBND:368:3:4:0:0:0:0;BND_DEPTH=62;MATE_BND_DEPTH=116	GT:FT:GQ:PL:PR:SR	0/1:PASS:640:999,0,637:20,4:47,36	Translocation	Heterozygous	P0_N2_control_hermaphrodite	55714	III	0	0	0	0	0	rep.2	61763449	1		0
144208	V	13362655	MantaDUP:TANDEM:1846:0:1:0:0:0	T	<DUP:TANDEM>	999	PASS	END=13367099;SVTYPE=DUP;SVLEN=4444;CIPOS=0,2;CIEND=0,2;HOMLEN=2;HOMSEQ=AT	GT:FT:GQ:PL:PR:SR	0/1:PASS:999:999,0,999:53,34:97,40	Tandem Duplication	Heterozygous	P0_N2_control_hermaphrodite	13367099	V	2	0	2	0	2	rep.2	61763449			2
144208	V	13772497	MantaBND:1857:0:3:0:0:0:1	G	[V:13774779[G	999	PASS	SVTYPE=BND;MATEID=MantaBND:1857:0:3:0:0:0:0;CIPOS=0,1;HOMLEN=1;HOMSEQ=C;BND_DEPTH=61;MATE_BND_DEPTH=85	GT:FT:GQ:PL:PR:SR	0/1:PASS:105:999,0,102:0,12:15,37	Translocation	Heterozygous	P0_N2_control_hermaphrodite	13774779	V	1	0	1	0	0	rep.2	61763449	4		1
144208	V	13774305	MantaBND:1857:0:1:0:0:0:0	C	C]V:13782013]	999	PASS	SVTYPE=BND;MATEID=MantaBND:1857:0:1:0:0:0:1;BND_DEPTH=79;MATE_BND_DEPTH=161	GT:FT:GQ:PL:PR:SR	0/1:PASS:875:999,0,872:28,35:52,45	Translocation	Heterozygous	P0_N2_control_hermaphrodite	13782013	V	0	0	0	0	0	rep.2	61763449	2		0		(TTTGC)n
144208	V	13774778	MantaBND:1857:0:3:0:0:0:0	C	[V:13772498[C	999	PASS	SVTYPE=BND;MATEID=MantaBND:1857:0:3:0:0:0:1;CIPOS=0,1;HOMLEN=1;HOMSEQ=T;BND_DEPTH=85;MATE_BND_DEPTH=61	GT:FT:GQ:PL:PR:SR	0/1:PASS:105:999,0,102:0,12:15,37	Translocation	Heterozygous	P0_N2_control_hermaphrodite	13772498	V	1	0	1	0	0	rep.2	61763449	4		1
144208	V	13775695	MantaDEL:1859:0:1:0:0:0	A	<DEL>	999	PASS	END=13780054;SVTYPE=DEL;SVLEN=-4359	GT:FT:GQ:PL:PR:SR	1/1:PASS:213:999,216,0:0,34:0,72	Deletion	Homozygous	P0_N2_control_hermaphrodite	13780054	V	0	0	0	0	0	rep.2	61763449			0
144208	V	13782013	MantaBND:1857:0:1:0:0:0:1	T	T]V:13774305]	999	PASS	SVTYPE=BND;MATEID=MantaBND:1857:0:1:0:0:0:0;BND_DEPTH=161;MATE_BND_DEPTH=79	GT:FT:GQ:PL:PR:SR	0/1:PASS:875:999,0,872:28,35:52,45	Translocation	Heterozygous	P0_N2_control_hermaphrodite	13774305	V	0	0	0	0	0	rep.2	61763449	2		0			(TTTGC)n
144208	V	14744889	MantaINS:446:1:1:0:0:0	T	TCCACCTCCTCCTGCTGCGTAGCCTCCTCCTGACGATCCTCCTCCACCTCCACCTGACGAGTATCCTCCAGATGATGCCTGTGGACCAGCAGATTCAGGCGCCGGTGGTGGTGGGGGAGCCGATGCAGCTGCATATCCTCCTCCACCTCCTCCTGAGGGCTTAGCGTACCCTCCTCCTGACGGTCCTCCACCTCGTCCCGAAGCATATCCTCCACCTCCACCTGATGGCTTTGCGTATCCTCCACCACCTCCGCCTCCTCCTGATGCGTATCCACCACCACCTCCTCCTGATGGCTTAGGATATCCTCCGCCTGCTCCA	999	PASS	END=14744889;SVTYPE=INS;SVLEN=318;CIGAR=1M318I;CIPOS=0,13;HOMLEN=13;HOMSEQ=CCACCTCCTCCTG	GT:FT:GQ:PL:PR:SR	1/1:PASS:83:999,86,0:6,0:2,60	Insertion	Homozygous	P0_N2_control_hermaphrodite	14744889	V	13	0	13	0	0	rep.2	61763449			13
144208	V	17040145	MantaBND:1085:1:3:0:0:0:0	A	A]III:11114437]	901	PASS	SVTYPE=BND;MATEID=MantaBND:1085:1:3:0:0:0:1;CIPOS=0,59;HOMLEN=59;HOMSEQ=CACGGGTTTCTAATTTCCCCCCTGTTTTCAAATGGAAGAGGTGGCCGTGAAAAAAGCGA;BND_DEPTH=37;MATE_BND_DEPTH=82	GT:FT:GQ:PL:PR:SR	0/1:PASS:399:951,0,396:25,14:11,18	Translocation	Heterozygous	P0_N2_control_hermaphrodite	11114437	III	59	0	59	0	0	rep.2	61763449	2		59		LINE2F_CE
144208	V	17040241	MantaBND:1085:0:1:0:0:0:0	T	[III:11114157[T	406	PASS	SVTYPE=BND;MATEID=MantaBND:1085:0:1:0:0:0:1;CIPOS=0,20;HOMLEN=20;HOMSEQ=TCCATTTGAAAACAGGGGGG;BND_DEPTH=50;MATE_BND_DEPTH=63	GT:FT:GQ:PL:PR:SR	0/1:PASS:299:456,0,296:10,11:20,8	Translocation	Heterozygous	P0_N2_control_hermaphrodite	11114157	III	20	0	20	0	0	rep.2	61763449	4		20
144208	V	17490437	MantaBND:954:6:7:2:0:0:1	G	G[IV:16571333[	331	PASS	SVTYPE=BND;MATEID=MantaBND:954:6:7:2:0:0:0;CIPOS=0,38;HOMLEN=38;HOMSEQ=CTAGGGCTGTGCAACCGGACGTCCGGTTTTTTCGGACG;BND_DEPTH=45;MATE_BND_DEPTH=75	GT:FT:GQ:PL:PR:SR	0/1:PASS:287:381,0,284:12,3:18,12	Translocation	Heterozygous	P0_N2_control_hermaphrodite	16571333	IV	38	0	38	0	0	rep.2	61763449	1		38
144208	V	17490457	MantaBND:954:6:7:1:0:0:1	C	]IV:16571432]C	501	PASS	SVTYPE=BND;MATEID=MantaBND:954:6:7:1:0:0:0;BND_DEPTH=45;MATE_BND_DEPTH=71	GT:FT:GQ:PL:PR:SR	0/1:PASS:125:551,0,122:8,8:5,15	Translocation	Heterozygous	P0_N2_control_hermaphrodite	16571432	IV	0	0	0	0	0	rep.2	61763449	3		0
144208	V	18681172	MantaDEL:1938:0:0:3:3:0	CCAAAAAATTTCAAAATTCCAAAAAAATTCAAAATTTCAAAAAATTTCAAAATTCCAAAAAGTTTAAAAATTTAAAAATTCCCCAAAATTTCAAAATTTCAAAATTTTCAAACTTTCAAAAATTTCAAAATTCCAAAAAATTCAAAATTCCAAAAAATTCAAAATTCCAAAAAATTTCAGAATTCCAAAAAATTTCAAAATTCCAAAAAATTTCTAAATTTCTAAAATTTCTAAATTTCTAAAATTTCAAAATTCCAAAAAATTTAAAAAATTAAAAATTCCACAAAATTTCAAAATTCCAAGAAATTTCAAAATTCCAAGAAATTTCAAAATTCCAAAAAATTTCAAAATTCCAAAAAATTTCAAAATGTCAAAAATTTCAAAATTTAAAAAATTTCA…	C	988	PASS	END=18681741;SVTYPE=DEL;SVLEN=-569;CIGAR=1M569D;CIPOS=0,53;HOMLEN=53;HOMSEQ=CAAAAAATTTCAAAATTCCAAAAAAATTCAAAATTTCAAAAAATTTCAAAATT	GT:FT:GQ:PL:PR:SR	0/1:PASS:644:999,0,641:30,4:41,30	Deletion	Heterozygous	P0_N2_control_hermaphrodite	18681741	V	53	0	53	0	0	rep.2	61763449			53
144208	V	18681667	MantaDEL:1938:0:0:4:3:0	CCAAAAAATTTCAAAATTCAAAAAATTTCAAAAATTTCAAAAATTTCAAAAATTCTAAAAATTTCAAAATTCCTT	C	652	PASS	END=18681741;SVTYPE=DEL;SVLEN=-74;CIGAR=1M74D;CIPOS=0,18;HOMLEN=18;HOMSEQ=CAAAAAATTTCAAAATTC	GT:FT:GQ:PL:PR:SR	0/1:PASS:545:702,0,542:15,0:55,21	Deletion	Heterozygous	P0_N2_control_hermaphrodite	18681741	V	18	0	18	0	0	rep.2	61763449			18
144208	V	18682059	MantaDEL:1938:0:0:5:0:1	TAAAATTTCAAAATTCCAAAAAATTTAAAAAATTAAAAATTCCACAAAATTTCAAAATTCCAAAAAATTTCAAAATTCCACAAAATTTCAAAATTCCAAAAAATTTCTAAATTTCTAAAATTTCAAAATTCCAAAAAATTTAAAAAATTAAAAATTCCACAAAATTTCAAAATTCCAAAAAATTTCAAAATTCCAC	T	522	PASS	END=18682254;SVTYPE=DEL;SVLEN=-195;CIGAR=1M195D;CIPOS=0,24;HOMLEN=24;HOMSEQ=AAAATTTCAAAATTCCAAAAAATT	GT:FT:GQ:PL:PR:SR	0/1:PASS:522:572,0,776:31,0:84,24	Deletion	Heterozygous	P0_N2_control_hermaphrodite	18682254	V	24	0	24	0	0	rep.2	61763449			24
144208	V	18682579	MantaDEL:1996:0:0:0:0:0	AAAAAATTTCAAAATTTCTAAAATTTCAAAATTCCAAAAAATTTCAAAAATTTCAAAATTCCAAAAAATTCAAAATTCCAAAAAATTTCAGAATTCCAAAAAATTTCAAAATTCCAAAAAATTTCTAAATTTCTAAAATTTCAAAATTCCAAAAAATTTAAAAAATTAAAAATTCCACAAAATTTCAAAATTCCAAAAAATTTCAAAATTCCACAAAATTTCAAAATTCCAAAAAATTCAAAATTCCAAAAAATTTCAGAATTCCAAGAAATTTCAAAATTCCAAGAAATTTCAAAATTCCAAAAAATTTCAAAATTTTCAAAATTCCAAAAAATTTCAAAATTTCTAAAATTTCAAAATTCCAAAAAATTTAAAAATTTAAAAATTCCACAAAATTTC…	A	999	PASS	END=18683092;SVTYPE=DEL;SVLEN=-513;CIGAR=1M513D;CIPOS=0,16;HOMLEN=16;HOMSEQ=AAAAATTTCAAAATTT	GT:FT:GQ:PL:PR:SR	0/1:PASS:999:999,0,999:51,15:83,36	Deletion	Heterozygous	P0_N2_control_hermaphrodite	18683092	V	16	0	16	0	0	rep.2	61763449			16
144208	V	18683253	MantaDEL:1938:3:3:0:0:0	CAAAAAATTTCAAAATTCCAAAAAATTTCAAAATTCCAAAAAAATTCAAAATTTCA	C	774	PASS	END=18683308;SVTYPE=DEL;SVLEN=-55;CIGAR=1M55D;CIPOS=0,5;HOMLEN=5;HOMSEQ=AAAAA	GT:FT:GQ:PL:PR:SR	0/1:PASS:774:824,0,814:18,0:59,22	Deletion	Heterozygous	P0_N2_control_hermaphrodite	18683308	V	5	0	5	0	0	rep.2	61763449			5
144208	V	19877606	MantaDEL:388:1:1:1:0:0	TTTTTTTTCATCACACTTAATTAAAAAATTCATATTCTTCATGAAATTCTACACATTTCCCAATTTGGAA	TGAAT	706	PASS	END=19877675;SVTYPE=DEL;SVLEN=-69;CIGAR=1M4I69D	GT:FT:GQ:PL:PR:SR	0/1:PASS:573:756,0,570:10,0:46,22	Deletion	Heterozygous	P0_N2_control_hermaphrodite	19877675	V	0	0	0	0	0	rep.2	61763449			0
144208	V	20398647	MantaDUP:TANDEM:1981:0:1:1:1:0	A	<DUP:TANDEM>	170	PASS	END=20398856;SVTYPE=DUP;SVLEN=209;CIPOS=0,21;CIEND=0,21;HOMLEN=21;HOMSEQ=AGGTTTTTAGGGATTTTTTTT	GT:FT:GQ:PL:PR:SR	0/1:PASS:170:220,0,637:29,1:33,26	Tandem Duplication	Heterozygous	P0_N2_control_hermaphrodite	20398856	V	21	0	21	0	21	rep.2	61763449			21
144208	V	20398658	MantaINS:1981:0:0:0:0:0	GGATT	GCGATTTTTAGAAATTTTGTGGAATTTTAGAACGTTTTTAAGAGTTTTTTGTGAATTTTTGGAACTTATTGAGGTTTTTAGGGATTCTTTTTTTGCAATTTTTGCGGACTTTTTGGAGGTTTTGGGAGAAATTTTGAGCGTTTTGGAAGGTTTTTAGACGATTTTTTTTGCAAATTTTGGAGATTTTTAGTATATTTTTCAATTTTAATCGGAATTTTAGAGAGAATCAGAAGGTTTTTGGGAGTTTTTTTTGCGAATTTTTGGAACTTTCTGAGGTTTTTAGAGA	999	PASS	END=20398662;SVTYPE=INS;SVLEN=285;CIGAR=1M285I4D	GT:FT:GQ:PL:PR:SR	1/1:PASS:28:999,31,0:7,0:7,49	Insertion	Homozygous	P0_N2_control_hermaphrodite	20398662	V	0	0	0	0	0	rep.2	61763449			0
144208	V	20705450	MantaBND:954:0:3:0:2:0:1	A	A[III:4670588[	999	PASS	SVTYPE=BND;MATEID=MantaBND:954:0:3:0:2:0:0;BND_DEPTH=141;MATE_BND_DEPTH=57	GT:FT:GQ:PL:PR:SR	0/1:PASS:445:999,0,442:1,13:44,28	Translocation	Heterozygous	P0_N2_control_hermaphrodite	4670588	III	0	0	0	0	0	rep.2	61763449	1		0
144208	X	5445	MantaBND:898:1:3:0:2:0:0	T	T[IV:2380075[	989	PASS	SVTYPE=BND;MATEID=MantaBND:898:1:3:0:2:0:1;CIPOS=0,26;HOMLEN=26;HOMSEQ=TTTAGGGTCTCGCCGCGAAATTCAGC;BND_DEPTH=168;MATE_BND_DEPTH=112	GT:FT:GQ:PL:PR:SR	0/1:PASS:989:999,0,999:61,8:93,29	Translocation	Heterozygous	P0_N2_control_hermaphrodite	2380075	IV	26	0	26	0	0	rep.2	61763449	1		26		PALTTAA2_CE
144208	X	216881	MantaBND:169:1:3:1:0:0:0	G	[X:256124[G	999	PASS	SVTYPE=BND;MATEID=MantaBND:169:1:3:1:0:0:1;IMPRECISE;CIPOS=-167,168;EVENT=MantaBND:169:1:3:0:0:0:0;JUNCTION_QUAL=38;BND_DEPTH=63;MATE_BND_DEPTH=32	GT:FT:GQ:PL:PR	1/1:PASS:156:999,159,0:1,4	Translocation	Homozygous	P0_N2_control_hermaphrodite	256124	X	0	-167	168	0	0	rep.2	61763449	4		168
144208	X	216888	MantaBND:169:1:2:0:0:0:0	T	T]IV:1312653]	999	PASS	SVTYPE=BND;MATEID=MantaBND:169:1:2:0:0:0:1;CIPOS=0,8;HOMLEN=8;HOMSEQ=GTTGATCT;BND_DEPTH=60;MATE_BND_DEPTH=77	GT:FT:GQ:PL:PR:SR	0/1:PASS:625:999,0,622:25,5:43,31	Translocation	Heterozygous	P0_N2_control_hermaphrodite	1312653	IV	8	0	8	0	0	rep.2	61763449	2		8
144208	X	216891	MantaBND:169:1:3:0:0:0:1	T	T]X:256071]	999	PASS	SVTYPE=BND;MATEID=MantaBND:169:1:3:0:0:0:0;CIPOS=0,5;HOMLEN=5;HOMSEQ=GATCT;EVENT=MantaBND:169:1:3:0:0:0:0;JUNCTION_QUAL=999;BND_DEPTH=60;MATE_BND_DEPTH=46	GT:FT:GQ:PL:PR:SR	1/1:PASS:156:999,159,0:0,38:0,29	Translocation	Homozygous	P0_N2_control_hermaphrodite	256071	X	5	0	5	0	0	rep.2	61763449	2		5
144208	X	256066	MantaBND:169:1:3:0:0:0:0	G	G]X:216896]	999	PASS	SVTYPE=BND;MATEID=MantaBND:169:1:3:0:0:0:1;CIPOS=0,5;HOMLEN=5;HOMSEQ=AGATC;EVENT=MantaBND:169:1:3:0:0:0:0;JUNCTION_QUAL=999;BND_DEPTH=46;MATE_BND_DEPTH=60	GT:FT:GQ:PL:PR:SR	1/1:PASS:156:999,159,0:0,38:0,29	Translocation	Homozygous	P0_N2_control_hermaphrodite	216896	X	5	0	5	0	0	rep.2	61763449	2		5
144208	X	256124	MantaBND:169:1:3:1:0:0:1	A	[X:216881[A	999	PASS	SVTYPE=BND;MATEID=MantaBND:169:1:3:1:0:0:0;IMPRECISE;CIPOS=-206,207;EVENT=MantaBND:169:1:3:0:0:0:0;JUNCTION_QUAL=38;BND_DEPTH=32;MATE_BND_DEPTH=63	GT:FT:GQ:PL:PR	1/1:PASS:156:999,159,0:1,4	Translocation	Homozygous	P0_N2_control_hermaphrodite	216881	X	0	-206	207	0	0	rep.2	61763449	4		207
144208	X	465982	MantaBND:100:1:7:0:0:0:0	G	[V:9554088[G	999	PASS	SVTYPE=BND;MATEID=MantaBND:100:1:7:0:0:0:1;CIPOS=0,37;HOMLEN=37;HOMSEQ=TCTTCTTTCTCCCACCTTTTTGCCGGAAGGCGAAAAA;BND_DEPTH=120;MATE_BND_DEPTH=64	GT:FT:GQ:PL:PR:SR	0/1:PASS:334:999,0,331:17,16:27,38	Translocation	Heterozygous	P0_N2_control_hermaphrodite	9554088	V	37	0	37	0	0	rep.2	61763449	4		37
144208	X	466044	MantaBND:100:0:1:0:0:0:0	G	]I:2652464]G	999	PASS	SVTYPE=BND;MATEID=MantaBND:100:0:1:0:0:0:1;CIPOS=0,4;HOMLEN=4;HOMSEQ=TGGT;BND_DEPTH=141;MATE_BND_DEPTH=40	GT:FT:GQ:PL:PR:SR	0/1:PASS:530:999,0,527:23,9:51,37	Translocation	Heterozygous	P0_N2_control_hermaphrodite	2652464	I	4	0	4	0	0	rep.2	61763449	3		4
144208	X	466242	MantaBND:100:4:7:0:0:0:0	A	A]V:9554054]	999	PASS	SVTYPE=BND;MATEID=MantaBND:100:4:7:0:0:0:1;CIPOS=0,36;HOMLEN=36;HOMSEQ=AAAAGGTGGGAGAAAGTAGGCACGAAATGCCGAGAA;BND_DEPTH=164;MATE_BND_DEPTH=63	GT:FT:GQ:PL:PR:SR	0/1:PASS:463:999,0,460:28,29:24,34	Translocation	Heterozygous	P0_N2_control_hermaphrodite	9554054	V	36	0	36	0	0	rep.2	61763449	2		36
144208	X	466247	MantaBND:100:0:4:0:2:0:0	G	G[I:2652465[	521	PASS	SVTYPE=BND;MATEID=MantaBND:100:0:4:0:2:0:1;CIPOS=0,23;HOMLEN=23;HOMSEQ=GTGGGAGAAAGTAGGCACGAAAT;BND_DEPTH=170;MATE_BND_DEPTH=40	GT:FT:GQ:PL:PR:SR	0/1:PASS:521:571,0,547:29,6:30,15	Translocation	Heterozygous	P0_N2_control_hermaphrodite	2652465	I	23	0	23	0	0	rep.2	61763449	1		23
144208	X	1417312	MantaBND:2030:0:1:0:0:0:0	C	C]X:14966896]	285	PASS	SVTYPE=BND;MATEID=MantaBND:2030:0:1:0:0:0:1;CIPOS=0,31;HOMLEN=31;HOMSEQ=CTGTACAGAAAAGAGTTCCAAAACTCTTTTC;BND_DEPTH=84;MATE_BND_DEPTH=113	GT:FT:GQ:PL:PR:SR	0/1:PASS:285:335,0,999:44,1:61,23	Translocation	Heterozygous	P0_N2_control_hermaphrodite	14966896	X	31	0	31	0	0	rep.2	61763449	2		31
144208	X	1417333	MantaINS:2030:0:0:0:0:0	A	AAACTCTTTTCCTTTCCTCAGTCACCGCGTTGGGGGGTTTTTCGAAGGTACCTCTAACTTGGTGACTGAGGAAAGGAAAAGAGTTTTTG	999	PASS	END=1417333;SVTYPE=INS;SVLEN=88;CIGAR=1M88I;CIPOS=0,10;HOMLEN=10;HOMSEQ=AACTCTTTTC	GT:FT:GQ:PL:PR:SR	1/1:PASS:57:999,60,0:1,0:9,41	Insertion	Homozygous	P0_N2_control_hermaphrodite	1417333	X	10	0	10	0	0	rep.2	61763449			10
144208	X	3301753	MantaINS:2085:0:0:0:0:0	T	TGATCTAGGTTTGTTATAAAACGTGAATTTTTTTAATTTGCACGGATGATTACGGAGAATGACTGTTCTAGATAAGAAATCGAGTTTTAAAACGAGCATCTTCATAAAATTGTGAAGACATTTTGATTTCACTATGAAAGTTGGCAAAAATGAAATTTCATGTTCCTAGAAATTTATTATTAATGATATTTCTATTCTTGTTTTTTGATGTTATCTCACAAATTCAAACTGCAACATTTTCTGTTCTATCCGAGATTATGACAGAAATGAATAATCACACCTTGAGCAATCATTTTGGAATTGTACCCACTGACACAAAGTAAGTTCATGTTTGGGGGTGTTACA	999	PASS	END=3301753;SVTYPE=INS;SVLEN=344;CIGAR=1M344I;CIPOS=0,4;HOMLEN=4;HOMSEQ=GATC	GT:FT:GQ:PL:PR:SR	1/1:PASS:206:999,209,0:0,2:0,79	Insertion	Homozygous	P0_N2_control_hermaphrodite	3301753	X	4	0	4	0	0	rep.2	61763449			4
144208	X	3301825	MantaDEL:2085:0:1:0:0:0	A	<DEL>	110	PASS	END=3304377;SVTYPE=DEL;SVLEN=-2552;IMPRECISE;CIPOS=-201,202;CIEND=-134,135	GT:FT:GQ:PL:PR	0/1:PASS:110:160,0,689:46,14	Deletion	Heterozygous	P0_N2_control_hermaphrodite	3304377	X	0	-201	202	-134	135	rep.2	61763449			202
144208	X	6833298	MantaINS:20:5:5:0:0:0	T	TCTAAACTTGGGCAAAAGTTAGGCAAAACTTTGGCAAGAGTTGGGTGAAACTTGGGTTAGACTTTGGTAAAGCTTGAATCCAAGTTTTGCCAAAGTCTTGCCTAACTTTTGCCCAAGTTTAGACAGCTTCTGATCCAAGTTAATATTTTTTGGG	999	PASS	END=6833298;SVTYPE=INS;SVLEN=153;CIGAR=1M153I;CIPOS=0,14;HOMLEN=14;HOMSEQ=CTAAACTTGGGCAA	GT:FT:GQ:PL:PR:SR	1/1:PASS:39:999,42,0:0,11:7,31	Insertion	Homozygous	P0_N2_control_hermaphrodite	6833298	X	14	0	14	0	0	rep.2	61763449			14
144208	X	8412240	MantaINS:368:1:1:0:0:0	G	GTTTTCAAGAATGGGCTCATAAAACTTGTTGTCTCCGGTGGCCTATAACTCTGCGGAAAAAAATCCAATTAAAAAATGAATCACTAACGAGTTGCAGATAATGATCTAATCAACAACTTCTCAGTTGAAAACTTTTTGTCAAAAAAATTGTAGGCCGAGTTAAGAGTGCTTGAAAAAAAGCGGCAGAAAGCTTAAATGTTCCTGAAACTGTCATGTCCAAACCTCGGCCAACAATTTTTTGACAAAAAGTTTTCAACTGAGAAGTTGTTGATTAGATCATTATCTGAAACTTGTTAGTGATTCATTTTTTTGTAGGATTTTTTTCCGCGGAGATATAGGCCACCGGAGACAACAAGTTTTATGGGCCCATTCTTGAAAACTTACCATAAT	819	PASS	END=8412240;SVTYPE=INS;SVLEN=389;CIGAR=1M389I;CIPOS=0,6;HOMLEN=6;HOMSEQ=TTTTCA	GT:FT:GQ:PL:PR:SR	1/1:PASS:80:872,83,0:0,21:0,7	Insertion	Homozygous	P0_N2_control_hermaphrodite	8412240	X	6	0	6	0	0	rep.2	61763449			6
144208	X	8429683	MantaINS:2170:0:0:0:0:0	G	GCGTCCGGTCGTCCGAACCGGACGCACATGCGTCCGGTTGGGGGTAGGTTCCCACGGCGGCCGACAATTTCCGAGTTTCGCCACTCACTATACTTAATCAGTAATTTTATAGTGAGTGGCGAAACTCGGAAATTGTCGGCCGTCGTGGATAGCTACCCCCAACCGGACGCATGTGCGTCCGGTTCGGACGACCGGA	999	PASS	END=8429683;SVTYPE=INS;SVLEN=195;CIGAR=1M195I;CIPOS=0,8;HOMLEN=8;HOMSEQ=CGTCCGGT	GT:FT:GQ:PL:PR:SR	1/1:PASS:102:999,105,0:0,19:5,43	Insertion	Homozygous	P0_N2_control_hermaphrodite	8429683	X	8	0	8	0	0	rep.2	61763449			8
144208	X	8651736	MantaINS:458:1:1:0:3:0	G	<INS>	999	PASS	END=8651736;SVTYPE=INS;CIPOS=0,1;CIEND=0,1;HOMLEN=1;HOMSEQ=G;LEFT_SVINSSEQ=GGCATCGAGAGAGGGGGCATCGCGTTCTAAGGGGGCATTAGGTCAAAGGGGGCATTTGTTCGTAGGGGGCATCCGTTCAGAGG;RIGHT_SVINSSEQ=CCTCTGAACGGATGCCCCCTACGAACAAATGCCCCCTTTGACCTAATGCCCCCTTAGAACGCGATGCCCCCTCTCTCGATGCCCCCTGGGA	GT:FT:GQ:PL:PR:SR	1/1:PASS:119:999,122,0:0,6:0,38	Insertion	Homozygous	P0_N2_control_hermaphrodite	8651736	X	1	0	1	0	1	rep.2	61763449			1
144208	X	8651737	MantaBND:458:0:1:0:0:0:1	G	]II:1659790]G	904	PASS	SVTYPE=BND;MATEID=MantaBND:458:0:1:0:0:0:0;CIPOS=0,9;HOMLEN=9;HOMSEQ=CATAGGCCA;BND_DEPTH=82;MATE_BND_DEPTH=57	GT:FT:GQ:PL:PR:SR	0/1:PASS:573:954,0,570:30,8:31,21	Translocation	Heterozygous	P0_N2_control_hermaphrodite	1659790	II	9	0	9	0	0	rep.2	61763449	3		9
144208	X	12190992	MantaBND:2246:0:1:0:0:0:0	C	C]X:12199124]	999	PASS	SVTYPE=BND;MATEID=MantaBND:2246:0:1:0:0:0:1;CIPOS=0,4;HOMLEN=4;HOMSEQ=GATC;BND_DEPTH=65;MATE_BND_DEPTH=68	GT:FT:GQ:PL:PR:SR	1/1:PASS:124:999,127,0:0,22:0,40	Translocation	Homozygous	P0_N2_control_hermaphrodite	12199124	X	4	0	4	0	0	rep.2	61763449	2		4
144208	X	12199120	MantaBND:2246:0:1:0:0:0:1	T	T]X:12190996]	999	PASS	SVTYPE=BND;MATEID=MantaBND:2246:0:1:0:0:0:0;CIPOS=0,4;HOMLEN=4;HOMSEQ=GATC;BND_DEPTH=68;MATE_BND_DEPTH=65	GT:FT:GQ:PL:PR:SR	1/1:PASS:124:999,127,0:0,22:0,40	Translocation	Homozygous	P0_N2_control_hermaphrodite	12190996	X	4	0	4	0	0	rep.2	61763449	2		4
144208	X	12276603	MantaINS:228:9:9:1:2:0	TC	TTTATTTTATTAACATTTATTTATTTTATTAATTAATATTTATTTATTTAATTAATATTTATTTATTTAATTAATGTTTATTTATTTAATTAATATTTATTTAATTAATTAATATTTATTTATTTAATTAGTATTTATTTTTTTAATTAATATTTTTTAATTTAATTAATATTTATTTTATTAATTAATATTTTTTTATTTAAATAATATTTATTTATTTAATTAGTATTTATTTATTTAATTAATATTTATTTTATTAATTAATATTTATTTATTTAAATAATATTTATT	999	PASS	END=12276604;SVTYPE=INS;SVLEN=290;CIGAR=1M290I1D	GT:FT:GQ:PL:PR:SR	0/1:PASS:37:999,0,34:12,0:0,45	Insertion	Heterozygous	P0_N2_control_hermaphrodite	12276604	X	0	0	0	0	0	rep.2	61763449			0
144208	X	12276665	MantaINS:228:9:9:7:0:0	TC	TTAATTAATGTTTATTTATTTAATTAATATTTATTTAATTAATTAATATTTATTTATTTAATTAGTATTTATTTTTTTAATTAATATTTTTTAATTTAATTAATATTTATTTTATTAATTAATATTTTTTTATTTAAATAATATTTATTTATTTAATTAGTATTTATTTATTT	999	PASS	END=12276666;SVTYPE=INS;SVLEN=172;CIGAR=1M172I1D	GT:FT:GQ:PL:PR:SR	0/1:PASS:27:999,0,24:0,0:11,37	Insertion	Heterozygous	P0_N2_control_hermaphrodite	12276666	X	0	0	0	0	0	rep.2	61763449			0
144208	X	12278790	MantaDEL:228:9:9:29:0:0	CCATCGGTGATAAAGTGGTGCTTTTTGGTGCTCCATCGGTGATAAAGTGGTGCTTTTTGGTGCTCCATCGGTGCTAAATTGGTGCTAT	CTA	270	PASS	END=12278877;SVTYPE=DEL;SVLEN=-87;CIGAR=1M2I87D	GT:FT:GQ:PL:PR:SR	0/1:PASS:270:320,0,803:18,0:151,15	Deletion	Heterozygous	P0_N2_control_hermaphrodite	12278877	X	0	0	0	0	0	rep.2	61763449			0
144208	X	13479508	MantaBND:1136:1:3:0:0:0:1	T	]V:2646650]T	58	PASS	SVTYPE=BND;MATEID=MantaBND:1136:1:3:0:0:0:0;IMPRECISE;CIPOS=-164,165;BND_DEPTH=64;MATE_BND_DEPTH=77	GT:FT:GQ:PL:PR	0/1:PASS:58:108,0,456:31,11	Translocation	Heterozygous	P0_N2_control_hermaphrodite	2646650	V	0	-164	165	0	0	rep.2	61763449	3		165		HAT1_CE	PALTTAA1_CE
144208	X	14788284	MantaDEL:2286:0:1:0:0:0	TGCGTCCGGTTTGGGGTAGCTTTCCATGGCGGCCGACAATTTCCGAGTTTCGCCACTGACTATAAAATTGCTGATTAAGTATAGTTAGTCGAGAAACTCGGAAATTGTCGGCCGCCGTGAAAAGCTACCCCAAACCGGACACATGG	T	772	PASS	END=14788429;SVTYPE=DEL;SVLEN=-145;CIGAR=1M145D;CIPOS=0,9;HOMLEN=9;HOMSEQ=GCGTCCGGT	GT:FT:GQ:PL:PR:SR	0/1:PASS:702:822,0,699:20,0:57,24	Deletion	Heterozygous	P0_N2_control_hermaphrodite	14788429	X	9	0	9	0	0	rep.2	61763449			9
144208	X	14966865	MantaBND:2030:0:1:0:0:0:1	G	G]X:1417343]	285	PASS	SVTYPE=BND;MATEID=MantaBND:2030:0:1:0:0:0:0;CIPOS=0,31;HOMLEN=31;HOMSEQ=GAAAAGAGTTTTGGAACTCTTTTCTGTACAG;BND_DEPTH=113;MATE_BND_DEPTH=84	GT:FT:GQ:PL:PR:SR	0/1:PASS:285:335,0,999:44,1:61,23	Translocation	Heterozygous	P0_N2_control_hermaphrodite	1417343	X	31	0	31	0	0	rep.2	61763449	2		31
144208	X	15750402	MantaINS:368:14:14:0:2:0	G	<INS>	999	PASS	END=15750402;SVTYPE=INS;CIPOS=0,11;CIEND=0,11;HOMLEN=11;HOMSEQ=GTAAGTTTTCA;LEFT_SVINSSEQ=GTAAGTTTTCAAGAATGGGCTCATAAAACTTGTTGTCTCCAGTGGCATATAACTCTGCGGAAAAAAATCCAATAAAAAAAGAACCACTAACGAGTTGCAGATAATGATCTAATCAACAACTTCTCAGTTGAAAACTTTTTGTCAAAAAAATTGTTGGCCGAGTTAAGAGTGCTTGAAAAAAGCGGCAAAAAGCTTAAATATTCCTGAAATTCTCATGTCCAAACCTCGGCCAACAATTTTTTGACAAAAAGTTTTCAACTGAGAAGTTGTTGATTAGATCATTATCTGCAACTTGTTAGTGATTCATTTT…	GT:FT:GQ:PL:PR:SR	1/1:PASS:113:999,116,0:0,4:0,36	Insertion	Homozygous	P0_N2_control_hermaphrodite	15750402	X	11	0	11	0	11	rep.2	61763449			11
144208	X	16884752	MantaBND:580:0:2:0:0:0:1	T	[II:6187764[T	999	PASS	SVTYPE=BND;MATEID=MantaBND:580:0:2:0:0:0:0;CIPOS=0,7;HOMLEN=7;HOMSEQ=CGGGATG;BND_DEPTH=163;MATE_BND_DEPTH=147	GT:FT:GQ:PL:PR:SR	0/1:PASS:534:999,0,531:22,4:35,36	Translocation	Heterozygous	P0_N2_control_hermaphrodite	6187764	II	7	0	7	0	0	rep.2	61763449	4		7		(CGGGATGGAT)n	(TCCCGATCCA)n
144211	I	678691	MantaDEL:26:0:0:0:0:0	TCCATATGATCCGTCGAAGCTGAAGGATCAGAACATCAGGAGGTACCCATGTGATCATTCGGCTCTGAAAGATCAGATCATCAGGCAGAGCCTCATGTTCTTTTGGAGCTGAAGGATCAGAACATCAGGAAGAGCCTCATGATCCTTTGGATCTGAAGGATCAGACCATCAGGAGGTACCCTTACGATCCTTCTTATCTGAAAGATCAGATCATCAGAAGGTA	T	848	PASS	END=678913;SVTYPE=DEL;SVLEN=-222;CIGAR=1M222D;CIPOS=0,4;HOMLEN=4;HOMSEQ=CCAT	GT:FT:GQ:PL:PR:SR	0/1:PASS:848:898,0,929:35,13:67,27	Deletion	Heterozygous	P0_N2_control_hermaphrodite	678913	I	4	0	4	0	0	rep.3	55275346			4
144211	I	2295502	MantaBND:77:1:2:0:0:0:1	A	[V:1772204[A	704	PASS	SVTYPE=BND;MATEID=MantaBND:77:1:2:0:0:0:0;CIPOS=0,27;HOMLEN=27;HOMSEQ=AAGCCGAATAATTATTAGAGCGCGCTT;BND_DEPTH=101;MATE_BND_DEPTH=52	GT:FT:GQ:PL:PR:SR	0/1:PASS:514:754,0,511:26,5:28,16	Translocation	Heterozygous	P0_N2_control_hermaphrodite	1772204	V	27	0	27	0	0	rep.3	55275346	4		27		CELE14A	PALTTAA1_CE
144211	I	2652464	MantaBND:116:0:2:0:0:0:0	A	A[X:466044[	999	PASS	SVTYPE=BND;MATEID=MantaBND:116:0:2:0:0:0:1;CIPOS=0,4;HOMLEN=4;HOMSEQ=GTGG;BND_DEPTH=44;MATE_BND_DEPTH=140	GT:FT:GQ:PL:PR:SR	0/1:PASS:377:999,0,374:0,9:37,34	Translocation	Heterozygous	P0_N2_control_hermaphrodite	466044	X	4	0	4	0	0	rep.3	55275346	1		4
144211	I	2652465	MantaBND:116:0:4:0:2:0:1	G	]X:466247]G	574	PASS	SVTYPE=BND;MATEID=MantaBND:116:0:4:0:2:0:0;CIPOS=0,23;HOMLEN=23;HOMSEQ=TGGGAGAAAGTAGGCACGAAATA;BND_DEPTH=46;MATE_BND_DEPTH=167	GT:FT:GQ:PL:PR:SR	0/1:PASS:533:624,0,530:28,5:32,17	Translocation	Heterozygous	P0_N2_control_hermaphrodite	466247	X	23	0	23	0	0	rep.3	55275346	3		23
144211	I	2893748	MantaINS:105:0:0:0:3:0	T	<INS>	999	PASS	END=2893748;SVTYPE=INS;CIPOS=0,8;CIEND=0,8;HOMLEN=8;HOMSEQ=AAATGGGA;LEFT_SVINSSEQ=AAATGGGAAGTAGAGTTTGTGGGTATTTTGCTTAAATAGACTAAAACTGGTCCAAAACCACCGAATTTCATAATGAGACTTCACAAAAAATTTCCAAAAATTTTTTATGGCGGGTCAAAATTTCGAAAAAAAAAGAGTTAAATTTTGCTAAAATCTGAAATTTCGCACACTTTTCTTTGTCACAGCCCCTGGATTTTAGTTTTTCTGAAA;RIGHT_SVINSSEQ=TTTGTGAAGTCTCATTATGAAATTCGGTGGTTTTGGACCAGTTTTAGTCTATTTAAGCAAAATACCCACGAACTCTACTCTCCATTTAAAG…	GT:FT:GQ:PL:PR:SR	1/1:PASS:236:999,239,0:0,8:0,77	Insertion	Homozygous	P0_N2_control_hermaphrodite	2893748	I	8	0	8	0	8	rep.3	55275346			8
144211	I	3584985	MantaINS:148:0:0:1:0:0	A	ATTTGACTGAATTTCCTCCAAAATTAGAACTGCGACCAATCAGCGATTCGCTCCGCCAACTTCATCTGATTCGTTGAAAAGTGGGCGGAGCAAATCGCTGATTGGTCACAGTTTTCATTTTGGAGGAAATTCAGCCAAAATCGAAAAATTGTATTTTTAAAAGTTGAATTTTTCAGTCTTTCGTGATTTTTTTTTGTTTTTTCTTTTGTGGCATTTTTAATTTAAGACAAACAATAGGCTAATACGAATTTGTAAATGGGGATTTTGCTTCAAAAAAAACAAAATAATTCAAAAATTCACAAAAATCACAATAAAACTCCGAAAATATCGTAATTTTTCAAT	999	PASS	END=3584985;SVTYPE=INS;SVLEN=341;CIGAR=1M341I;CIPOS=0,16;HOMLEN=16;HOMSEQ=TTTGACTGAATTTCCT	GT:FT:GQ:PL:PR:SR	1/1:PASS:207:999,210,0:0,3:0,77	Insertion	Homozygous	P0_N2_control_hermaphrodite	3584985	I	16	0	16	0	0	rep.3	55275346			16
144211	I	4785680	MantaINS:180:0:0:0:0:0	T	TGGGGGTAGCTATCCACGACGGCCGACAATTTCCAAGTTTCGCCACTCACTATAAAATTGCTGATTAAGTATAGTGAGTGGCGAAACTCGGAAATTGTCGGCCGCCGTGGAAACCTACCCCAAACC	741	PASS	END=4785680;SVTYPE=INS;SVLEN=125;CIGAR=1M125I	GT:FT:GQ:PL:PR:SR	1/1:PASS:70:794,73,0:0,11:0,16	Insertion	Homozygous	P0_N2_control_hermaphrodite	4785680	I	0	0	0	0	0	rep.3	55275346			0
144211	I	5185162	MantaINS:186:0:0:0:0:0	T	TATCGAAAAAATACGATCGCACAAATTTCTCATAATTTATTTTTGATCTACCTTGTTGACTAGGCTCCTCCCCTTCCTTCGAGACAGCCACAACAAAATAACAACGGCAACAAGATTGGGGCGGAGTCAAGTTCAACAGGTAGATCAAAAATTAATTATGATAAATTTGTGCGATCGTATTTTTTCGATAATA	999	PASS	END=5185162;SVTYPE=INS;SVLEN=192;CIGAR=1M192I;CIPOS=0,8;HOMLEN=8;HOMSEQ=ATCGAAAA	GT:FT:GQ:PL:PR:SR	1/1:PASS:172:999,175,0:0,15:0,58	Insertion	Homozygous	P0_N2_control_hermaphrodite	5185162	I	8	0	8	0	0	rep.3	55275346			8
144211	I	6521294	MantaINS:234:0:0:0:0:0	A	AGATCGAAACAATTATTGGAAATGTATTAAATGAAATGAAATCAGAATTGCATTTAGGGGGTAGTAGTCGCATCTTTAGTCAGATTATTCAGATATAGTATGAAGTTTTTAGATAATAAATCAATTCTTTCAGACGTTTCTTGTGGAGTGGGCATCATTTATTTTGGCCAAAACGTTTTCTCACTCACACGAAAGAATAGGAACAAACTGTGCAAATCCAATAGATTCTTGTT	999	PASS	END=6521294;SVTYPE=INS;SVLEN=232;CIGAR=1M232I;CIPOS=0,5;HOMLEN=5;HOMSEQ=GATCG	GT:FT:GQ:PL:PR:SR	1/1:PASS:182:999,185,0:0,2:0,71	Insertion	Homozygous	P0_N2_control_hermaphrodite	6521294	I	5	0	5	0	0	rep.3	55275346			5
144211	I	8054335	MantaBND:22:1:4:0:0:0:0	A	A[IV:8566417[	999	PASS	SVTYPE=BND;MATEID=MantaBND:22:1:4:0:0:0:1;CIPOS=0,37;HOMLEN=37;HOMSEQ=ACTCGGCATTTGGCTCTAGCTTCTTGCCCAAGTTTAG;BND_DEPTH=57;MATE_BND_DEPTH=82	GT:FT:GQ:PL:PR:SR	0/1:PASS:320:999,0,317:12,5:23,27	Translocation	Heterozygous	P0_N2_control_hermaphrodite	8566417	IV	37	0	37	0	0	rep.3	55275346	1		37
144211	I	8054358	MantaINS:22:1:1:0:2:0	C	<INS>	999	PASS	END=8054358;SVTYPE=INS;CIPOS=0,14;CIEND=0,14;HOMLEN=14;HOMSEQ=TTGCCCAAGTTTAG;LEFT_SVINSSEQ=TTGCCCAAGTTTAGCCCAAAAAATATTAACTTGGATCAGAAGCTGTCTAAACTTTGGCAAAAGTTAGAC;RIGHT_SVINSSEQ=AGAGTTGGGTGAAACTTGGGTTAGACTTTGGTAAAGCTTGAATCCAAGTTTTGCCAAAGTCTTGCCTAACTT	GT:FT:GQ:PL:PR:SR	1/1:PASS:82:999,85,0:0,2:0,28	Insertion	Homozygous	P0_N2_control_hermaphrodite	8054358	I	14	0	14	0	14	rep.3	55275346			14
144211	I	8660489	MantaBND:303:0:0:1:1:0:0	A	ACCGC]I:8660540]	999	PASS	SVTYPE=BND;MATEID=MantaBND:303:0:0:1:1:0:1;SVINSLEN=4;SVINSSEQ=CCGC;BND_DEPTH=155;MATE_BND_DEPTH=103	GT:FT:GQ:PL:PR:SR	0/1:PASS:448:999,0,445:10,24:31,34	Translocation	Heterozygous	P0_N2_control_hermaphrodite	8660540	I	0	0	0	0	0	rep.3	55275346	2	CCGC	0
144211	I	8660540	MantaBND:303:0:0:1:1:0:1	C	CGCGG]I:8660489]	999	PASS	SVTYPE=BND;MATEID=MantaBND:303:0:0:1:1:0:0;SVINSLEN=4;SVINSSEQ=GCGG;BND_DEPTH=103;MATE_BND_DEPTH=155	GT:FT:GQ:PL:PR:SR	0/1:PASS:448:999,0,445:10,24:31,34	Translocation	Heterozygous	P0_N2_control_hermaphrodite	8660489	I	0	0	0	0	0	rep.3	55275346	2	GCGG	0
144211	I	11511661	MantaBND:105:3:8:0:0:0:1	T	T]IV:17326114]	112	PASS	SVTYPE=BND;MATEID=MantaBND:105:3:8:0:0:0:0;IMPRECISE;CIPOS=-172,172;BND_DEPTH=81;MATE_BND_DEPTH=68	GT:FT:GQ:PL:PR	0/1:PASS:112:162,0,357:25,13	Translocation	Heterozygous	P0_N2_control_hermaphrodite	17326114	IV	0	-172	172	0	0	rep.3	55275346	2		172		HAT3_CE	PALTTAA3_CE
144211	I	12738722	MantaINS:385:0:0:0:0:0	A	AATCCTTATGATCCTCATCTGGGTAGCCTAGGATAAACATCGGAACGGGAGGATCTGCTTCAAAGATCTTTGGGATCCTCGGCCATACCACTTGAGCTATGAATCTTCAGAAAGATCTGTAGGATCCAGGGGCTACGATCTTCATGGCAAGCTAGGATCCTGAACTAGGTCACTCCCGCTCCTCCAGAATTTTCACTAGGAAAACCAGGTTCCGAAGATCCGTGGAATCTTATGAAGCTGCTCTTCAATCTCTTCAATCAGTATGGGTGATGCTGATGCTGAAGATCTGATAATTGACAGAGG	999	PASS	END=12738722;SVTYPE=INS;SVLEN=302;CIGAR=1M302I;CIPOS=0,19;HOMLEN=19;HOMSEQ=ATCCTTATGATCCTCATCT	GT:FT:GQ:PL:PR:SR	1/1:PASS:148:999,151,0:0,0:0,59	Insertion	Homozygous	P0_N2_control_hermaphrodite	12738722	I	19	0	19	0	0	rep.3	55275346			19
144211	I	14279597	MantaINS:392:1:1:0:4:0	T	<INS>	999	PASS	END=14279597;SVTYPE=INS;CIPOS=0,7;CIEND=0,7;HOMLEN=7;HOMSEQ=AAGGATC;LEFT_SVINSSEQ=AAGGATCTATTCCTAAATACCTATGACGTATTTAGGAATAGATCCTTAGGAATTCACGAACAGGTTTTTAGTAGTTTCTAGTCTTAAAGGGACATGGTGCATCGGTGGGAACCTTTGACACCGTGGCGTAGTTCTTAAGTTTATAGTTTGTAGTTTTTGGTACAAGAAACCCCCATGTTAACGTGGTAAGCTACTGTAAATTTGTAATTTCGTAGTCTTAAAGGGACATGG;RIGHT_SVINSSEQ=GTTTGTAGTCTTTGAGGAACATGGTGCATCGACGGGAAATAACGAGGAACGTTTGAAGACGTGGTATAGT…	GT:FT:GQ:PL:PR:SR	1/1:PASS:136:999,139,0:0,1:0,55	Insertion	Homozygous	P0_N2_control_hermaphrodite	14279597	I	7	0	7	0	7	rep.3	55275346			7
144211	I	14425428	MantaDEL:436:0:0:0:0:0	CAGCAATTTTGCCTAATTTAGACTACAAACTACAGTTATTTGCAATTTGGCACAGTCTGTCTTGATTACTATAATGCAGTAGCAGTAGTCGAAATTTCAAAAAAAATCGCCAAATTCGAATTCAATTTTCTGAGAAAATTCTAATTTTCCTGTTAGATATGTTTTGGGCTCTGCTGATCTGTTGGAAAATGCAAAAAATTCGGTGAAAATCTGTTGAAAACTAGGAATTTAGACTAAATTGACGATTGGTTGAGGCTATCGGACTACAAAC	CTATATTTGGAGCTA	999	PASS	END=14425698;SVTYPE=DEL;SVLEN=-270;CIGAR=1M14I270D	GT:FT:GQ:PL:PR:SR	1/1:PASS:101:999,104,0:0,10:0,38	Deletion	Homozygous	P0_N2_control_hermaphrodite	14425698	I	0	0	0	0	0	rep.3	55275346			0
144211	II	1450588	MantaBND:474:0:1:0:0:0:1	A	A]II:1455950]	640	PASS	SVTYPE=BND;MATEID=MantaBND:474:0:1:0:0:0:0;CIPOS=0,44;HOMLEN=44;HOMSEQ=TAGATTTTTTCCGCAAGTAGATTTTTTCCGCCGGTTCAATTTTT;BND_DEPTH=89;MATE_BND_DEPTH=97	GT:FT:GQ:PL:PR:SR	0/1:PASS:505:690,0,502:19,12:37,14	Translocation	Heterozygous	P0_N2_control_hermaphrodite	1455950	II	44	0	44	0	0	rep.3	55275346	2		44
144211	II	1455906	MantaBND:474:0:1:0:0:0:0	A	A]II:1450632]	640	PASS	SVTYPE=BND;MATEID=MantaBND:474:0:1:0:0:0:1;CIPOS=0,44;HOMLEN=44;HOMSEQ=AAAAATTGAACCGGCGGAAAAAATCTACTTGCGGAAAAAATCTA;BND_DEPTH=97;MATE_BND_DEPTH=89	GT:FT:GQ:PL:PR:SR	0/1:PASS:505:690,0,502:19,12:37,14	Translocation	Heterozygous	P0_N2_control_hermaphrodite	1450632	II	44	0	44	0	0	rep.3	55275346	2		44
144211	II	1659665	MantaBND:493:2:3:0:0:0:0	C	C[IV:4198417[	73	PASS	SVTYPE=BND;MATEID=MantaBND:493:2:3:0:0:0:1;IMPRECISE;CIPOS=-126,127;BND_DEPTH=109;MATE_BND_DEPTH=54	GT:FT:GQ:PL:PR	0/1:PASS:73:123,0,563:38,13	Translocation	Heterozygous	P0_N2_control_hermaphrodite	4198417	IV	0	-126	127	0	0	rep.3	55275346	1		127			LONGPAL3
144211	II	1659790	MantaBND:493:1:3:0:0:0:1	A	A[X:8651737[	798	PASS	SVTYPE=BND;MATEID=MantaBND:493:1:3:0:0:0:0;CIPOS=0,9;HOMLEN=9;HOMSEQ=GCATAGGCC;BND_DEPTH=48;MATE_BND_DEPTH=70	GT:FT:GQ:PL:PR:SR	0/1:PASS:371:848,0,368:15,5:29,20	Translocation	Heterozygous	P0_N2_control_hermaphrodite	8651737	X	9	0	9	0	0	rep.3	55275346	1		9
144211	II	2141116	MantaINS:500:0:0:0:2:0	A	<INS>	999	PASS	END=2141116;SVTYPE=INS;CIPOS=0,12;CIEND=0,12;HOMLEN=12;HOMSEQ=TTAACAAGGAAA;LEFT_SVINSSEQ=TTAACAAGGAAAGTAAGTCAATCTAGTCCCGGACTTTAAATCGAGACGTATGTCATTTGAAAATTTATGTTTAGACTAGATCACCACTAAAATTTCAGCGGCGGAACTCAACTCTGAACCCCTGAAATTGCCATCTGAAAGTGCTCTAGTGCATTTTTTCGCTGAATTCTAGGT;RIGHT_SVINSSEQ=CGTCTCGATTTAAAGTCCGGGACTAGATTGACTTACTTTCCTTGTAAGGTCATTTGAGATGAGAATATAAAAATTACATACGTTATTCAATGTTTTCAG	GT:FT:GQ:PL:PR:SR	1/1:PASS:172:999,175,0:0,2:0,60	Insertion	Homozygous	P0_N2_control_hermaphrodite	2141116	II	12	0	12	0	12	rep.3	55275346			12
144211	II	2141116	MantaBND:500:0:1:0:0:0:1	A	A[V:686153[	999	PASS	SVTYPE=BND;MATEID=MantaBND:500:0:1:0:0:0:0;CIPOS=0,12;HOMLEN=12;HOMSEQ=TTAACAAGGAAA;BND_DEPTH=103;MATE_BND_DEPTH=122	GT:FT:GQ:PL:PR:SR	0/1:PASS:439:999,0,436:21,19:34,43	Translocation	Heterozygous	P0_N2_control_hermaphrodite	686153	V	12	0	12	0	0	rep.3	55275346	1		12
144211	II	2818716	MantaINS:526:0:0:0:0:0	A	AGCGCTCAAAGATTGGGCGCGAGAGAGCGCGGGGAAGGGGAGACGCAGAGCGCCTCGCGCGCCTGCGTCTCCCCTTCCACCGCACTCTCTC	999	PASS	END=2818716;SVTYPE=INS;SVLEN=90;CIGAR=1M90I;CIPOS=0,4;HOMLEN=4;HOMSEQ=GCGC	GT:FT:GQ:PL:PR:SR	1/1:PASS:77:999,80,0:0,0:0,40	Insertion	Homozygous	P0_N2_control_hermaphrodite	2818716	II	4	0	4	0	0	rep.3	55275346			4
144211	II	2897674	MantaDUP:TANDEM:524:0:1:0:0:0	T	<DUP:TANDEM>	123	PASS	END=2898730;SVTYPE=DUP;SVLEN=1056;IMPRECISE;CIPOS=-143,143;CIEND=-176,176	GT:FT:GQ:PL:PR	0/1:PASS:123:173,0,386:27,14	Tandem Duplication	Heterozygous	P0_N2_control_hermaphrodite	2898730	II	0	-143	143	-176	176	rep.3	55275346			176
144211	II	3539921	MantaINS:537:1:1:0:0:0	G	GAATTTTCCAATTTTCTCTTTAAAAAAATACCGGAAAATTCGAAAAAATATCCGATTTTTTCGAAAAAAGTCAGATTTTTCCTTCTGTTTTTCCGACATTTTTTTAAAGAGAAAATCTGAAAATTTTGTGAAAAATAGGATATTTTTCTTTACTTTTTAAGGAAAAATATCAGATTTTCCACTA	999	PASS	END=3539921;SVTYPE=INS;SVLEN=183;CIGAR=1M183I;CIPOS=0,18;HOMLEN=18;HOMSEQ=AATTTTCCAATTTTCTCT	GT:FT:GQ:PL:PR:SR	1/1:PASS:99:999,102,0:0,1:0,42	Insertion	Homozygous	P0_N2_control_hermaphrodite	3539921	II	18	0	18	0	0	rep.3	55275346			18
144211	II	3833797	MantaINS:555:0:0:1:0:1	ACG	ATGGCTAGTTTAGGGGTGACAGGCAAACGATTTTTTCCGGCAAATCAGCAAACCGGCAATTTGCCGAATTTGCCGGAAAAAACTCAATTGCCGTCCACTCCTGTGATAGTGGATGGTTGT	999	PASS	END=3833799;SVTYPE=INS;SVLEN=119;CIGAR=1M119I2D	GT:FT:GQ:PL:PR:SR	0/1:PASS:598:999,0,594:1,2:47,54	Insertion	Heterozygous	P0_N2_control_hermaphrodite	3833799	II	0	0	0	0	0	rep.3	55275346			0
144211	II	3834811	MantaDEL:565:0:0:0:0:0	TGCATAAATGGGCATAAATGGGCCAATGAAAAGCATAAATGGGCCAATGAAT	TAAGATATAG	764	PASS	END=3834862;SVTYPE=DEL;SVLEN=-51;CIGAR=1M9I51D	GT:FT:GQ:PL:PR:SR	0/1:PASS:764:814,0,899:8,0:67,26	Deletion	Heterozygous	P0_N2_control_hermaphrodite	3834862	II	0	0	0	0	0	rep.3	55275346			0
144211	II	6163864	MantaDEL:592:0:1:0:0:0	G	<DEL>	58	PASS	END=6166863;SVTYPE=DEL;SVLEN=-2999;CIPOS=0,2;CIEND=0,2;HOMLEN=2;HOMSEQ=TC	GT:FT:GQ:PL:PR:SR	0/1:PASS:58:108,0,851:27,6:62,14	Deletion	Heterozygous	P0_N2_control_hermaphrodite	6166863	II	2	0	2	0	2	rep.3	55275346			2
144211	II	6187757	MantaBND:602:0:2:0:0:0:0	A	[X:16884759[A	999	PASS	SVTYPE=BND;MATEID=MantaBND:602:0:2:0:0:0:1;CIPOS=0,7;HOMLEN=7;HOMSEQ=TCCCGAC;BND_DEPTH=116;MATE_BND_DEPTH=153	GT:FT:GQ:PL:PR:SR	0/1:PASS:610:999,0,607:27,5:40,44	Translocation	Heterozygous	P0_N2_control_hermaphrodite	16884759	X	7	0	7	0	0	rep.3	55275346	4		7		(TCCCGATCCA)n	(CGGGATGGAT)n
144211	II	6630113	MantaDUP:TANDEM:615:0:1:0:0:0	C	<DUP:TANDEM>	999	PASS	END=6630883;SVTYPE=DUP;SVLEN=770	GT:FT:GQ:PL:PR:SR	0/1:PASS:999:999,0,999:41,21:85,27	Tandem Duplication	Heterozygous	P0_N2_control_hermaphrodite	6630883	II	0	0	0	0	0	rep.3	55275346			0
144211	II	6669184	MantaINS:618:0:0:0:5:0	T	<INS>	999	PASS	END=6669184;SVTYPE=INS;CIPOS=0,6;CIEND=0,6;HOMLEN=6;HOMSEQ=CATTTC;LEFT_SVINSSEQ=CATTTCCGATGCATTTAATATTATTCCGAATAATACCAGAGTTGGACCACCAGGATTTGTTATCCTGATTGCAAATTCGTGAGTGTTCGCCATGATCACTGTTTCAGAAATTCAATTTTCAGCGCTGATTCGGTTCCAACTTCTGTGAATTCCGCTGTGAATTTGAA;RIGHT_SVINSSEQ=GCTCTCACTTGTCCCATTCCCTACTGGAAACACACTTGAGCCACTAATGACATACGGAGCTGCAACGACATCAGACAGAATAACTGCTGCTTTTTCTGTTTTTGCTAACTTTGCAAAAGAACCAGCTAC	GT:FT:GQ:PL:PR:SR	1/1:PASS:226:999,229,0:0,1:0,90	Insertion	Homozygous	P0_N2_control_hermaphrodite	6669184	II	6	0	6	0	6	rep.3	55275346			6
144211	II	7801507	MantaDEL:648:0:0:0:0:0	ATAAGACAATGCCAAAGTGATAACTTTCCTGAAGGCACATTTACTTCGCCTAATTTTTGATTTTTAAAACAAATAAATATTTACATTTTCTAATATTGATC	A	287	PASS	END=7801607;SVTYPE=DEL;SVLEN=-100;CIGAR=1M100D;CIPOS=0,100;HOMLEN=100;HOMSEQ=TAAGACAATGCCAAAGTGATAACTTTCCTGAAGGCACATTTACTTCGCCTAATTTTTGATTTTTAAAACAAATAAATATTTACATTTTCTAATATTGATC	GT:FT:GQ:PL:PR:SR	1/1:PASS:21:340,24,0:0,0:0,8	Deletion	Homozygous	P0_N2_control_hermaphrodite	7801607	II	100	0	100	0	0	rep.3	55275346			100
144211	II	10122121	MantaDUP:TANDEM:699:0:1:0:0:0	A	<DUP:TANDEM>	856	PASS	END=10122290;SVTYPE=DUP;SVLEN=169;CIPOS=0,28;CIEND=0,28;HOMLEN=28;HOMSEQ=TTCTTCCAAACCAAACACCCAATTTTTT	GT:FT:GQ:PL:PR:SR	0/1:PASS:856:906,0,999:28,9:81,46	Tandem Duplication	Heterozygous	P0_N2_control_hermaphrodite	10122290	II	28	0	28	0	28	rep.3	55275346			28
144211	II	11027622	MantaDUP:TANDEM:716:0:1:0:0:0	C	<DUP:TANDEM>	631	PASS	END=11027691;SVTYPE=DUP;SVLEN=69;SVINSLEN=3;SVINSSEQ=AGT	GT:FT:GQ:PL:PR:SR	0/1:PASS:414:681,0,411:11,7:40,24	Tandem Duplication	Heterozygous	P0_N2_control_hermaphrodite	11027691	II	0	0	0	0	0	rep.3	55275346			0
144211	II	11027640	MantaINS:716:0:0:0:0:0	C	CCGTGAAGATCGCCGTGACCGAAGCAAGGATCGGGAGGATCGTCGTGATCGCAGTAAGGATCGAGACGATCGT	999	PASS	END=11027640;SVTYPE=INS;SVLEN=72;CIGAR=1M72I;CIPOS=0,32;HOMLEN=32;HOMSEQ=CGTGAAGATCGCCGTGACCGAAGCAAGGATCG	GT:FT:GQ:PL:PR:SR	1/1:PASS:192:999,195,0:0,0:0,82	Insertion	Homozygous	P0_N2_control_hermaphrodite	11027640	II	32	0	32	0	0	rep.3	55275346			32
144211	II	11211534	MantaDUP:TANDEM:721:0:0:0:0:0	A	<DUP:TANDEM>	154	PASS	END=11212119;SVTYPE=DUP;SVLEN=585;IMPRECISE;CIPOS=-222,223;CIEND=-202,203	GT:FT:GQ:PL:PR	0/1:PASS:154:204,0,446:32,19	Tandem Duplication	Heterozygous	P0_N2_control_hermaphrodite	11212119	II	0	-222	223	-202	203	rep.3	55275346			223
144211	II	11530043	MantaBND:739:3:4:0:0:0:1	G	[III:2496712[G	58	PASS	SVTYPE=BND;MATEID=MantaBND:739:3:4:0:0:0:0;IMPRECISE;CIPOS=-131,132;BND_DEPTH=151;MATE_BND_DEPTH=78	GT:FT:GQ:PL:PR	0/1:PASS:58:108,0,562:38,13	Translocation	Heterozygous	P0_N2_control_hermaphrodite	2496712	III	0	-131	132	0	0	rep.3	55275346	4		132		LONGPAL2
144211	II	11704655	MantaINS:751:0:0:0:0:0	G	GTTTTTTCAAATGTGCCTCCGTGGAGAAAACCATCTGAAATGTTAAAAAAATTATGTTTTT	999	PASS	END=11704655;SVTYPE=INS;SVLEN=60;CIGAR=1M60I;CIPOS=0,9;HOMLEN=9;HOMSEQ=TTTTTTCAA	GT:FT:GQ:PL:PR:SR	1/1:PASS:126:999,129,0:0,0:0,61	Insertion	Homozygous	P0_N2_control_hermaphrodite	11704655	II	9	0	9	0	0	rep.3	55275346			9
144211	II	13583084	MantaDUP:TANDEM:773:0:1:0:0:0	C	<DUP:TANDEM>	999	PASS	END=13583647;SVTYPE=DUP;SVLEN=563;SVINSLEN=1;SVINSSEQ=T	GT:FT:GQ:PL:PR:SR	0/1:PASS:786:999,0,783:41,12:56,32	Tandem Duplication	Heterozygous	P0_N2_control_hermaphrodite	13583647	II	0	0	0	0	0	rep.3	55275346			0
144211	II	13870622	MantaDUP:TANDEM:789:0:1:0:0:0	C	<DUP:TANDEM>	819	PASS	END=13871114;SVTYPE=DUP;SVLEN=492;CIPOS=0,30;CIEND=0,30;HOMLEN=30;HOMSEQ=GATTTTTAGGCAGTTTTTTTCACAATTTTC	GT:FT:GQ:PL:PR:SR	0/1:PASS:819:869,0,870:33,14:50,21	Tandem Duplication	Heterozygous	P0_N2_control_hermaphrodite	13871114	II	30	0	30	0	30	rep.3	55275346			30
144211	II	15049162	MantaBND:813:0:0:1:0:0:1	T	[II:15049584[T	949	PASS	SVTYPE=BND;MATEID=MantaBND:813:0:0:1:0:0:0;CIPOS=0,14;HOMLEN=14;HOMSEQ=TAGACAACTTTTTA;BND_DEPTH=86;MATE_BND_DEPTH=103	GT:FT:GQ:PL:PR:SR	0/1:PASS:949:999,0,957:36,10:60,23	Translocation	Heterozygous	P0_N2_control_hermaphrodite	15049584	II	14	0	14	0	0	rep.3	55275346	4		14
144211	II	15049557	MantaBND:813:0:1:0:0:0:0	T	T]II:15050142]	999	PASS	SVTYPE=BND;MATEID=MantaBND:813:0:1:0:0:0:1;CIPOS=0,2;HOMLEN=2;HOMSEQ=TT;BND_DEPTH=103;MATE_BND_DEPTH=94	GT:FT:GQ:PL:PR:SR	0/1:PASS:839:999,0,836:26,9:56,44	Translocation	Heterozygous	P0_N2_control_hermaphrodite	15050142	II	2	0	2	0	0	rep.3	55275346	2		2			LONGPAL3
144211	II	15049570	MantaBND:813:0:0:1:0:0:0	A	[II:15049176[A	949	PASS	SVTYPE=BND;MATEID=MantaBND:813:0:0:1:0:0:1;CIPOS=0,14;HOMLEN=14;HOMSEQ=AAAAGTTGTCTAAT;BND_DEPTH=103;MATE_BND_DEPTH=86	GT:FT:GQ:PL:PR:SR	0/1:PASS:949:999,0,957:36,10:60,23	Translocation	Heterozygous	P0_N2_control_hermaphrodite	15049176	II	14	0	14	0	0	rep.3	55275346	4		14
144211	II	15050140	MantaBND:813:0:1:0:0:0:1	A	A]II:15049559]	999	PASS	SVTYPE=BND;MATEID=MantaBND:813:0:1:0:0:0:0;CIPOS=0,2;HOMLEN=2;HOMSEQ=AA;BND_DEPTH=94;MATE_BND_DEPTH=103	GT:FT:GQ:PL:PR:SR	0/1:PASS:839:999,0,836:26,9:56,44	Translocation	Heterozygous	P0_N2_control_hermaphrodite	15049559	II	2	0	2	0	0	rep.3	55275346	2		2		LONGPAL3
144211	III	55714	MantaBND:394:2:3:0:0:0:0	A	]V:12864683]A	999	PASS	SVTYPE=BND;MATEID=MantaBND:394:2:3:0:0:0:1;BND_DEPTH=115;MATE_BND_DEPTH=53	GT:FT:GQ:PL:PR:SR	0/1:PASS:519:999,0,516:18,7:45,36	Translocation	Heterozygous	P0_N2_control_hermaphrodite	12864683	V	0	0	0	0	0	rep.3	55275346	3		0
144211	III	467776	MantaBND:835:0:2:0:0:0:0	T	[V:18995437[T	272	PASS	SVTYPE=BND;MATEID=MantaBND:835:0:2:0:0:0:1;CIPOS=0,2;HOMLEN=2;HOMSEQ=GT;BND_DEPTH=86;MATE_BND_DEPTH=79	GT:FT:GQ:PL:PR:SR	0/1:PASS:272:322,0,999:46,4:88,13	Translocation	Heterozygous	P0_N2_control_hermaphrodite	18995437	V	2	0	2	0	0	rep.3	55275346	4		2		PAL8D_CE	PAL5A_CE
144211	III	2261463	MantaINS:33:1:1:0:0:0	T	TAAAAATGGGGAATTAGAGTGCGAAGTTAAAGGTGGAGTAGCGTCAGTGTGGA	999	PASS	END=2261463;SVTYPE=INS;SVLEN=52;CIGAR=1M52I;CIPOS=0,2;HOMLEN=2;HOMSEQ=AA	GT:FT:GQ:PL:PR:SR	1/1:PASS:130:999,133,0:0,0:0,46	Insertion	Homozygous	P0_N2_control_hermaphrodite	2261463	III	2	0	2	0	0	rep.3	55275346			2
144211	III	2496712	MantaBND:739:3:4:0:0:0:0	G	[II:11530043[G	58	PASS	SVTYPE=BND;MATEID=MantaBND:739:3:4:0:0:0:1;IMPRECISE;CIPOS=-98,98;BND_DEPTH=78;MATE_BND_DEPTH=151	GT:FT:GQ:PL:PR	0/1:PASS:58:108,0,562:38,13	Translocation	Heterozygous	P0_N2_control_hermaphrodite	11530043	II	0	-98	98	0	0	rep.3	55275346	4		98			LONGPAL2
144211	III	2514165	MantaINS:56:19:19:0:2:0	A	<INS>	999	PASS	END=2514165;SVTYPE=INS;CIPOS=0,10;CIEND=0,10;HOMLEN=10;HOMSEQ=ACTTTTCCTC;LEFT_SVINSSEQ=ACTTTTCCTCACGAGGGACGAGGAAAAGTGGTTTCTAGGCCATGGTCGAGGGGCCGACAAGTTTCATCGGCCATTTATCTTGCTTTGTTTTCCGCCTGTTTTCTTTCGTTTTTCATCGATTTTTTTTCGTTTTTTCTTAATAAAACTGATAAATAAATATTTTTTGCAGATGCTAAAACAATTTCCAAGTAAAAAAATCATGTATTTAGTGGGCAAGCAGCGGTGAAAGTGGTCAATGCAATATGATGGATTACGGGAATACAAAAACTAAACTTTTTCTGAAACATGATACATATGCTGCTTAAATGCTGA…	GT:FT:GQ:PL:PR:SR	1/1:PASS:111:999,114,0:0,8:0,33	Insertion	Homozygous	P0_N2_control_hermaphrodite	2514165	III	10	0	10	0	10	rep.3	55275346			10
144211	III	3681028	MantaINS:926:0:0:0:2:0	T	<INS>	999	PASS	END=3681028;SVTYPE=INS;CIPOS=0,7;CIEND=0,7;HOMLEN=7;HOMSEQ=CTACATA;LEFT_SVINSSEQ=CTACATAGGCGCACAGGTAGGCATATGTAGTCTTCGCCCTTGTAGGCACACAGGTAGGCCTGTGAG;RIGHT_SVINSSEQ=CAGGTAGGCCTGTGAGTCCCCCCCCCCTGTGTGCCTACAAGGGCGAAGA	GT:FT:GQ:PL:PR:SR	1/1:PASS:89:999,92,0:0,0:0,36	Insertion	Homozygous	P0_N2_control_hermaphrodite	3681028	III	7	0	7	0	7	rep.3	55275346			7
144211	III	4026034	MantaINS:944:0:0:1:2:0	T	TTTTGTTTTTTTGTGCCTGTATATACCTGTTGAAATTGGAATTCAAGACAAAAACCCGTGTAGCGCGGCTGGGATAGAATATCTCGGTCCAGAAATTTACCCCTCATATTATAAAAAATTAGCAATTTTTTACCATATCAATTCCCCCAAAAATTCAAAATTTTTATG	156	PASS	END=4026034;SVTYPE=INS;SVLEN=167;CIGAR=1M167I;CIPOS=0,32;HOMLEN=32;HOMSEQ=TTTGTTTTTTTGTGCCTGTATATACCTGTTGA	GT:FT:GQ:PL:PR:SR	1/1:PASS:18:209,21,0:0,0:1,36	Insertion	Homozygous	P0_N2_control_hermaphrodite	4026034	III	32	0	32	0	0	rep.3	55275346			32
144211	III	4670588	MantaBND:947:0:2:2:1:0:1	T	]V:20705450]T	999	PASS	SVTYPE=BND;MATEID=MantaBND:947:0:2:2:1:0:0;BND_DEPTH=50;MATE_BND_DEPTH=118	GT:FT:GQ:PL:PR:SR	0/1:PASS:337:999,0,334:11,8:31,26	Translocation	Heterozygous	P0_N2_control_hermaphrodite	20705450	V	0	0	0	0	0	rep.3	55275346	3		0
144211	III	9101282	MantaBND:1027:0:0:0:0:0:1	C	C]III:9101504]	156	PASS	SVTYPE=BND;MATEID=MantaBND:1027:0:0:0:0:0:0;IMPRECISE;CIPOS=-175,176;BND_DEPTH=64;MATE_BND_DEPTH=88	GT:FT:GQ:PL:PR	0/1:PASS:156:206,0,427:30,15	Translocation	Heterozygous	P0_N2_control_hermaphrodite	9101504	III	0	-175	176	0	0	rep.3	55275346	2		176
144211	III	9101504	MantaBND:1027:0:0:0:0:0:0	A	A]III:9101282]	156	PASS	SVTYPE=BND;MATEID=MantaBND:1027:0:0:0:0:0:1;IMPRECISE;CIPOS=-188,188;BND_DEPTH=88;MATE_BND_DEPTH=64	GT:FT:GQ:PL:PR	0/1:PASS:156:206,0,427:30,15	Translocation	Heterozygous	P0_N2_control_hermaphrodite	9101282	III	0	-188	188	0	0	rep.3	55275346	2		188
144211	III	9938753	MantaINS:829:1:1:0:0:0	C	CTCTGCTAAATATTTAGCATACCCACATTGGGTCTGCTAAATATTTAGCATACCCACATTGGGTCTGCTAAATATTTAGCATACCCACCTTGGG	963	PASS	END=9938753;SVTYPE=INS;SVLEN=93;CIGAR=1M93I;CIPOS=0,55;HOMLEN=55;HOMSEQ=TCTGCTAAATATTTAGCATACCCACATTGGGTCTGCTAAATATTTAGCATACCCA	GT:FT:GQ:PL:PR:SR	1/1:PASS:77:999,80,0:0,0:0,35	Insertion	Homozygous	P0_N2_control_hermaphrodite	9938753	III	55	0	55	0	0	rep.3	55275346			55
144211	III	10557581	MantaINS:474:6:6:0:0:0	A	ACCGCAAGTAGATTCTTTCCGCCGGTTCGAAATTTTCCGCAAGTAGATTTTTCCGCCGGTAGATTTTTCCGGTGGTAGATTCTTTCCGCCGGTTCGAGTTTTT	999	PASS	END=10557581;SVTYPE=INS;SVLEN=102;CIGAR=1M102I;CIPOS=0,36;HOMLEN=36;HOMSEQ=CCGCAAGTAGATTCTTTCCGCCGGTTCGAAATTTTC	GT:FT:GQ:PL:PR:SR	1/1:PASS:128:999,131,0:0,1:0,53	Insertion	Homozygous	P0_N2_control_hermaphrodite	10557581	III	36	0	36	0	0	rep.3	55275346			36
144211	III	11114372	MantaBND:1092:2:3:0:0:0:1	T	T]V:306865]	190	PASS	SVTYPE=BND;MATEID=MantaBND:1092:2:3:0:0:0:0;CIPOS=0,65;HOMLEN=65;HOMSEQ=CGAGGTTCGCTTTTTTCACGGCCACCTCTTCCATTTGAAAACAGGGGGGAAATTAGAAACCCGTG;BND_DEPTH=78;MATE_BND_DEPTH=32	GT:FT:GQ:PL:PR:SR	0/1:PASS:190:240,0,277:15,5:13,5	Translocation	Heterozygous	P0_N2_control_hermaphrodite	306865	V	65	0	65	0	0	rep.3	55275346	2		65			PALTTAA3_CE
144211	III	11114378	MantaBND:1092:1:3:0:0:0:0	T	T]V:17040204]	539	PASS	SVTYPE=BND;MATEID=MantaBND:1092:1:3:0:0:0:1;CIPOS=0,59;HOMLEN=59;HOMSEQ=TCGCTTTTTTCACGGCCACCTCTTCCATTTGAAAACAGGGGGGAAATTAGAAACCCGTG;BND_DEPTH=78;MATE_BND_DEPTH=36	GT:FT:GQ:PL:PR:SR	0/1:PASS:329:589,0,326:17,8:16,10	Translocation	Heterozygous	P0_N2_control_hermaphrodite	17040204	V	59	0	59	0	0	rep.3	55275346	2		59			LINE2F_CE
144211	III	11932011	MantaDUP:TANDEM:1122:0:1:0:0:0	A	<DUP:TANDEM>	999	PASS	END=11932246;SVTYPE=DUP;SVLEN=235;SVINSLEN=8;SVINSSEQ=TATAGATG	GT:FT:GQ:PL:PR:SR	0/1:PASS:846:999,0,843:39,4:50,36	Tandem Duplication	Heterozygous	P0_N2_control_hermaphrodite	11932246	III	0	0	0	0	0	rep.3	55275346			0
144211	III	12376544	MantaDUP:TANDEM:1133:0:0:3:0:0	C	<DUP:TANDEM>	437	PASS	END=12376674;SVTYPE=DUP;SVLEN=130;CIPOS=0,14;CIEND=0,14;HOMLEN=14;HOMSEQ=TAAAATTTCAAACG	GT:FT:GQ:PL:PR:SR	0/1:PASS:315:487,0,312:7,1:34,18	Tandem Duplication	Heterozygous	P0_N2_control_hermaphrodite	12376674	III	14	0	14	0	14	rep.3	55275346			14
144211	III	12376545	MantaBND:1133:0:1:2:0:0:1	T	[III:12627387[T	999	PASS	SVTYPE=BND;MATEID=MantaBND:1133:0:1:2:0:0:0;CIPOS=0,20;HOMLEN=20;HOMSEQ=AAAATTTCAAACGAAAATTC;BND_DEPTH=65;MATE_BND_DEPTH=87	GT:FT:GQ:PL:PR:SR	0/1:PASS:449:999,0,446:21,5:34,34	Translocation	Heterozygous	P0_N2_control_hermaphrodite	12627387	III	20	0	20	0	0	rep.3	55275346	4		20
144211	III	12627367	MantaBND:1133:0:1:2:0:0:0	A	[III:12376565[A	999	PASS	SVTYPE=BND;MATEID=MantaBND:1133:0:1:2:0:0:1;CIPOS=0,20;HOMLEN=20;HOMSEQ=ATTTTCGTTTGAAATTTTAA;BND_DEPTH=87;MATE_BND_DEPTH=65	GT:FT:GQ:PL:PR:SR	0/1:PASS:449:999,0,446:21,5:34,34	Translocation	Heterozygous	P0_N2_control_hermaphrodite	12376565	III	20	0	20	0	0	rep.3	55275346	4		20
144211	III	13032395	MantaDEL:1155:0:0:0:2:0	TACCGTCCGCTATCTCCCGTACGTTCGGTATGTCCGATACCGCCCGTGTCGCATGTTACCGCCCATACCGCCCGCTACCACCTGTTACCGCCCGCTACCGCCCGCTACCGCCCGCTACCGCCCGCTGTCGCATGTTACCGCCCATTACCGCCCGT	TGTCGCATGC	351	PASS	END=13032549;SVTYPE=DEL;SVLEN=-154;CIGAR=1M9I154D	GT:FT:GQ:PL:PR:SR	1/1:PASS:23:404,26,0:1,0:18,16	Deletion	Homozygous	P0_N2_control_hermaphrodite	13032549	III	0	0	0	0	0	rep.3	55275346			0
144211	IV	1154730	MantaBND:113:0:2:0:1:0:0	A	A[X:2003885[	40	PASS	SVTYPE=BND;MATEID=MantaBND:113:0:2:0:1:0:1;CIPOS=0,8;HOMLEN=8;HOMSEQ=ATTTTTCC;BND_DEPTH=60;MATE_BND_DEPTH=99	GT:FT:GQ:PL:PR:SR	0/1:PASS:40:90,0,999:43,5:90,6	Translocation	Heterozygous	P0_N2_control_hermaphrodite	2003885	X	8	0	8	0	0	rep.3	55275346	1		8		RC123	Helitron2_CE
144211	IV	1312645	MantaBND:283:4:5:0:0:0:1	G	G]X:216896]	999	PASS	SVTYPE=BND;MATEID=MantaBND:283:4:5:0:0:0:0;CIPOS=0,8;HOMLEN=8;HOMSEQ=AGATCAAC;BND_DEPTH=66;MATE_BND_DEPTH=38	GT:FT:GQ:PL:PR:SR	0/1:PASS:371:999,0,368:13,7:24,23	Translocation	Heterozygous	P0_N2_control_hermaphrodite	216896	X	8	0	8	0	0	rep.3	55275346	2		8
144211	IV	4198417	MantaBND:493:2:3:0:0:0:1	G	]II:1659665]G	73	PASS	SVTYPE=BND;MATEID=MantaBND:493:2:3:0:0:0:0;IMPRECISE;CIPOS=-111,112;BND_DEPTH=54;MATE_BND_DEPTH=109	GT:FT:GQ:PL:PR	0/1:PASS:73:123,0,563:38,13	Translocation	Heterozygous	P0_N2_control_hermaphrodite	1659665	II	0	-111	112	0	0	rep.3	55275346	3		112		LONGPAL3
144211	IV	4816396	MantaBND:814:2:3:1:1:0:0	A	ATCGACT[V:9724732[	999	PASS	SVTYPE=BND;MATEID=MantaBND:814:2:3:1:1:0:1;SVINSLEN=6;SVINSSEQ=TCGACT;BND_DEPTH=114;MATE_BND_DEPTH=86	GT:FT:GQ:PL:PR:SR	0/1:PASS:493:999,0,490:15,21:30,33	Translocation	Heterozygous	P0_N2_control_hermaphrodite	9724732	V	0	0	0	0	0	rep.3	55275346	1	TCGACT	0		IR3_CE	CELE14B
144211	IV	4816486	MantaBND:814:2:3:0:0:0:1	A	A]V:9724715]	43	PASS	SVTYPE=BND;MATEID=MantaBND:814:2:3:0:0:0:0;IMPRECISE;CIPOS=-176,176;BND_DEPTH=70;MATE_BND_DEPTH=86	GT:FT:GQ:PL:PR	0/1:PASS:43:93,0,487:33,11	Translocation	Heterozygous	P0_N2_control_hermaphrodite	9724715	V	0	-176	176	0	0	rep.3	55275346	2		176		IR3_CE	CELE14B
144211	IV	6005764	MantaBND:1305:0:1:0:0:0:1	C	[V:10866331[C	196	PASS	SVTYPE=BND;MATEID=MantaBND:1305:0:1:0:0:0:0;IMPRECISE;CIPOS=-221,222;BND_DEPTH=128;MATE_BND_DEPTH=111	GT:FT:GQ:PL:PR	0/1:PASS:196:246,0,999:77,24	Translocation	Heterozygous	P0_N2_control_hermaphrodite	10866331	V	0	-221	222	0	0	rep.3	55275346	4		222
144211	IV	6320432	MantaBND:1313:0:1:0:0:0:0	T	]V:4914049]TGT	999	PASS	SVTYPE=BND;MATEID=MantaBND:1313:0:1:0:0:0:1;SVINSLEN=2;SVINSSEQ=TG;BND_DEPTH=91;MATE_BND_DEPTH=80	GT:FT:GQ:PL:PR:SR	0/1:PASS:221:999,0,218:15,30:25,43	Translocation	Heterozygous	P0_N2_control_hermaphrodite	4914049	V	0	0	0	0	0	rep.3	55275346	3	TG	0		PALTA3_CE
144211	IV	7485251	MantaINS:1359:0:0:0:3:0	A	<INS>	999	PASS	END=7485251;SVTYPE=INS;CIPOS=0,10;CIEND=0,10;HOMLEN=10;HOMSEQ=GGATCCGAAA;LEFT_SVINSSEQ=GGATCCGAAAAGTATCGAACAAGTGATGACACGTCTACAAATTAGCAAACAATGGAATACACTTCGTGCTCTACTCAACTATGTTCGTTCGAATCAAATGGATTCCATGATCCGCTCGTTCCCGCTTATTTGGTTCCGTGTTTATGAAAATGCCTTGATTGAATTGAATGGTGGATCCATGGCGAATCCAGATTGGAATTACGAACAATGCGTTATGCTTCGAAAATGGACTTTGTGGGCAATGAGCAGCAATGTCGAAGGAGGACGTCAACCAAATATTGCTCGATTCCTCCGTGAAATCAATTGTCCCAT…	GT:FT:GQ:PL:PR:SR	1/1:PASS:237:999,240,0:0,5:0,102	Insertion	Homozygous	P0_N2_control_hermaphrodite	7485251	IV	10	0	10	0	10	rep.3	55275346			10
144211	IV	8566417	MantaBND:22:1:4:0:0:0:1	A	]I:8054335]A	999	PASS	SVTYPE=BND;MATEID=MantaBND:22:1:4:0:0:0:0;CIPOS=0,37;HOMLEN=37;HOMSEQ=CTCGGCATTTGGCTCTAGCTTCTTGCCCAAGTTTAGC;BND_DEPTH=82;MATE_BND_DEPTH=57	GT:FT:GQ:PL:PR:SR	0/1:PASS:320:999,0,317:12,5:23,27	Translocation	Heterozygous	P0_N2_control_hermaphrodite	8054335	I	37	0	37	0	0	rep.3	55275346	3		37
144211	IV	9852302	MantaDUP:TANDEM:1421:0:1:0:0:0	T	<DUP:TANDEM>	921	PASS	END=9852492;SVTYPE=DUP;SVLEN=190;CIPOS=0,4;CIEND=0,4;HOMLEN=4;HOMSEQ=AAAT	GT:FT:GQ:PL:PR:SR	0/1:PASS:921:971,0,999:42,6:69,34	Tandem Duplication	Heterozygous	P0_N2_control_hermaphrodite	9852492	IV	4	0	4	0	4	rep.3	55275346			4
144211	IV	11144437	MantaDUP:TANDEM:1453:0:1:0:0:0	G	<DUP:TANDEM>	29	PASS	END=11145070;SVTYPE=DUP;SVLEN=633;IMPRECISE;CIPOS=-264,265;CIEND=-266,266	GT:FT:GQ:PL:PR	0/1:PASS:29:79,0,845:57,19	Tandem Duplication	Heterozygous	P0_N2_control_hermaphrodite	11145070	IV	0	-264	265	-266	266	rep.3	55275346			266
144211	IV	12688217	MantaINS:1479:0:0:0:0:0	A	AAAAAATACGATCGCACAAAAATAAACAACGACGCAACGACACTCCGCTGTTTTCAATCCCCGCCCACGATTTCATTTGCACTGCGGCCGCCACATTTCAGTGCAAATGAAATCGTGGCGAGGCTTAAAAATAGCGGAGTGTCGTTGCGTCGTTGTTTATTTTTGTGCGATCGTATTTTTTCTATAATAATT	999	PASS	END=12688217;SVTYPE=INS;SVLEN=191;CIGAR=1M191I;CIPOS=0,7;HOMLEN=7;HOMSEQ=AAAAATA	GT:FT:GQ:PL:PR:SR	1/1:PASS:112:999,115,0:0,11:0,40	Insertion	Homozygous	P0_N2_control_hermaphrodite	12688217	IV	7	0	7	0	0	rep.3	55275346			7
144211	IV	16571333	MantaBND:947:6:8:0:0:0:0	C	]V:17490437]C	452	PASS	SVTYPE=BND;MATEID=MantaBND:947:6:8:0:0:0:1;CIPOS=0,38;HOMLEN=38;HOMSEQ=TAGGGCTGTGCAACCGGACGTCCGGTTTTTTCGGACGT;BND_DEPTH=68;MATE_BND_DEPTH=39	GT:FT:GQ:PL:PR:SR	0/1:PASS:203:502,0,200:9,4:14,14	Translocation	Heterozygous	P0_N2_control_hermaphrodite	17490437	V	38	0	38	0	0	rep.3	55275346	3		38
144211	IV	17326114	MantaBND:105:3:8:0:0:0:0	T	T]I:11511661]	112	PASS	SVTYPE=BND;MATEID=MantaBND:105:3:8:0:0:0:1;IMPRECISE;CIPOS=-114,114;BND_DEPTH=68;MATE_BND_DEPTH=81	GT:FT:GQ:PL:PR	0/1:PASS:112:162,0,357:25,13	Translocation	Heterozygous	P0_N2_control_hermaphrodite	11511661	I	0	-114	114	0	0	rep.3	55275346	2		114		PALTTAA3_CE	HAT3_CE
144211	IV	17492374	MantaINS:452:6:6:3:0:0	T	TGAGTAAAATAAACTGTAAAGCCAGAGAGTAAAAAATACGGTGAAGCCAGAGAGTAAAATAAACTGTGAAGCCAGAGAGTAAAATATACGGTGAAGCCAGA	999	PASS	END=17492374;SVTYPE=INS;SVLEN=100;CIGAR=1M100I;CIPOS=0,16;HOMLEN=16;HOMSEQ=GAGTAAAATAAACTGT	GT:FT:GQ:PL:PR:SR	1/1:PASS:141:999,144,0:0,0:0,55	Insertion	Homozygous	P0_N2_control_hermaphrodite	17492374	IV	16	0	16	0	0	rep.3	55275346			16
144211	V	226036	MantaINS:757:3:3:0:2:0	T	<INS>	999	PASS	END=226036;SVTYPE=INS;CIPOS=0,6;CIEND=0,6;HOMLEN=6;HOMSEQ=GGAGCG;LEFT_SVINSSEQ=GGAGCGCGGACGGGGCGCGACTAGACACGGGTTCGCGCTCCAGTCACCCTTTTTTTCGCGCTCCTTACGCGCCACGTCCGCGCTCCAATCGCGTTTGCTCCGCGCGCATTCCGAATTTGAAAAATTCTTACGAAATTTTATGGGACGCGATCAGAGCGCCAACGTGGCGCGGAAGGAGCGCGAAAAAACGTGTGACTGGAGCGCCAACCCGTA;RIGHT_SVINSSEQ=CGAAAAAACGTGTGACTGGAGCGCCAACCCGTAATCTAGTCGCGCCCCGTCCGCGCTCCTGGA	GT:FT:GQ:PL:PR:SR	1/1:PASS:118:999,121,0:0,12:0,31	Insertion	Homozygous	P0_N2_control_hermaphrodite	226036	V	6	0	6	0	6	rep.3	55275346			6
144211	V	226037	MantaBND:757:3:6:0:0:0:0	G	[V:845512[G	999	PASS	SVTYPE=BND;MATEID=MantaBND:757:3:6:0:0:0:1;CIPOS=0,16;HOMLEN=16;HOMSEQ=GAGCGATTTGCGGAGC;BND_DEPTH=86;MATE_BND_DEPTH=61	GT:FT:GQ:PL:PR:SR	0/1:PASS:309:999,0,306:11,2:25,31	Translocation	Heterozygous	P0_N2_control_hermaphrodite	845512	V	16	0	16	0	0	rep.3	55275346	4		16			NPAL0A_CE
144211	V	306800	MantaBND:1092:2:3:0:0:0:0	T	T]III:11114437]	190	PASS	SVTYPE=BND;MATEID=MantaBND:1092:2:3:0:0:0:1;CIPOS=0,65;HOMLEN=65;HOMSEQ=CACGGGTTTCTAATTTCCCCCCTGTTTTCAAATGGAAGAGGTGGCCGTGAAAAAAGCGAACCTCG;BND_DEPTH=32;MATE_BND_DEPTH=78	GT:FT:GQ:PL:PR:SR	0/1:PASS:190:240,0,277:15,5:13,5	Translocation	Heterozygous	P0_N2_control_hermaphrodite	11114437	III	65	0	65	0	0	rep.3	55275346	2		65		PALTTAA3_CE
144211	V	686153	MantaBND:500:0:1:0:0:0:0	T	]II:2141116]T	999	PASS	SVTYPE=BND;MATEID=MantaBND:500:0:1:0:0:0:1;CIPOS=0,12;HOMLEN=12;HOMSEQ=TAACAAGGAAAG;BND_DEPTH=122;MATE_BND_DEPTH=103	GT:FT:GQ:PL:PR:SR	0/1:PASS:439:999,0,436:21,19:34,43	Translocation	Heterozygous	P0_N2_control_hermaphrodite	2141116	II	12	0	12	0	0	rep.3	55275346	3		12
144211	V	845496	MantaBND:757:3:6:0:0:0:1	C	[V:226053[C	999	PASS	SVTYPE=BND;MATEID=MantaBND:757:3:6:0:0:0:0;CIPOS=0,16;HOMLEN=16;HOMSEQ=TCCGCAAATCGCTCCT;BND_DEPTH=61;MATE_BND_DEPTH=86	GT:FT:GQ:PL:PR:SR	0/1:PASS:309:999,0,306:11,2:25,31	Translocation	Heterozygous	P0_N2_control_hermaphrodite	226053	V	16	0	16	0	0	rep.3	55275346	4		16		NPAL0A_CE
144211	V	1772177	MantaBND:77:1:2:0:0:0:0	A	[I:2295529[A	704	PASS	SVTYPE=BND;MATEID=MantaBND:77:1:2:0:0:0:1;CIPOS=0,27;HOMLEN=27;HOMSEQ=GCGCGCTCTAATAATTATTCGGCTTTG;BND_DEPTH=52;MATE_BND_DEPTH=101	GT:FT:GQ:PL:PR:SR	0/1:PASS:514:754,0,511:26,5:28,16	Translocation	Heterozygous	P0_N2_control_hermaphrodite	2295529	I	27	0	27	0	0	rep.3	55275346	4		27
144211	V	2600122	MantaINS:1659:0:0:2:0:0	G	GAAAAATTCGATGAATTTTTGAGAAAGTATCTGAACCAAAACAAAAAGTTATAAGCAGAATTTGCATAAAATAGTAAAACACATTATTGTGTATCATTTTACAATAAAATTAGATGTGTTTTACTATTTTATGCAACTTCTGCTTATAACTTTTTGTTTTGGTTCAGATACTTTCTC	999	PASS	END=2600122;SVTYPE=INS;SVLEN=176;CIGAR=1M176I;CIPOS=0,8;HOMLEN=8;HOMSEQ=AAAAATTC	GT:FT:GQ:PL:PR:SR	1/1:PASS:226:999,229,0:0,3:0,98	Insertion	Homozygous	P0_N2_control_hermaphrodite	2600122	V	8	0	8	0	0	rep.3	55275346			8
144211	V	4914043	MantaINS:1313:1:1:0:2:0	T	<INS>	999	PASS	END=4914043;SVTYPE=INS;CIPOS=0,6;CIEND=0,6;HOMLEN=6;HOMSEQ=TTTTGA;LEFT_SVINSSEQ=TTTTGATGTACACTCAAAATAATAAAACTGCGTGGCGTGTACTGCAGAAAACCTGATATTTA;RIGHT_SVINSSEQ=GTTTAACTCGTTGTGGGCGCGGCAAGCTGTCTCCGCCCGCTGCGAGTTAAACATAGCGGCGCGCGGAACACGTAGGATGTCGGCGGCCTGATATTGGTTGGTCCCCGAATTTTTGCCTTTTCTCCGTGAGTGGACGAGAAAAAGGCGGGGCCTAAATATTAGGTTTTCTGCAGTACACGCCACGCAGTTTTATTA	GT:FT:GQ:PL:PR:SR	1/1:PASS:133:999,136,0:0,8:0,42	Insertion	Homozygous	P0_N2_control_hermaphrodite	4914043	V	6	0	6	0	6	rep.3	55275346			6
144211	V	4914049	MantaBND:1313:0:1:0:0:0:1	A	ATG[IV:6320432[	999	PASS	SVTYPE=BND;MATEID=MantaBND:1313:0:1:0:0:0:0;SVINSLEN=2;SVINSSEQ=TG;BND_DEPTH=80;MATE_BND_DEPTH=91	GT:FT:GQ:PL:PR:SR	0/1:PASS:221:999,0,218:15,30:25,43	Translocation	Heterozygous	P0_N2_control_hermaphrodite	6320432	IV	0	0	0	0	0	rep.3	55275346	1	TG	0			PALTA3_CE
144211	V	8158794	MantaINS:1809:0:0:0:3:0	A	<INS>	999	PASS	END=8158794;SVTYPE=INS;CIPOS=0,6;CIEND=0,6;HOMLEN=6;HOMSEQ=ATGATC;LEFT_SVINSSEQ=ATGATCGCTGATGACTGAAAAAAAGAAAAAAAAAGAAAAACTGAAGCCTCGATCAAACTGACCTAAATATTTGTAGGACTTTGATATTTGCTAGCATCATTTATTATTTTCATTCAAATTTATTTAAAACGTTTCAGGAATCTATGGAGACTCTATCAATGAGATGTCATGGGCAGTTGGAGAGGTTTTAGACAGTCTTGTAAATGCTGGAATTGCTGAAAATACATTGGTTATTTTAATGTCTGATCATGGACCACATGTTGAACTATGTCTAAATGGTGGATCAACAGCTGGATTGAAAGGAGGAAAGTCGAATAGT…	GT:FT:GQ:PL:PR:SR	1/1:PASS:145:999,148,0:0,4:0,52	Insertion	Homozygous	P0_N2_control_hermaphrodite	8158794	V	6	0	6	0	6	rep.3	55275346			6
144211	V	9554018	MantaBND:116:4:5:0:0:0:0	A	A]X:466278]	999	PASS	SVTYPE=BND;MATEID=MantaBND:116:4:5:0:0:0:1;CIPOS=0,36;HOMLEN=36;HOMSEQ=TTCTCGGCATTTCGTGCCTACTTTCTCCCACCTTTT;BND_DEPTH=47;MATE_BND_DEPTH=158	GT:FT:GQ:PL:PR:SR	0/1:PASS:475:999,0,472:25,25:27,32	Translocation	Heterozygous	P0_N2_control_hermaphrodite	466278	X	36	0	36	0	0	rep.3	55275346	2		36
144211	V	9554051	MantaBND:116:2:5:0:0:0:0	T	[X:466019[T	999	PASS	SVTYPE=BND;MATEID=MantaBND:116:2:5:0:0:0:1;CIPOS=0,37;HOMLEN=37;HOMSEQ=TTTCGCCTTCCGGCAAAAAGGTGGGAGAAAGAAGACG;BND_DEPTH=47;MATE_BND_DEPTH=113	GT:FT:GQ:PL:PR:SR	0/1:PASS:379:999,0,376:24,14:31,35	Translocation	Heterozygous	P0_N2_control_hermaphrodite	466019	X	37	0	37	0	0	rep.3	55275346	4		37
144211	V	9724715	MantaBND:814:2:3:0:0:0:0	C	C]IV:4816486]	43	PASS	SVTYPE=BND;MATEID=MantaBND:814:2:3:0:0:0:1;IMPRECISE;CIPOS=-268,268;BND_DEPTH=86;MATE_BND_DEPTH=70	GT:FT:GQ:PL:PR	0/1:PASS:43:93,0,487:33,11	Translocation	Heterozygous	P0_N2_control_hermaphrodite	4816486	IV	0	-268	268	0	0	rep.3	55275346	2		268		CELE14B	IR3_CE
144211	V	9724732	MantaBND:814:2:3:1:1:0:1	A	]IV:4816396]TCGACTA	999	PASS	SVTYPE=BND;MATEID=MantaBND:814:2:3:1:1:0:0;SVINSLEN=6;SVINSSEQ=TCGACT;BND_DEPTH=86;MATE_BND_DEPTH=114	GT:FT:GQ:PL:PR:SR	0/1:PASS:493:999,0,490:15,21:30,33	Translocation	Heterozygous	P0_N2_control_hermaphrodite	4816396	IV	0	0	0	0	0	rep.3	55275346	3	TCGACT	0		CELE14B	IR3_CE
144211	V	10866331	MantaBND:1305:0:1:0:0:0:0	T	[IV:6005764[T	196	PASS	SVTYPE=BND;MATEID=MantaBND:1305:0:1:0:0:0:1;IMPRECISE;CIPOS=-156,156;BND_DEPTH=111;MATE_BND_DEPTH=128	GT:FT:GQ:PL:PR	0/1:PASS:196:246,0,999:77,24	Translocation	Heterozygous	P0_N2_control_hermaphrodite	6005764	IV	0	-156	156	0	0	rep.3	55275346	4		156
144211	V	11690781	MantaINS:1890:0:0:0:0:0	A	AAAAATTTTCAATAAAAAATCAAATAAATAAATAAATAAATATGCTGATAAAAACACACAAACTATTGAATTGATATCACTGATAAAATAATAAAGAATAATCAGTCTTGCTTTGGAATTTTTATTCAAAAATCAAGACTGATTATTCTTTATTATTTTATCAGTGATATCAATTCAATAGTTTGTGTGTTTTTATCAGCATATTTATTTATTTATTTATTTGATTTTTTATTGAAAATTTTTTATTG	999	PASS	END=11690781;SVTYPE=INS;SVLEN=247;CIGAR=1M247I;CIPOS=0,8;HOMLEN=8;HOMSEQ=AAAATTTT	GT:FT:GQ:PL:PR:SR	1/1:PASS:185:999,188,0:0,4:0,75	Insertion	Homozygous	P0_N2_control_hermaphrodite	11690781	V	8	0	8	0	0	rep.3	55275346			8
144211	V	12167424	MantaINS:1891:0:0:0:0:0	C	CCCTGGTGGTCCTGGTGGTCCGGCTGGGCATGTGATGCAAGCAGAAGCAGATGAGTGTTGTTCAGCAACTCCAGCTCCTCCAGCTTGTCCATCACCTCCTGGTTCTCCTGCCTCTCCTGGAGCACCATCCTCT	999	PASS	END=12167424;SVTYPE=INS;SVLEN=132;CIGAR=1M132I;CIPOS=0,20;HOMLEN=20;HOMSEQ=CCTGGTGGTCCTGGTGGTCC	GT:FT:GQ:PL:PR:SR	1/1:PASS:217:999,220,0:0,0:0,92	Insertion	Homozygous	P0_N2_control_hermaphrodite	12167424	V	20	0	20	0	0	rep.3	55275346			20
144211	V	12375972	MantaINS:1908:0:0:0:2:0	A	<INS>	999	PASS	END=12375972;SVTYPE=INS;LEFT_SVINSSEQ=CAGTGCTGGCCAAAAAGATATCCACTTTTGGTTTTTTGTGTGTAACTTTTTTCTCAAGCATCCATTTGACTTGAATTTTTCCGTGTGCATAAAGCGAAATGGTACGCAAATTTGCGGACCAAACATTACATGATTATCGATTTTTTCTGAATTTTATTTCAATTTTTTGATTTTTTCGTTTTTCCAATTTTCATTATTTTTTTGAATTATCAATAAAACGCACTCTGTTTGTTGCACTGGATTTGTTTGGTTGATAAATTATTTTTAAGGTATGGTAAAATCTGTTGGGTGTAAAAATCTTTCCTTGGACGTCAAGAAAGCCATTGTAG;RIGHT_SVINSSEQ=GTTTTTTCAAAATCTG…	GT:FT:GQ:PL:PR:SR	1/1:PASS:45:999,48,0:2,9:5,24	Insertion	Homozygous	P0_N2_control_hermaphrodite	12375972	V	0	0	0	0	0	rep.3	55275346			0
144211	V	12864683	MantaBND:394:2:3:0:0:0:1	A	A[III:55714[	999	PASS	SVTYPE=BND;MATEID=MantaBND:394:2:3:0:0:0:0;BND_DEPTH=53;MATE_BND_DEPTH=115	GT:FT:GQ:PL:PR:SR	0/1:PASS:519:999,0,516:18,7:45,36	Translocation	Heterozygous	P0_N2_control_hermaphrodite	55714	III	0	0	0	0	0	rep.3	55275346	1		0
144211	V	13362655	MantaDUP:TANDEM:1922:0:1:0:0:0	T	<DUP:TANDEM>	999	PASS	END=13367099;SVTYPE=DUP;SVLEN=4444;CIPOS=0,2;CIEND=0,2;HOMLEN=2;HOMSEQ=AT	GT:FT:GQ:PL:PR:SR	0/1:PASS:999:999,0,999:30,18:73,37	Tandem Duplication	Heterozygous	P0_N2_control_hermaphrodite	13367099	V	2	0	2	0	2	rep.3	55275346			2
144211	V	14744889	MantaINS:471:1:1:0:0:0	T	TCCACCTCCTCCTGCTGCGTAGCCTCCTCCTGACGATCCTCCTCCACCTCCACCTGACGAGTATCCTCCAGATGATGCCTGTGGACCAGCAGATTCAGGCGCCGGTGGTGGTGGGGGAGCCGATGCAGCTGCATATCCTCCTCCACCTCCTCCTGAGGGCTTAGCGTACCCTCCTCCTGACGGTCCTCCACCTCGTCCCGAAGCATATCCTCCACCTCCACCTGATGGCTTTGCGTATCCTCCACCACCTCCGCCTCCTCCTGATGCGTATCCACCACCACCTCCTCCTGATGGCTTAGGATATCCTCCGCCTGCTCCA	999	PASS	END=14744889;SVTYPE=INS;SVLEN=318;CIGAR=1M318I;CIPOS=0,13;HOMLEN=13;HOMSEQ=CCACCTCCTCCTG	GT:FT:GQ:PL:PR:SR	1/1:PASS:141:999,144,0:2,0:0,72	Insertion	Homozygous	P0_N2_control_hermaphrodite	14744889	V	13	0	13	0	0	rep.3	55275346			13
144211	V	17040145	MantaBND:1092:1:3:0:0:0:1	A	A]III:11114437]	539	PASS	SVTYPE=BND;MATEID=MantaBND:1092:1:3:0:0:0:0;CIPOS=0,59;HOMLEN=59;HOMSEQ=CACGGGTTTCTAATTTCCCCCCTGTTTTCAAATGGAAGAGGTGGCCGTGAAAAAAGCGA;BND_DEPTH=36;MATE_BND_DEPTH=78	GT:FT:GQ:PL:PR:SR	0/1:PASS:329:589,0,326:17,8:16,10	Translocation	Heterozygous	P0_N2_control_hermaphrodite	11114437	III	59	0	59	0	0	rep.3	55275346	2		59		LINE2F_CE
144211	V	17490437	MantaBND:947:6:8:0:0:0:1	G	G[IV:16571333[	452	PASS	SVTYPE=BND;MATEID=MantaBND:947:6:8:0:0:0:0;CIPOS=0,38;HOMLEN=38;HOMSEQ=CTAGGGCTGTGCAACCGGACGTCCGGTTTTTTCGGACG;BND_DEPTH=39;MATE_BND_DEPTH=68	GT:FT:GQ:PL:PR:SR	0/1:PASS:203:502,0,200:9,4:14,14	Translocation	Heterozygous	P0_N2_control_hermaphrodite	16571333	IV	38	0	38	0	0	rep.3	55275346	1		38
144211	V	18175236	MantaDEL:2036:2:2:0:0:0	GCGCAATTCTAGTGACTTGACGCAATTCTAGTTCCTTGACGCAATTCTAGTGTATTGACGCAATTCTAGTACTTTGGCGCTATTCCAGTACTTTGGCGCAATTCTAGTTCCTTGACGCAATTCTAGTGTATTGACGCATATCTAGTACTTTGGCGCTATTCCAGTACATTGGCGCAATTCTAGTGGCTTGACGCAATTATCGTGCCTTGGTGCAATTCTAGTTCCTTGACGCAATTCTAGTGGCTTGACGCAATTCTAGTGTATTGA	G	408	PASS	END=18175502;SVTYPE=DEL;SVLEN=-266;CIGAR=1M266D;CIPOS=0,26;HOMLEN=26;HOMSEQ=CGCAATTCTAGTGACTTGACGCAATT	GT:FT:GQ:PL:PR:SR	0/1:PASS:408:458,0,790:34,12:66,18	Deletion	Heterozygous	P0_N2_control_hermaphrodite	18175502	V	26	0	26	0	0	rep.3	55275346			26
144211	V	18681667	MantaDEL:2060:3:3:1:0:0	CCAAAAAATTTCAAAATTCAAAAAATTTCAAAAATTTCAAAAATTTCAAAAATTCTAAAAATTTCAAAATTCCTT	C	204	PASS	END=18681741;SVTYPE=DEL;SVLEN=-74;CIGAR=1M74D;CIPOS=0,18;HOMLEN=18;HOMSEQ=CAAAAAATTTCAAAATTC	GT:FT:GQ:PL:PR:SR	0/1:PASS:204:254,0,395:12,0:44,10	Deletion	Heterozygous	P0_N2_control_hermaphrodite	18681741	V	18	0	18	0	0	rep.3	55275346			18
144211	V	18682059	MantaDEL:2093:0:0:0:1:0	TAAAATTTCAAAATTCCAAAAAATTTAAAAAATTAAAAATTCCACAAAATTTCAAAATTCCAAAAAATTTCAAAATTCCACAAAATTTCAAAATTCCAAAAAATTTCTAAATTTCTAAAATTTCAAAATTCCAAAAAATTTAAAAAATTAAAAATTCCACAAAATTTCAAAATTCCAAAAAATTTCAAAATTCCAC	T	816	PASS	END=18682254;SVTYPE=DEL;SVLEN=-195;CIGAR=1M195D;CIPOS=0,24;HOMLEN=24;HOMSEQ=AAAATTTCAAAATTCCAAAAAATT	GT:FT:GQ:PL:PR:SR	0/1:PASS:557:866,0,554:21,2:61,25	Deletion	Heterozygous	P0_N2_control_hermaphrodite	18682254	V	24	0	24	0	0	rep.3	55275346			24
144211	V	18683253	MantaDEL:2060:2:2:0:0:0	CAAAAAATTTCAAAATTCCAAAAAATTTCAAAATTCCAAAAAAATTCAAAATTTCA	C	536	PASS	END=18683308;SVTYPE=DEL;SVLEN=-55;CIGAR=1M55D;CIPOS=0,5;HOMLEN=5;HOMSEQ=AAAAA	GT:FT:GQ:PL:PR:SR	0/1:PASS:531:586,0,530:8,0:41,16	Deletion	Heterozygous	P0_N2_control_hermaphrodite	18683308	V	5	0	5	0	0	rep.3	55275346			5
144211	V	18995435	MantaBND:835:0:2:0:0:0:1	C	[III:467778[C	272	PASS	SVTYPE=BND;MATEID=MantaBND:835:0:2:0:0:0:0;CIPOS=0,2;HOMLEN=2;HOMSEQ=AC;BND_DEPTH=79;MATE_BND_DEPTH=86	GT:FT:GQ:PL:PR:SR	0/1:PASS:272:322,0,999:46,4:88,13	Translocation	Heterozygous	P0_N2_control_hermaphrodite	467778	III	2	0	2	0	0	rep.3	55275346	4		2		PAL5A_CE	PAL8D_CE
144211	V	19877606	MantaDEL:421:1:1:2:0:0	TTTTTTTTCATCACACTTAATTAAAAAATTCATATTCTTCATGAAATTCTACACATTTCCCAATTTGGAA	TGAAT	990	PASS	END=19877675;SVTYPE=DEL;SVLEN=-69;CIGAR=1M4I69D	GT:FT:GQ:PL:PR:SR	0/1:PASS:624:999,0,621:8,0:51,27	Deletion	Heterozygous	P0_N2_control_hermaphrodite	19877675	V	0	0	0	0	0	rep.3	55275346			0
144211	V	20398658	MantaINS:2083:0:0:0:0:0	GGATT	GCGATTTTTAGAAATTTTGTGGAATTTTAGAACGTTTTTAAGAGTTTTTTGTGAATTTTTGGAACTTATTGAGGTTTTTAGGGATTCTTTTTTTGCAATTTTTGCGGACTTTTTGGAGGTTTTGGGAGAAATTTTGAGCGTTTTGGAAGGTTTTTAGACGATTTTTTTTGCAAATTTTGGAGATTTTTAGTATATTTTTCAATTTTAATCGGAATTTTAGAGAGAATCAGAAGGTTTTTGGGAGTTTTTTTTGCGAATTTTTGGAACTTTCTGAGGTTTTTAGAGA	999	PASS	END=20398662;SVTYPE=INS;SVLEN=285;CIGAR=1M285I4D	GT:FT:GQ:PL:PR:SR	1/1:PASS:18:999,21,0:6,0:3,39	Insertion	Homozygous	P0_N2_control_hermaphrodite	20398662	V	0	0	0	0	0	rep.3	55275346			0
144211	V	20705450	MantaBND:947:0:2:2:1:0:0	A	A[III:4670588[	999	PASS	SVTYPE=BND;MATEID=MantaBND:947:0:2:2:1:0:1;BND_DEPTH=118;MATE_BND_DEPTH=50	GT:FT:GQ:PL:PR:SR	0/1:PASS:337:999,0,334:11,8:31,26	Translocation	Heterozygous	P0_N2_control_hermaphrodite	4670588	III	0	0	0	0	0	rep.3	55275346	1		0
144211	X	216888	MantaBND:283:4:5:0:0:0:0	T	T]IV:1312653]	999	PASS	SVTYPE=BND;MATEID=MantaBND:283:4:5:0:0:0:1;CIPOS=0,8;HOMLEN=8;HOMSEQ=GTTGATCT;BND_DEPTH=38;MATE_BND_DEPTH=66	GT:FT:GQ:PL:PR:SR	0/1:PASS:371:999,0,368:13,7:24,23	Translocation	Heterozygous	P0_N2_control_hermaphrodite	1312653	IV	8	0	8	0	0	rep.3	55275346	2		8
144211	X	216891	MantaBND:283:2:5:0:0:0:0	T	T]X:256071]	999	PASS	SVTYPE=BND;MATEID=MantaBND:283:2:5:0:0:0:1;CIPOS=0,5;HOMLEN=5;HOMSEQ=GATCT;BND_DEPTH=38;MATE_BND_DEPTH=26	GT:FT:GQ:PL:PR:SR	1/1:PASS:82:999,85,0:0,16:0,17	Translocation	Homozygous	P0_N2_control_hermaphrodite	256071	X	5	0	5	0	0	rep.3	55275346	2		5
144211	X	256066	MantaBND:283:2:5:0:0:0:1	G	G]X:216896]	999	PASS	SVTYPE=BND;MATEID=MantaBND:283:2:5:0:0:0:0;CIPOS=0,5;HOMLEN=5;HOMSEQ=AGATC;BND_DEPTH=26;MATE_BND_DEPTH=38	GT:FT:GQ:PL:PR:SR	1/1:PASS:82:999,85,0:0,16:0,17	Translocation	Homozygous	P0_N2_control_hermaphrodite	216896	X	5	0	5	0	0	rep.3	55275346	2		5
144211	X	465982	MantaBND:116:2:5:0:0:0:1	G	[V:9554088[G	999	PASS	SVTYPE=BND;MATEID=MantaBND:116:2:5:0:0:0:0;CIPOS=0,37;HOMLEN=37;HOMSEQ=TCTTCTTTCTCCCACCTTTTTGCCGGAAGGCGAAAAA;BND_DEPTH=113;MATE_BND_DEPTH=47	GT:FT:GQ:PL:PR:SR	0/1:PASS:379:999,0,376:24,14:31,35	Translocation	Heterozygous	P0_N2_control_hermaphrodite	9554088	V	37	0	37	0	0	rep.3	55275346	4		37
144211	X	466044	MantaBND:116:0:2:0:0:0:1	G	]I:2652464]G	999	PASS	SVTYPE=BND;MATEID=MantaBND:116:0:2:0:0:0:0;CIPOS=0,4;HOMLEN=4;HOMSEQ=TGGT;BND_DEPTH=140;MATE_BND_DEPTH=44	GT:FT:GQ:PL:PR:SR	0/1:PASS:377:999,0,374:0,9:37,34	Translocation	Heterozygous	P0_N2_control_hermaphrodite	2652464	I	4	0	4	0	0	rep.3	55275346	3		4
144211	X	466242	MantaBND:116:4:5:0:0:0:1	A	A]V:9554054]	999	PASS	SVTYPE=BND;MATEID=MantaBND:116:4:5:0:0:0:0;CIPOS=0,36;HOMLEN=36;HOMSEQ=AAAAGGTGGGAGAAAGTAGGCACGAAATGCCGAGAA;BND_DEPTH=158;MATE_BND_DEPTH=47	GT:FT:GQ:PL:PR:SR	0/1:PASS:475:999,0,472:25,25:27,32	Translocation	Heterozygous	P0_N2_control_hermaphrodite	9554054	V	36	0	36	0	0	rep.3	55275346	2		36
144211	X	466247	MantaBND:116:0:4:0:2:0:0	G	G[I:2652465[	574	PASS	SVTYPE=BND;MATEID=MantaBND:116:0:4:0:2:0:1;CIPOS=0,23;HOMLEN=23;HOMSEQ=GTGGGAGAAAGTAGGCACGAAAT;BND_DEPTH=167;MATE_BND_DEPTH=46	GT:FT:GQ:PL:PR:SR	0/1:PASS:533:624,0,530:28,5:32,17	Translocation	Heterozygous	P0_N2_control_hermaphrodite	2652465	I	23	0	23	0	0	rep.3	55275346	1		23
144211	X	1417333	MantaINS:2130:0:0:0:0:0	A	AAACTCTTTTCCTTTCCTCAGTCACCGCGTTGGGGGGTTTTTCGAAGGTACCTCTAACTTGGTGACTGAGGAAAGGAAAAGAGTTTTTG	999	PASS	END=1417333;SVTYPE=INS;SVLEN=88;CIGAR=1M88I;CIPOS=0,10;HOMLEN=10;HOMSEQ=AACTCTTTTC	GT:FT:GQ:PL:PR:SR	1/1:PASS:94:999,97,0:0,0:8,53	Insertion	Homozygous	P0_N2_control_hermaphrodite	1417333	X	10	0	10	0	0	rep.3	55275346			10
144211	X	2003885	MantaBND:113:0:2:0:1:0:1	A	]IV:1154730]A	40	PASS	SVTYPE=BND;MATEID=MantaBND:113:0:2:0:1:0:0;CIPOS=0,8;HOMLEN=8;HOMSEQ=TTTTTCCC;BND_DEPTH=99;MATE_BND_DEPTH=60	GT:FT:GQ:PL:PR:SR	0/1:PASS:40:90,0,999:43,5:90,6	Translocation	Heterozygous	P0_N2_control_hermaphrodite	1154730	IV	8	0	8	0	0	rep.3	55275346	3		8		Helitron2_CE	RC123
144211	X	2990089	MantaINS:96:27:27:0:3:0	T	<INS>	238	PASS	END=2990089;SVTYPE=INS;CIPOS=0,33;CIEND=0,33;HOMLEN=33;HOMSEQ=AGAGAGAGAGAGAGAGAGAGAGAGAGAGAGAGA;LEFT_SVINSSEQ=AGAGAGAGAGAGAGAGAGAGAGAGAGAGAGAGAGAGAGAGAGAGAGAGAGAGAGAGAGAGAGAGAGAGAGAGAGAGA;RIGHT_SVINSSEQ=GAGAGAGAGAGAGAGAGAGAGAGAGAGAGAGAGAGAGAGAG	GT:FT:GQ:PL:PR:SR	1/1:PASS:20:291,22,0:0,2:0,18	Insertion	Homozygous	P0_N2_control_hermaphrodite	2990089	X	33	0	33	0	33	rep.3	55275346			33
144211	X	3301847	MantaDEL:2169:0:1:1:0:0	T	<DEL>	90	PASS	END=3304391;SVTYPE=DEL;SVLEN=-2544;IMPRECISE;CIPOS=-152,153;CIEND=-121,122	GT:FT:GQ:PL:PR	0/1:PASS:90:140,0,838:56,15	Deletion	Heterozygous	P0_N2_control_hermaphrodite	3304391	X	0	-152	153	-121	122	rep.3	55275346			153
144211	X	6833298	MantaINS:22:5:5:0:0:0	T	TCTAAACTTGGGCAAAAGTTAGGCAAAACTTTGGCAAGAGTTGGGTGAAACTTGGGTTAGACTTTGGTAAAGCTTGAATCCAAGTTTTGCCAAAGTCTTGCCTAACTTTTGCCCAAGTTTAGACAGCTTCTGATCCAAGTTAATATTTTTTGGG	999	PASS	END=6833298;SVTYPE=INS;SVLEN=153;CIGAR=1M153I;CIPOS=0,14;HOMLEN=14;HOMSEQ=CTAAACTTGGGCAA	GT:FT:GQ:PL:PR:SR	1/1:PASS:50:999,53,0:0,7:11,29	Insertion	Homozygous	P0_N2_control_hermaphrodite	6833298	X	14	0	14	0	0	rep.3	55275346			14
144211	X	8429683	MantaINS:1282:0:0:0:0:0	G	GCGTCCGGTCGTCCGAACCGGACGCACATGCGTCCGGTTGGGGGTAGGTTCCCACGGCGGCCGACAATTTCCGAGTTTCGCCACTCACTATACTTAATCAGTAATTTTATAGTGAGTGGCGAAACTCGGAAATTGTCGGCCGTCGTGGATAGCTACCCCCAACCGGACGCATGTGCGTCCGGTTCGGACGACCGGA	999	PASS	END=8429683;SVTYPE=INS;SVLEN=195;CIGAR=1M195I;CIPOS=0,8;HOMLEN=8;HOMSEQ=CGTCCGGT	GT:FT:GQ:PL:PR:SR	1/1:PASS:119:999,122,0:0,18:1,33	Insertion	Homozygous	P0_N2_control_hermaphrodite	8429683	X	8	0	8	0	0	rep.3	55275346			8
144211	X	8651736	MantaINS:493:1:1:0:4:0	G	<INS>	999	PASS	END=8651736;SVTYPE=INS;CIPOS=0,1;CIEND=0,1;HOMLEN=1;HOMSEQ=G;LEFT_SVINSSEQ=GGCATCGAGAGAGGGGGCATCGCGTTCTAAGGGGGCATTAGGTCAAAGGGGGCATTTGTTCGTAGGGGGCATCCGTTC;RIGHT_SVINSSEQ=AACGGATGCCCCCTCTGAACGGATGCCCCCTACGAACAAATGCCCCCTTTGACCTAATGCCCCCTTAGAACGCGATGCCCCCTCTCTCGATGCCCCCTGGGA	GT:FT:GQ:PL:PR:SR	1/1:PASS:95:999,98,0:0,6:0,31	Insertion	Homozygous	P0_N2_control_hermaphrodite	8651736	X	1	0	1	0	1	rep.3	55275346			1
144211	X	8651737	MantaBND:493:1:3:0:0:0:0	G	]II:1659790]G	798	PASS	SVTYPE=BND;MATEID=MantaBND:493:1:3:0:0:0:1;CIPOS=0,9;HOMLEN=9;HOMSEQ=CATAGGCCA;BND_DEPTH=70;MATE_BND_DEPTH=48	GT:FT:GQ:PL:PR:SR	0/1:PASS:371:848,0,368:15,5:29,20	Translocation	Heterozygous	P0_N2_control_hermaphrodite	1659790	II	9	0	9	0	0	rep.3	55275346	3		9
144211	X	10908378	MantaDEL:2354:0:0:0:0:0	AATCGAATGAATATTATATTTCTTCTTCATCAACAACTTGGGCATACTCGAAGAACGCTTCATGCC	A	999	PASS	END=10908443;SVTYPE=DEL;SVLEN=-65;CIGAR=1M65D;CIPOS=0,2;HOMLEN=2;HOMSEQ=AT	GT:FT:GQ:PL:PR:SR	1/1:PASS:113:999,116,0:0,0:0,47	Deletion	Homozygous	P0_N2_control_hermaphrodite	10908443	X	2	0	2	0	0	rep.3	55275346			2
144211	X	12190992	MantaBND:2394:0:1:0:0:0:1	C	C]X:12199124]	999	PASS	SVTYPE=BND;MATEID=MantaBND:2394:0:1:0:0:0:0;CIPOS=0,4;HOMLEN=4;HOMSEQ=GATC;BND_DEPTH=85;MATE_BND_DEPTH=86	GT:FT:GQ:PL:PR:SR	1/1:PASS:167:999,170,0:0,34:0,56	Translocation	Homozygous	P0_N2_control_hermaphrodite	12199124	X	4	0	4	0	0	rep.3	55275346	2		4
144211	X	12199120	MantaBND:2394:0:1:0:0:0:0	T	T]X:12190996]	999	PASS	SVTYPE=BND;MATEID=MantaBND:2394:0:1:0:0:0:1;CIPOS=0,4;HOMLEN=4;HOMSEQ=GATC;BND_DEPTH=86;MATE_BND_DEPTH=85	GT:FT:GQ:PL:PR:SR	1/1:PASS:167:999,170,0:0,34:0,56	Translocation	Homozygous	P0_N2_control_hermaphrodite	12190996	X	4	0	4	0	0	rep.3	55275346	2		4
144211	X	12276603	MantaINS:113:32:32:3:0:0	TC	TTTATTTTATTAACATTTATTTATTTTATTAATTAATATTTATTTATTTAATTAATATTTATTTATTTAATTAATGTTTATTTATTTAATTAATATTTATTTAATTAATTAATATTTATTTATTTAATTAGTATTTATTTTTTTAATTAATATTTTTTAATTTAATTAATATTTATTTTATTAATTAATATTTTTTTATTTAAATAATATTTATTTATTTAATTAGTATTTATTTATTTAATTAATATTTATTTTATTAATTAATATTTATTTATTTAAATAATATTTATT	999	PASS	END=12276604;SVTYPE=INS;SVLEN=290;CIGAR=1M290I1D	GT:FT:GQ:PL:PR:SR	1/1:PASS:51:999,54,0:2,0:0,40	Insertion	Homozygous	P0_N2_control_hermaphrodite	12276604	X	0	0	0	0	0	rep.3	55275346			0
144211	X	14788284	MantaDEL:2456:0:1:0:0:0	TGCGTCCGGTTTGGGGTAGCTTTCCATGGCGGCCGACAATTTCCGAGTTTCGCCACTGACTATAAAATTGCTGATTAAGTATAGTTAGTCGAGAAACTCGGAAATTGTCGGCCGCCGTGAAAAGCTACCCCAAACCGGACACATGG	T	233	PASS	END=14788429;SVTYPE=DEL;SVLEN=-145;CIGAR=1M145D;CIPOS=0,9;HOMLEN=9;HOMSEQ=GCGTCCGGT	GT:FT:GQ:PL:PR:SR	0/1:PASS:233:283,0,550:12,0:40,10	Deletion	Heterozygous	P0_N2_control_hermaphrodite	14788429	X	9	0	9	0	0	rep.3	55275346			9
144211	X	15750402	MantaINS:394:6:6:0:2:0	G	<INS>	999	PASS	END=15750402;SVTYPE=INS;CIPOS=0,11;CIEND=0,11;HOMLEN=11;HOMSEQ=GTAAGTTTTCA;LEFT_SVINSSEQ=GTAAGTTTTCAAGAATGGGCTCATAAAACTTGTTGTCTCCAGTGGCATATAACTCTGCGGAAAAAAATCCAATAAAAAAAGAACCACTAACGAGTTGCAGATAATGATCTAATCAACAACTTCTCAGTTGAAAACTTTTTGTCAAAAAAATTGTTGGCCGAGTTAAGAGTGCTTGAAAAAAGCGGCAAAAAGCTTAAATATTCCTGAAATTCTCATGTCCAAACCTCGGCCAACAATTTTTTTGACAAAAAGTTTTCAACTGAGAAGTTGTTGATTAGATCATTATCTGCAACTTGTTAGTGATTCATTT…	GT:FT:GQ:PL:PR:SR	1/1:PASS:89:999,92,0:0,5:0,29	Insertion	Homozygous	P0_N2_control_hermaphrodite	15750402	X	11	0	11	0	11	rep.3	55275346			11
144211	X	16884752	MantaBND:602:0:2:0:0:0:1	T	[II:6187764[T	999	PASS	SVTYPE=BND;MATEID=MantaBND:602:0:2:0:0:0:0;CIPOS=0,7;HOMLEN=7;HOMSEQ=CGGGATG;BND_DEPTH=153;MATE_BND_DEPTH=116	GT:FT:GQ:PL:PR:SR	0/1:PASS:610:999,0,607:27,5:40,44	Translocation	Heterozygous	P0_N2_control_hermaphrodite	6187764	II	7	0	7	0	0	rep.3	55275346	4		7		(CGGGATGGAT)n	(TCCCGATCCA)n
144213	I	229005	MantaBND:2:0:1:0:0:0:0	G	]IV:6006456]G	47	PASS	SVTYPE=BND;MATEID=MantaBND:2:0:1:0:0:0:1;IMPRECISE;CIPOS=-205,205;BND_DEPTH=40;MATE_BND_DEPTH=57	GT:FT:GQ:PL:PR	0/1:PASS:47:97,0,579:39,11	Translocation	Heterozygous	P0_N2_treated_hermaphrodite	6006456	IV	0	-205	205	0	0	rep.1	45361197	3		205		CER12-I_CE
144213	I	238556	MantaBND:10:0:1:0:0:0:1	T	T]V:10866741]	154	PASS	SVTYPE=BND;MATEID=MantaBND:10:0:1:0:0:0:0;IMPRECISE;CIPOS=-233,233;BND_DEPTH=100;MATE_BND_DEPTH=116	GT:FT:GQ:PL:PR	0/1:PASS:154:204,0,906:61,19	Translocation	Heterozygous	P0_N2_treated_hermaphrodite	10866741	V	0	-233	233	0	0	rep.1	45361197	2		233	x
144213	I	678691	MantaDEL:16:0:0:0:0:0	TCCATATGATCCGTCGAAGCTGAAGGATCAGAACATCAGGAGGTACCCATGTGATCATTCGGCTCTGAAAGATCAGATCATCAGGCAGAGCCTCATGTTCTTTTGGAGCTGAAGGATCAGAACATCAGGAAGAGCCTCATGATCCTTTGGATCTGAAGGATCAGACCATCAGGAGGTACCCTTACGATCCTTCTTATCTGAAAGATCAGATCATCAGAAGGTA	T	981	PASS	END=678913;SVTYPE=DEL;SVLEN=-222;CIGAR=1M222D;CIPOS=0,4;HOMLEN=4;HOMSEQ=CCAT	GT:FT:GQ:PL:PR:SR	0/1:PASS:671:999,0,668:25,8:54,28	Deletion	Heterozygous	P0_N2_treated_hermaphrodite	678913	I	4	0	4	0	0	rep.1	45361197			4
144213	I	2002703	MantaBND:58:0:1:0:0:0:1	C	]III:468056]C	541	PASS	SVTYPE=BND;MATEID=MantaBND:58:0:1:0:0:0:0;BND_DEPTH=52;MATE_BND_DEPTH=89	GT:FT:GQ:PL:PR:SR	0/1:PASS:541:591,0,985:36,4:68,17	Translocation	Heterozygous	P0_N2_treated_hermaphrodite	468056	III	0	0	0	0	0	rep.1	45361197	3		0	x	PAL5A_CE	CEMUDR1
144213	I	2295502	MantaBND:73:0:1:0:0:0:1	A	[V:1772204[A	568	PASS	SVTYPE=BND;MATEID=MantaBND:73:0:1:0:0:0:0;CIPOS=0,27;HOMLEN=27;HOMSEQ=AAGCCGAATAATTATTAGAGCGCGCTT;BND_DEPTH=80;MATE_BND_DEPTH=46	GT:FT:GQ:PL:PR:SR	0/1:PASS:456:618,0,453:19,4:25,15	Translocation	Heterozygous	P0_N2_treated_hermaphrodite	1772204	V	27	0	27	0	0	rep.1	45361197	4		27		CELE14A	PALTTAA1_CE
144213	I	2652464	MantaBND:78:0:1:0:0:0:1	A	A[X:466044[	885	PASS	SVTYPE=BND;MATEID=MantaBND:78:0:1:0:0:0:0;CIPOS=0,4;HOMLEN=4;HOMSEQ=GTGG;BND_DEPTH=36;MATE_BND_DEPTH=108	GT:FT:GQ:PL:PR:SR	0/1:PASS:331:935,0,328:16,5:29,24	Translocation	Heterozygous	P0_N2_treated_hermaphrodite	466044	X	4	0	4	0	0	rep.1	45361197	1		4	x
144213	I	2893748	MantaINS:84:0:0:0:2:0	T	<INS>	999	PASS	END=2893748;SVTYPE=INS;CIPOS=0,8;CIEND=0,8;HOMLEN=8;HOMSEQ=AAATGGGA;LEFT_SVINSSEQ=AAATGGGAAGTAGAGTTTGTGGGTATTTTGCTTAAATAGACTAAAACTGGTCCAAAACCACCGAATTTCATAATGAGACTTCACAAAAAATTTCCAAAAATTTTTTATGGCGGGTCAAAATTTCGAAAAAAAAAGAGTTAAATTTTGCTAAAATCTGAAATTTCGCACACTTTTCTTTGTCACAGCC;RIGHT_SVINSSEQ=GCCTAAAAGTTGTCTCAATCAGCGAATTTCCGCGAGATAAATTACCAAAATAAGGATTAATGGTTGATAATTTCAGAAAAACTAAAATCCAGCGGCTGTGACAAAGAAAAGTGT…	GT:FT:GQ:PL:PR:SR	1/1:PASS:115:999,118,0:0,5:0,39	Insertion	Homozygous	P0_N2_treated_hermaphrodite	2893748	I	8	0	8	0	8	rep.1	45361197			8
144213	I	4548881	MantaBND:157:0:3:0:0:0:0	A	]IV:6470036]A	40	PASS	SVTYPE=BND;MATEID=MantaBND:157:0:3:0:0:0:1;IMPRECISE;CIPOS=-221,221;BND_DEPTH=64;MATE_BND_DEPTH=59	GT:FT:GQ:PL:PR	0/1:PASS:40:90,0,521:35,11	Translocation	Heterozygous	P0_N2_treated_hermaphrodite	6470036	IV	0	-221	221	0	0	rep.1	45361197	3		221	x	(TTTTTA)n
144213	I	5185162	MantaINS:144:0:0:0:0:0	T	TATCGAAAAAATACGATCGCACAAATTTCTCATAATTTATTTTTGATCTACCTTGTTGACTAGGCTCCTCCCCTTCCTTCGAGACAGCCACAACAAAATAACAACGGCAACAAGATTGGGGCGGAGTCAAGTTCAACAGGTAGATCAAAAATTAATTATGATAAATTTGTGCGATCGTATTTTTTCGATAATA	999	PASS	END=5185162;SVTYPE=INS;SVLEN=192;CIGAR=1M192I;CIPOS=0,8;HOMLEN=8;HOMSEQ=ATCGAAAA	GT:FT:GQ:PL:PR:SR	1/1:PASS:176:999,179,0:0,11:0,55	Insertion	Homozygous	P0_N2_treated_hermaphrodite	5185162	I	8	0	8	0	0	rep.1	45361197			8
144213	I	6521294	MantaINS:160:0:0:0:0:0	A	AGATCGAAACAATTATTGGAAATGTATTAAATGAAATGAAATCAGAATTGCATTTAGGGGGTAGTAGTCGCATCTTTAGTCAGATTATTCAGATATAGTATGAAGTTTTTAGATAATAAATCAATTCTTTCAGACGTTTCTTGTGGAGTGGGCATCATTTATTTTGGCCAAAACGTTTTCTCACTCACACGAAAGAATAGGAACAAACTGTGCAAATCCAATAGATTCTTGTT	999	PASS	END=6521294;SVTYPE=INS;SVLEN=232;CIGAR=1M232I;CIPOS=0,5;HOMLEN=5;HOMSEQ=GATCG	GT:FT:GQ:PL:PR:SR	1/1:PASS:175:999,178,0:0,3:0,67	Insertion	Homozygous	P0_N2_treated_hermaphrodite	6521294	I	5	0	5	0	0	rep.1	45361197			5
144213	I	8454802	MantaINS:198:0:0:0:4:0	T	<INS>	999	PASS	END=8454802;SVTYPE=INS;LEFT_SVINSSEQ=TAGGTGATTGGTAGGTTAGATATTACATATAGGGGGGGGGGGGGGGCATTGACAGAATTCTCTTTTCGATTGGCGTCATTTTTTATGGGTAACTATAGTTGTAGATCCACAAAATC;RIGHT_SVINSSEQ=CCCTCATTACGGGAACGTCGCAAAGTCAAATAGTTGGCAAAGTGGAGAGACGGCAGACATGACGTGGCACCAACCAGCGAAAACACGCAAACGGCGATGATCCGGAAATGGCAGAAAAAAACGAC	GT:FT:GQ:PL:PR:SR	1/1:PASS:149:999,152,0:0,1:0,61	Insertion	Homozygous	P0_N2_treated_hermaphrodite	8454802	I	0	0	0	0	0	rep.1	45361197			0
144213	I	8660489	MantaBND:197:0:0:0:0:0:0	A	ACCGC]I:8660540]	999	PASS	SVTYPE=BND;MATEID=MantaBND:197:0:0:0:0:0:1;SVINSLEN=4;SVINSSEQ=CCGC;BND_DEPTH=119;MATE_BND_DEPTH=77	GT:FT:GQ:PL:PR:SR	0/1:PASS:413:999,0,410:19,19:22,27	Translocation	Heterozygous	P0_N2_treated_hermaphrodite	8660540	I	0	0	0	0	0	rep.1	45361197	2	CCGC	0	x
144213	I	8660540	MantaBND:197:0:0:0:0:0:1	C	CGCGG]I:8660489]	999	PASS	SVTYPE=BND;MATEID=MantaBND:197:0:0:0:0:0:0;SVINSLEN=4;SVINSSEQ=GCGG;BND_DEPTH=77;MATE_BND_DEPTH=119	GT:FT:GQ:PL:PR:SR	0/1:PASS:413:999,0,410:19,19:22,27	Translocation	Heterozygous	P0_N2_treated_hermaphrodite	8660489	I	0	0	0	0	0	rep.1	45361197	2	GCGG	0	x
144213	I	11175582	MantaINS:262:0:0:0:3:0	C	<INS>	999	PASS	END=11175582;SVTYPE=INS;CIPOS=0,6;CIEND=0,6;HOMLEN=6;HOMSEQ=CTCGTG;LEFT_SVINSSEQ=CTCGTGGATTACACGAGCACTGCGTAAATCGACACATGACTAATATTGGGCTTTTCCAATTTAAATCGACTATTTTAAGCTAAAAGTTGCTTGATTTTTAAGAAAAAAAAAGAAGAATTTATGTTAAAAACTACAAATGACCGAATATCATGAAAAAAATTTAAAAAAATATTCTAGATTTTATATGATGTTTTGAAAATTGGAAAAATCTCAGTTTTCCCCTAATTCCTATTTAAATTTCCGCCAATTGGAT;RIGHT_SVINSSEQ=ATATTCGGTCATTTGTAGTTTTTAACATAAATTTTACATTTTTTTTCTT…	GT:FT:GQ:PL:PR:SR	1/1:PASS:104:999,107,0:0,2:0,35	Insertion	Homozygous	P0_N2_treated_hermaphrodite	11175582	I	6	0	6	0	6	rep.1	45361197			6
144213	I	11713576	MantaBND:274:0:1:0:0:0:0	A	A]X:1887948]	312	PASS	SVTYPE=BND;MATEID=MantaBND:274:0:1:0:0:0:1;BND_DEPTH=91;MATE_BND_DEPTH=95	GT:FT:GQ:PL:PR:SR	0/1:PASS:312:362,0,999:38,4:80,22	Translocation	Heterozygous	P0_N2_treated_hermaphrodite	1887948	X	0	0	0	0	0	rep.1	45361197	2		0	x
144213	I	12738722	MantaINS:289:0:0:0:0:0	A	AATCCTTATGATCCTCATCTGGGTAGCCTAGGATAAACATCGGAACGGGAGGATCTGCTTCAAAGATCTTTGGGATCCTCGGCCATACCACTTGAGCTATGAATCTTCAGAAAGATCTGTAGGATCCAGGGGCTACGATCTTCATGGCAAGCTAGGATCCTGAACTAGGTCACTCCCGCTCCTCCAGAATTTTCACTAGGAAAACCAGGTTCCGAAGATCCGTGGAATCTTATGAAGCTGCTCTTCAATCTCTTCAATCAGTATGGGTGATGCTGATGCTGAAGATCTGATAATTGACAGAGG	999	PASS	END=12738722;SVTYPE=INS;SVLEN=302;CIGAR=1M302I;CIPOS=0,19;HOMLEN=19;HOMSEQ=ATCCTTATGATCCTCATCT	GT:FT:GQ:PL:PR:SR	1/1:PASS:82:999,85,0:1,0:0,36	Insertion	Homozygous	P0_N2_treated_hermaphrodite	12738722	I	19	0	19	0	0	rep.1	45361197			19
144213	I	14340289	MantaBND:137:5:6:0:0:0:0	C	C]V:4248552]	607	PASS	SVTYPE=BND;MATEID=MantaBND:137:5:6:0:0:0:1;CIPOS=0,7;HOMLEN=7;HOMSEQ=GCAGTGC;BND_DEPTH=21;MATE_BND_DEPTH=52	GT:FT:GQ:PL:PR:SR	0/1:PASS:104:657,0,101:6,3:8,16	Translocation	Heterozygous	P0_N2_treated_hermaphrodite	4248552	V	7	0	7	0	0	rep.1	45361197	2		7	x
144213	I	14425428	MantaDEL:330:0:0:0:0:0	CAGCAATTTTGCCTAATTTAGACTACAAACTACAGTTATTTGCAATTTGGCACAGTCTGTCTTGATTACTATAATGCAGTAGCAGTAGTCGAAATTTCAAAAAAAATCGCCAAATTCGAATTCAATTTTCTGAGAAAATTCTAATTTTCCTGTTAGATATGTTTTGGGCTCTGCTGATCTGTTGGAAAATGCAAAAAATTCGGTGAAAATCTGTTGAAAACTAGGAATTTAGACTAAATTGACGATTGGTTGAGGCTATCGGACTACAAAC	CTATATTTGGAGCTA	999	PASS	END=14425698;SVTYPE=DEL;SVLEN=-270;CIGAR=1M14I270D	GT:FT:GQ:PL:PR:SR	1/1:PASS:65:999,68,0:0,9:0,23	Deletion	Homozygous	P0_N2_treated_hermaphrodite	14425698	I	0	0	0	0	0	rep.1	45361197			0
144213	II	1454792	MantaDEL:449:0:0:0:1:0	CCGGTTCTATTTTTTCCGTGAGTAGATTTTTCCGCCGGTTCAATTATTCCGCCGGTTCGAGTTTTTCCGCAGATAGATTTTTTCCGCCGGTTCAATTTTTTCCGCCGGTTCTATTTTTTCCGTGAGTAGATTTTTCCGCCGGTTCAATTATTCCGCCGGTTCGAGTTTTTCCGCAGATAGATTTTTTCCGCCGGTTCAATTTTTCCGCCGGTTCG	CAGATAT	323	PASS	END=1455006;SVTYPE=DEL;SVLEN=-214;CIGAR=1M6I214D	GT:FT:GQ:PL:PR:SR	0/1:PASS:323:373,0,537:3,4:49,16	Deletion	Heterozygous	P0_N2_treated_hermaphrodite	1455006	II	0	0	0	0	0	rep.1	45361197			0
144213	II	1455374	MantaBND:376:1:4:0:0:0:1	C	CGAAA]II:1456731]	99	PASS	SVTYPE=BND;MATEID=MantaBND:376:1:4:0:0:0:0;SVINSLEN=4;SVINSSEQ=GAAA;BND_DEPTH=78;MATE_BND_DEPTH=83	GT:FT:GQ:PL:PR:SR	0/1:PASS:99:149,0,999:48,4:82,10	Translocation	Heterozygous	P0_N2_treated_hermaphrodite	1456731	II	0	0	0	0	0	rep.1	45361197	2	GAAA	0
144213	II	1456731	MantaBND:376:1:4:0:0:0:0	A	ATTTC]II:1455374]	99	PASS	SVTYPE=BND;MATEID=MantaBND:376:1:4:0:0:0:1;SVINSLEN=4;SVINSSEQ=TTTC;BND_DEPTH=83;MATE_BND_DEPTH=78	GT:FT:GQ:PL:PR:SR	0/1:PASS:99:149,0,999:48,4:82,10	Translocation	Heterozygous	P0_N2_treated_hermaphrodite	1455374	II	0	0	0	0	0	rep.1	45361197	2	TTTC	0
144213	II	2141116	MantaBND:392:0:1:0:0:0:1	A	A[V:686153[	999	PASS	SVTYPE=BND;MATEID=MantaBND:392:0:1:0:0:0:0;CIPOS=0,12;HOMLEN=12;HOMSEQ=TTAACAAGGAAA;BND_DEPTH=74;MATE_BND_DEPTH=97	GT:FT:GQ:PL:PR:SR	0/1:PASS:333:999,0,330:17,10:22,31	Translocation	Heterozygous	P0_N2_treated_hermaphrodite	686153	V	12	0	12	0	0	rep.1	45361197	1		12	x
144213	II	2818716	MantaINS:421:0:0:0:2:0	A	<INS>	639	PASS	END=2818716;SVTYPE=INS;CIPOS=0,4;CIEND=0,4;HOMLEN=4;HOMSEQ=GCGC;LEFT_SVINSSEQ=GCGCTCAAAGATTGGGCGCGAGAGAGCGCGGGGAAGGGGAGACGCAGAGCGCCTCGCGCG;RIGHT_SVINSSEQ=GGGAAGGGGAGACGCAGAGCGCCTCGCGCGCCTGCGTCTCCCCTTCCACCGCACTCTCTC	GT:FT:GQ:PL:PR:SR	1/1:PASS:39:692,42,0:0,0:0,14	Insertion	Homozygous	P0_N2_treated_hermaphrodite	2818716	II	4	0	4	0	4	rep.1	45361197			4
144213	II	2897567	MantaDUP:TANDEM:427:0:1:0:0:0	G	<DUP:TANDEM>	265	PASS	END=2898963;SVTYPE=DUP;SVLEN=1396;CIPOS=0,24;CIEND=0,24;HOMLEN=24;HOMSEQ=TAGTCCTAAAATTGTGATTTTTAG	GT:FT:GQ:PL:PR:SR	0/1:PASS:265:315,0,483:12,8:40,12	Tandem Duplication	Heterozygous	P0_N2_treated_hermaphrodite	2898963	II	24	0	24	0	24	rep.1	45361197			24
144213	II	3159582	MantaDEL:434:0:1:0:0:0	T	<DEL>	132	PASS	END=3163349;SVTYPE=DEL;SVLEN=-3767;IMPRECISE;CIPOS=-129,129;CIEND=-74,75	GT:FT:GQ:PL:PR	0/1:PASS:132:182,0,145:11,10	Deletion	Heterozygous	P0_N2_treated_hermaphrodite	3163349	II	0	-129	129	-74	75	rep.1	45361197			129
144213	II	3539921	MantaINS:443:1:1:1:0:0	G	GAATTTTCCAATTTTCTCTTTAAAAAAATACCGGAAAATTCGAAAAAATATCCGATTTTTTCGAAAAAAGTCAGATTTTTCCTTCTGTTTTTCCGACATTTTTTTAAAGAGAAAATCTGAAAATTTTGTGAAAAATAGGATATTTTTCTTTACTTTTTAAGGAAAAATATCAGATTTTCCACTA	999	PASS	END=3539921;SVTYPE=INS;SVLEN=183;CIGAR=1M183I;CIPOS=0,18;HOMLEN=18;HOMSEQ=AATTTTCCAATTTTCTCT	GT:FT:GQ:PL:PR:SR	1/1:PASS:139:999,142,0:0,0:0,55	Insertion	Homozygous	P0_N2_treated_hermaphrodite	3539921	II	18	0	18	0	0	rep.1	45361197			18
144213	II	3833797	MantaINS:466:0:0:1:0:1	ACG	ATGGCTAGTTTAGGGGTGACAGGCAAACGATTTTTTCCGGCAAATCAGCAAACCGGCAATTTGCCGAATTTGCCGGAAAAAACTCAATTGCCGTCCACTCCTGTGATAGTGGATGGTTGT	999	PASS	END=3833799;SVTYPE=INS;SVLEN=119;CIGAR=1M119I2D	GT:FT:GQ:PL:PR:SR	0/1:PASS:640:999,0,637:2,3:46,34	Insertion	Heterozygous	P0_N2_treated_hermaphrodite	3833799	II	0	0	0	0	0	rep.1	45361197			0
144213	II	3834811	MantaDEL:446:0:0:0:0:0	TGCATAAATGGGCATAAATGGGCCAATGAAAAGCATAAATGGGCCAATGAAT	TAAGATATAG	999	PASS	END=3834862;SVTYPE=DEL;SVLEN=-51;CIGAR=1M9I51D	GT:FT:GQ:PL:PR:SR	0/1:PASS:720:999,0,717:12,0:54,27	Deletion	Heterozygous	P0_N2_treated_hermaphrodite	3834862	II	0	0	0	0	0	rep.1	45361197			0
144213	II	6163844	MantaBND:500:0:1:0:0:0:0	G	G]II:6167051]	40	PASS	SVTYPE=BND;MATEID=MantaBND:500:0:1:0:0:0:1;IMPRECISE;CIPOS=-175,175;BND_DEPTH=46;MATE_BND_DEPTH=65	GT:FT:GQ:PL:PR	0/1:PASS:40:90,0,341:23,8	Translocation	Heterozygous	P0_N2_treated_hermaphrodite	6167051	II	0	-175	175	0	0	rep.1	45361197	2		175
144213	II	6167051	MantaBND:500:0:1:0:0:0:1	G	G]II:6163844]	40	PASS	SVTYPE=BND;MATEID=MantaBND:500:0:1:0:0:0:0;IMPRECISE;CIPOS=-110,110;BND_DEPTH=65;MATE_BND_DEPTH=46	GT:FT:GQ:PL:PR	0/1:PASS:40:90,0,341:23,8	Translocation	Heterozygous	P0_N2_treated_hermaphrodite	6163844	II	0	-110	110	0	0	rep.1	45361197	2		110
144213	II	6187738	MantaBND:510:0:2:0:1:0:0	T	[X:16884708[T	999	PASS	SVTYPE=BND;MATEID=MantaBND:510:0:2:0:1:0:1;CIPOS=0,3;HOMLEN=3;HOMSEQ=CCC;BND_DEPTH=135;MATE_BND_DEPTH=124	GT:FT:GQ:PL:PR:SR	0/1:PASS:496:999,0,493:17,7:42,30	Translocation	Heterozygous	P0_N2_treated_hermaphrodite	16884708	X	3	0	3	0	0	rep.1	45361197	4		3		(TCCCGATCCA)n	(CGGGATGGAT)n
144213	II	6505413	MantaDEL:512:0:0:0:0:0	TGATCGGTCCAGAATACAGCCAGTATTTTGGGGTCTCTCCCTAGTTGTTAGGTAAACTTTA	T	28	PASS	END=6505473;SVTYPE=DEL;SVLEN=-60;CIGAR=1M60D;CIPOS=0,27;HOMLEN=27;HOMSEQ=GATCGGTCCAGAATACAGCCAGTATTT	GT:FT:GQ:PL:PR:SR	0/1:PASS:28:78,0,79:1,0:10,2	Deletion	Heterozygous	P0_N2_treated_hermaphrodite	6505473	II	27	0	27	0	0	rep.1	45361197			27
144213	II	6630113	MantaDUP:TANDEM:519:0:1:0:0:0	C	<DUP:TANDEM>	999	PASS	END=6630883;SVTYPE=DUP;SVLEN=770	GT:FT:GQ:PL:PR:SR	0/1:PASS:999:999,0,999:34,23:66,37	Tandem Duplication	Heterozygous	P0_N2_treated_hermaphrodite	6630883	II	0	0	0	0	0	rep.1	45361197			0
144213	II	6669184	MantaINS:511:0:0:0:3:0	T	<INS>	999	PASS	END=6669184;SVTYPE=INS;CIPOS=0,6;CIEND=0,6;HOMLEN=6;HOMSEQ=CATTTC;LEFT_SVINSSEQ=CATTTCCGATGCATTTAATATTATTCCGAATAATACCAGAGTTGGACCACCAGGATTTGTTATCCTGATTGCAAATTCGTGAGTGTTCGCCATGATCACTGTTTCAGAAATTCAATTTTCAGCGCTGATTCGGTTCCAACTTCTGTGAATTCCGCTGTGAATTTGAAAGCTCAAGGGTTTGAAATTGTCACAGTTGGATTTAAATCAGCTGGAGATTTTACCTCGTTGTC;RIGHT_SVINSSEQ=CACTTGTCCCATTCCCTACTGGAAACACACTTGAGCCACTAATGACATACGGAGCTGCAACGACATCAGACAG…	GT:FT:GQ:PL:PR:SR	1/1:PASS:206:999,209,0:0,2:0,80	Insertion	Homozygous	P0_N2_treated_hermaphrodite	6669184	II	6	0	6	0	6	rep.1	45361197			6
144213	II	8262669	MantaBND:557:0:1:1:0:0:1	A	[II:8263119[A	31	PASS	SVTYPE=BND;MATEID=MantaBND:557:0:1:1:0:0:0;IMPRECISE;CIPOS=-141,141;BND_DEPTH=43;MATE_BND_DEPTH=56	GT:FT:GQ:PL:PR	0/1:PASS:31:81,0,511:34,9	Translocation	Heterozygous	P0_N2_treated_hermaphrodite	8263119	II	0	-141	141	0	0	rep.1	45361197	4		141
144213	II	8263119	MantaBND:557:0:1:1:0:0:0	A	[II:8262669[A	31	PASS	SVTYPE=BND;MATEID=MantaBND:557:0:1:1:0:0:1;IMPRECISE;CIPOS=-164,164;BND_DEPTH=56;MATE_BND_DEPTH=43	GT:FT:GQ:PL:PR	0/1:PASS:31:81,0,511:34,9	Translocation	Heterozygous	P0_N2_treated_hermaphrodite	8262669	II	0	-164	164	0	0	rep.1	45361197	4		164
144213	II	11027622	MantaDUP:TANDEM:614:0:1:0:0:0	C	<DUP:TANDEM>	398	PASS	END=11027691;SVTYPE=DUP;SVLEN=69;SVINSLEN=3;SVINSSEQ=AGT	GT:FT:GQ:PL:PR:SR	0/1:PASS:397:448,0,416:9,6:41,22	Tandem Duplication	Heterozygous	P0_N2_treated_hermaphrodite	11027691	II	0	0	0	0	0	rep.1	45361197			0
144213	II	11027640	MantaINS:614:0:0:0:0:0	C	CCGTGAAGATCGCCGTGACCGAAGCAAGGATCGGGAGGATCGTCGTGATCGCAGTAAGGATCGAGACGATCGT	999	PASS	END=11027640;SVTYPE=INS;SVLEN=72;CIGAR=1M72I;CIPOS=0,32;HOMLEN=32;HOMSEQ=CGTGAAGATCGCCGTGACCGAAGCAAGGATCG	GT:FT:GQ:PL:PR:SR	1/1:PASS:163:999,166,0:0,0:0,70	Insertion	Homozygous	P0_N2_treated_hermaphrodite	11027640	II	32	0	32	0	0	rep.1	45361197			32
144213	II	11704655	MantaINS:619:0:0:0:0:0	G	GTTTTTTCAAATGTGCCTCCGTGGAGAAAACCATCTGAAATGTTAAAAAAATTATGTTTTT	999	PASS	END=11704655;SVTYPE=INS;SVLEN=60;CIGAR=1M60I;CIPOS=0,9;HOMLEN=9;HOMSEQ=TTTTTTCAA	GT:FT:GQ:PL:PR:SR	1/1:PASS:100:999,103,0:0,0:0,50	Insertion	Homozygous	P0_N2_treated_hermaphrodite	11704655	II	9	0	9	0	0	rep.1	45361197			9
144213	II	13583084	MantaDUP:TANDEM:688:0:1:0:0:0	C	<DUP:TANDEM>	999	PASS	END=13583647;SVTYPE=DUP;SVLEN=563;SVINSLEN=1;SVINSSEQ=T	GT:FT:GQ:PL:PR:SR	0/1:PASS:588:999,0,585:30,10:40,29	Tandem Duplication	Heterozygous	P0_N2_treated_hermaphrodite	13583647	II	0	0	0	0	0	rep.1	45361197			0
144213	II	15049162	MantaBND:722:0:0:1:0:0:1	T	[II:15049584[T	605	PASS	SVTYPE=BND;MATEID=MantaBND:722:0:0:1:0:0:0;CIPOS=0,14;HOMLEN=14;HOMSEQ=TAGACAACTTTTTA;BND_DEPTH=58;MATE_BND_DEPTH=73	GT:FT:GQ:PL:PR:SR	0/1:PASS:605:655,0,778:31,5:45,18	Translocation	Heterozygous	P0_N2_treated_hermaphrodite	15049584	II	14	0	14	0	0	rep.1	45361197	4		14
144213	II	15049557	MantaBND:722:0:1:0:0:0:0	T	T]II:15050142]	908	PASS	SVTYPE=BND;MATEID=MantaBND:722:0:1:0:0:0:1;CIPOS=0,2;HOMLEN=2;HOMSEQ=TT;BND_DEPTH=73;MATE_BND_DEPTH=56	GT:FT:GQ:PL:PR:SR	0/1:PASS:700:958,0,697:22,8:46,23	Translocation	Heterozygous	P0_N2_treated_hermaphrodite	15050142	II	2	0	2	0	0	rep.1	45361197	2		2	x		LONGPAL3
144213	II	15049570	MantaBND:722:0:0:1:0:0:0	A	[II:15049176[A	605	PASS	SVTYPE=BND;MATEID=MantaBND:722:0:0:1:0:0:1;CIPOS=0,14;HOMLEN=14;HOMSEQ=AAAAGTTGTCTAAT;BND_DEPTH=73;MATE_BND_DEPTH=58	GT:FT:GQ:PL:PR:SR	0/1:PASS:605:655,0,778:31,5:45,18	Translocation	Heterozygous	P0_N2_treated_hermaphrodite	15049176	II	14	0	14	0	0	rep.1	45361197	4		14
144213	II	15050140	MantaBND:722:0:1:0:0:0:1	A	A]II:15049559]	908	PASS	SVTYPE=BND;MATEID=MantaBND:722:0:1:0:0:0:0;CIPOS=0,2;HOMLEN=2;HOMSEQ=AA;BND_DEPTH=56;MATE_BND_DEPTH=73	GT:FT:GQ:PL:PR:SR	0/1:PASS:700:958,0,697:22,8:46,23	Translocation	Heterozygous	P0_N2_treated_hermaphrodite	15049559	II	2	0	2	0	0	rep.1	45361197	2		2	x	LONGPAL3
144213	III	55714	MantaBND:295:2:3:0:0:0:1	A	]V:12864683]A	811	PASS	SVTYPE=BND;MATEID=MantaBND:295:2:3:0:0:0:0;BND_DEPTH=103;MATE_BND_DEPTH=41	GT:FT:GQ:PL:PR:SR	0/1:PASS:678:861,0,675:7,3:50,20	Translocation	Heterozygous	P0_N2_treated_hermaphrodite	12864683	V	0	0	0	0	0	rep.1	45361197	3		0
144213	III	468056	MantaBND:58:0:1:0:0:0:0	G	G[I:2002703[	541	PASS	SVTYPE=BND;MATEID=MantaBND:58:0:1:0:0:0:1;BND_DEPTH=89;MATE_BND_DEPTH=52	GT:FT:GQ:PL:PR:SR	0/1:PASS:541:591,0,985:36,4:68,17	Translocation	Heterozygous	P0_N2_treated_hermaphrodite	2002703	I	0	0	0	0	0	rep.1	45361197	1		0	x	CEMUDR1	PAL5A_CE
144213	III	498451	MantaDUP:TANDEM:738:0:1:0:0:0	A	<DUP:TANDEM>	833	PASS	END=498982;SVTYPE=DUP;SVLEN=531;CIPOS=0,13;CIEND=0,13;HOMLEN=13;HOMSEQ=TATTTAGCATACC	GT:FT:GQ:PL:PR:SR	0/1:PASS:833:883,0,999:30,3:75,27	Tandem Duplication	Heterozygous	P0_N2_treated_hermaphrodite	498982	III	13	0	13	0	13	rep.1	45361197			13
144213	III	578314	MantaDUP:TANDEM:749:0:1:0:1:0	A	<DUP:TANDEM>	40	PASS	END=578701;SVTYPE=DUP;SVLEN=387;CIPOS=0,37;CIEND=0,37;HOMLEN=37;HOMSEQ=TTAGCAGACCCAAGTATGGTCTGCTAAATATTTAGCA	GT:FT:GQ:PL:PR:SR	0/1:PASS:40:90,0,504:16,2:28,4	Tandem Duplication	Heterozygous	P0_N2_treated_hermaphrodite	578701	III	37	0	37	0	37	rep.1	45361197			37
144213	III	2261463	MantaINS:796:0:0:0:0:0	T	TAAAAATGGGGAATTAGAGTGCGAAGTTAAAGGTGGAGTAGCGTCAGTGTGGA	999	PASS	END=2261463;SVTYPE=INS;SVLEN=52;CIGAR=1M52I;CIPOS=0,2;HOMLEN=2;HOMSEQ=AA	GT:FT:GQ:PL:PR:SR	1/1:PASS:107:999,110,0:0,0:0,40	Insertion	Homozygous	P0_N2_treated_hermaphrodite	2261463	III	2	0	2	0	0	rep.1	45361197			2
144213	III	2738966	MantaBND:802:0:1:0:0:0:0	T	T]X:16224867]	26	PASS	SVTYPE=BND;MATEID=MantaBND:802:0:1:0:0:0:1;IMPRECISE;CIPOS=-105,105;BND_DEPTH=45;MATE_BND_DEPTH=24	GT:FT:GQ:PL:PR	0/1:PASS:26:76,0,324:22,7	Translocation	Heterozygous	P0_N2_treated_hermaphrodite	16224867	X	0	-105	105	0	0	rep.1	45361197	2		105	x
144213	III	3229624	MantaBND:826:0:1:0:0:0:1	T	[III:4670588[TTTGT	867	PASS	SVTYPE=BND;MATEID=MantaBND:826:0:1:0:0:0:0;SVINSLEN=4;SVINSSEQ=TTTG;BND_DEPTH=63;MATE_BND_DEPTH=43	GT:FT:GQ:PL:PR:SR	0/1:PASS:263:917,0,260:4,3:22,28	Translocation	Heterozygous	P0_N2_treated_hermaphrodite	4670588	III	0	0	0	0	0	rep.1	45361197	4	TTTG	0
144213	III	3681028	MantaINS:823:0:0:0:0:0	T	TCTACATAGGCGCACAGGTAGGCATATGTAGTCTTCGCCCTTGTAGGCACACAGGTAGGCCTGTGAGTCCCCCCCCCCTGTGTGCCTACAAGGGCGAAGA	999	PASS	END=3681028;SVTYPE=INS;SVLEN=99;CIGAR=1M99I;CIPOS=0,7;HOMLEN=7;HOMSEQ=CTACATA	GT:FT:GQ:PL:PR:SR	1/1:PASS:67:999,70,0:0,0:0,28	Insertion	Homozygous	P0_N2_treated_hermaphrodite	3681028	III	7	0	7	0	0	rep.1	45361197			7
144213	III	4670559	MantaBND:826:1:2:0:1:0:0	C	C[IV:16571333[	178	PASS	SVTYPE=BND;MATEID=MantaBND:826:1:2:0:1:0:1;CIPOS=0,61;HOMLEN=61;HOMSEQ=CTAGGGCTGTGCAACCGGACGTCCGGTTTTTTCGGACGTCCGAAAAACCGGACGCCGGACG;BND_DEPTH=43;MATE_BND_DEPTH=73	GT:FT:GQ:PL:PR:SR	0/1:PASS:69:228,0,66:5,3:5,9	Translocation	Heterozygous	P0_N2_treated_hermaphrodite	16571333	IV	61	0	61	0	0	rep.1	45361197	1		61		CELE4
144213	III	4670588	MantaBND:826:0:1:0:0:0:0	T	[III:3229624[CAAAT	867	PASS	SVTYPE=BND;MATEID=MantaBND:826:0:1:0:0:0:1;SVINSLEN=4;SVINSSEQ=CAAA;BND_DEPTH=43;MATE_BND_DEPTH=63	GT:FT:GQ:PL:PR:SR	0/1:PASS:263:917,0,260:4,3:22,28	Translocation	Heterozygous	P0_N2_treated_hermaphrodite	3229624	III	0	0	0	0	0	rep.1	45361197	4	CAAA	0
144213	III	4670588	MantaBND:826:1:3:2:1:0:1	T	]V:20705450]T	622	PASS	SVTYPE=BND;MATEID=MantaBND:826:1:3:2:1:0:0;BND_DEPTH=43;MATE_BND_DEPTH=87	GT:FT:GQ:PL:PR:SR	0/1:PASS:173:672,0,170:3,6:20,17	Translocation	Heterozygous	P0_N2_treated_hermaphrodite	20705450	V	0	0	0	0	0	rep.1	45361197	3		0	x
144213	III	9101399	MantaBND:942:0:0:1:0:0:1	G	G]III:9101490]	176	PASS	SVTYPE=BND;MATEID=MantaBND:942:0:0:1:0:0:0;IMPRECISE;CIPOS=-297,297;BND_DEPTH=84;MATE_BND_DEPTH=81	GT:FT:GQ:PL:PR	0/1:PASS:176:226,0,496:35,17	Translocation	Heterozygous	P0_N2_treated_hermaphrodite	9101490	III	0	-297	297	0	0	rep.1	45361197	2		297	x
144213	III	9101490	MantaBND:942:0:0:1:0:0:0	G	G]III:9101399]	176	PASS	SVTYPE=BND;MATEID=MantaBND:942:0:0:1:0:0:1;IMPRECISE;CIPOS=-216,216;BND_DEPTH=81;MATE_BND_DEPTH=84	GT:FT:GQ:PL:PR	0/1:PASS:176:226,0,496:35,17	Translocation	Heterozygous	P0_N2_treated_hermaphrodite	9101399	III	0	-216	216	0	0	rep.1	45361197	2		216	x
144213	III	9938753	MantaDUP:TANDEM:741:2:2:1:1:0	C	<DUP:TANDEM>	35	PASS	END=9938839;SVTYPE=DUP;SVLEN=86;SVINSLEN=7;SVINSSEQ=CCTTGGG	GT:FT:GQ:PL:PR:SR	0/1:PASS:35:85,0,688:8,0:48,5	Tandem Duplication	Heterozygous	P0_N2_treated_hermaphrodite	9938839	III	0	0	0	0	0	rep.1	45361197			0
144213	III	9940669	MantaINS:964:0:0:0:0:0	A	ACATACCAAAAAATAGATTGACATACCAAAAATAGATTGACATACCAAAAATAGATTGACATACAAAAAAAATAGATTGACATACCAAAAAATAGATTGG	999	PASS	END=9940669;SVTYPE=INS;SVLEN=99;CIGAR=1M99I;CIPOS=0,25;HOMLEN=25;HOMSEQ=CATACCAAAAAATAGATTGACATAC	GT:FT:GQ:PL:PR:SR	1/1:PASS:99:999,102,0:0,0:0,38	Insertion	Homozygous	P0_N2_treated_hermaphrodite	9940669	III	25	0	25	0	0	rep.1	45361197			25
144213	III	10557581	MantaINS:976:0:0:0:0:0	A	ACCGCAAGTAGATTCTTTCCGCCGGTTCGAAATTTTCCGCAAGTAGATTTTTCCGCCGGTAGATTTTTCCGGTGGTAGATTCTTTCCGCCGGTTCGAGTTTTT	999	PASS	END=10557581;SVTYPE=INS;SVLEN=102;CIGAR=1M102I;CIPOS=0,36;HOMLEN=36;HOMSEQ=CCGCAAGTAGATTCTTTCCGCCGGTTCGAAATTTTC	GT:FT:GQ:PL:PR:SR	1/1:PASS:127:999,130,0:0,0:0,57	Insertion	Homozygous	P0_N2_treated_hermaphrodite	10557581	III	36	0	36	0	0	rep.1	45361197			36
144213	III	11114378	MantaBND:983:0:1:0:0:0:0	T	T]V:17040204]	462	PASS	SVTYPE=BND;MATEID=MantaBND:983:0:1:0:0:0:1;CIPOS=0,59;HOMLEN=59;HOMSEQ=TCGCTTTTTTCACGGCCACCTCTTCCATTTGAAAACAGGGGGGAAATTAGAAACCCGTG;BND_DEPTH=63;MATE_BND_DEPTH=26	GT:FT:GQ:PL:PR:SR	0/1:PASS:308:512,0,305:17,12:20,9	Translocation	Heterozygous	P0_N2_treated_hermaphrodite	17040204	V	59	0	59	0	0	rep.1	45361197	2		59	x		LINE2F_CE
144213	III	12132024	MantaBND:363:11:14:0:0:0:0	T	T[V:18566359[	50	PASS	SVTYPE=BND;MATEID=MantaBND:363:11:14:0:0:0:1;IMPRECISE;CIPOS=-207,207;BND_DEPTH=71;MATE_BND_DEPTH=38	GT:FT:GQ:PL:PR	0/1:PASS:50:100,0,548:37,12	Translocation	Heterozygous	P0_N2_treated_hermaphrodite	18566359	V	0	-207	207	0	0	rep.1	45361197	1		207	x	(CTTAG)n	(GGCTTA)n
144213	III	12376544	MantaDUP:TANDEM:1007:0:0:2:0:0	C	<DUP:TANDEM>	230	PASS	END=12376674;SVTYPE=DUP;SVLEN=130;CIPOS=0,14;CIEND=0,14;HOMLEN=14;HOMSEQ=TAAAATTTCAAACG	GT:FT:GQ:PL:PR:SR	0/1:PASS:230:280,0,302:7,1:24,9	Tandem Duplication	Heterozygous	P0_N2_treated_hermaphrodite	12376674	III	14	0	14	0	14	rep.1	45361197			14
144213	III	12376545	MantaBND:1007:0:1:2:0:0:1	T	[III:12627387[T	569	PASS	SVTYPE=BND;MATEID=MantaBND:1007:0:1:2:0:0:0;CIPOS=0,20;HOMLEN=20;HOMSEQ=AAAATTTCAAACGAAAATTC;BND_DEPTH=36;MATE_BND_DEPTH=75	GT:FT:GQ:PL:PR:SR	0/1:PASS:454:619,0,451:18,2:26,16	Translocation	Heterozygous	P0_N2_treated_hermaphrodite	12627387	III	20	0	20	0	0	rep.1	45361197	4		20	x
144213	III	12627367	MantaBND:1007:0:1:2:0:0:0	A	[III:12376565[A	569	PASS	SVTYPE=BND;MATEID=MantaBND:1007:0:1:2:0:0:1;CIPOS=0,20;HOMLEN=20;HOMSEQ=ATTTTCGTTTGAAATTTTAA;BND_DEPTH=75;MATE_BND_DEPTH=36	GT:FT:GQ:PL:PR:SR	0/1:PASS:454:619,0,451:18,2:26,16	Translocation	Heterozygous	P0_N2_treated_hermaphrodite	12376565	III	20	0	20	0	0	rep.1	45361197	4		20	x
144213	IV	1312645	MantaBND:1064:0:1:0:0:0:1	G	G]X:216896]	525	PASS	SVTYPE=BND;MATEID=MantaBND:1064:0:1:0:0:0:0;CIPOS=0,8;HOMLEN=8;HOMSEQ=AGATCAAC;BND_DEPTH=47;MATE_BND_DEPTH=24	GT:FT:GQ:PL:PR:SR	0/1:PASS:307:575,0,304:10,4:23,13	Translocation	Heterozygous	P0_N2_treated_hermaphrodite	216896	X	8	0	8	0	0	rep.1	45361197	2		8	x
144213	IV	1950174	MantaDEL:1072:0:1:0:1:0	CCCGTAAATCTACACAATGAGCCTCCGTAAATCTACAGTAATACCCTGTAAATCTACAGTAATCCATCGTAAATCTACAATAAACCCCCGTAAATCTACATAATGAGCCTCCGTAAATCTACATTAACTCCCGTAAATCTACAACATGCTTCCGTAAATCTACACTAGTTCCCCGTAAATCTACACAATCATCCCCCGTAAATCTACAATAAGCTCCCGTAAATCTGCAGTAATACCCCGTAAATTTACAGTAATACCCCGTAAATCTACACAATGAGCCTCCGTAAATCTACATTAACCCCCGTAAATCTACAAAATGCTTCCGTAAATCTTCACAATCATCCCCCGTAAATCTACAATAAGCTCCCGTAAATCTACAGTAATACCCCGTAAATTTAC…	C	27	PASS	END=1950666;SVTYPE=DEL;SVLEN=-492;CIGAR=1M492D;CIPOS=0,13;HOMLEN=13;HOMSEQ=CCGTAAATCTACA	GT:FT:GQ:PL:PR:SR	0/1:PASS:27:77,0,297:11,2:25,4	Deletion	Heterozygous	P0_N2_treated_hermaphrodite	1950666	IV	13	0	13	0	0	rep.1	45361197			13
144213	IV	4816396	MantaBND:1134:0:2:0:1:0:1	A	ATCGACT[V:9724732[	997	PASS	SVTYPE=BND;MATEID=MantaBND:1134:0:2:0:1:0:0;SVINSLEN=6;SVINSSEQ=TCGACT;BND_DEPTH=117;MATE_BND_DEPTH=89	GT:FT:GQ:PL:PR:SR	0/1:PASS:453:999,0,450:18,20:26,27	Translocation	Heterozygous	P0_N2_treated_hermaphrodite	9724732	V	0	0	0	0	0	rep.1	45361197	1	TCGACT	0	x	IR3_CE	CELE14B
144213	IV	4816475	MantaBND:1134:0:2:1:0:0:1	A	A]V:9724749]	147	PASS	SVTYPE=BND;MATEID=MantaBND:1134:0:2:1:0:0:0;IMPRECISE;CIPOS=-165,166;BND_DEPTH=50;MATE_BND_DEPTH=89	GT:FT:GQ:PL:PR	0/1:PASS:147:197,0,259:19,13	Translocation	Heterozygous	P0_N2_treated_hermaphrodite	9724749	V	0	-165	166	0	0	rep.1	45361197	2		166	x	IR3_CE	CELE14B
144213	IV	5950124	MantaINS:137:4:4:0:2:0	T	<INS>	887	PASS	END=5950124;SVTYPE=INS;CIPOS=0,9;CIEND=0,9;HOMLEN=9;HOMSEQ=ACCGGACGC;LEFT_SVINSSEQ=ACCGGACGCACTGCGTCCGGTTTTGGGGTAGGTTTCCACGGCGGCCGACAATTTCCGAGTTTCGCCACTCACTATAGTTAATCAGCAATTTTATAGTG;RIGHT_SVINSSEQ=ACTCACTATAGTTAATCAGCAATTTTATAGTGAGTGGCGAAACTCGGAAATTGTCGGCCGTCGTGGATAGCTACCTCCA	GT:FT:GQ:PL:PR:SR	1/1:PASS:77:940,80,0:0,16:0,12	Insertion	Homozygous	P0_N2_treated_hermaphrodite	5950124	IV	9	0	9	0	9	rep.1	45361197			9
144213	IV	6005750	MantaBND:10:1:2:0:0:0:0	A	[V:10866479[A	175	PASS	SVTYPE=BND;MATEID=MantaBND:10:1:2:0:0:0:1;IMPRECISE;CIPOS=-220,220;BND_DEPTH=132;MATE_BND_DEPTH=133	GT:FT:GQ:PL:PR	0/1:PASS:175:225,0,999:91,26	Translocation	Heterozygous	P0_N2_treated_hermaphrodite	10866479	V	0	-220	220	0	0	rep.1	45361197	4		220
144213	IV	6006456	MantaBND:2:0:1:0:0:0:1	G	G[I:229005[	47	PASS	SVTYPE=BND;MATEID=MantaBND:2:0:1:0:0:0:0;IMPRECISE;CIPOS=-139,140;BND_DEPTH=57;MATE_BND_DEPTH=40	GT:FT:GQ:PL:PR	0/1:PASS:47:97,0,579:39,11	Translocation	Heterozygous	P0_N2_treated_hermaphrodite	229005	I	0	-139	140	0	0	rep.1	45361197	1		140
144213	IV	6320432	MantaBND:1159:0:1:0:0:0:0	T	]V:4914049]TGT	999	PASS	SVTYPE=BND;MATEID=MantaBND:1159:0:1:0:0:0:1;SVINSLEN=2;SVINSSEQ=TG;BND_DEPTH=71;MATE_BND_DEPTH=91	GT:FT:GQ:PL:PR:SR	0/1:PASS:236:999,0,233:11,23:22,36	Translocation	Heterozygous	P0_N2_treated_hermaphrodite	4914049	V	0	0	0	0	0	rep.1	45361197	3	TG	0	x	PALTA3_CE
144213	IV	6470036	MantaBND:157:0:3:0:0:0:1	T	T[I:4548881[	40	PASS	SVTYPE=BND;MATEID=MantaBND:157:0:3:0:0:0:0;IMPRECISE;CIPOS=-112,113;BND_DEPTH=59;MATE_BND_DEPTH=64	GT:FT:GQ:PL:PR	0/1:PASS:40:90,0,521:35,11	Translocation	Heterozygous	P0_N2_treated_hermaphrodite	4548881	I	0	-112	113	0	0	rep.1	45361197	1		113	x		(TTTTAA)n
144213	IV	7485251	MantaINS:1174:0:0:0:3:0	A	<INS>	999	PASS	END=7485251;SVTYPE=INS;CIPOS=0,10;CIEND=0,10;HOMLEN=10;HOMSEQ=GGATCCGAAA;LEFT_SVINSSEQ=GGATCCGAAAAGTATCGAACAAGTGATGACACGTCTACAAATTAGCAAACAATGGAATACACTTCGTGCTCTACTCAACTATGTTCGTTCGAATCAAATGGATTCCATGATCCGCTCGTTCCCGCTTATTTGGTTCCGTGTTTATGAAAATGCCTTGATTGAATTGAATGGTGGATCCATGGCGAATCCAGATTGGAATTACGAACAATGCGTTA;RIGHT_SVINSSEQ=GTGGGCAATGAGCAGCAATGTCGAAGGAGGACGTCAACCAAATATTGCTCGATTCCTCCGTGAAATCAATTGTCCCATCAG…	GT:FT:GQ:PL:PR:SR	1/1:PASS:165:999,168,0:0,2:0,69	Insertion	Homozygous	P0_N2_treated_hermaphrodite	7485251	IV	10	0	10	0	10	rep.1	45361197			10
144213	IV	9852302	MantaDUP:TANDEM:1256:0:1:0:0:0	T	<DUP:TANDEM>	911	PASS	END=9852492;SVTYPE=DUP;SVLEN=190;CIPOS=0,4;CIEND=0,4;HOMLEN=4;HOMSEQ=AAAT	GT:FT:GQ:PL:PR:SR	0/1:PASS:911:961,0,999:40,2:67,39	Tandem Duplication	Heterozygous	P0_N2_treated_hermaphrodite	9852492	IV	4	0	4	0	4	rep.1	45361197			4
144213	IV	12688217	MantaINS:1303:0:0:0:0:0	A	AAAAAATACGATCGCACAAAAATAAACAACGACGCAACGACACTCCGCTGTTTTCAATCCCCGCCCACGATTTCATTTGCACTGCGGCCGCCACATTTCAGTGCAAATGAAATCGTGGCGAGGCTTAAAAATAGCGGAGTGTCGTTGCGTCGTTGTTTATTTTTGTGCGATCGTATTTTTTCTATAATAATT	999	PASS	END=12688217;SVTYPE=INS;SVLEN=191;CIGAR=1M191I;CIPOS=0,7;HOMLEN=7;HOMSEQ=AAAAATA	GT:FT:GQ:PL:PR:SR	1/1:PASS:71:999,74,0:0,5:0,22	Insertion	Homozygous	P0_N2_treated_hermaphrodite	12688217	IV	7	0	7	0	0	rep.1	45361197			7
144213	IV	16571333	MantaBND:826:1:2:0:1:0:1	C	]III:4670559]C	178	PASS	SVTYPE=BND;MATEID=MantaBND:826:1:2:0:1:0:0;CIPOS=0,61;HOMLEN=61;HOMSEQ=TAGGGCTGTGCAACCGGACGTCCGGTTTTTTCGGACGTCCGAAAAACCGGACGCCGGACGC;BND_DEPTH=73;MATE_BND_DEPTH=43	GT:FT:GQ:PL:PR:SR	0/1:PASS:69:228,0,66:5,3:5,9	Translocation	Heterozygous	P0_N2_treated_hermaphrodite	4670559	III	61	0	61	0	0	rep.1	45361197	3		61			CELE4
144213	IV	16571333	MantaBND:826:2:7:0:0:0:1	C	]V:17490437]C	941	PASS	SVTYPE=BND;MATEID=MantaBND:826:2:7:0:0:0:0;CIPOS=0,38;HOMLEN=38;HOMSEQ=TAGGGCTGTGCAACCGGACGTCCGGTTTTTTCGGACGT;EVENT=MantaBND:826:2:7:0:0:0:0;JUNCTION_QUAL=574;BND_DEPTH=73;MATE_BND_DEPTH=35	GT:FT:GQ:PL:PR:SR	0/1:PASS:291:991,0,288:10,4:14,15	Translocation	Heterozygous	P0_N2_treated_hermaphrodite	17490437	V	38	0	38	0	0	rep.1	45361197	3		38	x
144213	IV	16571413	MantaBND:826:2:3:0:2:0:1	T	T[V:20705302[	184	PASS	SVTYPE=BND;MATEID=MantaBND:826:2:3:0:2:0:0;CIPOS=0,19;HOMLEN=19;HOMSEQ=CGGACGCGTGTGCGTCCGG;BND_DEPTH=73;MATE_BND_DEPTH=88	GT:FT:GQ:PL:PR:SR	0/1:PASS:184:234,0,340:18,3:24,15	Translocation	Heterozygous	P0_N2_treated_hermaphrodite	20705302	V	19	0	19	0	0	rep.1	45361197	1		19	x
144213	IV	16571432	MantaBND:826:2:7:1:1:0:0	G	G[V:17490457[	941	PASS	SVTYPE=BND;MATEID=MantaBND:826:2:7:1:1:0:1;EVENT=MantaBND:826:2:7:0:0:0:0;JUNCTION_QUAL=316;BND_DEPTH=73;MATE_BND_DEPTH=35	GT:FT:GQ:PL:PR:SR	0/1:PASS:291:991,0,288:8,3:2,13	Translocation	Heterozygous	P0_N2_treated_hermaphrodite	17490457	V	0	0	0	0	0	rep.1	45361197	1		0	x
144213	IV	16780741	MantaDEL:1403:0:1:0:0:0	A	<DEL>	72	PASS	END=16784501;SVTYPE=DEL;SVLEN=-3760;IMPRECISE;CIPOS=-139,140;CIEND=-115,115	GT:FT:GQ:PL:PR	0/1:PASS:72:122,0,458:31,11	Deletion	Heterozygous	P0_N2_treated_hermaphrodite	16784501	IV	0	-139	140	-115	115	rep.1	45361197			140
144213	V	226036	MantaINS:1425:0:0:0:0:0	T	TGGAGCGCGGACGGGGCGCGACTAGACACGGGTTCGCGCTCCAGTCACCCTTTTTTTCGCGCTCCTTACGCGCCACGTCCGCGCTCCAATCGCGTTTGCTCCGCGCGCATTCCGAATTTGAAAAATTCTTACGAAATTTTATGGGACGCGATCAGAGCGCCAACGTGGCGCGGAAGGAGCGCGAAAAAACGTGTGACTGGAGCGCCAACCCGTAATCTAGTCGCGCCCCGTCCGCGCTCCTGGA	999	PASS	END=226036;SVTYPE=INS;SVLEN=243;CIGAR=1M243I;CIPOS=0,6;HOMLEN=6;HOMSEQ=GGAGCG	GT:FT:GQ:PL:PR:SR	1/1:PASS:92:999,95,0:0,10:0,26	Insertion	Homozygous	P0_N2_treated_hermaphrodite	226036	V	6	0	6	0	0	rep.1	45361197			6
144213	V	686153	MantaBND:392:0:1:0:0:0:0	T	]II:2141116]T	999	PASS	SVTYPE=BND;MATEID=MantaBND:392:0:1:0:0:0:1;CIPOS=0,12;HOMLEN=12;HOMSEQ=TAACAAGGAAAG;BND_DEPTH=97;MATE_BND_DEPTH=74	GT:FT:GQ:PL:PR:SR	0/1:PASS:333:999,0,330:17,10:22,31	Translocation	Heterozygous	P0_N2_treated_hermaphrodite	2141116	II	12	0	12	0	0	rep.1	45361197	3		12	x
144213	V	1772177	MantaBND:73:0:1:0:0:0:0	A	[I:2295529[A	568	PASS	SVTYPE=BND;MATEID=MantaBND:73:0:1:0:0:0:1;CIPOS=0,27;HOMLEN=27;HOMSEQ=GCGCGCTCTAATAATTATTCGGCTTTG;BND_DEPTH=46;MATE_BND_DEPTH=80	GT:FT:GQ:PL:PR:SR	0/1:PASS:456:618,0,453:19,4:25,15	Translocation	Heterozygous	P0_N2_treated_hermaphrodite	2295529	I	27	0	27	0	0	rep.1	45361197	4		27
144213	V	4248545	MantaBND:137:5:6:0:0:0:1	T	T]I:14340296]	607	PASS	SVTYPE=BND;MATEID=MantaBND:137:5:6:0:0:0:0;CIPOS=0,7;HOMLEN=7;HOMSEQ=GCACTGC;BND_DEPTH=52;MATE_BND_DEPTH=21	GT:FT:GQ:PL:PR:SR	0/1:PASS:104:657,0,101:6,3:8,16	Translocation	Heterozygous	P0_N2_treated_hermaphrodite	14340296	I	7	0	7	0	0	rep.1	45361197	2		7
144213	V	4914049	MantaBND:1159:0:1:0:0:0:1	A	ATG[IV:6320432[	999	PASS	SVTYPE=BND;MATEID=MantaBND:1159:0:1:0:0:0:0;SVINSLEN=2;SVINSSEQ=TG;BND_DEPTH=91;MATE_BND_DEPTH=71	GT:FT:GQ:PL:PR:SR	0/1:PASS:236:999,0,233:11,23:22,36	Translocation	Heterozygous	P0_N2_treated_hermaphrodite	6320432	IV	0	0	0	0	0	rep.1	45361197	1	TG	0	x		PALTA3_CE
144213	V	8119420	MantaDUP:TANDEM:1563:0:1:0:0:0	C	<DUP:TANDEM>	130	PASS	END=8122292;SVTYPE=DUP;SVLEN=2872;IMPRECISE;CIPOS=-245,245;CIEND=-182,182	GT:FT:GQ:PL:PR	0/1:PASS:130:180,0,703:48,18	Tandem Duplication	Heterozygous	P0_N2_treated_hermaphrodite	8122292	V	0	-245	245	-182	182	rep.1	45361197			245
144213	V	9554018	MantaBND:78:3:4:0:0:0:0	A	A]X:466278]	999	PASS	SVTYPE=BND;MATEID=MantaBND:78:3:4:0:0:0:1;CIPOS=0,36;HOMLEN=36;HOMSEQ=TTCTCGGCATTTCGTGCCTACTTTCTCCCACCTTTT;BND_DEPTH=45;MATE_BND_DEPTH=133	GT:FT:GQ:PL:PR:SR	0/1:PASS:350:999,0,347:19,14:18,20	Translocation	Heterozygous	P0_N2_treated_hermaphrodite	466278	X	36	0	36	0	0	rep.1	45361197	2		36	x
144213	V	9554051	MantaBND:78:1:3:0:0:0:0	T	[X:466019[T	971	PASS	SVTYPE=BND;MATEID=MantaBND:78:1:3:0:0:0:1;CIPOS=0,37;HOMLEN=37;HOMSEQ=TTTCGCCTTCCGGCAAAAAGGTGGGAGAAAGAAGACG;BND_DEPTH=33;MATE_BND_DEPTH=89	GT:FT:GQ:PL:PR:SR	0/1:PASS:375:999,0,372:15,9:27,25	Translocation	Heterozygous	P0_N2_treated_hermaphrodite	466019	X	37	0	37	0	0	rep.1	45361197	4		37	x
144213	V	9724732	MantaBND:1134:0:2:0:1:0:0	A	]IV:4816396]TCGACTA	997	PASS	SVTYPE=BND;MATEID=MantaBND:1134:0:2:0:1:0:1;SVINSLEN=6;SVINSSEQ=TCGACT;BND_DEPTH=89;MATE_BND_DEPTH=117	GT:FT:GQ:PL:PR:SR	0/1:PASS:453:999,0,450:18,20:26,27	Translocation	Heterozygous	P0_N2_treated_hermaphrodite	4816396	IV	0	0	0	0	0	rep.1	45361197	3	TCGACT	0	x	CELE14B	IR3_CE
144213	V	9724749	MantaBND:1134:0:2:1:0:0:0	T	T]IV:4816475]	147	PASS	SVTYPE=BND;MATEID=MantaBND:1134:0:2:1:0:0:1;IMPRECISE;CIPOS=-222,223;BND_DEPTH=89;MATE_BND_DEPTH=50	GT:FT:GQ:PL:PR	0/1:PASS:147:197,0,259:19,13	Translocation	Heterozygous	P0_N2_treated_hermaphrodite	4816475	IV	0	-222	223	0	0	rep.1	45361197	2		223	x	CELE14B	IR3_CE
144213	V	10866479	MantaBND:10:1:2:0:0:0:1	A	[IV:6005750[A	175	PASS	SVTYPE=BND;MATEID=MantaBND:10:1:2:0:0:0:0;IMPRECISE;CIPOS=-315,315;BND_DEPTH=133;MATE_BND_DEPTH=132	GT:FT:GQ:PL:PR	0/1:PASS:175:225,0,999:91,26	Translocation	Heterozygous	P0_N2_treated_hermaphrodite	6005750	IV	0	-315	315	0	0	rep.1	45361197	4		315
144213	V	10866741	MantaBND:10:0:1:0:0:0:0	C	C]I:238556]	154	PASS	SVTYPE=BND;MATEID=MantaBND:10:0:1:0:0:0:1;IMPRECISE;CIPOS=-264,264;BND_DEPTH=116;MATE_BND_DEPTH=100	GT:FT:GQ:PL:PR	0/1:PASS:154:204,0,906:61,19	Translocation	Heterozygous	P0_N2_treated_hermaphrodite	238556	I	0	-264	264	0	0	rep.1	45361197	2		264	x
144213	V	11690781	MantaINS:1645:0:0:0:0:0	A	AAAAATTTTCAATAAAAAATCAAATAAATAAATAAATAAATATGCTGATAAAAACACACAAACTATTGAATTGATATCACTGATAAAATAATAAAGAATAATCAGTCTTGCTTTGGAATTTTTATTCAAAAATCAAGACTGATTATTCTTTATTATTTTATCAGTGATATCAATTCAATAGTTTGTGTGTTTTTATCAGCATATTTATTTATTTATTTATTTGATTTTTTATTGAAAATTTTTTATTG	999	PASS	END=11690781;SVTYPE=INS;SVLEN=247;CIGAR=1M247I;CIPOS=0,8;HOMLEN=8;HOMSEQ=AAAATTTT	GT:FT:GQ:PL:PR:SR	1/1:PASS:184:999,187,0:0,4:0,67	Insertion	Homozygous	P0_N2_treated_hermaphrodite	11690781	V	8	0	8	0	0	rep.1	45361197			8
144213	V	12167424	MantaINS:1646:0:0:0:0:0	C	CCCTGGTGGTCCTGGTGGTCCGGCTGGGCATGTGATGCAAGCAGAAGCAGATGAGTGTTGTTCAGCAACTCCAGCTCCTCCAGCTTGTCCATCACCTCCTGGTTCTCCTGCCTCTCCTGGAGCACCATCCTCT	999	PASS	END=12167424;SVTYPE=INS;SVLEN=132;CIGAR=1M132I;CIPOS=0,20;HOMLEN=20;HOMSEQ=CCTGGTGGTCCTGGTGGTCC	GT:FT:GQ:PL:PR:SR	1/1:PASS:153:999,156,0:0,1:0,66	Insertion	Homozygous	P0_N2_treated_hermaphrodite	12167424	V	20	0	20	0	0	rep.1	45361197			20
144213	V	12864683	MantaBND:295:2:3:0:0:0:0	A	A[III:55714[	811	PASS	SVTYPE=BND;MATEID=MantaBND:295:2:3:0:0:0:1;BND_DEPTH=41;MATE_BND_DEPTH=103	GT:FT:GQ:PL:PR:SR	0/1:PASS:678:861,0,675:7,3:50,20	Translocation	Heterozygous	P0_N2_treated_hermaphrodite	55714	III	0	0	0	0	0	rep.1	45361197	1		0
144213	V	13362655	MantaDUP:TANDEM:1665:0:1:0:0:0	T	<DUP:TANDEM>	999	PASS	END=13367099;SVTYPE=DUP;SVLEN=4444;CIPOS=0,2;CIEND=0,2;HOMLEN=2;HOMSEQ=AT	GT:FT:GQ:PL:PR:SR	0/1:PASS:999:999,0,999:41,24:81,35	Tandem Duplication	Heterozygous	P0_N2_treated_hermaphrodite	13367099	V	2	0	2	0	2	rep.1	45361197			2
144213	V	17040145	MantaBND:983:0:1:0:0:0:1	A	A]III:11114437]	462	PASS	SVTYPE=BND;MATEID=MantaBND:983:0:1:0:0:0:0;CIPOS=0,59;HOMLEN=59;HOMSEQ=CACGGGTTTCTAATTTCCCCCCTGTTTTCAAATGGAAGAGGTGGCCGTGAAAAAAGCGA;BND_DEPTH=26;MATE_BND_DEPTH=63	GT:FT:GQ:PL:PR:SR	0/1:PASS:308:512,0,305:17,12:20,9	Translocation	Heterozygous	P0_N2_treated_hermaphrodite	11114437	III	59	0	59	0	0	rep.1	45361197	2		59	x	LINE2F_CE
144213	V	17490437	MantaBND:826:2:7:0:0:0:0	G	G[IV:16571333[	941	PASS	SVTYPE=BND;MATEID=MantaBND:826:2:7:0:0:0:1;CIPOS=0,38;HOMLEN=38;HOMSEQ=CTAGGGCTGTGCAACCGGACGTCCGGTTTTTTCGGACG;EVENT=MantaBND:826:2:7:0:0:0:0;JUNCTION_QUAL=574;BND_DEPTH=35;MATE_BND_DEPTH=73	GT:FT:GQ:PL:PR:SR	0/1:PASS:291:991,0,288:10,4:14,15	Translocation	Heterozygous	P0_N2_treated_hermaphrodite	16571333	IV	38	0	38	0	0	rep.1	45361197	1		38	x
144213	V	17490457	MantaBND:826:2:7:1:1:0:1	C	]IV:16571432]C	941	PASS	SVTYPE=BND;MATEID=MantaBND:826:2:7:1:1:0:0;EVENT=MantaBND:826:2:7:0:0:0:0;JUNCTION_QUAL=316;BND_DEPTH=35;MATE_BND_DEPTH=73	GT:FT:GQ:PL:PR:SR	0/1:PASS:291:991,0,288:8,3:2,13	Translocation	Heterozygous	P0_N2_treated_hermaphrodite	16571432	IV	0	0	0	0	0	rep.1	45361197	3		0	x
144213	V	18566359	MantaBND:363:11:14:0:0:0:1	A	]III:12132024]A	50	PASS	SVTYPE=BND;MATEID=MantaBND:363:11:14:0:0:0:0;IMPRECISE;CIPOS=-98,98;BND_DEPTH=38;MATE_BND_DEPTH=71	GT:FT:GQ:PL:PR	0/1:PASS:50:100,0,548:37,12	Translocation	Heterozygous	P0_N2_treated_hermaphrodite	12132024	III	0	-98	98	0	0	rep.1	45361197	3		98	x	(GGCTTA)n	(CTTAG)n
144213	V	18681667	MantaDEL:1812:0:0:0:0:0	CCAAAAAATTTCAAAATTCAAAAAATTTCAAAAATTTCAAAAATTTCAAAAATTCTAAAAATTTCAAAATTCCTT	C	130	PASS	END=18681741;SVTYPE=DEL;SVLEN=-74;CIGAR=1M74D;CIPOS=0,18;HOMLEN=18;HOMSEQ=CAAAAAATTTCAAAATTC	GT:FT:GQ:PL:PR:SR	0/1:PASS:130:180,0,529:11,0:41,10	Deletion	Heterozygous	P0_N2_treated_hermaphrodite	18681741	V	18	0	18	0	0	rep.1	45361197			18
144213	V	18682059	MantaDEL:1816:0:0:0:0:0	TAAAATTTCAAAATTCCAAAAAATTTAAAAAATTAAAAATTCCACAAAATTTCAAAATTCCAAAAAATTTCAAAATTCCACAAAATTTCAAAATTCCAAAAAATTTCTAAATTTCTAAAATTTCAAAATTCCAAAAAATTTAAAAAATTAAAAATTCCACAAAATTTCAAAATTCCAAAAAATTTCAAAATTCCAC	T	242	PASS	END=18682254;SVTYPE=DEL;SVLEN=-195;CIGAR=1M195D;CIPOS=0,24;HOMLEN=24;HOMSEQ=AAAATTTCAAAATTCCAAAAAATT	GT:FT:GQ:PL:PR:SR	0/1:PASS:242:292,0,398:17,2:51,10	Deletion	Heterozygous	P0_N2_treated_hermaphrodite	18682254	V	24	0	24	0	0	rep.1	45361197			24
144213	V	19800132	MantaINS:1819:0:1:0:0:0	G	GTTGAATTCCTGCCAAAAAAATTTTCTTCAAAAATTTTAATTTCCAGCCAAAATGTTTTTTTTCCGAAAATTTAAGTTTCCCGCTAAAATATTTTTCTCAAAAATTTTAATTTTCCGCCAAAAAATTTTCCAGAAAGTTTGAATTTCTTCAAAAAAT	649	PASS	END=19800132;SVTYPE=INS;SVLEN=156;CIGAR=1M156I;CIPOS=0,53;HOMLEN=53;HOMSEQ=TTGAATTCCTGCCAAAAAAATTTTCTTCAAAAATTTTAATTTCCAGCCAAAAT	GT:FT:GQ:PL:PR:SR	1/1:PASS:50:702,53,0:0,2:0,25	Insertion	Homozygous	P0_N2_treated_hermaphrodite	19800132	V	53	0	53	0	0	rep.1	45361197			53
144213	V	19877606	MantaDEL:311:1:1:2:0:0	TTTTTTTTCATCACACTTAATTAAAAAATTCATATTCTTCATGAAATTCTACACATTTCCCAATTTGGAA	TGAAT	716	PASS	END=19877675;SVTYPE=DEL;SVLEN=-69;CIGAR=1M4I69D	GT:FT:GQ:PL:PR:SR	0/1:PASS:354:766,0,351:6,0:27,22	Deletion	Heterozygous	P0_N2_treated_hermaphrodite	19877675	V	0	0	0	0	0	rep.1	45361197			0
144213	V	20398658	MantaINS:1818:0:0:0:0:0	GGATT	GCGATTTTTAGAAATTTTGTGGAATTTTAGAACGTTTTTAAGAGTTTTTTGTGAATTTTTGGAACTTATTGAGGTTTTTAGGGATTCTTTTTTTGCAATTTTTGCGGACTTTTTGGAGGTTTTGGGAGAAATTTTGAGCGTTTTGGAAGGTTTTTAGACGATTTTTTTTGCAAATTTTGGAGATTTTTAGTATATTTTTCAATTTTAATCGGAATTTTAGAGAGAATCAGAAGGTTTTTGGGAGTTTTTTTTGCGAATTTTTGGAACTTTCTGAGGTTTTTAGAGA	902	PASS	END=20398662;SVTYPE=INS;SVLEN=285;CIGAR=1M285I4D	GT:FT:GQ:PL:PR:SR	1/1:PASS:23:955,26,0:3,0:1,24	Insertion	Homozygous	P0_N2_treated_hermaphrodite	20398662	V	0	0	0	0	0	rep.1	45361197			0
144213	V	20705302	MantaBND:826:2:3:0:2:0:0	C	]IV:16571413]C	184	PASS	SVTYPE=BND;MATEID=MantaBND:826:2:3:0:2:0:1;CIPOS=0,19;HOMLEN=19;HOMSEQ=GGACGCGTGTGCGTCCGGC;BND_DEPTH=88;MATE_BND_DEPTH=73	GT:FT:GQ:PL:PR:SR	0/1:PASS:184:234,0,340:18,3:24,15	Translocation	Heterozygous	P0_N2_treated_hermaphrodite	16571413	IV	19	0	19	0	0	rep.1	45361197	3		19	x
144213	V	20705450	MantaBND:826:1:3:2:1:0:0	A	A[III:4670588[	622	PASS	SVTYPE=BND;MATEID=MantaBND:826:1:3:2:1:0:1;BND_DEPTH=87;MATE_BND_DEPTH=43	GT:FT:GQ:PL:PR:SR	0/1:PASS:173:672,0,170:3,6:20,17	Translocation	Heterozygous	P0_N2_treated_hermaphrodite	4670588	III	0	0	0	0	0	rep.1	45361197	1		0	x
144213	X	216877	MantaBND:1064:1:2:1:0:0:1	C	[X:256044[C	531	PASS	SVTYPE=BND;MATEID=MantaBND:1064:1:2:1:0:0:0;IMPRECISE;CIPOS=-111,111;EVENT=MantaBND:1064:1:2:0:0:0:0;JUNCTION_QUAL=5;BND_DEPTH=24;MATE_BND_DEPTH=28	GT:FT:GQ:PL:PR	1/1:PASS:47:584,50,0:0,3	Translocation	Homozygous	P0_N2_treated_hermaphrodite	256044	X	0	-111	111	0	0	rep.1	45361197	4		111	x
144213	X	216888	MantaBND:1064:0:1:0:0:0:0	T	T]IV:1312653]	525	PASS	SVTYPE=BND;MATEID=MantaBND:1064:0:1:0:0:0:1;CIPOS=0,8;HOMLEN=8;HOMSEQ=GTTGATCT;BND_DEPTH=24;MATE_BND_DEPTH=47	GT:FT:GQ:PL:PR:SR	0/1:PASS:307:575,0,304:10,4:23,13	Translocation	Heterozygous	P0_N2_treated_hermaphrodite	1312653	IV	8	0	8	0	0	rep.1	45361197	2		8	x
144213	X	216891	MantaBND:1064:1:2:0:0:0:0	T	T]X:256071]	531	PASS	SVTYPE=BND;MATEID=MantaBND:1064:1:2:0:0:0:1;CIPOS=0,5;HOMLEN=5;HOMSEQ=GATCT;EVENT=MantaBND:1064:1:2:0:0:0:0;JUNCTION_QUAL=475;BND_DEPTH=24;MATE_BND_DEPTH=28	GT:FT:GQ:PL:PR:SR	1/1:PASS:47:584,50,0:0,10:0,7	Translocation	Homozygous	P0_N2_treated_hermaphrodite	256071	X	5	0	5	0	0	rep.1	45361197	2		5	x
144213	X	256044	MantaBND:1064:1:2:1:0:0:0	T	[X:216877[T	531	PASS	SVTYPE=BND;MATEID=MantaBND:1064:1:2:1:0:0:1;IMPRECISE;CIPOS=-130,130;EVENT=MantaBND:1064:1:2:0:0:0:0;JUNCTION_QUAL=5;BND_DEPTH=28;MATE_BND_DEPTH=24	GT:FT:GQ:PL:PR	1/1:PASS:47:584,50,0:0,3	Translocation	Homozygous	P0_N2_treated_hermaphrodite	216877	X	0	-130	130	0	0	rep.1	45361197	4		130	x
144213	X	256066	MantaBND:1064:1:2:0:0:0:1	G	G]X:216896]	531	PASS	SVTYPE=BND;MATEID=MantaBND:1064:1:2:0:0:0:0;CIPOS=0,5;HOMLEN=5;HOMSEQ=AGATC;EVENT=MantaBND:1064:1:2:0:0:0:0;JUNCTION_QUAL=475;BND_DEPTH=28;MATE_BND_DEPTH=24	GT:FT:GQ:PL:PR:SR	1/1:PASS:47:584,50,0:0,10:0,7	Translocation	Homozygous	P0_N2_treated_hermaphrodite	216896	X	5	0	5	0	0	rep.1	45361197	2		5	x
144213	X	465982	MantaBND:78:1:3:0:0:0:1	G	[V:9554088[G	971	PASS	SVTYPE=BND;MATEID=MantaBND:78:1:3:0:0:0:0;CIPOS=0,37;HOMLEN=37;HOMSEQ=TCTTCTTTCTCCCACCTTTTTGCCGGAAGGCGAAAAA;BND_DEPTH=89;MATE_BND_DEPTH=33	GT:FT:GQ:PL:PR:SR	0/1:PASS:375:999,0,372:15,9:27,25	Translocation	Heterozygous	P0_N2_treated_hermaphrodite	9554088	V	37	0	37	0	0	rep.1	45361197	4		37	x
144213	X	466044	MantaBND:78:0:1:0:0:0:0	G	]I:2652464]G	885	PASS	SVTYPE=BND;MATEID=MantaBND:78:0:1:0:0:0:1;CIPOS=0,4;HOMLEN=4;HOMSEQ=TGGT;BND_DEPTH=108;MATE_BND_DEPTH=36	GT:FT:GQ:PL:PR:SR	0/1:PASS:331:935,0,328:16,5:29,24	Translocation	Heterozygous	P0_N2_treated_hermaphrodite	2652464	I	4	0	4	0	0	rep.1	45361197	3		4	x
144213	X	466242	MantaBND:78:3:4:0:0:0:1	A	A]V:9554054]	999	PASS	SVTYPE=BND;MATEID=MantaBND:78:3:4:0:0:0:0;CIPOS=0,36;HOMLEN=36;HOMSEQ=AAAAGGTGGGAGAAAGTAGGCACGAAATGCCGAGAA;BND_DEPTH=133;MATE_BND_DEPTH=45	GT:FT:GQ:PL:PR:SR	0/1:PASS:350:999,0,347:19,14:18,20	Translocation	Heterozygous	P0_N2_treated_hermaphrodite	9554054	V	36	0	36	0	0	rep.1	45361197	2		36	x
144213	X	1417312	MantaBND:1866:0:1:0:0:0:0	C	C]X:14966896]	462	PASS	SVTYPE=BND;MATEID=MantaBND:1866:0:1:0:0:0:1;CIPOS=0,31;HOMLEN=31;HOMSEQ=CTGTACAGAAAAGAGTTCCAAAACTCTTTTC;BND_DEPTH=70;MATE_BND_DEPTH=86	GT:FT:GQ:PL:PR:SR	0/1:PASS:462:512,0,576:23,1:32,21	Translocation	Heterozygous	P0_N2_treated_hermaphrodite	14966896	X	31	0	31	0	0	rep.1	45361197	2		31
144213	X	1887948	MantaBND:274:0:1:0:0:0:1	T	T]I:11713576]	312	PASS	SVTYPE=BND;MATEID=MantaBND:274:0:1:0:0:0:0;BND_DEPTH=95;MATE_BND_DEPTH=91	GT:FT:GQ:PL:PR:SR	0/1:PASS:312:362,0,999:38,4:80,22	Translocation	Heterozygous	P0_N2_treated_hermaphrodite	11713576	I	0	0	0	0	0	rep.1	45361197	2		0	x
144213	X	3301753	MantaINS:1893:1:1:0:0:0	T	TGATCTAGGTTTGTTATAAAACGTGAATTTTTTTAATTTGCACGGATGATTACGGAGAATGACTGTTCTAGATAAGAAATCGAGTTTTAAAACGAGCATCTTCATAAAATTGTGAAGACATTTTGATTTCACTTTGAAAGTTGGCAAAAATGAAATTTCATGTTCCTAGAAATTTATTATTAATGATATTTCTATTCTTGTTTTTTGATGTTATCTCACAAATTCAAACTGCAACATTTTCTGTTCTATCCGAGATTATGACAGAAATGAATAATCACACCTTGAGCAATCATTTTGGAATTGTACCCACTGACACAAAGTAAGTTCATGTTTGGGGGTGTTACA	999	PASS	END=3301753;SVTYPE=INS;SVLEN=344;CIGAR=1M344I;CIPOS=0,4;HOMLEN=4;HOMSEQ=GATC	GT:FT:GQ:PL:PR:SR	1/1:PASS:165:999,168,0:0,5:0,66	Insertion	Homozygous	P0_N2_treated_hermaphrodite	3301753	X	4	0	4	0	0	rep.1	45361197			4
144213	X	6833298	MantaINS:1958:0:0:0:0:0	T	TCTAAACTTGGGCAAAAGTTAGGCAAAACTTTGGCAAGAGTTGGGTGAAACTTGGGTTAGACTTTGGTAAAGCTTGAATCCAAGTTTTGCCAAAGTCTTGCCTAACTTTTGCCCAAGTTTAGACAGCTTCTGATCCAAGTTAATATTTTTTGGG	784	PASS	END=6833298;SVTYPE=INS;SVLEN=153;CIGAR=1M153I;CIPOS=0,14;HOMLEN=14;HOMSEQ=CTAAACTTGGGCAA	GT:FT:GQ:PL:PR:SR	1/1:PASS:39:837,42,0:0,4:7,24	Insertion	Homozygous	P0_N2_treated_hermaphrodite	6833298	X	14	0	14	0	0	rep.1	45361197			14
144213	X	8429683	MantaINS:1984:0:0:0:0:0	G	GCGTCCGGTCGTCCGAACCGGACGCACATGCGTCCGGTTGGGGGTAGGTTCCCACGGCGGCCGACAATTTCCGAGTTTCGCCACTCACTATACTTAATCAGTAATTTTATAGTGAGTGGCGAAACTCGGAAATTGTCGGCCGTCGTGGATAGCTACCCCCAACCGGACGCATGTGCGTCCGGTTCGGACGACCGGA	999	PASS	END=8429683;SVTYPE=INS;SVLEN=195;CIGAR=1M195I;CIPOS=0,8;HOMLEN=8;HOMSEQ=CGTCCGGT	GT:FT:GQ:PL:PR:SR	1/1:PASS:102:999,105,0:0,19:0,23	Insertion	Homozygous	P0_N2_treated_hermaphrodite	8429683	X	8	0	8	0	0	rep.1	45361197			8
144213	X	12190992	MantaBND:2073:0:1:0:0:0:1	C	C]X:12199124]	999	PASS	SVTYPE=BND;MATEID=MantaBND:2073:0:1:0:0:0:0;CIPOS=0,4;HOMLEN=4;HOMSEQ=GATC;BND_DEPTH=63;MATE_BND_DEPTH=68	GT:FT:GQ:PL:PR:SR	1/1:PASS:157:999,160,0:0,19:0,54	Translocation	Homozygous	P0_N2_treated_hermaphrodite	12199124	X	4	0	4	0	0	rep.1	45361197	2		4	x
144213	X	12199120	MantaBND:2073:0:1:0:0:0:0	T	T]X:12190996]	999	PASS	SVTYPE=BND;MATEID=MantaBND:2073:0:1:0:0:0:1;CIPOS=0,4;HOMLEN=4;HOMSEQ=GATC;BND_DEPTH=68;MATE_BND_DEPTH=63	GT:FT:GQ:PL:PR:SR	1/1:PASS:157:999,160,0:0,19:0,54	Translocation	Homozygous	P0_N2_treated_hermaphrodite	12190996	X	4	0	4	0	0	rep.1	45361197	2		4	x
144213	X	12276513	MantaINS:294:3:3:1:0:0	TATT	TTATATATTAATTAAATAAATAAATATATATTAATTAAATAAATAAATAAATATTAAATATTTTTTTAATTAATATTTTTTAATTTAATTAATATTTATTTTATTAATTAATATTTTTTTATTTAAATAA	333	PASS	END=12276516;SVTYPE=INS;SVLEN=129;CIGAR=1M129I3D	GT:FT:GQ:PL:PR:SR	0/1:PASS:333:383,0,398:1,0:33,10	Insertion	Heterozygous	P0_N2_treated_hermaphrodite	12276516	X	0	0	0	0	0	rep.1	45361197			0
144213	X	12276603	MantaINS:294:3:3:0:0:0	TC	TTTATTTTATTAACATTTATTTATTTTATTAATTAATATTTATTTATTTAATTAATATTTATTTATTTAATTAATGTTTATTTATTTAATTAATATTTATTTAATTAATTAATATTTATTTATTTAATTAGTATTTATTTTTTTAATTAATATTTTTTAATTTAATTAATATTTATTTTATTAATTAATATTTTTTTATTTAAATAATATTTATTTATTTAATTAGTATTTATTTATTTAATTAATATTTATTTTATTAATTAATATTTATTTATTTAAATAATATTTATT	959	PASS	END=12276604;SVTYPE=INS;SVLEN=290;CIGAR=1M290I1D	GT:FT:GQ:PL:PR:SR	1/1:PASS:36:999,39,0:2,0:0,34	Insertion	Homozygous	P0_N2_treated_hermaphrodite	12276604	X	0	0	0	0	0	rep.1	45361197			0
144213	X	12278790	MantaDEL:294:3:3:37:0:0	CCATCGGTGATAAAGTGGTGCTTTTTGGTGCTCCATCGGTGATAAAGTGGTGCTTTTTGGTGCTCCATCGGTGCTAAATTGGTGCTAT	CTA	184	PASS	END=12278877;SVTYPE=DEL;SVLEN=-87;CIGAR=1M2I87D	GT:FT:GQ:PL:PR:SR	0/1:PASS:184:234,0,622:21,0:113,9	Deletion	Heterozygous	P0_N2_treated_hermaphrodite	12278877	X	0	0	0	0	0	rep.1	45361197			0
144213	X	14788284	MantaDEL:2127:0:1:0:0:0	TGCGTCCGGTTTGGGGTAGCTTTCCATGGCGGCCGACAATTTCCGAGTTTCGCCACTGACTATAAAATTGCTGATTAAGTATAGTTAGTCGAGAAACTCGGAAATTGTCGGCCGCCGTGAAAAGCTACCCCAAACCGGACACATGG	T	376	PASS	END=14788429;SVTYPE=DEL;SVLEN=-145;CIGAR=1M145D;CIPOS=0,9;HOMLEN=9;HOMSEQ=GCGTCCGGT	GT:FT:GQ:PL:PR:SR	0/1:PASS:374:426,0,375:10,0:27,13	Deletion	Heterozygous	P0_N2_treated_hermaphrodite	14788429	X	9	0	9	0	0	rep.1	45361197			9
144213	X	14966865	MantaBND:1866:0:1:0:0:0:1	G	G]X:1417343]	462	PASS	SVTYPE=BND;MATEID=MantaBND:1866:0:1:0:0:0:0;CIPOS=0,31;HOMLEN=31;HOMSEQ=GAAAAGAGTTTTGGAACTCTTTTCTGTACAG;BND_DEPTH=86;MATE_BND_DEPTH=70	GT:FT:GQ:PL:PR:SR	0/1:PASS:462:512,0,576:23,1:32,21	Translocation	Heterozygous	P0_N2_treated_hermaphrodite	1417343	X	31	0	31	0	0	rep.1	45361197	2		31	x
144213	X	15750402	MantaINS:295:8:8:0:2:0	G	<INS>	999	PASS	END=15750402;SVTYPE=INS;CIPOS=0,11;CIEND=0,11;HOMLEN=11;HOMSEQ=GTAAGTTTTCA;LEFT_SVINSSEQ=GTAAGTTTTCAAGAATGGGCTCATAAAACTTGTTGTCTCCAGTGGCATATAACTCTGCGGAAAAAAATCCAATAAAAAAAGAACCACTAACGAGTTGCAGATAATGATCTAATCAACAACTTCTCAGTTGAAAACTTTTTGTCAAAAAAATTGTTGGCCGAGTTAAGAGTGCTTGAAAAAAGCGGCAAAAAGCTTAAATATTCCTGAAATTCTCATGTCCAAACCTCGGCCAACAATTTTTTTGACAAAAAGTTTTCAACTGAGAAGTTGTTGATTAGATCATTATCTGCAACTTGTTAGTGATTCATTT…	GT:FT:GQ:PL:PR:SR	1/1:PASS:112:999,115,0:0,10:0,29	Insertion	Homozygous	P0_N2_treated_hermaphrodite	15750402	X	11	0	11	0	11	rep.1	45361197			11
144213	X	16224867	MantaBND:802:0:1:0:0:0:1	G	G]III:2738966]	26	PASS	SVTYPE=BND;MATEID=MantaBND:802:0:1:0:0:0:0;IMPRECISE;CIPOS=-232,233;BND_DEPTH=24;MATE_BND_DEPTH=45	GT:FT:GQ:PL:PR	0/1:PASS:26:76,0,324:22,7	Translocation	Heterozygous	P0_N2_treated_hermaphrodite	2738966	III	0	-232	233	0	0	rep.1	45361197	2		233	x
144213	X	16224891	MantaINS:802:1:1:0:0:0	G	GCGGCCCCGACCCACTTTTTGGGTCGGGGTCACGTCCCCGACCCACTATTTGGGTCGGGGTCGCGTCCCCGACCCATTGTTTGGGTCGGGGTC	528	PASS	END=16224891;SVTYPE=INS;SVLEN=92;CIGAR=1M92I	GT:FT:GQ:PL:PR:SR	1/1:PASS:36:581,39,0:0,0:0,13	Insertion	Homozygous	P0_N2_treated_hermaphrodite	16224891	X	0	0	0	0	0	rep.1	45361197			0
144213	X	16884705	MantaBND:510:0:2:0:1:0:1	G	[II:6187741[G	999	PASS	SVTYPE=BND;MATEID=MantaBND:510:0:2:0:1:0:0;CIPOS=0,3;HOMLEN=3;HOMSEQ=GAT;BND_DEPTH=124;MATE_BND_DEPTH=135	GT:FT:GQ:PL:PR:SR	0/1:PASS:496:999,0,493:17,7:42,30	Translocation	Heterozygous	P0_N2_treated_hermaphrodite	6187741	II	3	0	3	0	0	rep.1	45361197	4		3		(CGGGATGGAT)n	(TCCCGATCCA)n
144215	I	2002703	MantaBND:54:3:4:0:0:0:0	C	]III:468056]C	796	PASS	SVTYPE=BND;MATEID=MantaBND:54:3:4:0:0:0:1;BND_DEPTH=50;MATE_BND_DEPTH=97	GT:FT:GQ:PL:PR:SR	0/1:PASS:796:846,0,888:38,6:54,19	Translocation	Heterozygous	P0_N2_treated_hermaphrodite	468056	III	0	0	0	0	0	rep.2	42615202	3		0	x	PAL5A_CE	CEMUDR1
144215	I	2295502	MantaBND:96:0:1:0:0:0:1	A	[V:1772204[A	639	PASS	SVTYPE=BND;MATEID=MantaBND:96:0:1:0:0:0:0;CIPOS=0,27;HOMLEN=27;HOMSEQ=AAGCCGAATAATTATTAGAGCGCGCTT;BND_DEPTH=66;MATE_BND_DEPTH=49	GT:FT:GQ:PL:PR:SR	0/1:PASS:274:689,0,271:12,6:16,15	Translocation	Heterozygous	P0_N2_treated_hermaphrodite	1772204	V	27	0	27	0	0	rep.2	42615202	4		27		CELE14A	PALTTAA1_CE
144215	I	2893807	MantaBND:104:0:1:0:0:0:1	T	T]I:3515362]	64	PASS	SVTYPE=BND;MATEID=MantaBND:104:0:1:0:0:0:0;IMPRECISE;CIPOS=-180,181;BND_DEPTH=39;MATE_BND_DEPTH=48	GT:FT:GQ:PL:PR	0/1:PASS:64:114,0,343:24,11	Translocation	Heterozygous	P0_N2_treated_hermaphrodite	3515362	I	0	-180	181	0	0	rep.2	42615202	2		181			PALTTAA3_CE
144215	I	3515362	MantaBND:104:0:1:0:0:0:0	A	A]I:2893807]	64	PASS	SVTYPE=BND;MATEID=MantaBND:104:0:1:0:0:0:1;IMPRECISE;CIPOS=-163,163;BND_DEPTH=48;MATE_BND_DEPTH=39	GT:FT:GQ:PL:PR	0/1:PASS:64:114,0,343:24,11	Translocation	Heterozygous	P0_N2_treated_hermaphrodite	2893807	I	0	-163	163	0	0	rep.2	42615202	2		163		PALTTAA3_CE
144215	I	4785680	MantaINS:160:0:0:1:0:0	T	TGGGGGTAGCTATCCACGACGGCCGACAATTTCCAAGTTTCGCCACTCACTATAAAATTGCTGATTAAGTATAGTGAGTGGCGAAACTCGGAAATTGTCGGCCGCCGTGGAAACCTACCCCAAACC	502	PASS	END=4785680;SVTYPE=INS;SVLEN=125;CIGAR=1M125I	GT:FT:GQ:PL:PR:SR	1/1:PASS:43:555,46,0:0,5:0,12	Insertion	Homozygous	P0_N2_treated_hermaphrodite	4785680	I	0	0	0	0	0	rep.2	42615202			0
144215	I	6521294	MantaINS:219:0:0:0:0:0	A	AGATCGAAACAATTATTGGAAATGTATTAAATGAAATGAAATCAGAATTGCATTTAGGGGGTAGTAGTCGCATCTTTAGTCAGATTATTCAGATATAGTATGAAGTTTTTAGATAATAAATCAATTCTTTCAGACGTTTCTTGTGGAGTGGGCATCATTTATTTTGGCCAAAACGTTTTCTCACTCACACGAAAGAATAGGAACAAACTGTGCAAATCCAATAGATTCTTGTT	999	PASS	END=6521294;SVTYPE=INS;SVLEN=232;CIGAR=1M232I;CIPOS=0,5;HOMLEN=5;HOMSEQ=GATCG	GT:FT:GQ:PL:PR:SR	1/1:PASS:130:999,133,0:0,2:0,55	Insertion	Homozygous	P0_N2_treated_hermaphrodite	6521294	I	5	0	5	0	0	rep.2	42615202			5
144215	I	8054335	MantaBND:252:0:1:0:0:0:0	A	A[IV:8566417[	987	PASS	SVTYPE=BND;MATEID=MantaBND:252:0:1:0:0:0:1;CIPOS=0,37;HOMLEN=37;HOMSEQ=ACTCGGCATTTGGCTCTAGCTTCTTGCCCAAGTTTAG;BND_DEPTH=60;MATE_BND_DEPTH=75	GT:FT:GQ:PL:PR:SR	0/1:PASS:270:999,0,267:5,3:20,24	Translocation	Heterozygous	P0_N2_treated_hermaphrodite	8566417	IV	37	0	37	0	0	rep.2	42615202	1		37	x
144215	I	8454802	MantaINS:266:0:0:0:3:0	T	<INS>	999	PASS	END=8454802;SVTYPE=INS;LEFT_SVINSSEQ=TAGGTGATTGGTAGGTTAGATATTACATATAGGGGGGGGGGGGGGCATTGACAGAATTCTCTTTTCGATTGGCGTCATTTTTTATGGGTAACTATAGTTGTAGATCCTCAAAATCT;RIGHT_SVINSSEQ=TTACGGGAACGTCGCAAAGTCAAATAGTTGGCAAAGTGGAGAGACGGCAGACATGACGTGGCACCAACCAGCGAAAACACGCAAACGGCGATGATCCGGAAATGGCAGAAAAAAACGAC	GT:FT:GQ:PL:PR:SR	1/1:PASS:104:999,107,0:0,0:0,40	Insertion	Homozygous	P0_N2_treated_hermaphrodite	8454802	I	0	0	0	0	0	rep.2	42615202			0
144215	I	8660529	MantaBND:267:0:0:1:0:0:0	A	A]I:8660598]	238	PASS	SVTYPE=BND;MATEID=MantaBND:267:0:0:1:0:0:1;IMPRECISE;CIPOS=-224,224;BND_DEPTH=79;MATE_BND_DEPTH=50	GT:FT:GQ:PL:PR	0/1:PASS:134:288,0,131:11,15	Translocation	Heterozygous	P0_N2_treated_hermaphrodite	8660598	I	0	-224	224	0	0	rep.2	42615202	2		224	x
144215	I	8660598	MantaBND:267:0:0:1:0:0:1	A	A]I:8660529]	238	PASS	SVTYPE=BND;MATEID=MantaBND:267:0:0:1:0:0:0;IMPRECISE;CIPOS=-186,187;BND_DEPTH=50;MATE_BND_DEPTH=79	GT:FT:GQ:PL:PR	0/1:PASS:134:288,0,131:11,15	Translocation	Heterozygous	P0_N2_treated_hermaphrodite	8660529	I	0	-186	187	0	0	rep.2	42615202	2		187	x
144215	I	11175582	MantaINS:347:0:0:0:4:0	C	<INS>	999	PASS	END=11175582;SVTYPE=INS;CIPOS=0,6;CIEND=0,6;HOMLEN=6;HOMSEQ=CTCGTG;LEFT_SVINSSEQ=CTCGTGGATTACACGAGCACTGCGTAAATCGACACATGACTAATATTGGGCTTTTCCAATTTAAATCGACTATTTTAAGCTAAAAGTTGCTTGATTTTTAAGAAAAAAAAAGAAGAATTTATGTTAAAAACTACAAATGACCGAATATCATGAAAAAAATTTAAAAAAATATTCTAGATTTTATATGATGTTTTGAAAATTGGAAAAATCTCAGTTTTCCCCTAATTCC;RIGHT_SVINSSEQ=ATATTCGGTCATTTGTAGTTTTTAACATAAATTTTACATTTTTTTTCTTAAAAATCACGCAATTTTTAGCCTA…	GT:FT:GQ:PL:PR:SR	1/1:PASS:98:999,101,0:0,1:0,36	Insertion	Homozygous	P0_N2_treated_hermaphrodite	11175582	I	6	0	6	0	6	rep.2	42615202			6
144215	I	11511648	MantaBND:104:3:5:1:0:0:0	G	]IV:17326045]TG	733	PASS	SVTYPE=BND;MATEID=MantaBND:104:3:5:1:0:0:1;SVINSLEN=1;SVINSSEQ=T;BND_DEPTH=66;MATE_BND_DEPTH=129	GT:FT:GQ:PL:PR:SR	0/1:PASS:376:783,0,373:12,8:28,18	Translocation	Heterozygous	P0_N2_treated_hermaphrodite	17326045	IV	0	0	0	0	0	rep.2	42615202	3	T	0	x	CELE46A	PALTTAA3_CE
144215	I	11630133	MantaBND:351:0:3:0:0:0:1	C	C]V:2701131]	38	PASS	SVTYPE=BND;MATEID=MantaBND:351:0:3:0:0:0:0;IMPRECISE;CIPOS=-275,276;BND_DEPTH=89;MATE_BND_DEPTH=64	GT:FT:GQ:PL:PR	0/1:PASS:38:88,0,929:62,16	Translocation	Heterozygous	P0_N2_treated_hermaphrodite	2701131	V	0	-275	276	0	0	rep.2	42615202	2		276	x		HAT1_CE
144215	I	11713576	MantaBND:362:0:1:0:0:0:0	A	A]X:1887948]	115	PASS	SVTYPE=BND;MATEID=MantaBND:362:0:1:0:0:0:1;BND_DEPTH=75;MATE_BND_DEPTH=79	GT:FT:GQ:PL:PR:SR	0/1:PASS:115:165,0,999:33,7:81,15	Translocation	Heterozygous	P0_N2_treated_hermaphrodite	1887948	X	0	0	0	0	0	rep.2	42615202	2		0	x
144215	I	12738722	MantaINS:381:0:0:0:0:0	A	AATCCTTATGATCCTCATCTGGGTAGCCTAGGATAAACATCGGAACGGGAGGATCTGCTTCAAAGATCTTTGGGATCCTCGGCCATACCACTTGAGCTATGAATCTTCAGAAAGATCTGTAGGATCCAGGGGCTACGATCTTCATGGCAAGCTAGGATCCTGAACTAGGTCACTCCCGCTCCTCCAGAATTTTCACTAGGAAAACCAGGTTCCGAAGATCCGTGGAATCTTATGAAGCTGCTCTTCAATCTCTTCAATCAGTATGGGTGATGCTGATGCTGAAGATCTGATAATTGACAGAGG	999	PASS	END=12738722;SVTYPE=INS;SVLEN=302;CIGAR=1M302I;CIPOS=0,19;HOMLEN=19;HOMSEQ=ATCCTTATGATCCTCATCT	GT:FT:GQ:PL:PR:SR	1/1:PASS:110:999,113,0:1,3:0,47	Insertion	Homozygous	P0_N2_treated_hermaphrodite	12738722	I	19	0	19	0	0	rep.2	42615202			19
144215	I	12864614	MantaINS:389:0:0:0:0:0	T	TAAATGCGTACGTGGAGCATTTTATTTGACGCGCAATATCTCTTAGCGAAAACTCCAGTAAGAACTCAACTAACTATTGTTATTTAAGATCTTACTGTAGTTTTCGCTAAGAGATATCGCGCGTCAAATA	999	PASS	END=12864614;SVTYPE=INS;SVLEN=129;CIGAR=1M129I;CIPOS=0,6;HOMLEN=6;HOMSEQ=AAATGC	GT:FT:GQ:PL:PR:SR	1/1:PASS:76:999,79,0:0,2:0,27	Insertion	Homozygous	P0_N2_treated_hermaphrodite	12864614	I	6	0	6	0	0	rep.2	42615202			6
144215	I	14425428	MantaDEL:431:0:0:0:0:0	CAGCAATTTTGCCTAATTTAGACTACAAACTACAGTTATTTGCAATTTGGCACAGTCTGTCTTGATTACTATAATGCAGTAGCAGTAGTCGAAATTTCAAAAAAAATCGCCAAATTCGAATTCAATTTTCTGAGAAAATTCTAATTTTCCTGTTAGATATGTTTTGGGCTCTGCTGATCTGTTGGAAAATGCAAAAAATTCGGTGAAAATCTGTTGAAAACTAGGAATTTAGACTAAATTGACGATTGGTTGAGGCTATCGGACTACAAAC	CTATATTTGGAGCTA	936	PASS	END=14425698;SVTYPE=DEL;SVLEN=-270;CIGAR=1M14I270D	GT:FT:GQ:PL:PR:SR	1/1:PASS:56:989,59,0:0,9:0,22	Deletion	Homozygous	P0_N2_treated_hermaphrodite	14425698	I	0	0	0	0	0	rep.2	42615202			0
144215	II	1450599	MantaBND:489:0:1:0:0:0:0	C	C]II:1455933]	53	PASS	SVTYPE=BND;MATEID=MantaBND:489:0:1:0:0:0:1;IMPRECISE;CIPOS=-303,304;BND_DEPTH=79;MATE_BND_DEPTH=74	GT:FT:GQ:PL:PR	0/1:PASS:53:103,0,231:16,7	Translocation	Heterozygous	P0_N2_treated_hermaphrodite	1455933	II	0	-303	304	0	0	rep.2	42615202	2		304	x	(TAATT)n	(TACGCTA)n
144215	II	1455933	MantaBND:489:0:1:0:0:0:1	A	A]II:1450599]	53	PASS	SVTYPE=BND;MATEID=MantaBND:489:0:1:0:0:0:0;IMPRECISE;CIPOS=-198,199;BND_DEPTH=74;MATE_BND_DEPTH=79	GT:FT:GQ:PL:PR	0/1:PASS:53:103,0,231:16,7	Translocation	Heterozygous	P0_N2_treated_hermaphrodite	1450599	II	0	-198	199	0	0	rep.2	42615202	2		199	x
144215	II	1659321	MantaBND:499:0:2:1:0:0:1	T	]X:8651862]T	666	PASS	SVTYPE=BND;MATEID=MantaBND:499:0:2:1:0:0:0;IMPRECISE;CIPOS=-168,169;EVENT=MantaBND:499:0:2:0:0:0:0;JUNCTION_QUAL=9;BND_DEPTH=45;MATE_BND_DEPTH=56	GT:FT:GQ:PL:PR	0/1:PASS:666:716,0,950:40,12	Translocation	Heterozygous	P0_N2_treated_hermaphrodite	8651862	X	0	-168	169	0	0	rep.2	42615202	3		169	x	LONGPAL3	(TTGTAT)n
144215	II	1659660	MantaBND:499:0:1:0:0:0:0	A	A[IV:4198405[	43	PASS	SVTYPE=BND;MATEID=MantaBND:499:0:1:0:0:0:1;IMPRECISE;CIPOS=-147,147;BND_DEPTH=73;MATE_BND_DEPTH=46	GT:FT:GQ:PL:PR	0/1:PASS:43:93,0,494:33,10	Translocation	Heterozygous	P0_N2_treated_hermaphrodite	4198405	IV	0	-147	147	0	0	rep.2	42615202	1		147	x	CELE6	LONGPAL3
144215	II	1659790	MantaBND:499:0:2:0:0:0:0	A	A[X:8651737[	666	PASS	SVTYPE=BND;MATEID=MantaBND:499:0:2:0:0:0:1;CIPOS=0,9;HOMLEN=9;HOMSEQ=GCATAGGCC;EVENT=MantaBND:499:0:2:0:0:0:0;JUNCTION_QUAL=608;BND_DEPTH=42;MATE_BND_DEPTH=76	GT:FT:GQ:PL:PR:SR	0/1:PASS:666:716,0,950:16,6:25,15	Translocation	Heterozygous	P0_N2_treated_hermaphrodite	8651737	X	9	0	9	0	0	rep.2	42615202	1		9	x
144215	II	2141116	MantaINS:514:0:0:0:2:0	A	<INS>	999	PASS	END=2141116;SVTYPE=INS;CIPOS=0,12;CIEND=0,12;HOMLEN=12;HOMSEQ=TTAACAAGGAAA;LEFT_SVINSSEQ=TTAACAAGGAAAGTAAGTCAATCTAGTCCCGGACTTTAAATCGAGACGTATGTCATTTGAAAATTTATGTTTAGACTAGATCACCACTAAAATTTCAGCGGCGGAACTCAACTCTGAACCCCTGAAATTGCCATCTGAAAGTGCTCTAGTGCATTTTTTCGCTGAATTCTAGGT;RIGHT_SVINSSEQ=CGATTTAAAGTCCGGGACTAGATTGACTTACTTTCCTTGTAAGGTCATTTGAGATGAGAATATAAAAATTACATACGTTATTCAATGTTTTCAG	GT:FT:GQ:PL:PR:SR	1/1:PASS:136:999,139,0:0,1:0,50	Insertion	Homozygous	P0_N2_treated_hermaphrodite	2141116	II	12	0	12	0	12	rep.2	42615202			12
144215	II	2141116	MantaBND:514:0:1:0:0:0:1	A	A[V:686153[	999	PASS	SVTYPE=BND;MATEID=MantaBND:514:0:1:0:0:0:0;CIPOS=0,12;HOMLEN=12;HOMSEQ=TTAACAAGGAAA;BND_DEPTH=77;MATE_BND_DEPTH=110	GT:FT:GQ:PL:PR:SR	0/1:PASS:506:999,0,503:16,10:37,33	Translocation	Heterozygous	P0_N2_treated_hermaphrodite	686153	V	12	0	12	0	0	rep.2	42615202	1		12	x
144215	II	2818716	MantaINS:524:0:0:0:0:0	A	AGCGCTCAAAGATTGGGCGCGAGAGAGCGCGGGGAAGGGGAGACGCAGAGCGCCTCGCGCGCCTGCGTCTCCCCTTCCACCGCACTCTCTC	746	PASS	END=2818716;SVTYPE=INS;SVLEN=90;CIGAR=1M90I;CIPOS=0,4;HOMLEN=4;HOMSEQ=GCGC	GT:FT:GQ:PL:PR:SR	1/1:PASS:49:799,52,0:0,0:0,28	Insertion	Homozygous	P0_N2_treated_hermaphrodite	2818716	II	4	0	4	0	0	rep.2	42615202			4
144215	II	3159629	MantaDEL:537:0:1:0:0:0	G	<DEL>	24	PASS	END=3163350;SVTYPE=DEL;SVLEN=-3721;IMPRECISE;CIPOS=-81,81;CIEND=-74,74	GT:FT:GQ:PL:PR	0/1:PASS:24:74,0,253:17,6	Deletion	Heterozygous	P0_N2_treated_hermaphrodite	3163350	II	0	-81	81	-74	74	rep.2	42615202			81
144215	II	3539570	MantaDUP:TANDEM:552:0:1:0:0:0	C	<DUP:TANDEM>	954	PASS	END=3539908;SVTYPE=DUP;SVLEN=338;CIPOS=0,31;CIEND=0,31;HOMLEN=31;HOMSEQ=CGATTTTTCAATGAATTTTCCAATTTTCTCT	GT:FT:GQ:PL:PR:SR	0/1:PASS:404:999,0,401:23,7:18,22	Tandem Duplication	Heterozygous	P0_N2_treated_hermaphrodite	3539908	II	31	0	31	0	31	rep.2	42615202			31
144215	II	3539921	MantaINS:552:1:1:1:0:0	G	GAATTTTCCAATTTTCTCTTTAAAAAAATACCGGAAAATTCGAAAAAATATCCGATTTTTTCGAAAAAAGTCAGATTTTTCCTTCTGTTTTTCCGACATTTTTTTAAAGAGAAAATCTGAAAATTTTGTGAAAAATAGGATATTTTTCTTTACTTTTTAAGGAAAAATATCAGATTTTCCACTA	999	PASS	END=3539921;SVTYPE=INS;SVLEN=183;CIGAR=1M183I;CIPOS=0,18;HOMLEN=18;HOMSEQ=AATTTTCCAATTTTCTCT	GT:FT:GQ:PL:PR:SR	1/1:PASS:127:999,130,0:0,0:0,53	Insertion	Homozygous	P0_N2_treated_hermaphrodite	3539921	II	18	0	18	0	0	rep.2	42615202			18
144215	II	3833797	MantaINS:572:0:0:1:0:1	ACG	ATGGCTAGTTTAGGGGTGACAGGCAAACGATTTTTTCCGGCAAATCAGCAAACCGGCAATTTGCCGAATTTGCCGGAAAAAACTCAATTGCCGTCCACTCCTGTGATAGTGGATGGTTGT	999	PASS	END=3833799;SVTYPE=INS;SVLEN=119;CIGAR=1M119I2D	GT:FT:GQ:PL:PR:SR	0/1:PASS:417:999,0,414:0,0:30,34	Insertion	Heterozygous	P0_N2_treated_hermaphrodite	3833799	II	0	0	0	0	0	rep.2	42615202			0
144215	II	3834811	MantaDEL:581:0:0:0:0:0	TGCATAAATGGGCATAAATGGGCCAATGAAAAGCATAAATGGGCCAATGAAT	TAAGATATAG	857	PASS	END=3834862;SVTYPE=DEL;SVLEN=-51;CIGAR=1M9I51D	GT:FT:GQ:PL:PR:SR	0/1:PASS:600:907,0,597:13,0:43,24	Deletion	Heterozygous	P0_N2_treated_hermaphrodite	3834862	II	0	0	0	0	0	rep.2	42615202			0
144215	II	4309134	MantaBND:320:13:26:0:0:0:1	A	A[IV:13463713[	999	PASS	SVTYPE=BND;MATEID=MantaBND:320:13:26:0:0:0:0;CIPOS=0,19;HOMLEN=19;HOMSEQ=TATTTATTTATTTAATTAA;BND_DEPTH=128;MATE_BND_DEPTH=89	GT:FT:GQ:PL:PR:SR	0/1:PASS:434:999,0,431:23,3:51,56	Translocation	Heterozygous	P0_N2_treated_hermaphrodite	13463713	IV	19	0	19	0	0	rep.2	42615202	1		19			HelitronY1_CE
144215	II	6630113	MantaDUP:TANDEM:644:0:1:0:0:0	C	<DUP:TANDEM>	999	PASS	END=6630883;SVTYPE=DUP;SVLEN=770	GT:FT:GQ:PL:PR:SR	0/1:PASS:999:999,0,999:37,32:68,36	Tandem Duplication	Heterozygous	P0_N2_treated_hermaphrodite	6630883	II	0	0	0	0	0	rep.2	42615202			0
144215	II	6669184	MantaINS:652:0:0:0:4:0	T	<INS>	999	PASS	END=6669184;SVTYPE=INS;CIPOS=0,6;CIEND=0,6;HOMLEN=6;HOMSEQ=CATTTC;LEFT_SVINSSEQ=CATTTCCGATGCATTTAATATTATTCCGAATAATACCAGAGTTGGACCACCAGGATTTGTTATCCTGATTGCAAATTCGTGAGTGTTCGCCATGATCACTGTTTCAGAAATTCAATTTTCAGCGCTGATTCGGTTCCAACTTCTGTGAATTCCGCTGTGAATTTGAAAGCTCAAGGGTTTGAAATTGTCACAGTTGGATTTAAATCAGCTGGAGATTTTACCTCGTTGTCATCACAGCCTGGTTT;RIGHT_SVINSSEQ=GCTCTCACTTGTCCCATTCCCTACTGGAAACACACTTGAGCCACTAATGACATACGGA…	GT:FT:GQ:PL:PR:SR	1/1:PASS:180:999,183,0:0,1:0,68	Insertion	Homozygous	P0_N2_treated_hermaphrodite	6669184	II	6	0	6	0	6	rep.2	42615202			6
144215	II	7801507	MantaDEL:684:0:0:0:0:0	ATAAGACAATGCCAAAGTGATAACTTTCCTGAAGGCACATTTACTTCGCCTAATTTTTGATTTTTAAAACAAATAAATATTTACATTTTCTAATATTGATC	A	442	PASS	END=7801607;SVTYPE=DEL;SVLEN=-100;CIGAR=1M100D;CIPOS=0,100;HOMLEN=100;HOMSEQ=TAAGACAATGCCAAAGTGATAACTTTCCTGAAGGCACATTTACTTCGCCTAATTTTTGATTTTTAAAACAAATAAATATTTACATTTTCTAATATTGATC	GT:FT:GQ:PL:PR:SR	1/1:PASS:27:495,30,0:0,0:0,10	Deletion	Homozygous	P0_N2_treated_hermaphrodite	7801607	II	100	0	100	0	0	rep.2	42615202			100
144215	II	11027622	MantaDUP:TANDEM:766:0:1:0:0:0	C	<DUP:TANDEM>	150	PASS	END=11027691;SVTYPE=DUP;SVLEN=69;SVINSLEN=3;SVINSSEQ=AGT	GT:FT:GQ:PL:PR:SR	0/1:PASS:150:200,0,512:10,4:39,8	Tandem Duplication	Heterozygous	P0_N2_treated_hermaphrodite	11027691	II	0	0	0	0	0	rep.2	42615202			0
144215	II	11027640	MantaINS:766:0:0:0:0:0	C	CCGTGAAGATCGCCGTGACCGAAGCAAGGATCGGGAGGATCGTCGTGATCGCAGTAAGGATCGAGACGATCGT	999	PASS	END=11027640;SVTYPE=INS;SVLEN=72;CIGAR=1M72I;CIPOS=0,32;HOMLEN=32;HOMSEQ=CGTGAAGATCGCCGTGACCGAAGCAAGGATCG	GT:FT:GQ:PL:PR:SR	1/1:PASS:142:999,145,0:0,0:0,55	Insertion	Homozygous	P0_N2_treated_hermaphrodite	11027640	II	32	0	32	0	0	rep.2	42615202			32
144215	II	11211479	MantaDUP:TANDEM:774:0:1:0:0:0	A	<DUP:TANDEM>	37	PASS	END=11212078;SVTYPE=DUP;SVLEN=599;IMPRECISE;CIPOS=-194,194;CIEND=-192,193	GT:FT:GQ:PL:PR	0/1:PASS:37:87,0,361:25,10	Tandem Duplication	Heterozygous	P0_N2_treated_hermaphrodite	11212078	II	0	-194	194	-192	193	rep.2	42615202			194
144215	II	11704655	MantaINS:784:0:0:0:0:0	G	GTTTTTTCAAATGTGCCTCCGTGGAGAAAACCATCTGAAATGTTAAAAAAATTATGTTTTT	999	PASS	END=11704655;SVTYPE=INS;SVLEN=60;CIGAR=1M60I;CIPOS=0,9;HOMLEN=9;HOMSEQ=TTTTTTCAA	GT:FT:GQ:PL:PR:SR	1/1:PASS:103:999,106,0:0,0:0,49	Insertion	Homozygous	P0_N2_treated_hermaphrodite	11704655	II	9	0	9	0	0	rep.2	42615202			9
144215	II	13583084	MantaDUP:TANDEM:841:0:1:0:0:0	C	<DUP:TANDEM>	999	PASS	END=13583647;SVTYPE=DUP;SVLEN=563;SVINSLEN=1;SVINSSEQ=T	GT:FT:GQ:PL:PR:SR	0/1:PASS:656:999,0,653:32,12:43,28	Tandem Duplication	Heterozygous	P0_N2_treated_hermaphrodite	13583647	II	0	0	0	0	0	rep.2	42615202			0
144215	II	13870622	MantaDUP:TANDEM:850:0:1:0:0:0	C	<DUP:TANDEM>	944	PASS	END=13871114;SVTYPE=DUP;SVLEN=492;CIPOS=0,30;CIEND=0,30;HOMLEN=30;HOMSEQ=GATTTTTAGGCAGTTTTTTTCACAATTTTC	GT:FT:GQ:PL:PR:SR	0/1:PASS:583:994,0,580:20,15:41,22	Tandem Duplication	Heterozygous	P0_N2_treated_hermaphrodite	13871114	II	30	0	30	0	30	rep.2	42615202			30
144215	II	15049162	MantaBND:866:0:2:0:0:0:1	T	[II:15049584[T	752	PASS	SVTYPE=BND;MATEID=MantaBND:866:0:2:0:0:0:0;CIPOS=0,14;HOMLEN=14;HOMSEQ=TAGACAACTTTTTA;BND_DEPTH=57;MATE_BND_DEPTH=101	GT:FT:GQ:PL:PR:SR	0/1:PASS:752:802,0,910:31,4:56,21	Translocation	Heterozygous	P0_N2_treated_hermaphrodite	15049584	II	14	0	14	0	0	rep.2	42615202	4		14
144215	II	15049557	MantaBND:866:0:1:0:0:0:0	T	T]II:15050142]	999	PASS	SVTYPE=BND;MATEID=MantaBND:866:0:1:0:0:0:1;CIPOS=0,2;HOMLEN=2;HOMSEQ=TT;BND_DEPTH=101;MATE_BND_DEPTH=54	GT:FT:GQ:PL:PR:SR	0/1:PASS:553:999,0,550:14,8:41,31	Translocation	Heterozygous	P0_N2_treated_hermaphrodite	15050142	II	2	0	2	0	0	rep.2	42615202	2		2	x		LONGPAL3
144215	II	15049570	MantaBND:866:0:2:0:0:0:0	A	[II:15049176[A	752	PASS	SVTYPE=BND;MATEID=MantaBND:866:0:2:0:0:0:1;CIPOS=0,14;HOMLEN=14;HOMSEQ=AAAAGTTGTCTAAT;BND_DEPTH=101;MATE_BND_DEPTH=57	GT:FT:GQ:PL:PR:SR	0/1:PASS:752:802,0,910:31,4:56,21	Translocation	Heterozygous	P0_N2_treated_hermaphrodite	15049176	II	14	0	14	0	0	rep.2	42615202	4		14
144215	II	15050140	MantaBND:866:0:1:0:0:0:1	A	A]II:15049559]	999	PASS	SVTYPE=BND;MATEID=MantaBND:866:0:1:0:0:0:0;CIPOS=0,2;HOMLEN=2;HOMSEQ=AA;BND_DEPTH=54;MATE_BND_DEPTH=101	GT:FT:GQ:PL:PR:SR	0/1:PASS:553:999,0,550:14,8:41,31	Translocation	Heterozygous	P0_N2_treated_hermaphrodite	15049559	II	2	0	2	0	0	rep.2	42615202	2		2	x	LONGPAL3
144215	III	55714	MantaBND:394:2:4:0:0:0:1	A	]V:12864683]A	999	PASS	SVTYPE=BND;MATEID=MantaBND:394:2:4:0:0:0:0;BND_DEPTH=75;MATE_BND_DEPTH=39	GT:FT:GQ:PL:PR:SR	0/1:PASS:375:999,0,372:7,4:29,25	Translocation	Heterozygous	P0_N2_treated_hermaphrodite	12864683	V	0	0	0	0	0	rep.2	42615202	3		0
144215	III	467776	MantaBND:54:4:5:0:0:0:1	T	[V:18995437[T	657	PASS	SVTYPE=BND;MATEID=MantaBND:54:4:5:0:0:0:0;CIPOS=0,2;HOMLEN=2;HOMSEQ=GT;BND_DEPTH=99;MATE_BND_DEPTH=47	GT:FT:GQ:PL:PR:SR	0/1:PASS:657:707,0,986:37,3:60,19	Translocation	Heterozygous	P0_N2_treated_hermaphrodite	18995437	V	2	0	2	0	0	rep.2	42615202	4		2		PAL8D_CE	PAL5A_CE
144215	III	468056	MantaBND:54:3:4:0:0:0:1	G	G[I:2002703[	796	PASS	SVTYPE=BND;MATEID=MantaBND:54:3:4:0:0:0:0;BND_DEPTH=97;MATE_BND_DEPTH=50	GT:FT:GQ:PL:PR:SR	0/1:PASS:796:846,0,888:38,6:54,19	Translocation	Heterozygous	P0_N2_treated_hermaphrodite	2002703	I	0	0	0	0	0	rep.2	42615202	1		0	x	CEMUDR1	PAL5A_CE
144215	III	498451	MantaDUP:TANDEM:887:0:1:0:0:0	A	<DUP:TANDEM>	999	PASS	END=498982;SVTYPE=DUP;SVLEN=531;CIPOS=0,13;CIEND=0,13;HOMLEN=13;HOMSEQ=TATTTAGCATACC	GT:FT:GQ:PL:PR:SR	0/1:PASS:999:999,0,999:27,3:75,28	Tandem Duplication	Heterozygous	P0_N2_treated_hermaphrodite	498982	III	13	0	13	0	13	rep.2	42615202			13
144215	III	2261463	MantaINS:942:0:0:0:0:0	T	TAAAAATGGGGAATTAGAGTGCGAAGTTAAAGGTGGAGTAGCGTCAGTGTGGA	999	PASS	END=2261463;SVTYPE=INS;SVLEN=52;CIGAR=1M52I;CIPOS=0,2;HOMLEN=2;HOMSEQ=AA	GT:FT:GQ:PL:PR:SR	1/1:PASS:130:999,133,0:0,0:0,49	Insertion	Homozygous	P0_N2_treated_hermaphrodite	2261463	III	2	0	2	0	0	rep.2	42615202			2
144215	III	2514165	MantaINS:57:28:28:0:3:0	A	<INS>	999	PASS	END=2514165;SVTYPE=INS;CIPOS=0,10;CIEND=0,10;HOMLEN=10;HOMSEQ=ACTTTTCCTC;LEFT_SVINSSEQ=ACTTTTCCTCACGAGGGACGAGGAAAAGTGGTTTCTAGGCCATGGTCGAGGGGCCGACAAGTTTCATCGGCCATTTATCTTGCTTTGTTTTCCGCCTGTTTTCTTTCGTTTTTCATCGATTTTTTTTCGTTTTTTCTTAATAAAACTGATAAATAAATATTTTTTGCAGATGCTAAAACAA;RIGHT_SVINSSEQ=GCATATGTATCATGTTTCAGAAAAAGTTTAGGTTTTGTATTCCCGTAATCCATCATATTACATTGACCACTTTCACCGCTGCTTGCCCACTGAATACATAATTTTTTTACTTGGA…	GT:FT:GQ:PL:PR:SR	1/1:PASS:95:999,98,0:0,14:0,21	Insertion	Homozygous	P0_N2_treated_hermaphrodite	2514165	III	10	0	10	0	10	rep.2	42615202			10
144215	III	3681028	MantaINS:977:0:0:0:0:0	T	TCTACATAGGCGCACAGGTAGGCATATGTAGTCTTCGCCCTTGTAGGCACACAGGTAGGCCTGTGAGTCCCCCCCCCCTGTGTGCCTACAAGGGCGAAGA	999	PASS	END=3681028;SVTYPE=INS;SVLEN=99;CIGAR=1M99I;CIPOS=0,7;HOMLEN=7;HOMSEQ=CTACATA	GT:FT:GQ:PL:PR:SR	1/1:PASS:104:999,107,0:0,0:0,42	Insertion	Homozygous	P0_N2_treated_hermaphrodite	3681028	III	7	0	7	0	0	rep.2	42615202			7
144215	III	4026021	MantaINS:986:0:0:0:1:0	C	CCAAAATTTTTATTTTTGTTTTTTTGTGCCTGTATATACCTGTTGAAATTGGAATTCAAGACAAAAACCCGTGTAGCGCGGCTGGGATAGAATATCTCGGTCCAGAAATTTACCCCTCATATTATAAAAAATTAGCAATTTTTTACCATATCAATTCCCCCAAAAATT	999	PASS	END=4026021;SVTYPE=INS;SVLEN=167;CIGAR=1M167I;CIPOS=0,43;HOMLEN=43;HOMSEQ=CAAAATTTTTATTTTTGTTTTTTTGTGCCTGTATATACCTGTT	GT:FT:GQ:PL:PR:SR	1/1:PASS:124:999,127,0:0,3:0,50	Insertion	Homozygous	P0_N2_treated_hermaphrodite	4026021	III	43	0	43	0	0	rep.2	42615202			43
144215	III	4670588	MantaBND:981:4:6:0:1:0:0	T	]V:20705450]T	875	PASS	SVTYPE=BND;MATEID=MantaBND:981:4:6:0:1:0:1;BND_DEPTH=44;MATE_BND_DEPTH=119	GT:FT:GQ:PL:PR:SR	0/1:PASS:251:925,0,248:1,7:31,24	Translocation	Heterozygous	P0_N2_treated_hermaphrodite	20705450	V	0	0	0	0	0	rep.2	42615202	3		0	x
144215	III	9101351	MantaBND:1102:0:0:1:0:0:0	A	A]III:9101497]	118	PASS	SVTYPE=BND;MATEID=MantaBND:1102:0:0:1:0:0:1;IMPRECISE;CIPOS=-269,270;BND_DEPTH=59;MATE_BND_DEPTH=55	GT:FT:GQ:PL:PR	0/1:PASS:118:168,0,296:21,12	Translocation	Heterozygous	P0_N2_treated_hermaphrodite	9101497	III	0	-269	270	0	0	rep.2	42615202	2		270	x
144215	III	9101497	MantaBND:1102:0:0:1:0:0:1	A	A]III:9101351]	118	PASS	SVTYPE=BND;MATEID=MantaBND:1102:0:0:1:0:0:0;IMPRECISE;CIPOS=-208,209;BND_DEPTH=55;MATE_BND_DEPTH=59	GT:FT:GQ:PL:PR	0/1:PASS:118:168,0,296:21,12	Translocation	Heterozygous	P0_N2_treated_hermaphrodite	9101351	III	0	-208	209	0	0	rep.2	42615202	2		209	x
144215	III	10557581	MantaINS:1137:0:0:0:0:0	A	ACCGCAAGTAGATTCTTTCCGCCGGTTCGAAATTTTCCGCAAGTAGATTTTTCCGCCGGTAGATTTTTCCGGTGGTAGATTCTTTCCGCCGGTTCGAGTTTTT	999	PASS	END=10557581;SVTYPE=INS;SVLEN=102;CIGAR=1M102I;CIPOS=0,36;HOMLEN=36;HOMSEQ=CCGCAAGTAGATTCTTTCCGCCGGTTCGAAATTTTC	GT:FT:GQ:PL:PR:SR	1/1:PASS:119:999,122,0:0,2:0,50	Insertion	Homozygous	P0_N2_treated_hermaphrodite	10557581	III	36	0	36	0	0	rep.2	42615202			36
144215	III	11114057	MantaBND:1135:0:1:0:0:0:0	C	[V:17040308[C	30	PASS	SVTYPE=BND;MATEID=MantaBND:1135:0:1:0:0:0:1;IMPRECISE;CIPOS=-125,126;BND_DEPTH=50;MATE_BND_DEPTH=36	GT:FT:GQ:PL:PR	0/1:PASS:30:80,0,549:37,11	Translocation	Heterozygous	P0_N2_treated_hermaphrodite	17040308	V	0	-125	126	0	0	rep.2	42615202	4		126	x		LINE2F_CE
144215	III	11114137	MantaBND:1135:0:2:0:0:0:0	C	]V:306817]C	187	PASS	SVTYPE=BND;MATEID=MantaBND:1135:0:2:0:0:0:1;CIPOS=0,48;HOMLEN=48;HOMSEQ=CCCCTGTTTTCAAATGGAAGAGGTGGCCGTGAAAAAAGCGAACCTCGA;BND_DEPTH=39;MATE_BND_DEPTH=21	GT:FT:GQ:PL:PR:SR	0/1:PASS:163:237,0,160:9,4:9,4	Translocation	Heterozygous	P0_N2_treated_hermaphrodite	306817	V	48	0	48	0	0	rep.2	42615202	3		48			PALTTAA3_CE
144215	III	11114378	MantaBND:1135:1:3:0:0:0:0	T	T]V:17040204]	525	PASS	SVTYPE=BND;MATEID=MantaBND:1135:1:3:0:0:0:1;CIPOS=0,59;HOMLEN=59;HOMSEQ=TCGCTTTTTTCACGGCCACCTCTTCCATTTGAAAACAGGGGGGAAATTAGAAACCCGTG;BND_DEPTH=57;MATE_BND_DEPTH=29	GT:FT:GQ:PL:PR:SR	0/1:PASS:150:575,0,147:11,10:6,12	Translocation	Heterozygous	P0_N2_treated_hermaphrodite	17040204	V	59	0	59	0	0	rep.2	42615202	2		59	x		LINE2F_CE
144215	III	11932011	MantaDUP:TANDEM:1179:0:1:0:0:0	A	<DUP:TANDEM>	822	PASS	END=11932246;SVTYPE=DUP;SVLEN=235;SVINSLEN=8;SVINSSEQ=TATAGATG	GT:FT:GQ:PL:PR:SR	0/1:PASS:634:872,0,631:27,3:42,32	Tandem Duplication	Heterozygous	P0_N2_treated_hermaphrodite	11932246	III	0	0	0	0	0	rep.2	42615202			0
144215	III	12132033	MantaBND:1182:1:3:0:0:0:1	G	G[V:18566342[	56	PASS	SVTYPE=BND;MATEID=MantaBND:1182:1:3:0:0:0:0;IMPRECISE;CIPOS=-200,200;BND_DEPTH=63;MATE_BND_DEPTH=54	GT:FT:GQ:PL:PR	0/1:PASS:56:106,0,633:43,13	Translocation	Heterozygous	P0_N2_treated_hermaphrodite	18566342	V	0	-200	200	0	0	rep.2	42615202	1		200	x	(CTTAG)n	(GGCTTA)n
144215	III	12376545	MantaBND:1192:0:1:1:0:0:1	T	[III:12627387[T	548	PASS	SVTYPE=BND;MATEID=MantaBND:1192:0:1:1:0:0:0;CIPOS=0,20;HOMLEN=20;HOMSEQ=AAAATTTCAAACGAAAATTC;BND_DEPTH=44;MATE_BND_DEPTH=67	GT:FT:GQ:PL:PR:SR	0/1:PASS:395:598,0,392:23,6:23,15	Translocation	Heterozygous	P0_N2_treated_hermaphrodite	12627387	III	20	0	20	0	0	rep.2	42615202	4		20	x
144215	III	12627367	MantaBND:1192:0:1:1:0:0:0	A	[III:12376565[A	548	PASS	SVTYPE=BND;MATEID=MantaBND:1192:0:1:1:0:0:1;CIPOS=0,20;HOMLEN=20;HOMSEQ=ATTTTCGTTTGAAATTTTAA;BND_DEPTH=67;MATE_BND_DEPTH=44	GT:FT:GQ:PL:PR:SR	0/1:PASS:395:598,0,392:23,6:23,15	Translocation	Heterozygous	P0_N2_treated_hermaphrodite	12376565	III	20	0	20	0	0	rep.2	42615202	4		20	x
144215	IV	1236084	MantaINS:1255:0:0:0:3:0	T	<INS>	999	PASS	END=1236084;SVTYPE=INS;CIPOS=0,10;CIEND=0,10;HOMLEN=10;HOMSEQ=TTGCGAAAAA;LEFT_SVINSSEQ=TTGCGAAAAAAATTGCCAATTTTTCGCAATAAACGGTAAAAAATAAATTTTATTTCGAAAAACCGCTTCAAATAAATCTTAAAATTCTTTTAAAAAATCAATAAATTATCGATTTTTGCAGAAATGTGTACAATTATACAGTTCTTTACAGTTCTTTGTTCTCCGTATTCGCGACAATTCACAAAAATAACTATTTTGTGCGAAAAATCATAAAAATGGCGAAATTTGAGATTTTATTTCAAAAATCGATTTAAAGAAACTTTCAAGGAAT;RIGHT_SVINSSEQ=GAACTGTAAAGAACTGTATAATTGT…	GT:FT:GQ:PL:PR:SR	1/1:PASS:149:999,152,0:0,2:0,64	Insertion	Homozygous	P0_N2_treated_hermaphrodite	1236084	IV	10	0	10	0	10	rep.2	42615202			10
144215	IV	1312605	MantaBND:1259:0:1:0:0:0:1	A	]X:256025]A	381	PASS	SVTYPE=BND;MATEID=MantaBND:1259:0:1:0:0:0:0;CIPOS=0,46;HOMLEN=46;HOMSEQ=AAAATTGAATAAAACAGTGAAAAAATCGTGATTTTGACAGAGATCA;BND_DEPTH=53;MATE_BND_DEPTH=29	GT:FT:GQ:PL:PR:SR	0/1:PASS:281:431,0,278:6,4:20,9	Translocation	Heterozygous	P0_N2_treated_hermaphrodite	256025	X	46	0	46	0	0	rep.2	42615202	3		46
144215	IV	4198405	MantaBND:499:0:1:0:0:0:1	G	]II:1659660]G	43	PASS	SVTYPE=BND;MATEID=MantaBND:499:0:1:0:0:0:0;IMPRECISE;CIPOS=-124,124;BND_DEPTH=46;MATE_BND_DEPTH=73	GT:FT:GQ:PL:PR	0/1:PASS:43:93,0,494:33,10	Translocation	Heterozygous	P0_N2_treated_hermaphrodite	1659660	II	0	-124	124	0	0	rep.2	42615202	3		124	x	LONGPAL3
144215	IV	4816396	MantaBND:874:2:3:2:1:0:0	A	ATCGACT[V:9724732[	889	PASS	SVTYPE=BND;MATEID=MantaBND:874:2:3:2:1:0:1;SVINSLEN=6;SVINSSEQ=TCGACT;BND_DEPTH=104;MATE_BND_DEPTH=79	GT:FT:GQ:PL:PR:SR	0/1:PASS:568:939,0,565:21,17:32,20	Translocation	Heterozygous	P0_N2_treated_hermaphrodite	9724732	V	0	0	0	0	0	rep.2	42615202	1	TCGACT	0	x	IR3_CE	CELE14B
144215	IV	5950124	MantaINS:160:3:3:0:2:0	T	<INS>	504	PASS	END=5950124;SVTYPE=INS;CIPOS=0,9;CIEND=0,9;HOMLEN=9;HOMSEQ=ACCGGACGC;LEFT_SVINSSEQ=ACCGGACGCACTGCGTCCGGTTTTGGGGTAGGTTTCCACGGCGGCCGACAATTTCCGAGTTTCGCCACTCACTATAGTTA;RIGHT_SVINSSEQ=GAGTTTCGCCACTCACTATAGTTAATCAGCAATTTTATAGTGAGTGGCGAAACTCGGAAATTGTCGGCCGTCGTGGATAGCTACCTCCA	GT:FT:GQ:PL:PR:SR	1/1:PASS:38:557,41,0:0,4:0,10	Insertion	Homozygous	P0_N2_treated_hermaphrodite	5950124	IV	9	0	9	0	9	rep.2	42615202			9
144215	IV	6005802	MantaBND:1355:0:1:0:0:0:1	G	[V:10866422[G	361	PASS	SVTYPE=BND;MATEID=MantaBND:1355:0:1:0:0:0:0;IMPRECISE;CIPOS=-274,274;BND_DEPTH=112;MATE_BND_DEPTH=106	GT:FT:GQ:PL:PR	0/1:PASS:361:411,0,978:68,31	Translocation	Heterozygous	P0_N2_treated_hermaphrodite	10866422	V	0	-274	274	0	0	rep.2	42615202	4		274
144215	IV	6320432	MantaBND:1361:0:1:0:0:0:0	T	]V:4914049]TGT	999	PASS	SVTYPE=BND;MATEID=MantaBND:1361:0:1:0:0:0:1;SVINSLEN=2;SVINSSEQ=TG;BND_DEPTH=59;MATE_BND_DEPTH=59	GT:FT:GQ:PL:PR:SR	0/1:PASS:140:999,0,137:6,18:13,28	Translocation	Heterozygous	P0_N2_treated_hermaphrodite	4914049	V	0	0	0	0	0	rep.2	42615202	3	TG	0	x	PALTA3_CE
144215	IV	7485251	MantaINS:1407:0:0:0:3:0	A	<INS>	999	PASS	END=7485251;SVTYPE=INS;CIPOS=0,10;CIEND=0,10;HOMLEN=10;HOMSEQ=GGATCCGAAA;LEFT_SVINSSEQ=GGATCCGAAAAGTATCGAACAAGTGATGACACGTCTACAAATTAGCAAACAATGGAATACACTTCGTGCTCTACTCAACTATGTTCGTTCGAATCAAATGGATTCCATGATCCGCTCGTTCCCGCTTATTTGGTTCCGTGTTTATGAAAATGCCTTGATTGAATTGAATGGTGGATCCATGGCGAATCCAGATTGGAATTACGAACAATGCGTTATGCTTCGAAAATGGACTTTGTGGGCAATGAGCAGCAATGTCGAAGGAGGACGTCAACCAAATATTGCT;RIGHT_SVINSSEQ=TTGCTCGATTCCT…	GT:FT:GQ:PL:PR:SR	1/1:PASS:193:999,196,0:0,3:0,78	Insertion	Homozygous	P0_N2_treated_hermaphrodite	7485251	IV	10	0	10	0	10	rep.2	42615202			10
144215	IV	8566417	MantaBND:252:0:1:0:0:0:1	A	]I:8054335]A	987	PASS	SVTYPE=BND;MATEID=MantaBND:252:0:1:0:0:0:0;CIPOS=0,37;HOMLEN=37;HOMSEQ=CTCGGCATTTGGCTCTAGCTTCTTGCCCAAGTTTAGC;BND_DEPTH=75;MATE_BND_DEPTH=60	GT:FT:GQ:PL:PR:SR	0/1:PASS:270:999,0,267:5,3:20,24	Translocation	Heterozygous	P0_N2_treated_hermaphrodite	8054335	I	37	0	37	0	0	rep.2	42615202	3		37	x
144215	IV	9852302	MantaDUP:TANDEM:1470:0:1:0:0:0	T	<DUP:TANDEM>	248	PASS	END=9852492;SVTYPE=DUP;SVLEN=190;CIPOS=0,4;CIEND=0,4;HOMLEN=4;HOMSEQ=AAAT	GT:FT:GQ:PL:PR:SR	0/1:PASS:248:298,0,999:35,2:91,21	Tandem Duplication	Heterozygous	P0_N2_treated_hermaphrodite	9852492	IV	4	0	4	0	4	rep.2	42615202			4
144215	IV	10350537	MantaBND:1481:0:0:1:0:0:0	A	[IV:10350682[A	840	PASS	SVTYPE=BND;MATEID=MantaBND:1481:0:0:1:0:0:1;BND_DEPTH=105;MATE_BND_DEPTH=98	GT:FT:GQ:PL:PR:SR	0/1:PASS:840:890,0,999:34,9:86,23	Translocation	Heterozygous	P0_N2_treated_hermaphrodite	10350682	IV	0	0	0	0	0	rep.2	42615202	4		0	x
144215	IV	10350682	MantaBND:1481:0:0:1:0:0:1	A	[IV:10350537[A	840	PASS	SVTYPE=BND;MATEID=MantaBND:1481:0:0:1:0:0:0;BND_DEPTH=98;MATE_BND_DEPTH=105	GT:FT:GQ:PL:PR:SR	0/1:PASS:840:890,0,999:34,9:86,23	Translocation	Heterozygous	P0_N2_treated_hermaphrodite	10350537	IV	0	0	0	0	0	rep.2	42615202	4		0	x
144215	IV	12688217	MantaINS:1551:0:0:0:0:0	A	AAAAAATACGATCGCACAAAAATAAACAACGACGCAACGACACTCCGCTGTTTTCAATCCCCGCCCACGATTTCATTTGCACTGCGGCCGCCACATTTCAGTGCAAATGAAATCGTGGCGAGGCTTAAAAATAGCGGAGTGTCGTTGCGTCGTTGTTTATTTTTGTGCGATCGTATTTTTTCTATAATAATT	999	PASS	END=12688217;SVTYPE=INS;SVLEN=191;CIGAR=1M191I;CIPOS=0,7;HOMLEN=7;HOMSEQ=AAAAATA	GT:FT:GQ:PL:PR:SR	1/1:PASS:68:999,71,0:0,8:0,22	Insertion	Homozygous	P0_N2_treated_hermaphrodite	12688217	IV	7	0	7	0	0	rep.2	42615202			7
144215	IV	13463713	MantaBND:320:13:26:0:0:0:0	T	]II:4309134]T	999	PASS	SVTYPE=BND;MATEID=MantaBND:320:13:26:0:0:0:1;CIPOS=0,19;HOMLEN=19;HOMSEQ=ATTTATTTATTTAATTAAC;BND_DEPTH=89;MATE_BND_DEPTH=128	GT:FT:GQ:PL:PR:SR	0/1:PASS:434:999,0,431:23,3:51,56	Translocation	Heterozygous	P0_N2_treated_hermaphrodite	4309134	II	19	0	19	0	0	rep.2	42615202	3		19		HelitronY1_CE
144215	IV	16571333	MantaBND:981:1:2:0:0:0:0	C	]V:17490437]C	504	PASS	SVTYPE=BND;MATEID=MantaBND:981:1:2:0:0:0:1;CIPOS=0,38;HOMLEN=38;HOMSEQ=TAGGGCTGTGCAACCGGACGTCCGGTTTTTTCGGACGT;EVENT=MantaBND:981:1:2:0:0:0:0;JUNCTION_QUAL=434;BND_DEPTH=70;MATE_BND_DEPTH=43	GT:FT:GQ:PL:PR:SR	0/1:PASS:211:554,0,208:8,7:9,14	Translocation	Heterozygous	P0_N2_treated_hermaphrodite	17490437	V	38	0	38	0	0	rep.2	42615202	3		38	x
144215	IV	16571487	MantaBND:981:1:2:1:0:0:0	T	T[V:17490400[	504	PASS	SVTYPE=BND;MATEID=MantaBND:981:1:2:1:0:0:1;IMPRECISE;CIPOS=-180,180;EVENT=MantaBND:981:1:2:0:0:0:0;JUNCTION_QUAL=20;BND_DEPTH=25;MATE_BND_DEPTH=51	GT:FT:GQ:PL:PR	0/1:PASS:211:554,0,208:6,5	Translocation	Heterozygous	P0_N2_treated_hermaphrodite	17490400	V	0	-180	180	0	0	rep.2	42615202	1		180	x	(CCGGACG)n	(A)n
144215	IV	16780739	MantaDEL:1663:0:1:0:0:0	C	<DEL>	90	PASS	END=16784560;SVTYPE=DEL;SVLEN=-3821;IMPRECISE;CIPOS=-135,135;CIEND=-167,167	GT:FT:GQ:PL:PR	0/1:PASS:90:140,0,619:42,13	Deletion	Heterozygous	P0_N2_treated_hermaphrodite	16784560	IV	0	-135	135	-167	167	rep.2	42615202			167
144215	IV	17326045	MantaBND:104:3:5:1:0:0:1	C	CT[I:11511648[	733	PASS	SVTYPE=BND;MATEID=MantaBND:104:3:5:1:0:0:0;SVINSLEN=1;SVINSSEQ=T;BND_DEPTH=129;MATE_BND_DEPTH=66	GT:FT:GQ:PL:PR:SR	0/1:PASS:376:783,0,373:12,8:28,18	Translocation	Heterozygous	P0_N2_treated_hermaphrodite	11511648	I	0	0	0	0	0	rep.2	42615202	1	T	0	x	PALTTAA3_CE	CELE46A
144215	IV	17492374	MantaINS:1667:0:0:0:0:0	T	TGAGTAAAATAAACTGTAAAGCCAGAGAGTAAAAAATACGGTGAAGCCAGAGAGTAAAATAAACTGTGAAGCCAGAGAGTAAAATATACGGTGAAGCCAGA	999	PASS	END=17492374;SVTYPE=INS;SVLEN=100;CIGAR=1M100I;CIPOS=0,16;HOMLEN=16;HOMSEQ=GAGTAAAATAAACTGT	GT:FT:GQ:PL:PR:SR	1/1:PASS:116:999,119,0:0,0:0,47	Insertion	Homozygous	P0_N2_treated_hermaphrodite	17492374	IV	16	0	16	0	0	rep.2	42615202			16
144215	V	226036	MantaINS:805:4:4:0:0:0	T	TGGAGCGCGGACGGGGCGCGACTAGACACGGGTTCGCGCTCCAGTCACCCTTTTTTTCGCGCTCCTTACGCGCCACGTCCGCGCTCCAATCGCGTTTGCTCCGCGCGCATTCCGAATTTGAAAAATTCTTACGAAATTTTATGGGACGCGATCAGAGCGCCAACGTGGCGCGGAAGGAGCGCGAAAAAACGTGTGACTGGAGCGCCAACCCGTAATCTAGTCGCGCCCCGTCCGCGCTCCTGGA	999	PASS	END=226036;SVTYPE=INS;SVLEN=243;CIGAR=1M243I;CIPOS=0,6;HOMLEN=6;HOMSEQ=GGAGCG	GT:FT:GQ:PL:PR:SR	1/1:PASS:128:999,132,0:0,17:0,31	Insertion	Homozygous	P0_N2_treated_hermaphrodite	226036	V	6	0	6	0	0	rep.2	42615202			6
144215	V	226037	MantaBND:805:4:5:0:0:0:1	G	[V:845512[G	945	PASS	SVTYPE=BND;MATEID=MantaBND:805:4:5:0:0:0:0;CIPOS=0,16;HOMLEN=16;HOMSEQ=GAGCGATTTGCGGAGC;BND_DEPTH=81;MATE_BND_DEPTH=67	GT:FT:GQ:PL:PR:SR	0/1:PASS:451:995,0,448:12,3:28,29	Translocation	Heterozygous	P0_N2_treated_hermaphrodite	845512	V	16	0	16	0	0	rep.2	42615202	4		16	x		NPAL0A_CE
144215	V	306817	MantaBND:1135:0:2:0:0:0:1	C	C[III:11114137[	187	PASS	SVTYPE=BND;MATEID=MantaBND:1135:0:2:0:0:0:0;CIPOS=0,48;HOMLEN=48;HOMSEQ=CCCCCTGTTTTCAAATGGAAGAGGTGGCCGTGAAAAAAGCGAACCTCG;BND_DEPTH=21;MATE_BND_DEPTH=39	GT:FT:GQ:PL:PR:SR	0/1:PASS:163:237,0,160:9,4:9,4	Translocation	Heterozygous	P0_N2_treated_hermaphrodite	11114137	III	48	0	48	0	0	rep.2	42615202	1		48		PALTTAA3_CE
144215	V	415536	MantaINS:1703:0:0:0:0:0	A	AGAAAAATGTAAAAAAATCGCATGCATTTTTTGCATTTTTCGACATTTTTCTACATTCTTCAAATGTAGAAAAATGTC	999	PASS	END=415536;SVTYPE=INS;SVLEN=77;CIGAR=1M77I;CIPOS=0,8;HOMLEN=8;HOMSEQ=GAAAAATG	GT:FT:GQ:PL:PR:SR	1/1:PASS:71:999,74,0:0,0:0,34	Insertion	Homozygous	P0_N2_treated_hermaphrodite	415536	V	8	0	8	0	0	rep.2	42615202			8
144215	V	686153	MantaBND:514:0:1:0:0:0:0	T	]II:2141116]T	999	PASS	SVTYPE=BND;MATEID=MantaBND:514:0:1:0:0:0:1;CIPOS=0,12;HOMLEN=12;HOMSEQ=TAACAAGGAAAG;BND_DEPTH=110;MATE_BND_DEPTH=77	GT:FT:GQ:PL:PR:SR	0/1:PASS:506:999,0,503:16,10:37,33	Translocation	Heterozygous	P0_N2_treated_hermaphrodite	2141116	II	12	0	12	0	0	rep.2	42615202	3		12	x
144215	V	845496	MantaBND:805:4:5:0:0:0:0	C	[V:226053[C	945	PASS	SVTYPE=BND;MATEID=MantaBND:805:4:5:0:0:0:1;CIPOS=0,16;HOMLEN=16;HOMSEQ=TCCGCAAATCGCTCCT;BND_DEPTH=67;MATE_BND_DEPTH=81	GT:FT:GQ:PL:PR:SR	0/1:PASS:451:995,0,448:12,3:28,29	Translocation	Heterozygous	P0_N2_treated_hermaphrodite	226053	V	16	0	16	0	0	rep.2	42615202	4		16	x	NPAL0A_CE
144215	V	1772176	MantaINS:96:1:1:0:0:0	G	GAGCGCGCTTGCTGCGCTTCGCATTTCTGCATCCGCGGTATTTTGACTTTCCACTGAAAAAAACAGATTTCTCAGATTCATCGAATTTTTAGCTTTAAAATTTTTTTTCTGCATTTTACGAACAAACCTTTTGTTAAACAGTGAAAATCGAATTTAAAACGACTAAAATGAAAGAAATCAACGGGATTTTTCTTATTTTCTAAATATTTTTCTATTAAAAATCGGCTTTAATACAGTTTTGACATTAGGGCCAAAAAATGGTTAAAAACAGATTTTTAATAGAAAAATATTCAGAAAATAAGAAAAATCCCGTTGATTTCTTTTATTTTAATCATTTTAAACTCGATTTTCACTGTTTAACATAAGGGTTGTTCGTAAAATGCAGAAGAAAAATTTTTT…	999	PASS	END=1772176;SVTYPE=INS;SVLEN=475;CIGAR=1M475I;CIPOS=0,8;HOMLEN=8;HOMSEQ=AGCGCGCT	GT:FT:GQ:PL:PR:SR	1/1:PASS:101:999,104,0:0,13:0,23	Insertion	Homozygous	P0_N2_treated_hermaphrodite	1772176	V	8	0	8	0	0	rep.2	42615202			8
144215	V	1772177	MantaBND:96:0:1:0:0:0:0	A	[I:2295529[A	639	PASS	SVTYPE=BND;MATEID=MantaBND:96:0:1:0:0:0:1;CIPOS=0,27;HOMLEN=27;HOMSEQ=GCGCGCTCTAATAATTATTCGGCTTTG;BND_DEPTH=49;MATE_BND_DEPTH=66	GT:FT:GQ:PL:PR:SR	0/1:PASS:274:689,0,271:12,6:16,15	Translocation	Heterozygous	P0_N2_treated_hermaphrodite	2295529	I	27	0	27	0	0	rep.2	42615202	4		27
144215	V	2600122	MantaINS:1741:0:0:0:0:0	G	GAAAAATTCGATGAATTTTTGAGAAAGTATCTGAACCAAAACAAAAAGTTATAAGCAGAATTTGCATAAAATAGTAAAACACATTATTGTGTATCATTTTACAATAAAATTAGATGTGTTTTACTATTTTATGCAACTTCTGCTTATAACTTTTTGTTTTGGTTCAGATACTTTCTC	999	PASS	END=2600122;SVTYPE=INS;SVLEN=176;CIGAR=1M176I;CIPOS=0,8;HOMLEN=8;HOMSEQ=AAAAATTC	GT:FT:GQ:PL:PR:SR	1/1:PASS:174:999,177,0:0,7:0,71	Insertion	Homozygous	P0_N2_treated_hermaphrodite	2600122	V	8	0	8	0	0	rep.2	42615202			8
144215	V	2646697	MantaBND:1199:1:3:0:0:0:0	C	C[X:13479516[	156	PASS	SVTYPE=BND;MATEID=MantaBND:1199:1:3:0:0:0:1;IMPRECISE;CIPOS=-283,284;BND_DEPTH=80;MATE_BND_DEPTH=62	GT:FT:GQ:PL:PR	0/1:PASS:156:206,0,256:19,14	Translocation	Heterozygous	P0_N2_treated_hermaphrodite	13479516	X	0	-283	284	0	0	rep.2	42615202	1		284		PALTTAA1_CE	HAT1_CE
144215	V	2701131	MantaBND:351:0:3:0:0:0:0	T	T]I:11630133]	38	PASS	SVTYPE=BND;MATEID=MantaBND:351:0:3:0:0:0:1;IMPRECISE;CIPOS=-157,158;BND_DEPTH=64;MATE_BND_DEPTH=89	GT:FT:GQ:PL:PR	0/1:PASS:38:88,0,929:62,16	Translocation	Heterozygous	P0_N2_treated_hermaphrodite	11630133	I	0	-157	158	0	0	rep.2	42615202	2		158	x	HAT1_CE
144215	V	4914043	MantaINS:1361:1:1:0:2:0	T	<INS>	999	PASS	END=4914043;SVTYPE=INS;CIPOS=0,6;CIEND=0,6;HOMLEN=6;HOMSEQ=TTTTGA;LEFT_SVINSSEQ=TTTTGATGTACACTCAAAATAATAAAACTGCGTGGCGTGTACTGCAGAAAACCTGATATTTAAGCCCCGCCTTTTT;RIGHT_SVINSSEQ=CCGCTATGTTTAACTCGTTGTGGGCGCGGCAAGCTGTCTCCGCCCGCTGCGAGTTAAACATAGCGGCGCGCGGAACACGTAGGATGTCGGCGGCCTGATATTGGTTGGTCCCCGAATTTTTGCCTTTTCTCCGTGAGTGGACGAGAAAAAGGCGGGGCCTAAATATTAGGTTTTCTGCAGTACACGCCACGCAGTTTTATTA	GT:FT:GQ:PL:PR:SR	1/1:PASS:114:999,117,0:0,5:0,38	Insertion	Homozygous	P0_N2_treated_hermaphrodite	4914043	V	6	0	6	0	6	rep.2	42615202			6
144215	V	4914049	MantaBND:1361:0:1:0:0:0:1	A	ATG[IV:6320432[	999	PASS	SVTYPE=BND;MATEID=MantaBND:1361:0:1:0:0:0:0;SVINSLEN=2;SVINSSEQ=TG;BND_DEPTH=59;MATE_BND_DEPTH=59	GT:FT:GQ:PL:PR:SR	0/1:PASS:140:999,0,137:6,18:13,28	Translocation	Heterozygous	P0_N2_treated_hermaphrodite	6320432	IV	0	0	0	0	0	rep.2	42615202	1	TG	0	x		PALTA3_CE
144215	V	8119372	MantaDUP:TANDEM:1883:0:1:0:0:0	A	<DUP:TANDEM>	99	PASS	END=8122297;SVTYPE=DUP;SVLEN=2925;IMPRECISE;CIPOS=-181,181;CIEND=-187,187	GT:FT:GQ:PL:PR	0/1:PASS:99:149,0,722:49,16	Tandem Duplication	Heterozygous	P0_N2_treated_hermaphrodite	8122297	V	0	-181	181	-187	187	rep.2	42615202			187
144215	V	8158794	MantaINS:1882:0:0:0:3:0	A	<INS>	999	PASS	END=8158794;SVTYPE=INS;CIPOS=0,6;CIEND=0,6;HOMLEN=6;HOMSEQ=ATGATC;LEFT_SVINSSEQ=ATGATCGCTGATGACTGAAAAAAAGAAAAAAAAAGAAAAACTGAAGCCTCGATCAAACTGACCTAAATATTTGTAGGACTTTGATATTTGCTAGCATCATTTATTATTTTCATTCAAATTTA;RIGHT_SVINSSEQ=TTTGCTAGCATCATTTATTATTTTCATTCAAATTTATTTAAAACGTTTCAGGAATCTATGGAGACTCTATCAATGAGATGTCATGGGCAGTTGGAGAGGTTTTAGACAGTCTTGTAAATGCTGGAATTGCTGAAAATACATTGGTTATTTTAATGTCTGATCATGGACCACATGTTGAACT…	GT:FT:GQ:PL:PR:SR	1/1:PASS:107:999,110,0:0,0:0,40	Insertion	Homozygous	P0_N2_treated_hermaphrodite	8158794	V	6	0	6	0	6	rep.2	42615202			6
144215	V	9554051	MantaBND:97:1:5:0:0:0:0	T	[X:466019[T	999	PASS	SVTYPE=BND;MATEID=MantaBND:97:1:5:0:0:0:1;CIPOS=0,37;HOMLEN=37;HOMSEQ=TTTCGCCTTCCGGCAAAAAGGTGGGAGAAAGAAGACG;BND_DEPTH=38;MATE_BND_DEPTH=108	GT:FT:GQ:PL:PR:SR	0/1:PASS:335:999,0,332:18,16:25,30	Translocation	Heterozygous	P0_N2_treated_hermaphrodite	466019	X	37	0	37	0	0	rep.2	42615202	4		37	x
144215	V	9724732	MantaBND:874:2:3:2:1:0:1	A	]IV:4816396]TCGACTA	889	PASS	SVTYPE=BND;MATEID=MantaBND:874:2:3:2:1:0:0;SVINSLEN=6;SVINSSEQ=TCGACT;BND_DEPTH=79;MATE_BND_DEPTH=104	GT:FT:GQ:PL:PR:SR	0/1:PASS:568:939,0,565:21,17:32,20	Translocation	Heterozygous	P0_N2_treated_hermaphrodite	4816396	IV	0	0	0	0	0	rep.2	42615202	3	TCGACT	0	x	CELE14B	IR3_CE
144215	V	10866422	MantaBND:1355:0:1:0:0:0:0	C	[IV:6005802[C	361	PASS	SVTYPE=BND;MATEID=MantaBND:1355:0:1:0:0:0:1;IMPRECISE;CIPOS=-259,259;BND_DEPTH=106;MATE_BND_DEPTH=112	GT:FT:GQ:PL:PR	0/1:PASS:361:411,0,978:68,31	Translocation	Heterozygous	P0_N2_treated_hermaphrodite	6005802	IV	0	-259	259	0	0	rep.2	42615202	4		259
144215	V	11690781	MantaINS:1952:0:0:0:0:0	A	AAAAATTTTCAATAAAAAATCAAATAAATAAATAAATAAATATGCTGATAAAAACACACAAACTATTGAATTGATATCACTGATAAAATAATAAAGAATAATCAGTCTTGATTTTTGAATAAAAATTCCAAAGCAAGACTGATTATTCTTTATTATTTTATCAGTGATATCAATTCAATAGTTTGTGTGTTTTTATCAGCATATTTATTTATTTATTTATTTGATTTTTTATTGAAAATTTTTTATTG	999	PASS	END=11690781;SVTYPE=INS;SVLEN=247;CIGAR=1M247I;CIPOS=0,8;HOMLEN=8;HOMSEQ=AAAATTTT	GT:FT:GQ:PL:PR:SR	1/1:PASS:130:999,133,0:0,1:0,54	Insertion	Homozygous	P0_N2_treated_hermaphrodite	11690781	V	8	0	8	0	0	rep.2	42615202			8
144215	V	11690782	MantaINS:1956:0:0:0:0:0	A	AAAATTTTCAATAAAAAATCAAATAAATAAATAAATAAATATGCTGATAAAAACACACAAACTATTGAATTGATATCACTGATAAAATAATAAAGAATAATCAGTCTTGATTTTTGAATAAAAATTCCAAAGCAAGACTGATTATTCTTTATTATTTTATCAGTGATATCAATTCAATAGTTTGTGTGTTTTTATCAGCATATTTATTTATTTATTTATTTGATTTTTTATTGAAAATTTTTTATTGT	999	PASS	END=11690782;SVTYPE=INS;SVLEN=247;CIGAR=1M247I;CIPOS=0,7;HOMLEN=7;HOMSEQ=AAATTTT	GT:FT:GQ:PL:PR:SR	1/1:PASS:71:999,74,0:0,1:0,55	Insertion	Homozygous	P0_N2_treated_hermaphrodite	11690782	V	7	0	7	0	0	rep.2	42615202			7
144215	V	12167424	MantaINS:1962:0:0:0:0:0	C	CCCTGGTGGTCCTGGTGGTCCGGCTGGGCATGTGATGCAAGCAGAAGCAGATGAGTGTTGTTCAGCAACTCCAGCTCCTCCAGCTTGTCCATCACCTCCTGGTTCTCCTGCCTCTCCTGGAGCACCATCCTCT	999	PASS	END=12167424;SVTYPE=INS;SVLEN=132;CIGAR=1M132I;CIPOS=0,20;HOMLEN=20;HOMSEQ=CCTGGTGGTCCTGGTGGTCC	GT:FT:GQ:PL:PR:SR	1/1:PASS:167:999,170,0:0,0:0,67	Insertion	Homozygous	P0_N2_treated_hermaphrodite	12167424	V	20	0	20	0	0	rep.2	42615202			20
144215	V	12864683	MantaBND:394:2:4:0:0:0:0	A	A[III:55714[	999	PASS	SVTYPE=BND;MATEID=MantaBND:394:2:4:0:0:0:1;BND_DEPTH=39;MATE_BND_DEPTH=75	GT:FT:GQ:PL:PR:SR	0/1:PASS:375:999,0,372:7,4:29,25	Translocation	Heterozygous	P0_N2_treated_hermaphrodite	55714	III	0	0	0	0	0	rep.2	42615202	1		0
144215	V	13362655	MantaDUP:TANDEM:1996:0:1:0:0:0	T	<DUP:TANDEM>	999	PASS	END=13367099;SVTYPE=DUP;SVLEN=4444;CIPOS=0,2;CIEND=0,2;HOMLEN=2;HOMSEQ=AT	GT:FT:GQ:PL:PR:SR	0/1:PASS:904:999,0,901:36,24:46,36	Tandem Duplication	Heterozygous	P0_N2_treated_hermaphrodite	13367099	V	2	0	2	0	2	rep.2	42615202			2
144215	V	16812044	MantaINS:1558:2:2:0:0:0	G	GCTCCGCCCACTTTTGAACCAATCAGACGGAGTGGGCGGAGTTCGAAGACGCTGATTGGTTGGAAGCATTCCCATTTCGATTTTATATTAAAAAGAGATGTTTCGAACCAATCAGCGTCTTCGAA	999	PASS	END=16812044;SVTYPE=INS;SVLEN=124;CIGAR=1M124I;CIPOS=0,11;HOMLEN=11;HOMSEQ=CTCCGCCCACT	GT:FT:GQ:PL:PR:SR	1/1:PASS:61:999,64,0:0,0:1,35	Insertion	Homozygous	P0_N2_treated_hermaphrodite	16812044	V	11	0	11	0	0	rep.2	42615202			11
144215	V	17040145	MantaBND:1135:1:3:0:0:0:1	A	A]III:11114437]	525	PASS	SVTYPE=BND;MATEID=MantaBND:1135:1:3:0:0:0:0;CIPOS=0,59;HOMLEN=59;HOMSEQ=CACGGGTTTCTAATTTCCCCCCTGTTTTCAAATGGAAGAGGTGGCCGTGAAAAAAGCGA;BND_DEPTH=29;MATE_BND_DEPTH=57	GT:FT:GQ:PL:PR:SR	0/1:PASS:150:575,0,147:11,10:6,12	Translocation	Heterozygous	P0_N2_treated_hermaphrodite	11114437	III	59	0	59	0	0	rep.2	42615202	2		59	x	LINE2F_CE
144215	V	17040308	MantaBND:1135:0:1:0:0:0:1	T	[III:11114057[T	30	PASS	SVTYPE=BND;MATEID=MantaBND:1135:0:1:0:0:0:0;IMPRECISE;CIPOS=-251,252;BND_DEPTH=36;MATE_BND_DEPTH=50	GT:FT:GQ:PL:PR	0/1:PASS:30:80,0,549:37,11	Translocation	Heterozygous	P0_N2_treated_hermaphrodite	11114057	III	0	-251	252	0	0	rep.2	42615202	4		252	x	LINE2F_CE
144215	V	17490400	MantaBND:981:1:2:1:0:0:1	G	]IV:16571487]G	504	PASS	SVTYPE=BND;MATEID=MantaBND:981:1:2:1:0:0:0;IMPRECISE;CIPOS=-168,168;EVENT=MantaBND:981:1:2:0:0:0:0;JUNCTION_QUAL=20;BND_DEPTH=51;MATE_BND_DEPTH=25	GT:FT:GQ:PL:PR	0/1:PASS:211:554,0,208:6,5	Translocation	Heterozygous	P0_N2_treated_hermaphrodite	16571487	IV	0	-168	168	0	0	rep.2	42615202	3		168	x	(A)n	(CCGGACG)n
144215	V	17490437	MantaBND:981:1:2:0:0:0:1	G	G[IV:16571333[	504	PASS	SVTYPE=BND;MATEID=MantaBND:981:1:2:0:0:0:0;CIPOS=0,38;HOMLEN=38;HOMSEQ=CTAGGGCTGTGCAACCGGACGTCCGGTTTTTTCGGACG;EVENT=MantaBND:981:1:2:0:0:0:0;JUNCTION_QUAL=434;BND_DEPTH=43;MATE_BND_DEPTH=70	GT:FT:GQ:PL:PR:SR	0/1:PASS:211:554,0,208:8,7:9,14	Translocation	Heterozygous	P0_N2_treated_hermaphrodite	16571333	IV	38	0	38	0	0	rep.2	42615202	1		38	x
144215	V	18566342	MantaBND:1182:1:3:0:0:0:0	C	]III:12132033]C	56	PASS	SVTYPE=BND;MATEID=MantaBND:1182:1:3:0:0:0:1;IMPRECISE;CIPOS=-118,119;BND_DEPTH=54;MATE_BND_DEPTH=63	GT:FT:GQ:PL:PR	0/1:PASS:56:106,0,633:43,13	Translocation	Heterozygous	P0_N2_treated_hermaphrodite	12132033	III	0	-118	119	0	0	rep.2	42615202	3		119	x	(GGCTTA)n	(CTTAG)n
144215	V	18682059	MantaDEL:2160:0:0:0:0:1	TAAAATTTCAAAATTCCAAAAAATTTAAAAAATTAAAAATTCCACAAAATTTCAAAATTCCAAAAAATTTCAAAATTCCACAAAATTTCAAAATTCCAAAAAATTTCTAAATTTCTAAAATTTCAAAATTCCAAAAAATTTAAAAAATTAAAAATTCCACAAAATTTCAAAATTCCAAAAAATTTCAAAATTCCAC	T	643	PASS	END=18682254;SVTYPE=DEL;SVLEN=-195;CIGAR=1M195D;CIPOS=0,24;HOMLEN=24;HOMSEQ=AAAATTTCAAAATTCCAAAAAATT	GT:FT:GQ:PL:PR:SR	0/1:PASS:359:693,0,356:15,2:39,21	Deletion	Heterozygous	P0_N2_treated_hermaphrodite	18682254	V	24	0	24	0	0	rep.2	42615202			24
144215	V	18682579	MantaDEL:2164:0:0:0:0:0	AAAAAATTTCAAAATTTCTAAAATTTCAAAATTCCAAAAAATTTCAAAAATTTCAAAATTCCAAAAAATTCAAAATTCCAAAAAATTTCAGAATTCCAAAAAATTTCAAAATTCCAAAAAATTTCTAAATTTCTAAAATTTCAAAATTCCAAAAAATTTAAAAAATTAAAAATTCCACAAAATTTCAAAATTCCAAAAAATTTCAAAATTCCACAAAATTTCAAAATTCCAAAAAATTCAAAATTCCAAAAAATTTCAGAATTCCAAGAAATTTCAAAATTCCAAGAAATTTCAAAATTCCAAAAAATTTCAAAATTTTCAAAATTCCAAAAAATTTCAAAATTTCTAAAATTTCAAAATTCCAAAAAATTTAAAAATTTAAAAATTCCACAAAATTTC…	A	601	PASS	END=18683092;SVTYPE=DEL;SVLEN=-513;CIGAR=1M513D;CIPOS=0,16;HOMLEN=16;HOMSEQ=AAAAATTTCAAAATTT	GT:FT:GQ:PL:PR:SR	0/1:PASS:601:651,0,701:24,4:46,22	Deletion	Heterozygous	P0_N2_treated_hermaphrodite	18683092	V	16	0	16	0	0	rep.2	42615202			16
144215	V	18858817	MantaINS:2119:1:1:2:0:0	T	TATTTCGGCCTGAAATTTCAAATTTTCAGAACCTAGCCGATATGGGTGTCAAAATTTCGCAAATTTCATGGAGAATTCAAATTTTAATAGGAAAAACTACGAAAATCTCAAAATTTAGCAAATTTACAAGTGCAGGGACATGGGACACTCCACGTAAGATTTGAGTAACATTTTCGAAATCTCTGCGAAAATTTGACACCCATATTGACTGGGTTCTGAGAAATTTGAGTTTCCGGGCCGAAATAGGCCG	999	PASS	END=18858817;SVTYPE=INS;SVLEN=249;CIGAR=1M249I;CIPOS=0,32;HOMLEN=32;HOMSEQ=ATTTCGGCCTGAAATTTCAAATTTTCAGAACC	GT:FT:GQ:PL:PR:SR	1/1:PASS:91:999,94,0:0,0:0,33	Insertion	Homozygous	P0_N2_treated_hermaphrodite	18858817	V	32	0	32	0	0	rep.2	42615202			32
144215	V	18995435	MantaBND:54:4:5:0:0:0:0	C	[III:467778[C	657	PASS	SVTYPE=BND;MATEID=MantaBND:54:4:5:0:0:0:1;CIPOS=0,2;HOMLEN=2;HOMSEQ=AC;BND_DEPTH=47;MATE_BND_DEPTH=99	GT:FT:GQ:PL:PR:SR	0/1:PASS:657:707,0,986:37,3:60,19	Translocation	Heterozygous	P0_N2_treated_hermaphrodite	467778	III	2	0	2	0	0	rep.2	42615202	4		2		PAL5A_CE	PAL8D_CE
144215	V	19877606	MantaDEL:423:1:1:2:0:0	TTTTTTTTCATCACACTTAATTAAAAAATTCATATTCTTCATGAAATTCTACACATTTCCCAATTTGGAA	TGAAT	547	PASS	END=19877675;SVTYPE=DEL;SVLEN=-69;CIGAR=1M4I69D	GT:FT:GQ:PL:PR:SR	0/1:PASS:532:597,0,529:5,0:40,16	Deletion	Heterozygous	P0_N2_treated_hermaphrodite	19877675	V	0	0	0	0	0	rep.2	42615202			0
144215	V	20398647	MantaDUP:TANDEM:2170:0:2:0:1:0	A	<DUP:TANDEM>	383	PASS	END=20398856;SVTYPE=DUP;SVLEN=209;CIPOS=0,21;CIEND=0,21;HOMLEN=21;HOMSEQ=AGGTTTTTAGGGATTTTTTTT	GT:FT:GQ:PL:PR:SR	0/1:PASS:383:433,0,424:19,0:27,18	Tandem Duplication	Heterozygous	P0_N2_treated_hermaphrodite	20398856	V	21	0	21	0	21	rep.2	42615202			21
144215	V	20398658	MantaINS:2170:0:0:0:0:0	GGATT	GCGATTTTTAGAAATTTTGTGGAATTTTAGAACGTTTTTAAGAGTTTTTTGTGAATTTTTGGAACTTATTGAGGTTTTTAGGGATTCTTTTTTTGCAATTTTTGCGGACTTTTTGGAGGTTTTGGGAGAAATTTTGAGCGTTTTGGAAGGTTTTTAGACGATTTTTTTTGCAAATTTTGGAGATTTTTAGTATATTTTTCAATTTTAATCGGAATTTTAGAGAGAATCAGAAGGTTTTTGGGAGTTTTTTTTGCGAATTTTTGGAACTTTCTGAGGTTTTTAGAGA	999	PASS	END=20398662;SVTYPE=INS;SVLEN=285;CIGAR=1M285I4D	GT:FT:GQ:PL:PR:SR	1/1:PASS:50:999,53,0:2,0:7,37	Insertion	Homozygous	P0_N2_treated_hermaphrodite	20398662	V	0	0	0	0	0	rep.2	42615202			0
144215	V	20705450	MantaBND:981:4:6:0:1:0:1	A	A[III:4670588[	875	PASS	SVTYPE=BND;MATEID=MantaBND:981:4:6:0:1:0:0;BND_DEPTH=119;MATE_BND_DEPTH=44	GT:FT:GQ:PL:PR:SR	0/1:PASS:251:925,0,248:1,7:31,24	Translocation	Heterozygous	P0_N2_treated_hermaphrodite	4670588	III	0	0	0	0	0	rep.2	42615202	1		0	x
144215	X	216891	MantaBND:1259:1:2:0:0:0:1	T	T]X:256071]	999	PASS	SVTYPE=BND;MATEID=MantaBND:1259:1:2:0:0:0:0;CIPOS=0,5;HOMLEN=5;HOMSEQ=GATCT;BND_DEPTH=34;MATE_BND_DEPTH=24	GT:FT:GQ:PL:PR:SR	1/1:PASS:77:999,80,0:0,20:0,15	Translocation	Homozygous	P0_N2_treated_hermaphrodite	256071	X	5	0	5	0	0	rep.2	42615202	2		5	x
144215	X	256025	MantaBND:1259:0:1:0:0:0:0	T	T[IV:1312605[	381	PASS	SVTYPE=BND;MATEID=MantaBND:1259:0:1:0:0:0:1;CIPOS=0,46;HOMLEN=46;HOMSEQ=AAAAATTGAATAAAACAGTGAAAAAATCGTGATTTTGACAGAGATC;BND_DEPTH=29;MATE_BND_DEPTH=53	GT:FT:GQ:PL:PR:SR	0/1:PASS:281:431,0,278:6,4:20,9	Translocation	Heterozygous	P0_N2_treated_hermaphrodite	1312605	IV	46	0	46	0	0	rep.2	42615202	1		46
144215	X	256066	MantaBND:1259:1:2:0:0:0:0	G	G]X:216896]	999	PASS	SVTYPE=BND;MATEID=MantaBND:1259:1:2:0:0:0:1;CIPOS=0,5;HOMLEN=5;HOMSEQ=AGATC;BND_DEPTH=24;MATE_BND_DEPTH=34	GT:FT:GQ:PL:PR:SR	1/1:PASS:77:999,80,0:0,20:0,15	Translocation	Homozygous	P0_N2_treated_hermaphrodite	216896	X	5	0	5	0	0	rep.2	42615202	2		5	x
144215	X	465982	MantaBND:97:1:5:0:0:0:1	G	[V:9554088[G	999	PASS	SVTYPE=BND;MATEID=MantaBND:97:1:5:0:0:0:0;CIPOS=0,37;HOMLEN=37;HOMSEQ=TCTTCTTTCTCCCACCTTTTTGCCGGAAGGCGAAAAA;BND_DEPTH=108;MATE_BND_DEPTH=38	GT:FT:GQ:PL:PR:SR	0/1:PASS:335:999,0,332:18,16:25,30	Translocation	Heterozygous	P0_N2_treated_hermaphrodite	9554088	V	37	0	37	0	0	rep.2	42615202	4		37	x
144215	X	1887948	MantaBND:362:0:1:0:0:0:1	T	T]I:11713576]	115	PASS	SVTYPE=BND;MATEID=MantaBND:362:0:1:0:0:0:0;BND_DEPTH=79;MATE_BND_DEPTH=75	GT:FT:GQ:PL:PR:SR	0/1:PASS:115:165,0,999:33,7:81,15	Translocation	Heterozygous	P0_N2_treated_hermaphrodite	11713576	I	0	0	0	0	0	rep.2	42615202	2		0	x
144215	X	8651737	MantaBND:499:0:2:0:0:0:1	G	]II:1659790]G	666	PASS	SVTYPE=BND;MATEID=MantaBND:499:0:2:0:0:0:0;CIPOS=0,9;HOMLEN=9;HOMSEQ=CATAGGCCA;EVENT=MantaBND:499:0:2:0:0:0:0;JUNCTION_QUAL=608;BND_DEPTH=76;MATE_BND_DEPTH=42	GT:FT:GQ:PL:PR:SR	0/1:PASS:666:716,0,950:16,6:25,15	Translocation	Heterozygous	P0_N2_treated_hermaphrodite	1659790	II	9	0	9	0	0	rep.2	42615202	3		9	x
144215	X	8651862	MantaBND:499:0:2:1:0:0:0	A	A[II:1659321[	666	PASS	SVTYPE=BND;MATEID=MantaBND:499:0:2:1:0:0:1;IMPRECISE;CIPOS=-167,167;EVENT=MantaBND:499:0:2:0:0:0:0;JUNCTION_QUAL=9;BND_DEPTH=56;MATE_BND_DEPTH=45	GT:FT:GQ:PL:PR	0/1:PASS:666:716,0,950:40,12	Translocation	Heterozygous	P0_N2_treated_hermaphrodite	1659321	II	0	-167	167	0	0	rep.2	42615202	1		167	x	(TTGTAT)n	LONGPAL3
144215	X	12190992	MantaBND:2477:0:1:0:0:0:1	C	C]X:12199124]	999	PASS	SVTYPE=BND;MATEID=MantaBND:2477:0:1:0:0:0:0;CIPOS=0,4;HOMLEN=4;HOMSEQ=GATC;BND_DEPTH=47;MATE_BND_DEPTH=44	GT:FT:GQ:PL:PR:SR	1/1:PASS:77:999,80,0:0,17:0,23	Translocation	Homozygous	P0_N2_treated_hermaphrodite	12199124	X	4	0	4	0	0	rep.2	42615202	2		4	x
144215	X	12199120	MantaBND:2477:0:1:0:0:0:0	T	T]X:12190996]	999	PASS	SVTYPE=BND;MATEID=MantaBND:2477:0:1:0:0:0:1;CIPOS=0,4;HOMLEN=4;HOMSEQ=GATC;BND_DEPTH=44;MATE_BND_DEPTH=47	GT:FT:GQ:PL:PR:SR	1/1:PASS:77:999,80,0:0,17:0,23	Translocation	Homozygous	P0_N2_treated_hermaphrodite	12190996	X	4	0	4	0	0	rep.2	42615202	2		4	x
144215	X	13479516	MantaBND:1199:1:3:0:0:0:1	A	]V:2646697]A	156	PASS	SVTYPE=BND;MATEID=MantaBND:1199:1:3:0:0:0:0;IMPRECISE;CIPOS=-157,157;BND_DEPTH=62;MATE_BND_DEPTH=80	GT:FT:GQ:PL:PR	0/1:PASS:156:206,0,256:19,14	Translocation	Heterozygous	P0_N2_treated_hermaphrodite	2646697	V	0	-157	157	0	0	rep.2	42615202	3		157	x	HAT1_CE	PALTTAA1_CE
144215	X	14788284	MantaDEL:2548:0:1:0:0:0	TGCGTCCGGTTTGGGGTAGCTTTCCATGGCGGCCGACAATTTCCGAGTTTCGCCACTGACTATAAAATTGCTGATTAAGTATAGTTAGTCGAGAAACTCGGAAATTGTCGGCCGCCGTGAAAAGCTACCCCAAACCGGACACATGG	T	95	PASS	END=14788429;SVTYPE=DEL;SVLEN=-145;CIGAR=1M145D;CIPOS=0,9;HOMLEN=9;HOMSEQ=GCGTCCGGT	GT:FT:GQ:PL:PR:SR	0/1:PASS:95:145,0,479:16,0:35,6	Deletion	Heterozygous	P0_N2_treated_hermaphrodite	14788429	X	9	0	9	0	0	rep.2	42615202			9
144217	I	229115	MantaBND:2:0:2:0:0:0:0	A	]IV:6006461]A	90	PASS	SVTYPE=BND;MATEID=MantaBND:2:0:2:0:0:0:1;IMPRECISE;CIPOS=-324,325;BND_DEPTH=94;MATE_BND_DEPTH=53	GT:FT:GQ:PL:PR	0/1:PASS:90:140,0,912:61,16	Translocation	Heterozygous	P0_N2_treated_hermaphrodite	6006461	IV	0	-324	325	0	0	rep.3	49230678	3		325		CER12-I_CE
144217	I	238546	MantaBND:5:0:2:0:0:0:0	G	G]V:10866803]	46	PASS	SVTYPE=BND;MATEID=MantaBND:5:0:2:0:0:0:1;IMPRECISE;CIPOS=-278,279;BND_DEPTH=117;MATE_BND_DEPTH=143	GT:FT:GQ:PL:PR	0/1:PASS:46:96,0,999:85,18	Translocation	Heterozygous	P0_N2_treated_hermaphrodite	10866803	V	0	-278	279	0	0	rep.3	49230678	2		279	x
144217	I	678691	MantaDEL:21:0:0:0:0:0	TCCATATGATCCGTCGAAGCTGAAGGATCAGAACATCAGGAGGTACCCATGTGATCATTCGGCTCTGAAAGATCAGATCATCAGGCAGAGCCTCATGTTCTTTTGGAGCTGAAGGATCAGAACATCAGGAAGAGCCTCATGATCCTTTGGATCTGAAGGATCAGACCATCAGGAGGTACCCTTACGATCCTTCTTATCTGAAAGATCAGATCATCAGAAGGTA	T	405	PASS	END=678913;SVTYPE=DEL;SVLEN=-222;CIGAR=1M222D;CIPOS=0,4;HOMLEN=4;HOMSEQ=CCAT	GT:FT:GQ:PL:PR:SR	0/1:PASS:405:455,0,999:38,2:84,16	Deletion	Heterozygous	P0_N2_treated_hermaphrodite	678913	I	4	0	4	0	0	rep.3	49230678			4
144217	I	1059751	MantaINS:29:0:0:1:3:0	G	<INS>	999	PASS	END=1059751;SVTYPE=INS;CIPOS=0,11;CIEND=0,11;HOMLEN=11;HOMSEQ=GAAATGGGCGG;LEFT_SVINSSEQ=GAAATGGGCGGAGTTTTGGAGTACAAAAGCCCCGCCCATTTCTGACTAGGATTCGGGGAAATTGCTTTAAAACACGCCTATGGTACCATAGTGATCGAATTTCATAATAAAAAATTTTTAAAAAATTGTCTAAATTTTATATGATTTTTTGAAAATTGGAAAAATCTCAGTTTTCCCCCCTAATTCCTATTTTAATTACCGCCAATTGGATTTGTTCGGTGG;RIGHT_SVINSSEQ=AATGCAAATAATGCAAGCGCGCTCCACCGAACCAATCCAATTGGCGGTAATTAAAATAGGAATTAGGGGGGAA…	GT:FT:GQ:PL:PR:SR	1/1:PASS:186:999,189,0:0,3:0,68	Insertion	Homozygous	P0_N2_treated_hermaphrodite	1059751	I	11	0	11	0	11	rep.3	49230678			11
144217	I	2002703	MantaBND:55:0:1:0:0:0:1	C	]III:468056]C	880	PASS	SVTYPE=BND;MATEID=MantaBND:55:0:1:0:0:0:0;BND_DEPTH=71;MATE_BND_DEPTH=109	GT:FT:GQ:PL:PR:SR	0/1:PASS:880:930,0,999:60,7:90,24	Translocation	Heterozygous	P0_N2_treated_hermaphrodite	468056	III	0	0	0	0	0	rep.3	49230678	3		0	x	PAL5A_CE	CEMUDR1
144217	I	2652464	MantaBND:82:0:1:0:1:0:1	A	A[X:466044[	871	PASS	SVTYPE=BND;MATEID=MantaBND:82:0:1:0:1:0:0;CIPOS=0,4;HOMLEN=4;HOMSEQ=GTGG;BND_DEPTH=33;MATE_BND_DEPTH=134	GT:FT:GQ:PL:PR:SR	0/1:PASS:325:921,0,322:17,3:30,27	Translocation	Heterozygous	P0_N2_treated_hermaphrodite	466044	X	4	0	4	0	0	rep.3	49230678	1		4	x
144217	I	2893796	MantaBND:91:0:3:0:0:0:0	A	A]I:3515369]	76	PASS	SVTYPE=BND;MATEID=MantaBND:91:0:3:0:0:0:1;IMPRECISE;CIPOS=-224,225;BND_DEPTH=78;MATE_BND_DEPTH=61	GT:FT:GQ:PL:PR	0/1:PASS:76:126,0,177:13,9	Translocation	Heterozygous	P0_N2_treated_hermaphrodite	3515369	I	0	-224	225	0	0	rep.3	49230678	2		225			PALTTAA3_CE
144217	I	3515369	MantaBND:91:0:3:0:0:0:1	T	T]I:2893796]	76	PASS	SVTYPE=BND;MATEID=MantaBND:91:0:3:0:0:0:0;IMPRECISE;CIPOS=-191,192;BND_DEPTH=61;MATE_BND_DEPTH=78	GT:FT:GQ:PL:PR	0/1:PASS:76:126,0,177:13,9	Translocation	Heterozygous	P0_N2_treated_hermaphrodite	2893796	I	0	-191	192	0	0	rep.3	49230678	2		192		PALTTAA3_CE
144217	I	4548889	MantaINS:157:0:0:1:0:0	G	GAATATATTCCAAAATATATTCCAGAATATATTCCAGAATATACTCCAAAATATATTCCAGAGTATATTCCAGAATATATTCCAGAATTTATTCCAGAATATATTCCAGAATATATTCCAAAATATATTTCAGAATATATTCCAAAATATATTCCAGAATTTATTTCAGAATATATTCCAGAATATATTCCAGAATATATTCCAGAATATATTCCAA	999	PASS	END=4548889;SVTYPE=INS;SVLEN=216;CIGAR=1M216I;CIPOS=0,42;HOMLEN=42;HOMSEQ=AATATATTCCAAAATATATTCCAGAATATATTCCAGAATATA	GT:FT:GQ:PL:PR:SR	1/1:PASS:103:999,106,0:0,0:0,39	Insertion	Homozygous	P0_N2_treated_hermaphrodite	4548889	I	42	0	42	0	0	rep.3	49230678			42
144217	I	4548929	MantaBND:157:0:3:1:0:0:0	A	]IV:6470041]A	55	PASS	SVTYPE=BND;MATEID=MantaBND:157:0:3:1:0:0:1;IMPRECISE;CIPOS=-295,295;BND_DEPTH=99;MATE_BND_DEPTH=57	GT:FT:GQ:PL:PR	0/1:PASS:55:105,0,518:35,11	Translocation	Heterozygous	P0_N2_treated_hermaphrodite	6470041	IV	0	-295	295	0	0	rep.3	49230678	3		295	x	(TTTTTA)n
144217	I	6521294	MantaINS:209:0:0:0:0:0	A	AGATCGAAACAATTATTGGAAATGTATTAAATGAAATGAAATCAGAATTGCATTTAGGGGGTAGTAGTCGCATCTTTAGTCAGATTATTCAGATATAGTATGAAGTTTTTAGATAATAAATCAATTCTTTCAGACGTTTCTTGTGGAGTGGGCATCATTTATTTTGGCCAAAACGTTTTCTCACTCACACGAAAGAATAGGAACAAACTGTGCAAATCCAATAGATTCTTGTT	999	PASS	END=6521294;SVTYPE=INS;SVLEN=232;CIGAR=1M232I;CIPOS=0,5;HOMLEN=5;HOMSEQ=GATCG	GT:FT:GQ:PL:PR:SR	1/1:PASS:151:999,154,0:0,2:0,61	Insertion	Homozygous	P0_N2_treated_hermaphrodite	6521294	I	5	0	5	0	0	rep.3	49230678			5
144217	I	8054335	MantaBND:15:1:2:0:0:0:0	A	A[IV:8566417[	517	PASS	SVTYPE=BND;MATEID=MantaBND:15:1:2:0:0:0:1;CIPOS=0,37;HOMLEN=37;HOMSEQ=ACTCGGCATTTGGCTCTAGCTTCTTGCCCAAGTTTAG;BND_DEPTH=49;MATE_BND_DEPTH=75	GT:FT:GQ:PL:PR:SR	0/1:PASS:382:567,0,379:11,4:25,16	Translocation	Heterozygous	P0_N2_treated_hermaphrodite	8566417	IV	37	0	37	0	0	rep.3	49230678	1		37	x
144217	I	8454802	MantaINS:247:0:0:0:6:0	T	<INS>	999	PASS	END=8454802;SVTYPE=INS;LEFT_SVINSSEQ=TAGGTGATTGGTAGGTTAGATATTACATATAGGGGGGGGGGGGGGGCATTGACAGAATTATCTTTTCGATTGGCGACATTTTTTATGGGTAACTATATTTGTATATAATAAAAAAAAA;RIGHT_SVINSSEQ=TCATTACGGGAACGTCGCAAAGTCAAATAGTTGGCAAAGTGGAGAGACGGCAGACATGACGTGGCACCAACCAGCGAAAACACGCAAACGGCGATGATCCGGAAATGGCAGAAAAAAACGAC	GT:FT:GQ:PL:PR:SR	1/1:PASS:154:999,157,0:0,0:0,60	Insertion	Homozygous	P0_N2_treated_hermaphrodite	8454802	I	0	0	0	0	0	rep.3	49230678			0
144217	I	8660430	MantaBND:262:0:0:1:0:0:1	T	T]I:8660636]	207	PASS	SVTYPE=BND;MATEID=MantaBND:262:0:0:1:0:0:0;IMPRECISE;CIPOS=-307,307;BND_DEPTH=91;MATE_BND_DEPTH=55	GT:FT:GQ:PL:PR	0/1:PASS:207:257,0,361:26,17	Translocation	Heterozygous	P0_N2_treated_hermaphrodite	8660636	I	0	-307	307	0	0	rep.3	49230678	2		307	x	CELE14A
144217	I	8660636	MantaBND:262:0:0:1:0:0:0	T	T]I:8660430]	207	PASS	SVTYPE=BND;MATEID=MantaBND:262:0:0:1:0:0:1;IMPRECISE;CIPOS=-166,167;BND_DEPTH=55;MATE_BND_DEPTH=91	GT:FT:GQ:PL:PR	0/1:PASS:207:257,0,361:26,17	Translocation	Heterozygous	P0_N2_treated_hermaphrodite	8660430	I	0	-166	167	0	0	rep.3	49230678	2		167	x
144217	I	11175582	MantaINS:320:0:0:0:4:0	C	<INS>	999	PASS	END=11175582;SVTYPE=INS;CIPOS=0,6;CIEND=0,6;HOMLEN=6;HOMSEQ=CTCGTG;LEFT_SVINSSEQ=CTCGTGGATTACACGAGCACTGCGTAAATCGACACATGACTAATATTGGGCTTTTCCAATTTAAATCGACTATTTTAAGCTAAAAGTTGCTTGATTTTTAAGAAAAAAAAAGAAG;RIGHT_SVINSSEQ=ATATTCGGTCATTTGTAGTTTTTAACATAAATTTTACATTTTTTTTCTTAAAAATCACGCAATTTTTAGCCTAAAAGTGTCGATTTAAGTTGGAAAAGCCAAAATATTAGTAATGTGTCGATTGACGCAGTG	GT:FT:GQ:PL:PR:SR	1/1:PASS:118:999,121,0:0,2:0,44	Insertion	Homozygous	P0_N2_treated_hermaphrodite	11175582	I	6	0	6	0	6	rep.3	49230678			6
144217	I	11511638	MantaBND:91:1:6:0:0:0:1	G	G]IV:17326133]	118	PASS	SVTYPE=BND;MATEID=MantaBND:91:1:6:0:0:0:0;IMPRECISE;CIPOS=-271,272;BND_DEPTH=55;MATE_BND_DEPTH=54	GT:FT:GQ:PL:PR	0/1:PASS:118:168,0,273:20,13	Translocation	Heterozygous	P0_N2_treated_hermaphrodite	17326133	IV	0	-271	272	0	0	rep.3	49230678	2		272	x	HAT3_CE	PALTTAA3_CE
144217	I	11630107	MantaBND:332:0:3:0:0:0:1	T	T]V:2701124]	136	PASS	SVTYPE=BND;MATEID=MantaBND:332:0:3:0:0:0:0;IMPRECISE;CIPOS=-302,302;BND_DEPTH=99;MATE_BND_DEPTH=53	GT:FT:GQ:PL:PR	0/1:PASS:136:186,0,767:52,17	Translocation	Heterozygous	P0_N2_treated_hermaphrodite	2701124	V	0	-302	302	0	0	rep.3	49230678	2		302	x		HAT1_CE
144217	I	12738722	MantaINS:359:0:0:0:0:0	A	AATCCTTATGATCCTCATCTGGGTAGCCTAGGATAAACATCGGAACGGGAGGATCTGCTTCAAAGATCTTTGGGATCCTCGGCCATACCACTTGAGCTATGAATCTTCAGAAAGATCTGTAGGATCCAGGGGCTACGATCTTCATGGCAAGCTAGGATCCTGAACTAGGTCACTCCCGCTCCTCCAGAATTTTCACTAGGAAAACCAGGTTCCGAAGATCCGTGGAATCTTATGAAGCTGCTCTTCAATCTCTTCAATCAGTATGGGTGATGCTGATGCTGAAGATCTGATAATTGACAGAGG	999	PASS	END=12738722;SVTYPE=INS;SVLEN=302;CIGAR=1M302I;CIPOS=0,19;HOMLEN=19;HOMSEQ=ATCCTTATGATCCTCATCT	GT:FT:GQ:PL:PR:SR	1/1:PASS:113:999,116,0:1,0:0,51	Insertion	Homozygous	P0_N2_treated_hermaphrodite	12738722	I	19	0	19	0	0	rep.3	49230678			19
144217	I	13689616	MantaDEL:379:0:1:0:0:0	CAGATTTGTATGCCAAATTCTATAATCCTTTCTCTTTCTGGATATAATAAATCTCGTGACTT	C	89	PASS	END=13689677;SVTYPE=DEL;SVLEN=-61;CIGAR=1M61D	GT:FT:GQ:PL:PR:SR	0/1:PASS:89:139,0,762:8,0:56,6	Deletion	Heterozygous	P0_N2_treated_hermaphrodite	13689677	I	0	0	0	0	0	rep.3	49230678			0
144217	I	14340289	MantaBND:402:1:2:0:0:0:0	C	C]V:4248552]	436	PASS	SVTYPE=BND;MATEID=MantaBND:402:1:2:0:0:0:1;CIPOS=0,7;HOMLEN=7;HOMSEQ=GCAGTGC;BND_DEPTH=33;MATE_BND_DEPTH=38	GT:FT:GQ:PL:PR:SR	0/1:PASS:162:486,0,159:5,4:12,11	Translocation	Heterozygous	P0_N2_treated_hermaphrodite	4248552	V	7	0	7	0	0	rep.3	49230678	2		7	x
144217	I	14425428	MantaDEL:397:0:0:0:0:0	CAGCAATTTTGCCTAATTTAGACTACAAACTACAGTTATTTGCAATTTGGCACAGTCTGTCTTGATTACTATAATGCAGTAGCAGTAGTCGAAATTTCAAAAAAAATCGCCAAATTCGAATTCAATTTTCTGAGAAAATTCTAATTTTCCTGTTAGATATGTTTTGGGCTCTGCTGATCTGTTGGAAAATGCAAAAAATTCGGTGAAAATCTGTTGAAAACTAGGAATTTAGACTAAATTGACGATTGGTTGAGGCTATCGGACTACAAAC	CTATATTTGGAGCTA	999	PASS	END=14425698;SVTYPE=DEL;SVLEN=-270;CIGAR=1M14I270D	GT:FT:GQ:PL:PR:SR	1/1:PASS:95:999,98,0:0,17:0,36	Deletion	Homozygous	P0_N2_treated_hermaphrodite	14425698	I	0	0	0	0	0	rep.3	49230678			0
144217	II	1454792	MantaDEL:506:0:0:0:1:0	CCGGTTCTATTTTTTCCGTGAGTAGATTTTTCCGCCGGTTCAATTATTCCGCCGGTTCGAGTTTTTCCGCAGATAGATTTTTTCCGCCGGTTCAATTTTTTCCGCCGGTTCTATTTTTTCCGTGAGTAGATTTTTCCGCCGGTTCAATTATTCCGCCGGTTCGAGTTTTTCCGCAGATAGATTTTTTCCGCCGGTTCAA	CAGATATAT	252	PASS	END=1454990;SVTYPE=DEL;SVLEN=-198;CIGAR=1M8I198D	GT:FT:GQ:PL:PR:SR	0/1:PASS:252:302,0,494:9,0:40,14	Deletion	Heterozygous	P0_N2_treated_hermaphrodite	1454990	II	0	0	0	0	0	rep.3	49230678			0
144217	II	1454792	MantaDEL:449:5:5:0:0:0	CCGGTTCTATTTTTTCCGTGAGTAGATTTTTCCGCCGGTTCAATTATTCCGCCGGTTCGAGTTTTTCCGCAGATAGATTTTTTCCGCCGGTTCAATTTTTTCCGCCGGTTCTATTTTTTCCGTGAGTAGATTTTTCCGCCGGTTCAATTATTCCGCCGGTTCGAGTTTTTCCGCAGATAGATTTTTTCCGCCGGTTCAATTTTTCCGCCGGTTCG	CAGATAT	256	PASS	END=1455006;SVTYPE=DEL;SVLEN=-214;CIGAR=1M6I214D	GT:FT:GQ:PL:PR:SR	0/1:PASS:256:306,0,538:6,0:45,13	Deletion	Heterozygous	P0_N2_treated_hermaphrodite	1455006	II	0	0	0	0	0	rep.3	49230678			0
144217	II	1455374	MantaBND:449:3:4:0:0:0:0	C	CGAAA]II:1456629]	584	PASS	SVTYPE=BND;MATEID=MantaBND:449:3:4:0:0:0:1;SVINSLEN=4;SVINSSEQ=GAAA;BND_DEPTH=88;MATE_BND_DEPTH=111	GT:FT:GQ:PL:PR:SR	0/1:PASS:584:634,0,999:49,3:84,23	Translocation	Heterozygous	P0_N2_treated_hermaphrodite	1456629	II	0	0	0	0	0	rep.3	49230678	2	GAAA	0
144217	II	1456629	MantaBND:449:3:4:0:0:0:1	A	ATTTC]II:1455374]	584	PASS	SVTYPE=BND;MATEID=MantaBND:449:3:4:0:0:0:0;SVINSLEN=4;SVINSSEQ=TTTC;BND_DEPTH=111;MATE_BND_DEPTH=88	GT:FT:GQ:PL:PR:SR	0/1:PASS:584:634,0,999:49,3:84,23	Translocation	Heterozygous	P0_N2_treated_hermaphrodite	1455374	II	0	0	0	0	0	rep.3	49230678	2	TTTC	0
144217	II	1659341	MantaBND:451:0:1:1:0:0:0	A	]X:8651745]A	633	PASS	SVTYPE=BND;MATEID=MantaBND:451:0:1:1:0:0:1;IMPRECISE;CIPOS=-165,165;EVENT=MantaBND:451:0:1:0:0:0:0;JUNCTION_QUAL=47;BND_DEPTH=46;MATE_BND_DEPTH=55	GT:FT:GQ:PL:PR	0/1:PASS:633:683,0,809:16,8	Translocation	Heterozygous	P0_N2_treated_hermaphrodite	8651745	X	0	-165	165	0	0	rep.3	49230678	3		165	x	LONGPAL3
144217	II	1659672	MantaBND:451:0:2:0:0:0:0	A	A[IV:4198380[	54	PASS	SVTYPE=BND;MATEID=MantaBND:451:0:2:0:0:0:1;IMPRECISE;CIPOS=-164,164;BND_DEPTH=90;MATE_BND_DEPTH=44	GT:FT:GQ:PL:PR	0/1:PASS:54:104,0,489:33,11	Translocation	Heterozygous	P0_N2_treated_hermaphrodite	4198380	IV	0	-164	164	0	0	rep.3	49230678	1		164	x	CELE6	LONGPAL3
144217	II	1659790	MantaBND:451:0:1:0:0:0:0	A	A[X:8651737[	633	PASS	SVTYPE=BND;MATEID=MantaBND:451:0:1:0:0:0:1;CIPOS=0,9;HOMLEN=9;HOMSEQ=GCATAGGCC;EVENT=MantaBND:451:0:1:0:0:0:0;JUNCTION_QUAL=536;BND_DEPTH=58;MATE_BND_DEPTH=55	GT:FT:GQ:PL:PR:SR	0/1:PASS:633:683,0,809:28,6:33,13	Translocation	Heterozygous	P0_N2_treated_hermaphrodite	8651737	X	9	0	9	0	0	rep.3	49230678	1		9	x
144217	II	2141116	MantaBND:468:0:3:0:0:0:1	A	A[V:686153[	999	PASS	SVTYPE=BND;MATEID=MantaBND:468:0:3:0:0:0:0;CIPOS=0,12;HOMLEN=12;HOMSEQ=TTAACAAGGAAA;BND_DEPTH=96;MATE_BND_DEPTH=129	GT:FT:GQ:PL:PR:SR	0/1:PASS:429:999,0,426:19,15:26,47	Translocation	Heterozygous	P0_N2_treated_hermaphrodite	686153	V	12	0	12	0	0	rep.3	49230678	1		12	x
144217	II	2818716	MantaINS:496:0:0:0:0:0	A	AGCGCTCAAAGATTGGGCGCGAGAGAGCGCGGGGAAGGGGAGACGCAGAGCGCCTCGCGCGCCTGCGTCTCCCCTTCCACCGCACTCTCTC	899	PASS	END=2818716;SVTYPE=INS;SVLEN=90;CIGAR=1M90I;CIPOS=0,4;HOMLEN=4;HOMSEQ=GCGC	GT:FT:GQ:PL:PR:SR	1/1:PASS:45:952,48,0:0,0:1,31	Insertion	Homozygous	P0_N2_treated_hermaphrodite	2818716	II	4	0	4	0	0	rep.3	49230678			4
144217	II	2897567	MantaDUP:TANDEM:489:0:1:0:0:0	G	<DUP:TANDEM>	598	PASS	END=2898963;SVTYPE=DUP;SVLEN=1396;CIPOS=0,24;CIEND=0,24;HOMLEN=24;HOMSEQ=TAGTCCTAAAATTGTGATTTTTAG	GT:FT:GQ:PL:PR:SR	0/1:PASS:497:648,0,494:16,18:38,22	Tandem Duplication	Heterozygous	P0_N2_treated_hermaphrodite	2898963	II	24	0	24	0	24	rep.3	49230678			24
144217	II	2898645	MantaDEL:489:1:1:3:0:0	TTTAGTCCAAAAATTGAGGTTTGTAGTCCTAAAATTGTGATTTTTAGTCCAAAAATTGAGATTTATAGTCCTAAAATTGAGGCTTTTAGTCCAAAAATTGAGGCTTT	TA	495	PASS	END=2898751;SVTYPE=DEL;SVLEN=-106;CIGAR=1M1I106D	GT:FT:GQ:PL:PR:SR	0/1:PASS:495:545,0,997:20,0:85,30	Deletion	Heterozygous	P0_N2_treated_hermaphrodite	2898751	II	0	0	0	0	0	rep.3	49230678			0
144217	II	3833797	MantaINS:529:0:0:0:0:1	ACG	ATGGCTAGTTTAGGGGTGACAGGCAAACGATTTTTTCCGGCAAATCAGCAAACCGGCAATTTGCCGAATTTGCCGGAAAAAACTCAATTGCCGTCCACTCCTGTGATAGTGGATGGTTGT	999	PASS	END=3833799;SVTYPE=INS;SVLEN=119;CIGAR=1M119I2D	GT:FT:GQ:PL:PR:SR	0/1:PASS:296:999,0,293:0,7:27,34	Insertion	Heterozygous	P0_N2_treated_hermaphrodite	3833799	II	0	0	0	0	0	rep.3	49230678			0
144217	II	3834811	MantaDEL:523:0:0:0:0:0	TGCATAAATGGGCATAAATGGGCCAATGAAAAGCATAAATGGGCCAATGAAT	TAAGATATAG	999	PASS	END=3834862;SVTYPE=DEL;SVLEN=-51;CIGAR=1M9I51D	GT:FT:GQ:PL:PR:SR	0/1:PASS:503:999,0,500:8,0:40,40	Deletion	Heterozygous	P0_N2_treated_hermaphrodite	3834862	II	0	0	0	0	0	rep.3	49230678			0
144217	II	4309134	MantaBND:517:2:8:0:0:0:0	A	A[IV:13463713[	999	PASS	SVTYPE=BND;MATEID=MantaBND:517:2:8:0:0:0:1;CIPOS=0,19;HOMLEN=19;HOMSEQ=TATTTATTTATTTAATTAA;BND_DEPTH=116;MATE_BND_DEPTH=118	GT:FT:GQ:PL:PR:SR	0/1:PASS:731:999,0,728:10,5:67,59	Translocation	Heterozygous	P0_N2_treated_hermaphrodite	13463713	IV	19	0	19	0	0	rep.3	49230678	1		19			HelitronY1_CE
144217	II	6163864	MantaDEL:582:0:1:0:0:0	G	<DEL>	107	PASS	END=6166863;SVTYPE=DEL;SVLEN=-2999;CIPOS=0,2;CIEND=0,2;HOMLEN=2;HOMSEQ=TC	GT:FT:GQ:PL:PR:SR	0/1:PASS:107:157,0,871:28,6:63,17	Deletion	Heterozygous	P0_N2_treated_hermaphrodite	6166863	II	2	0	2	0	2	rep.3	49230678			2
144217	II	6187757	MantaBND:589:0:2:0:0:0:0	A	[X:16884759[A	999	PASS	SVTYPE=BND;MATEID=MantaBND:589:0:2:0:0:0:1;CIPOS=0,7;HOMLEN=7;HOMSEQ=TCCCGAC;BND_DEPTH=143;MATE_BND_DEPTH=150	GT:FT:GQ:PL:PR:SR	0/1:PASS:538:999,0,535:31,8:38,39	Translocation	Heterozygous	P0_N2_treated_hermaphrodite	16884759	X	7	0	7	0	0	rep.3	49230678	4		7	x	(TCCCGATCCA)n	(CGGGATGGAT)n
144217	II	6630113	MantaDUP:TANDEM:599:0:0:0:0:0	C	<DUP:TANDEM>	999	PASS	END=6630883;SVTYPE=DUP;SVLEN=770	GT:FT:GQ:PL:PR:SR	0/1:PASS:999:999,0,999:35,25:75,30	Tandem Duplication	Heterozygous	P0_N2_treated_hermaphrodite	6630883	II	0	0	0	0	0	rep.3	49230678			0
144217	II	6669184	MantaINS:603:0:0:0:4:0	T	<INS>	999	PASS	END=6669184;SVTYPE=INS;CIPOS=0,6;CIEND=0,6;HOMLEN=6;HOMSEQ=CATTTC;LEFT_SVINSSEQ=CATTTCCGATGCATTTAATATTATTCCGAATAATACCAGAGTTGGACCACCAGGATTTGTTATCCTGATTGCAAATTCGTGAGTGTTCGCCATGATCACTGTTTCAGAAATTCAATTTTCAGCGCTGATTCGGTTCCAACTTCTGTGAATTCCGCTGTGAATTTGAAAGCTCAAGGGTTTGAAATTGTCACAGTTGGATTTAAATCAGCTGGAGATTTTACCTCGTTGTCATCACAGCCTGGTTTCAACTTCAAAATTCATCAGGACGGTGATATGAGTTCTGTTGCTGCATTGATTGGAAATGTTTTGAG;RIGHT_S…	GT:FT:GQ:PL:PR:SR	1/1:PASS:231:999,234,0:0,1:0,86	Insertion	Homozygous	P0_N2_treated_hermaphrodite	6669184	II	6	0	6	0	6	rep.3	49230678			6
144217	II	7801507	MantaDEL:629:0:0:0:0:0	ATAAGACAATGCCAAAGTGATAACTTTCCTGAAGGCACATTTACTTCGCCTAATTTTTGATTTTTAAAACAAATAAATATTTACATTTTCTAATATTGATC	A	583	PASS	END=7801607;SVTYPE=DEL;SVLEN=-100;CIGAR=1M100D;CIPOS=0,100;HOMLEN=100;HOMSEQ=TAAGACAATGCCAAAGTGATAACTTTCCTGAAGGCACATTTACTTCGCCTAATTTTTGATTTTTAAAACAAATAAATATTTACATTTTCTAATATTGATC	GT:FT:GQ:PL:PR:SR	1/1:PASS:36:636,39,0:0,0:0,14	Deletion	Homozygous	P0_N2_treated_hermaphrodite	7801607	II	100	0	100	0	0	rep.3	49230678			100
144217	II	11704655	MantaINS:720:0:0:0:0:0	G	GTTTTTTCAAATGTGCCTCCGTGGAGAAAACCATCTGAAATGTTAAAAAAATTATGTTTTT	999	PASS	END=11704655;SVTYPE=INS;SVLEN=60;CIGAR=1M60I;CIPOS=0,9;HOMLEN=9;HOMSEQ=TTTTTTCAA	GT:FT:GQ:PL:PR:SR	1/1:PASS:132:999,135,0:0,0:0,59	Insertion	Homozygous	P0_N2_treated_hermaphrodite	11704655	II	9	0	9	0	0	rep.3	49230678			9
144217	II	13583084	MantaDUP:TANDEM:791:0:1:0:0:0	C	<DUP:TANDEM>	712	PASS	END=13583647;SVTYPE=DUP;SVLEN=563;SVINSLEN=1;SVINSSEQ=T	GT:FT:GQ:PL:PR:SR	0/1:PASS:712:762,0,792:32,14:47,20	Tandem Duplication	Heterozygous	P0_N2_treated_hermaphrodite	13583647	II	0	0	0	0	0	rep.3	49230678			0
144217	II	15049162	MantaBND:831:0:0:1:0:0:0	T	[II:15049584[T	999	PASS	SVTYPE=BND;MATEID=MantaBND:831:0:0:1:0:0:1;CIPOS=0,14;HOMLEN=14;HOMSEQ=TAGACAACTTTTTA;BND_DEPTH=63;MATE_BND_DEPTH=91	GT:FT:GQ:PL:PR:SR	0/1:PASS:492:999,0,489:20,12:38,39	Translocation	Heterozygous	P0_N2_treated_hermaphrodite	15049584	II	14	0	14	0	0	rep.3	49230678	4		14
144217	II	15049557	MantaBND:831:0:1:0:0:0:0	T	T]II:15050142]	984	PASS	SVTYPE=BND;MATEID=MantaBND:831:0:1:0:0:0:1;CIPOS=0,2;HOMLEN=2;HOMSEQ=TT;BND_DEPTH=91;MATE_BND_DEPTH=73	GT:FT:GQ:PL:PR:SR	0/1:PASS:731:999,0,728:28,10:49,24	Translocation	Heterozygous	P0_N2_treated_hermaphrodite	15050142	II	2	0	2	0	0	rep.3	49230678	2		2	x		LONGPAL3
144217	II	15049570	MantaBND:831:0:0:1:0:0:1	A	[II:15049176[A	999	PASS	SVTYPE=BND;MATEID=MantaBND:831:0:0:1:0:0:0;CIPOS=0,14;HOMLEN=14;HOMSEQ=AAAAGTTGTCTAAT;BND_DEPTH=91;MATE_BND_DEPTH=63	GT:FT:GQ:PL:PR:SR	0/1:PASS:492:999,0,489:20,12:38,39	Translocation	Heterozygous	P0_N2_treated_hermaphrodite	15049176	II	14	0	14	0	0	rep.3	49230678	4		14
144217	II	15050140	MantaBND:831:0:1:0:0:0:1	A	A]II:15049559]	984	PASS	SVTYPE=BND;MATEID=MantaBND:831:0:1:0:0:0:0;CIPOS=0,2;HOMLEN=2;HOMSEQ=AA;BND_DEPTH=73;MATE_BND_DEPTH=91	GT:FT:GQ:PL:PR:SR	0/1:PASS:731:999,0,728:28,10:49,24	Translocation	Heterozygous	P0_N2_treated_hermaphrodite	15049559	II	2	0	2	0	0	rep.3	49230678	2		2	x	LONGPAL3
144217	III	56275	MantaBND:354:12:13:0:0:0:1	T	T]X:15750413]	999	PASS	SVTYPE=BND;MATEID=MantaBND:354:12:13:0:0:0:0;CIPOS=0,21;HOMLEN=21;HOMSEQ=TGAAAACTTACCATAATTTTT;BND_DEPTH=66;MATE_BND_DEPTH=56	GT:FT:GQ:PL:PR:SR	0/1:PASS:270:999,0,267:21,5:16,33	Translocation	Heterozygous	P0_N2_treated_hermaphrodite	15750413	X	21	0	21	0	0	rep.3	49230678	2		21		TC4
144217	III	468056	MantaBND:55:0:1:0:0:0:0	G	G[I:2002703[	880	PASS	SVTYPE=BND;MATEID=MantaBND:55:0:1:0:0:0:1;BND_DEPTH=109;MATE_BND_DEPTH=71	GT:FT:GQ:PL:PR:SR	0/1:PASS:880:930,0,999:60,7:90,24	Translocation	Heterozygous	P0_N2_treated_hermaphrodite	2002703	I	0	0	0	0	0	rep.3	49230678	1		0	x	CEMUDR1	PAL5A_CE
144217	III	490764	MantaBND:842:1:7:0:0:0:1	T	[III:492762[T	55	PASS	SVTYPE=BND;MATEID=MantaBND:842:1:7:0:0:0:0;IMPRECISE;CIPOS=-281,282;BND_DEPTH=97;MATE_BND_DEPTH=49	GT:FT:GQ:PL:PR	0/1:PASS:55:105,0,462:31,10	Translocation	Heterozygous	P0_N2_treated_hermaphrodite	492762	III	0	-281	282	0	0	rep.3	49230678	4		282		CELE2
144217	III	492762	MantaBND:842:1:7:0:0:0:0	A	[III:490764[A	55	PASS	SVTYPE=BND;MATEID=MantaBND:842:1:7:0:0:0:1;IMPRECISE;CIPOS=-116,117;BND_DEPTH=49;MATE_BND_DEPTH=97	GT:FT:GQ:PL:PR	0/1:PASS:55:105,0,462:31,10	Translocation	Heterozygous	P0_N2_treated_hermaphrodite	490764	III	0	-116	117	0	0	rep.3	49230678	4		117
144217	III	498451	MantaDUP:TANDEM:842:6:8:0:0:0	A	<DUP:TANDEM>	955	PASS	END=498982;SVTYPE=DUP;SVLEN=531;CIPOS=0,13;CIEND=0,13;HOMLEN=13;HOMSEQ=TATTTAGCATACC	GT:FT:GQ:PL:PR:SR	0/1:PASS:955:999,0,999:39,2:92,35	Tandem Duplication	Heterozygous	P0_N2_treated_hermaphrodite	498982	III	13	0	13	0	13	rep.3	49230678			13
144217	III	578314	MantaDUP:TANDEM:850:0:1:0:1:0	A	<DUP:TANDEM>	41	PASS	END=578701;SVTYPE=DUP;SVLEN=387;CIPOS=0,37;CIEND=0,37;HOMLEN=37;HOMSEQ=TTAGCAGACCCAAGTATGGTCTGCTAAATATTTAGCA	GT:FT:GQ:PL:PR:SR	0/1:PASS:41:91,0,730:28,2:43,6	Tandem Duplication	Heterozygous	P0_N2_treated_hermaphrodite	578701	III	37	0	37	0	37	rep.3	49230678			37
144217	III	2261463	MantaINS:12:1:1:0:0:0	T	TAAAAATGGGGAATTAGAGTGCGAAGTTAAAGGTGGAGTAGCGTCAGTGTGGA	999	PASS	END=2261463;SVTYPE=INS;SVLEN=52;CIGAR=1M52I;CIPOS=0,2;HOMLEN=2;HOMSEQ=AA	GT:FT:GQ:PL:PR:SR	1/1:PASS:153:999,156,0:0,0:0,59	Insertion	Homozygous	P0_N2_treated_hermaphrodite	2261463	III	2	0	2	0	0	rep.3	49230678			2
144217	III	2893360	MantaINS:904:0:0:0:3:0	A	<INS>	999	PASS	END=2893360;SVTYPE=INS;CIPOS=0,4;CIEND=0,4;HOMLEN=4;HOMSEQ=GATC;LEFT_SVINSSEQ=GATCAGAAAACATAGAGACGGGGCGTTTGAAAGTTCAAAAAACGTAACTAGAAAAATTTTAAAAATTAAAAAAAAAACGATTTTGAGGGAATTTTTGGCCAACTTTCTAAAAATTTAATTAGTAATTCTATATAAATTCCAGAAAAAAAATTGACGATGAGGAAATG;RIGHT_SVINSSEQ=ACTAATAGTAAATTCCAATGGATTTTTTATTTTCCCCGTGACAAACCAACATGAACTTGTTATCCTTATCTACGTGTTTAATCTGTCCTCAGAATCAGAATCAAAATCAGTCTTCGATTTGGAATCGACAAGT	GT:FT:GQ:PL:PR:SR	1/1:PASS:133:999,136,0:0,3:0,51	Insertion	Homozygous	P0_N2_treated_hermaphrodite	2893360	III	4	0	4	0	4	rep.3	49230678			4
144217	III	4670559	MantaBND:921:1:4:0:0:0:0	C	C[IV:16571333[	240	PASS	SVTYPE=BND;MATEID=MantaBND:921:1:4:0:0:0:1;CIPOS=0,61;HOMLEN=61;HOMSEQ=CTAGGGCTGTGCAACCGGACGTCCGGTTTTTTCGGACGTCCGAAAAACCGGACGCCGGACG;BND_DEPTH=50;MATE_BND_DEPTH=74	GT:FT:GQ:PL:PR:SR	0/1:PASS:112:290,0,109:6,3:6,9	Translocation	Heterozygous	P0_N2_treated_hermaphrodite	16571333	IV	61	0	61	0	0	rep.3	49230678	1		61		CELE4
144217	III	4670588	MantaBND:921:1:2:2:1:0:0	T	]V:20705450]T	863	PASS	SVTYPE=BND;MATEID=MantaBND:921:1:2:2:1:0:1;BND_DEPTH=50;MATE_BND_DEPTH=129	GT:FT:GQ:PL:PR:SR	0/1:PASS:451:913,0,448:2,5:44,21	Translocation	Heterozygous	P0_N2_treated_hermaphrodite	20705450	V	0	0	0	0	0	rep.3	49230678	3		0	x
144217	III	9101376	MantaBND:1084:0:0:0:0:0:0	A	A]III:9101498]	198	PASS	SVTYPE=BND;MATEID=MantaBND:1084:0:0:0:0:0:1;IMPRECISE;CIPOS=-324,325;BND_DEPTH=72;MATE_BND_DEPTH=76	GT:FT:GQ:PL:PR	0/1:PASS:198:248,0,462:33,18	Translocation	Heterozygous	P0_N2_treated_hermaphrodite	9101498	III	0	-324	325	0	0	rep.3	49230678	2		325	x
144217	III	9101498	MantaBND:1084:0:0:0:0:0:1	T	T]III:9101376]	198	PASS	SVTYPE=BND;MATEID=MantaBND:1084:0:0:0:0:0:0;IMPRECISE;CIPOS=-224,224;BND_DEPTH=76;MATE_BND_DEPTH=72	GT:FT:GQ:PL:PR	0/1:PASS:198:248,0,462:33,18	Translocation	Heterozygous	P0_N2_treated_hermaphrodite	9101376	III	0	-224	224	0	0	rep.3	49230678	2		224	x
144217	III	10226056	MantaINS:1100:0:0:0:0:0	A	AAAAACTAAAAATAAAACTAAAAATAAAACTAAAACTAAAAATAAAACTAAAAATAAAACTAAAAATAAAACT	999	PASS	END=10226056;SVTYPE=INS;SVLEN=72;CIGAR=1M72I;CIPOS=0,54;HOMLEN=54;HOMSEQ=AAAACTAAAAATAAAACTAAAAATAAAACTAAAACTAAAAATAAAACTAAAAAT	GT:FT:GQ:PL:PR:SR	1/1:PASS:113:999,116,0:0,0:0,44	Insertion	Homozygous	P0_N2_treated_hermaphrodite	10226056	III	54	0	54	0	0	rep.3	49230678			54
144217	III	10557581	MantaINS:449:8:8:0:0:0	A	ACCGCAAGTAGATTCTTTCCGCCGGTTCGAAATTTTCCGCAAGTAGATTTTTCCGCCGGTAGATTTTTCCGGTGGTAGATTCTTTCCGCCGGTTCGAGTTTTT	999	PASS	END=10557581;SVTYPE=INS;SVLEN=102;CIGAR=1M102I;CIPOS=0,36;HOMLEN=36;HOMSEQ=CCGCAAGTAGATTCTTTCCGCCGGTTCGAAATTTTC	GT:FT:GQ:PL:PR:SR	1/1:PASS:130:999,133,0:0,2:0,57	Insertion	Homozygous	P0_N2_treated_hermaphrodite	10557581	III	36	0	36	0	0	rep.3	49230678			36
144217	III	11114137	MantaBND:1129:0:1:0:0:0:1	C	[V:17040262[C	224	PASS	SVTYPE=BND;MATEID=MantaBND:1129:0:1:0:0:0:0;CIPOS=0,5;HOMLEN=5;HOMSEQ=CCCCT;BND_DEPTH=37;MATE_BND_DEPTH=39	GT:FT:GQ:PL:PR:SR	0/1:PASS:224:274,0,335:14,5:18,5	Translocation	Heterozygous	P0_N2_treated_hermaphrodite	17040262	V	5	0	5	0	0	rep.3	49230678	4		5	x
144217	III	11114378	MantaBND:1129:2:3:0:0:0:1	T	T[V:306874[	537	PASS	SVTYPE=BND;MATEID=MantaBND:1129:2:3:0:0:0:0;CIPOS=0,29;HOMLEN=29;HOMSEQ=TCGCTTTTTTCACGGCCACCTCTTCCATT;BND_DEPTH=57;MATE_BND_DEPTH=16	GT:FT:GQ:PL:PR:SR	0/1:PASS:103:587,0,100:1,5:15,15	Translocation	Heterozygous	P0_N2_treated_hermaphrodite	306874	V	29	0	29	0	0	rep.3	49230678	1		29
144217	III	11114378	MantaBND:1129:1:2:0:0:0:0	T	T]V:17040204]	205	PASS	SVTYPE=BND;MATEID=MantaBND:1129:1:2:0:0:0:1;CIPOS=0,59;HOMLEN=59;HOMSEQ=TCGCTTTTTTCACGGCCACCTCTTCCATTTGAAAACAGGGGGGAAATTAGAAACCCGTG;BND_DEPTH=57;MATE_BND_DEPTH=27	GT:FT:GQ:PL:PR:SR	0/1:PASS:117:255,0,114:8,4:6,5	Translocation	Heterozygous	P0_N2_treated_hermaphrodite	17040204	V	59	0	59	0	0	rep.3	49230678	2		59	x		LINE2F_CE
144217	III	12376544	MantaDUP:TANDEM:1165:0:0:2:0:0	C	<DUP:TANDEM>	180	PASS	END=12376674;SVTYPE=DUP;SVLEN=130;CIPOS=0,14;CIEND=0,14;HOMLEN=14;HOMSEQ=TAAAATTTCAAACG	GT:FT:GQ:PL:PR:SR	0/1:PASS:180:230,0,331:8,0:31,11	Tandem Duplication	Heterozygous	P0_N2_treated_hermaphrodite	12376674	III	14	0	14	0	14	rep.3	49230678			14
144217	III	12376545	MantaBND:1165:0:1:0:0:0:1	T	[III:12627387[T	882	PASS	SVTYPE=BND;MATEID=MantaBND:1165:0:1:0:0:0:0;CIPOS=0,20;HOMLEN=20;HOMSEQ=AAAATTTCAAACGAAAATTC;BND_DEPTH=39;MATE_BND_DEPTH=74	GT:FT:GQ:PL:PR:SR	0/1:PASS:378:932,0,375:18,4:27,23	Translocation	Heterozygous	P0_N2_treated_hermaphrodite	12627387	III	20	0	20	0	0	rep.3	49230678	4		20	x
144217	III	12627367	MantaBND:1165:0:1:0:0:0:0	A	[III:12376565[A	882	PASS	SVTYPE=BND;MATEID=MantaBND:1165:0:1:0:0:0:1;CIPOS=0,20;HOMLEN=20;HOMSEQ=ATTTTCGTTTGAAATTTTAA;BND_DEPTH=74;MATE_BND_DEPTH=39	GT:FT:GQ:PL:PR:SR	0/1:PASS:378:932,0,375:18,4:27,23	Translocation	Heterozygous	P0_N2_treated_hermaphrodite	12376565	III	20	0	20	0	0	rep.3	49230678	4		20	x
144217	IV	1312645	MantaBND:1245:2:4:0:0:0:0	G	G]X:216896]	999	PASS	SVTYPE=BND;MATEID=MantaBND:1245:2:4:0:0:0:1;CIPOS=0,8;HOMLEN=8;HOMSEQ=AGATCAAC;BND_DEPTH=66;MATE_BND_DEPTH=32	GT:FT:GQ:PL:PR:SR	0/1:PASS:367:999,0,364:14,6:22,28	Translocation	Heterozygous	P0_N2_treated_hermaphrodite	216896	X	8	0	8	0	0	rep.3	49230678	2		8	x
144217	IV	2025953	MantaBND:1267:0:3:0:0:0:0	T	[IV:2029796[T	43	PASS	SVTYPE=BND;MATEID=MantaBND:1267:0:3:0:0:0:1;IMPRECISE;CIPOS=-350,351;BND_DEPTH=68;MATE_BND_DEPTH=56	GT:FT:GQ:PL:PR	0/1:PASS:43:93,0,287:20,9	Translocation	Heterozygous	P0_N2_treated_hermaphrodite	2029796	IV	0	-350	351	0	0	rep.3	49230678	4		351			PALTTAA2_CE
144217	IV	2029796	MantaBND:1267:0:3:0:0:0:1	A	[IV:2025953[A	43	PASS	SVTYPE=BND;MATEID=MantaBND:1267:0:3:0:0:0:0;IMPRECISE;CIPOS=-172,172;BND_DEPTH=56;MATE_BND_DEPTH=68	GT:FT:GQ:PL:PR	0/1:PASS:43:93,0,287:20,9	Translocation	Heterozygous	P0_N2_treated_hermaphrodite	2025953	IV	0	-172	172	0	0	rep.3	49230678	4		172		PALTTAA2_CE
144217	IV	2380075	MantaBND:908:1:5:0:2:0:1	T	]X:5445]T	762	PASS	SVTYPE=BND;MATEID=MantaBND:908:1:5:0:2:0:0;CIPOS=0,26;HOMLEN=26;HOMSEQ=TTAGGGTCTCGCCGCGAAATTCAGCT;BND_DEPTH=65;MATE_BND_DEPTH=129	GT:FT:GQ:PL:PR:SR	0/1:PASS:762:812,0,999:40,4:73,29	Translocation	Heterozygous	P0_N2_treated_hermaphrodite	5445	X	26	0	26	0	0	rep.3	49230678	3		26	x		PALTTAA2_CE
144217	IV	4198380	MantaBND:451:0:2:0:0:0:1	T	]II:1659672]T	54	PASS	SVTYPE=BND;MATEID=MantaBND:451:0:2:0:0:0:0;IMPRECISE;CIPOS=-122,123;BND_DEPTH=44;MATE_BND_DEPTH=90	GT:FT:GQ:PL:PR	0/1:PASS:54:104,0,489:33,11	Translocation	Heterozygous	P0_N2_treated_hermaphrodite	1659672	II	0	-122	123	0	0	rep.3	49230678	3		123	x	LONGPAL3
144217	IV	4816396	MantaBND:1329:0:1:0:1:0:1	A	ATCGACT[V:9724732[	837	PASS	SVTYPE=BND;MATEID=MantaBND:1329:0:1:0:1:0:0;SVINSLEN=6;SVINSSEQ=TCGACT;BND_DEPTH=100;MATE_BND_DEPTH=78	GT:FT:GQ:PL:PR:SR	0/1:PASS:629:887,0,626:25,17:34,24	Translocation	Heterozygous	P0_N2_treated_hermaphrodite	9724732	V	0	0	0	0	0	rep.3	49230678	1	TCGACT	0	x	IR3_CE	CELE14B
144217	IV	4816470	MantaBND:1329:0:1:1:0:0:0	G	G]V:9724752]	138	PASS	SVTYPE=BND;MATEID=MantaBND:1329:0:1:1:0:0:1;IMPRECISE;CIPOS=-187,188;BND_DEPTH=52;MATE_BND_DEPTH=78	GT:FT:GQ:PL:PR	0/1:PASS:138:188,0,402:28,14	Translocation	Heterozygous	P0_N2_treated_hermaphrodite	9724752	V	0	-187	188	0	0	rep.3	49230678	2		188	x	IR3_CE	CELE14B
144217	IV	5950124	MantaINS:148:3:3:0:2:0	T	<INS>	816	PASS	END=5950124;SVTYPE=INS;CIPOS=0,9;CIEND=0,9;HOMLEN=9;HOMSEQ=ACCGGACGC;LEFT_SVINSSEQ=ACCGGACGCACTGCGTCCGGTTTTGGGGTAGGTTTCCACGGCGGCCGACAATTTCCGAGTTTCGCCACTCACTATAGTTAATCAGCAATTTTATAG;RIGHT_SVINSSEQ=CACTATAGTTAATCAGCAATTTTATAGTGAGTGGCGAAACTCGGAAATTGTCGGCCGTCGTGGATAGCTACCTCCA	GT:FT:GQ:PL:PR:SR	1/1:PASS:62:869,65,0:0,9:0,13	Insertion	Homozygous	P0_N2_treated_hermaphrodite	5950124	IV	9	0	9	0	9	rep.3	49230678			9
144217	IV	6006461	MantaBND:2:0:2:0:0:0:1	C	C[I:229115[	90	PASS	SVTYPE=BND;MATEID=MantaBND:2:0:2:0:0:0:0;IMPRECISE;CIPOS=-144,144;BND_DEPTH=53;MATE_BND_DEPTH=94	GT:FT:GQ:PL:PR	0/1:PASS:90:140,0,912:61,16	Translocation	Heterozygous	P0_N2_treated_hermaphrodite	229115	I	0	-144	144	0	0	rep.3	49230678	1		144
144217	IV	6320432	MantaBND:1366:0:1:0:0:0:1	T	]V:4914049]TGT	999	PASS	SVTYPE=BND;MATEID=MantaBND:1366:0:1:0:0:0:0;SVINSLEN=2;SVINSSEQ=TG;BND_DEPTH=71;MATE_BND_DEPTH=63	GT:FT:GQ:PL:PR:SR	0/1:PASS:213:999,0,210:12,22:18,30	Translocation	Heterozygous	P0_N2_treated_hermaphrodite	4914049	V	0	0	0	0	0	rep.3	49230678	3	TG	0	x	PALTA3_CE
144217	IV	6470041	MantaBND:157:0:3:1:0:0:1	T	T[I:4548929[	55	PASS	SVTYPE=BND;MATEID=MantaBND:157:0:3:1:0:0:0;IMPRECISE;CIPOS=-119,120;BND_DEPTH=57;MATE_BND_DEPTH=99	GT:FT:GQ:PL:PR	0/1:PASS:55:105,0,518:35,11	Translocation	Heterozygous	P0_N2_treated_hermaphrodite	4548929	I	0	-119	120	0	0	rep.3	49230678	1		120	x		(TTTTAA)n
144217	IV	7485251	MantaINS:1397:0:0:0:4:0	A	<INS>	999	PASS	END=7485251;SVTYPE=INS;CIPOS=0,10;CIEND=0,10;HOMLEN=10;HOMSEQ=GGATCCGAAA;LEFT_SVINSSEQ=GGATCCGAAAAGTATCGAACAAGTGATGACACGTCTACAAATTAGCAAACAATGGAATACACTTCGTGCTCTACTCAACTATGTTCGTTCGAATCAAATGGATTCCATGATCCGCTCGTTCCCGCTTATTTGGTTCCGTGTTTATGAAAATGCCTTGATTGAATTGAATGGTGGATCCATGGCGAATCCAGATTGGAATTACGAACAATGCGTTATGC;RIGHT_SVINSSEQ=GATTATTTCTGTCCTTTCTAACTGGACTATTGATGTAAGTTCAATTTAAACAATATTTATAATCATTTAATTTACCAA…	GT:FT:GQ:PL:PR:SR	1/1:PASS:171:999,174,0:0,3:0,66	Insertion	Homozygous	P0_N2_treated_hermaphrodite	7485251	IV	10	0	10	0	10	rep.3	49230678			10
144217	IV	8566417	MantaBND:15:1:2:0:0:0:1	A	]I:8054335]A	517	PASS	SVTYPE=BND;MATEID=MantaBND:15:1:2:0:0:0:0;CIPOS=0,37;HOMLEN=37;HOMSEQ=CTCGGCATTTGGCTCTAGCTTCTTGCCCAAGTTTAGC;BND_DEPTH=75;MATE_BND_DEPTH=49	GT:FT:GQ:PL:PR:SR	0/1:PASS:382:567,0,379:11,4:25,16	Translocation	Heterozygous	P0_N2_treated_hermaphrodite	8054335	I	37	0	37	0	0	rep.3	49230678	3		37	x
144217	IV	9852302	MantaDUP:TANDEM:1471:0:1:0:0:0	T	<DUP:TANDEM>	428	PASS	END=9852492;SVTYPE=DUP;SVLEN=190;CIPOS=0,4;CIEND=0,4;HOMLEN=4;HOMSEQ=AAAT	GT:FT:GQ:PL:PR:SR	0/1:PASS:428:478,0,999:37,3:91,35	Tandem Duplication	Heterozygous	P0_N2_treated_hermaphrodite	9852492	IV	4	0	4	0	4	rep.3	49230678			4
144217	IV	10350537	MantaBND:1486:0:0:2:1:0:1	A	[IV:10350682[A	650	PASS	SVTYPE=BND;MATEID=MantaBND:1486:0:0:2:1:0:0;BND_DEPTH=109;MATE_BND_DEPTH=124	GT:FT:GQ:PL:PR:SR	0/1:PASS:650:700,0,999:41,9:94,24	Translocation	Heterozygous	P0_N2_treated_hermaphrodite	10350682	IV	0	0	0	0	0	rep.3	49230678	4		0	x
144217	IV	10350682	MantaBND:1486:0:0:2:1:0:0	A	[IV:10350537[A	650	PASS	SVTYPE=BND;MATEID=MantaBND:1486:0:0:2:1:0:1;BND_DEPTH=124;MATE_BND_DEPTH=109	GT:FT:GQ:PL:PR:SR	0/1:PASS:650:700,0,999:41,9:94,24	Translocation	Heterozygous	P0_N2_treated_hermaphrodite	10350537	IV	0	0	0	0	0	rep.3	49230678	4		0	x
144217	IV	12688217	MantaINS:1544:0:0:0:0:0	A	AAAAAATACGATCGCACAAAAATAAACAACGACGCAACGACACTCCGCTGTTTTCAATCCCCGCCCACGATTTCATTTGCACTGCGGCCGCCACATTTCAGTGCAAATGAAATCGTGGCGAGGCTTAAAAATAGCGGAGTGTCGTTGCGTCGTTGTTTATTTTTGTGCGATCGTATTTTTTCTATAATAATT	999	PASS	END=12688217;SVTYPE=INS;SVLEN=191;CIGAR=1M191I;CIPOS=0,7;HOMLEN=7;HOMSEQ=AAAAATA	GT:FT:GQ:PL:PR:SR	1/1:PASS:113:999,116,0:0,13:0,37	Insertion	Homozygous	P0_N2_treated_hermaphrodite	12688217	IV	7	0	7	0	0	rep.3	49230678			7
144217	IV	13463713	MantaBND:517:2:8:0:0:0:1	T	]II:4309134]T	999	PASS	SVTYPE=BND;MATEID=MantaBND:517:2:8:0:0:0:0;CIPOS=0,19;HOMLEN=19;HOMSEQ=ATTTATTTATTTAATTAAC;BND_DEPTH=118;MATE_BND_DEPTH=116	GT:FT:GQ:PL:PR:SR	0/1:PASS:731:999,0,728:10,5:67,59	Translocation	Heterozygous	P0_N2_treated_hermaphrodite	4309134	II	19	0	19	0	0	rep.3	49230678	3		19		HelitronY1_CE
144217	IV	16571333	MantaBND:921:1:4:0:0:0:1	C	]III:4670559]C	240	PASS	SVTYPE=BND;MATEID=MantaBND:921:1:4:0:0:0:0;CIPOS=0,61;HOMLEN=61;HOMSEQ=TAGGGCTGTGCAACCGGACGTCCGGTTTTTTCGGACGTCCGAAAAACCGGACGCCGGACGC;BND_DEPTH=74;MATE_BND_DEPTH=50	GT:FT:GQ:PL:PR:SR	0/1:PASS:112:290,0,109:6,3:6,9	Translocation	Heterozygous	P0_N2_treated_hermaphrodite	4670559	III	61	0	61	0	0	rep.3	49230678	3		61			CELE4
144217	IV	16571333	MantaBND:921:4:8:0:0:0:1	C	]V:17490437]C	661	PASS	SVTYPE=BND;MATEID=MantaBND:921:4:8:0:0:0:0;CIPOS=0,38;HOMLEN=38;HOMSEQ=TAGGGCTGTGCAACCGGACGTCCGGTTTTTTCGGACGT;EVENT=MantaBND:921:4:8:0:0:0:0;JUNCTION_QUAL=530;BND_DEPTH=74;MATE_BND_DEPTH=41	GT:FT:GQ:PL:PR:SR	0/1:PASS:644:711,0,641:9,5:18,16	Translocation	Heterozygous	P0_N2_treated_hermaphrodite	17490437	V	38	0	38	0	0	rep.3	49230678	3		38	x
144217	IV	16571421	MantaBND:921:2:4:1:3:0:0	G	G[V:20705342[	179	PASS	SVTYPE=BND;MATEID=MantaBND:921:2:4:1:3:0:1;CIPOS=0,11;HOMLEN=11;HOMSEQ=TGTGCGTCCGG;BND_DEPTH=72;MATE_BND_DEPTH=140	GT:FT:GQ:PL:PR:SR	0/1:PASS:179:229,0,349:9,3:21,15	Translocation	Heterozygous	P0_N2_treated_hermaphrodite	20705342	V	11	0	11	0	0	rep.3	49230678	1		11
144217	IV	16571570	MantaBND:921:4:8:1:0:0:0	A	A[V:17490439[	661	PASS	SVTYPE=BND;MATEID=MantaBND:921:4:8:1:0:0:1;IMPRECISE;CIPOS=-142,142;EVENT=MantaBND:921:4:8:0:0:0:0;JUNCTION_QUAL=81;BND_DEPTH=49;MATE_BND_DEPTH=47	GT:FT:GQ:PL:PR	0/1:PASS:644:711,0,641:27,13	Translocation	Heterozygous	P0_N2_treated_hermaphrodite	17490439	V	0	-142	142	0	0	rep.3	49230678	1		142	x	(CCGGACG)n	(A)n
144217	IV	16786982	MantaBND:1232:2:3:0:0:0:1	T	]V:1125120]T	39	PASS	SVTYPE=BND;MATEID=MantaBND:1232:2:3:0:0:0:0;IMPRECISE;CIPOS=-305,306;BND_DEPTH=106;MATE_BND_DEPTH=52	GT:FT:GQ:PL:PR	0/1:PASS:39:89,0,804:53,12	Translocation	Heterozygous	P0_N2_treated_hermaphrodite	1125120	V	0	-305	306	0	0	rep.3	49230678	3		306	x		PALTTAA1_CE
144217	IV	17326133	MantaBND:91:1:6:0:0:0:0	A	A]I:11511638]	118	PASS	SVTYPE=BND;MATEID=MantaBND:91:1:6:0:0:0:1;IMPRECISE;CIPOS=-131,131;BND_DEPTH=54;MATE_BND_DEPTH=55	GT:FT:GQ:PL:PR	0/1:PASS:118:168,0,273:20,13	Translocation	Heterozygous	P0_N2_treated_hermaphrodite	11511638	I	0	-131	131	0	0	rep.3	49230678	2		131	x	PALTTAA3_CE	HAT3_CE
144217	IV	17492374	MantaINS:1648:0:0:3:0:0	T	TGAGTAAAATAAACTGTAAAGCCAGAGAGTAAAAAATACGGTGAAGCCAGAGAGTAAAATAAACTGTGAAGCCAGAGAGTAAAATATACGGTGAAGCCAGA	999	PASS	END=17492374;SVTYPE=INS;SVLEN=100;CIGAR=1M100I;CIPOS=0,16;HOMLEN=16;HOMSEQ=GAGTAAAATAAACTGT	GT:FT:GQ:PL:PR:SR	1/1:PASS:120:999,123,0:0,0:0,53	Insertion	Homozygous	P0_N2_treated_hermaphrodite	17492374	IV	16	0	16	0	0	rep.3	49230678			16
144217	V	226037	MantaBND:1669:0:2:0:0:0:1	G	[V:845512[G	721	PASS	SVTYPE=BND;MATEID=MantaBND:1669:0:2:0:0:0:0;CIPOS=0,16;HOMLEN=16;HOMSEQ=GAGCGATTTGCGGAGC;BND_DEPTH=58;MATE_BND_DEPTH=72	GT:FT:GQ:PL:PR:SR	0/1:PASS:532:771,0,529:21,2:28,19	Translocation	Heterozygous	P0_N2_treated_hermaphrodite	845512	V	16	0	16	0	0	rep.3	49230678	4		16	x		NPAL0A_CE
144217	V	306874	MantaBND:1129:2:3:0:0:0:0	T	]III:11114378]T	537	PASS	SVTYPE=BND;MATEID=MantaBND:1129:2:3:0:0:0:1;CIPOS=0,29;HOMLEN=29;HOMSEQ=CGCTTTTTTCACGGCCACCTCTTCCATTC;BND_DEPTH=16;MATE_BND_DEPTH=57	GT:FT:GQ:PL:PR:SR	0/1:PASS:103:587,0,100:1,5:15,15	Translocation	Heterozygous	P0_N2_treated_hermaphrodite	11114378	III	29	0	29	0	0	rep.3	49230678	3		29
144217	V	686153	MantaBND:468:0:3:0:0:0:0	T	]II:2141116]T	999	PASS	SVTYPE=BND;MATEID=MantaBND:468:0:3:0:0:0:1;CIPOS=0,12;HOMLEN=12;HOMSEQ=TAACAAGGAAAG;BND_DEPTH=129;MATE_BND_DEPTH=96	GT:FT:GQ:PL:PR:SR	0/1:PASS:429:999,0,426:19,15:26,47	Translocation	Heterozygous	P0_N2_treated_hermaphrodite	2141116	II	12	0	12	0	0	rep.3	49230678	3		12	x
144217	V	845496	MantaBND:1669:0:2:0:0:0:0	C	[V:226053[C	721	PASS	SVTYPE=BND;MATEID=MantaBND:1669:0:2:0:0:0:1;CIPOS=0,16;HOMLEN=16;HOMSEQ=TCCGCAAATCGCTCCT;BND_DEPTH=72;MATE_BND_DEPTH=58	GT:FT:GQ:PL:PR:SR	0/1:PASS:532:771,0,529:21,2:28,19	Translocation	Heterozygous	P0_N2_treated_hermaphrodite	226053	V	16	0	16	0	0	rep.3	49230678	4		16	x	NPAL0A_CE
144217	V	1125120	MantaBND:1232:2:3:0:0:0:0	G	G[IV:16786982[	39	PASS	SVTYPE=BND;MATEID=MantaBND:1232:2:3:0:0:0:1;IMPRECISE;CIPOS=-161,161;BND_DEPTH=52;MATE_BND_DEPTH=106	GT:FT:GQ:PL:PR	0/1:PASS:39:89,0,804:53,12	Translocation	Heterozygous	P0_N2_treated_hermaphrodite	16786982	IV	0	-161	161	0	0	rep.3	49230678	1		161		PALTTAA1_CE
144217	V	2600122	MantaINS:1705:0:0:0:0:0	G	GAAAAATTCGATGAATTTTTGAGAAAGTATCTGAACCAAAACAAAAAGTTATAAGCAGAATTTGCATAAAATAGTAAAACACATTATTGTGTATCATTTTACAATAAAATTAGATGTGTTTTACTATTTTATGCAACTTCTGCTTATAACTTTTTGTTTTGGTTCAGATACTTTCTC	999	PASS	END=2600122;SVTYPE=INS;SVLEN=176;CIGAR=1M176I;CIPOS=0,8;HOMLEN=8;HOMSEQ=AAAAATTC	GT:FT:GQ:PL:PR:SR	1/1:PASS:246:999,249,0:0,5:0,100	Insertion	Homozygous	P0_N2_treated_hermaphrodite	2600122	V	8	0	8	0	0	rep.3	49230678			8
144217	V	2646666	MantaBND:1182:1:3:0:0:0:1	A	A[X:13479522[	29	PASS	SVTYPE=BND;MATEID=MantaBND:1182:1:3:0:0:0:0;IMPRECISE;CIPOS=-301,302;BND_DEPTH=67;MATE_BND_DEPTH=59	GT:FT:GQ:PL:PR	0/1:PASS:29:79,0,323:22,9	Translocation	Heterozygous	P0_N2_treated_hermaphrodite	13479522	X	0	-301	302	0	0	rep.3	49230678	1		302		PALTTAA1_CE	HAT1_CE
144217	V	2701124	MantaBND:332:0:3:0:0:0:0	T	T]I:11630107]	136	PASS	SVTYPE=BND;MATEID=MantaBND:332:0:3:0:0:0:1;IMPRECISE;CIPOS=-164,165;BND_DEPTH=53;MATE_BND_DEPTH=99	GT:FT:GQ:PL:PR	0/1:PASS:136:186,0,767:52,17	Translocation	Heterozygous	P0_N2_treated_hermaphrodite	11630107	I	0	-164	165	0	0	rep.3	49230678	2		165	x	HAT1_CE
144217	V	4248545	MantaBND:402:1:2:0:0:0:1	T	T]I:14340296]	436	PASS	SVTYPE=BND;MATEID=MantaBND:402:1:2:0:0:0:0;CIPOS=0,7;HOMLEN=7;HOMSEQ=GCACTGC;BND_DEPTH=38;MATE_BND_DEPTH=33	GT:FT:GQ:PL:PR:SR	0/1:PASS:162:486,0,159:5,4:12,11	Translocation	Heterozygous	P0_N2_treated_hermaphrodite	14340296	I	7	0	7	0	0	rep.3	49230678	2		7
144217	V	4914049	MantaBND:1366:0:1:0:0:0:0	A	ATG[IV:6320432[	999	PASS	SVTYPE=BND;MATEID=MantaBND:1366:0:1:0:0:0:1;SVINSLEN=2;SVINSSEQ=TG;BND_DEPTH=63;MATE_BND_DEPTH=71	GT:FT:GQ:PL:PR:SR	0/1:PASS:213:999,0,210:12,22:18,30	Translocation	Heterozygous	P0_N2_treated_hermaphrodite	6320432	IV	0	0	0	0	0	rep.3	49230678	1	TG	0	x		PALTA3_CE
144217	V	8119478	MantaDUP:TANDEM:1858:0:1:0:0:0	A	<DUP:TANDEM>	68	PASS	END=8122256;SVTYPE=DUP;SVLEN=2778;IMPRECISE;CIPOS=-313,313;CIEND=-255,256	GT:FT:GQ:PL:PR	0/1:PASS:68:118,0,999:69,16	Tandem Duplication	Heterozygous	P0_N2_treated_hermaphrodite	8122256	V	0	-313	313	-255	256	rep.3	49230678			313
144217	V	9554018	MantaBND:82:2:4:0:0:0:1	A	A]X:466278]	999	PASS	SVTYPE=BND;MATEID=MantaBND:82:2:4:0:0:0:0;CIPOS=0,36;HOMLEN=36;HOMSEQ=TTCTCGGCATTTCGTGCCTACTTTCTCCCACCTTTT;BND_DEPTH=47;MATE_BND_DEPTH=141	GT:FT:GQ:PL:PR:SR	0/1:PASS:431:999,0,428:27,21:23,38	Translocation	Heterozygous	P0_N2_treated_hermaphrodite	466278	X	36	0	36	0	0	rep.3	49230678	2		36	x
144217	V	9554051	MantaBND:82:1:4:0:0:0:0	T	[X:466019[T	999	PASS	SVTYPE=BND;MATEID=MantaBND:82:1:4:0:0:0:1;CIPOS=0,37;HOMLEN=37;HOMSEQ=TTTCGCCTTCCGGCAAAAAGGTGGGAGAAAGAAGACG;BND_DEPTH=47;MATE_BND_DEPTH=95	GT:FT:GQ:PL:PR:SR	0/1:PASS:286:999,0,283:18,15:25,33	Translocation	Heterozygous	P0_N2_treated_hermaphrodite	466019	X	37	0	37	0	0	rep.3	49230678	4		37	x
144217	V	9724732	MantaBND:1329:0:1:0:1:0:0	A	]IV:4816396]TCGACTA	837	PASS	SVTYPE=BND;MATEID=MantaBND:1329:0:1:0:1:0:1;SVINSLEN=6;SVINSSEQ=TCGACT;BND_DEPTH=78;MATE_BND_DEPTH=100	GT:FT:GQ:PL:PR:SR	0/1:PASS:629:887,0,626:25,17:34,24	Translocation	Heterozygous	P0_N2_treated_hermaphrodite	4816396	IV	0	0	0	0	0	rep.3	49230678	3	TCGACT	0	x	CELE14B	IR3_CE
144217	V	9724752	MantaBND:1329:0:1:1:0:0:1	A	A]IV:4816470]	138	PASS	SVTYPE=BND;MATEID=MantaBND:1329:0:1:1:0:0:0;IMPRECISE;CIPOS=-239,239;BND_DEPTH=78;MATE_BND_DEPTH=52	GT:FT:GQ:PL:PR	0/1:PASS:138:188,0,402:28,14	Translocation	Heterozygous	P0_N2_treated_hermaphrodite	4816470	IV	0	-239	239	0	0	rep.3	49230678	2		239	x	CELE14B	IR3_CE
144217	V	10866803	MantaBND:5:0:2:0:0:0:1	A	A]I:238546]	46	PASS	SVTYPE=BND;MATEID=MantaBND:5:0:2:0:0:0:0;IMPRECISE;CIPOS=-233,233;BND_DEPTH=143;MATE_BND_DEPTH=117	GT:FT:GQ:PL:PR	0/1:PASS:46:96,0,999:85,18	Translocation	Heterozygous	P0_N2_treated_hermaphrodite	238546	I	0	-233	233	0	0	rep.3	49230678	2		233	x
144217	V	11690781	MantaINS:1956:0:0:0:0:0	A	AAAAATTTTCAATAAAAAATCAAATAAATAAATAAATAAATATGCTGATAAAAACACACAAACTATTGAATTGATATCACTGATAAAATAATAAAGAATAATCAGTCTTGCTTTGGAATTTTTATTCAAAAATCAAGACTGATTATTCTTTATTATTTTATCAGTGATATCAATTCAATAGTTTGTGTGTTTTTATCAGCATATTTATTTATTTATTTATTTGATTTTTTATTGAAAATTTTTTATTG	999	PASS	END=11690781;SVTYPE=INS;SVLEN=247;CIGAR=1M247I;CIPOS=0,8;HOMLEN=8;HOMSEQ=AAAATTTT	GT:FT:GQ:PL:PR:SR	1/1:PASS:128:999,131,0:0,1:0,51	Insertion	Homozygous	P0_N2_treated_hermaphrodite	11690781	V	8	0	8	0	0	rep.3	49230678			8
144217	V	12167424	MantaINS:1958:0:0:0:0:0	C	CCCTGGTGGTCCTGGTGGTCCGGCTGGGCATGTGATGCAAGCAGAAGCAGATGAGTGTTGTTCAGCAACTCCAGCTCCTCCAGCTTGTCCATCACCTCCTGGTTCTCCTGCCTCTCCTGGAGCACCATCCTCT	999	PASS	END=12167424;SVTYPE=INS;SVLEN=132;CIGAR=1M132I;CIPOS=0,20;HOMLEN=20;HOMSEQ=CCTGGTGGTCCTGGTGGTCC	GT:FT:GQ:PL:PR:SR	1/1:PASS:206:999,209,0:0,0:0,86	Insertion	Homozygous	P0_N2_treated_hermaphrodite	12167424	V	20	0	20	0	0	rep.3	49230678			20
144217	V	13362655	MantaDUP:TANDEM:1981:0:1:0:0:0	T	<DUP:TANDEM>	999	PASS	END=13367099;SVTYPE=DUP;SVLEN=4444;CIPOS=0,2;CIEND=0,2;HOMLEN=2;HOMSEQ=AT	GT:FT:GQ:PL:PR:SR	0/1:PASS:999:999,0,999:40,24:66,33	Tandem Duplication	Heterozygous	P0_N2_treated_hermaphrodite	13367099	V	2	0	2	0	2	rep.3	49230678			2
144217	V	14586206	MantaDUP:TANDEM:2007:1:1:3:0:0	C	<DUP:TANDEM>	23	PASS	END=14586755;SVTYPE=DUP;SVLEN=549;IMPRECISE;CIPOS=-175,175;CIEND=-211,211	GT:FT:GQ:PL:PR	0/1:PASS:23:73,0,748:50,11	Tandem Duplication	Heterozygous	P0_N2_treated_hermaphrodite	14586755	V	0	-175	175	-211	211	rep.3	49230678			211
144217	V	17040145	MantaBND:1129:1:2:0:0:0:1	A	A]III:11114437]	205	PASS	SVTYPE=BND;MATEID=MantaBND:1129:1:2:0:0:0:0;CIPOS=0,59;HOMLEN=59;HOMSEQ=CACGGGTTTCTAATTTCCCCCCTGTTTTCAAATGGAAGAGGTGGCCGTGAAAAAAGCGA;BND_DEPTH=27;MATE_BND_DEPTH=57	GT:FT:GQ:PL:PR:SR	0/1:PASS:117:255,0,114:8,4:6,5	Translocation	Heterozygous	P0_N2_treated_hermaphrodite	11114437	III	59	0	59	0	0	rep.3	49230678	2		59	x	LINE2F_CE
144217	V	17040257	MantaBND:1129:0:1:0:0:0:0	G	[III:11114142[G	224	PASS	SVTYPE=BND;MATEID=MantaBND:1129:0:1:0:0:0:1;CIPOS=0,5;HOMLEN=5;HOMSEQ=GGGGG;BND_DEPTH=39;MATE_BND_DEPTH=37	GT:FT:GQ:PL:PR:SR	0/1:PASS:224:274,0,335:14,5:18,5	Translocation	Heterozygous	P0_N2_treated_hermaphrodite	11114142	III	5	0	5	0	0	rep.3	49230678	4		5	x
144217	V	17490437	MantaBND:921:4:8:0:0:0:0	G	G[IV:16571333[	661	PASS	SVTYPE=BND;MATEID=MantaBND:921:4:8:0:0:0:1;CIPOS=0,38;HOMLEN=38;HOMSEQ=CTAGGGCTGTGCAACCGGACGTCCGGTTTTTTCGGACG;EVENT=MantaBND:921:4:8:0:0:0:0;JUNCTION_QUAL=530;BND_DEPTH=41;MATE_BND_DEPTH=74	GT:FT:GQ:PL:PR:SR	0/1:PASS:644:711,0,641:9,5:18,16	Translocation	Heterozygous	P0_N2_treated_hermaphrodite	16571333	IV	38	0	38	0	0	rep.3	49230678	1		38	x
144217	V	17490439	MantaBND:921:4:8:1:0:0:1	T	]IV:16571570]T	661	PASS	SVTYPE=BND;MATEID=MantaBND:921:4:8:1:0:0:0;IMPRECISE;CIPOS=-253,253;EVENT=MantaBND:921:4:8:0:0:0:0;JUNCTION_QUAL=81;BND_DEPTH=47;MATE_BND_DEPTH=49	GT:FT:GQ:PL:PR	0/1:PASS:644:711,0,641:27,13	Translocation	Heterozygous	P0_N2_treated_hermaphrodite	16571570	IV	0	-253	253	0	0	rep.3	49230678	3		253	x	(A)n	(CCGGACG)n
144217	V	18175236	MantaDEL:2092:0:0:2:0:0	GCGCAATTCTAGTGACTTGACGCAATTCTAGTTCCTTGACGCAATTCTAGTGTATTGACGCAATTCTAGTACTTTGGCGCTATTCCAGTACTTTGGCGCAATTCTAGTTCCTTGACGCAATTCTAGTGTATTGACGCATATCTAGTACTTTGGCGCTATTCCAGTACATTGGCGCAATTCTAGTGGCTTGACGCAATTATCGTGCCTTGGTGCAATTCTAGTTCCTTGACGCAATTCTAGTGGCTTGACGCAATTCTAGTGTATTGA	G	572	PASS	END=18175502;SVTYPE=DEL;SVLEN=-266;CIGAR=1M266D;CIPOS=0,26;HOMLEN=26;HOMSEQ=CGCAATTCTAGTGACTTGACGCAATT	GT:FT:GQ:PL:PR:SR	0/1:PASS:572:622,0,746:30,11:61,20	Deletion	Heterozygous	P0_N2_treated_hermaphrodite	18175502	V	26	0	26	0	0	rep.3	49230678			26
144217	V	18683253	MantaDEL:2114:1:1:0:0:0	CAAAAAATTTCAAAATTCCAAAAAATTTCAAAATTCCAAAAAAATTCAAAATTTCA	C	230	PASS	END=18683308;SVTYPE=DEL;SVLEN=-55;CIGAR=1M55D;CIPOS=0,5;HOMLEN=5;HOMSEQ=AAAAA	GT:FT:GQ:PL:PR:SR	0/1:PASS:228:280,0,230:3,0:19,9	Deletion	Heterozygous	P0_N2_treated_hermaphrodite	18683308	V	5	0	5	0	0	rep.3	49230678			5
144217	V	18858817	MantaINS:2129:0:0:1:0:0	T	TATTTCGGCCTGAAATTTCAAATTTTCAGAACCTAGCCGATATGGGTGTCAAAATTTCGCAAATTTCATGGAGAATTCAAATTTTAATAGGAAAAACTACGAAAATCTCAAAATTTAGCAAATTTACAAGTGCAGGGACATGGGACACTCCACGTAAGATTTGAGTAACATTTTCGAAATCTCTGCGAAAATTTGACACCCATATTGACTGGGTTCTGAGAAATTTGAGTTTCCGGGCCGAAATAGGCCG	999	PASS	END=18858817;SVTYPE=INS;SVLEN=249;CIGAR=1M249I;CIPOS=0,32;HOMLEN=32;HOMSEQ=ATTTCGGCCTGAAATTTCAAATTTTCAGAACC	GT:FT:GQ:PL:PR:SR	1/1:PASS:92:999,95,0:0,1:0,39	Insertion	Homozygous	P0_N2_treated_hermaphrodite	18858817	V	32	0	32	0	0	rep.3	49230678			32
144217	V	19800132	MantaINS:2150:0:1:0:0:0	G	GTTGAATTCCTGCCAAAAAAATTTTCTTCAAAAATTTTAATTTCCAGCCAAAATGTTTTTTTTCCGAAAATTTAAGTTTCCCGCTAAAATATTTTTCTCAAAAATTTTAATTTTCCGCCAAAAAATTTTCCAGAAAGTTTGAATTTCTTCAAAAAAT	999	PASS	END=19800132;SVTYPE=INS;SVLEN=156;CIGAR=1M156I;CIPOS=0,53;HOMLEN=53;HOMSEQ=TTGAATTCCTGCCAAAAAAATTTTCTTCAAAAATTTTAATTTCCAGCCAAAAT	GT:FT:GQ:PL:PR:SR	1/1:PASS:71:999,74,0:0,0:0,33	Insertion	Homozygous	P0_N2_treated_hermaphrodite	19800132	V	53	0	53	0	0	rep.3	49230678			53
144217	V	19877606	MantaDEL:377:1:1:3:0:0	TTTTTTTTCATCACACTTAATTAAAAAATTCATATTCTTCATGAAATTCTACACATTTCCCAATTTGGAA	TGAAT	813	PASS	END=19877675;SVTYPE=DEL;SVLEN=-69;CIGAR=1M4I69D	GT:FT:GQ:PL:PR:SR	0/1:PASS:399:863,0,396:5,0:33,22	Deletion	Heterozygous	P0_N2_treated_hermaphrodite	19877675	V	0	0	0	0	0	rep.3	49230678			0
144217	V	20398658	MantaINS:2160:0:0:0:0:0	GGATT	GCGATTTTTAGAAATTTTGTGGAATTTTAGAACGTTTTTAAGAGTTTTTTGTGAATTTTTGGAACTTATTGAGGTTTTTAGGGATTCTTTTTTTGCAATTTTTGCGGACTTTTTGGAGGTTTTGGGAGAAATTTTGAGCGTTTTGGAAGGTTTTTAGACGATTTTTTTTGCAAATTTTGGAGATTTTTAGTATATTTTTCAATTTTAATCGGAATTTTAGAGAGAATCAGAAGGTTTTTGGGAGTTTTTTTTGCGAATTTTTGGAACTTTCTGAGGTTTTTAGAGA	999	PASS	END=20398662;SVTYPE=INS;SVLEN=285;CIGAR=1M285I4D	GT:FT:GQ:PL:PR:SR	1/1:PASS:53:999,56,0:2,0:2,32	Insertion	Homozygous	P0_N2_treated_hermaphrodite	20398662	V	0	0	0	0	0	rep.3	49230678			0
144217	V	20705342	MantaBND:921:2:4:1:3:0:1	T	]IV:16571421]T	179	PASS	SVTYPE=BND;MATEID=MantaBND:921:2:4:1:3:0:0;CIPOS=0,11;HOMLEN=11;HOMSEQ=GTGCGTCCGGC;BND_DEPTH=140;MATE_BND_DEPTH=72	GT:FT:GQ:PL:PR:SR	0/1:PASS:179:229,0,349:9,3:21,15	Translocation	Heterozygous	P0_N2_treated_hermaphrodite	16571421	IV	11	0	11	0	0	rep.3	49230678	3		11	x
144217	V	20705450	MantaBND:921:1:2:2:1:0:1	A	A[III:4670588[	863	PASS	SVTYPE=BND;MATEID=MantaBND:921:1:2:2:1:0:0;BND_DEPTH=129;MATE_BND_DEPTH=50	GT:FT:GQ:PL:PR:SR	0/1:PASS:451:913,0,448:2,5:44,21	Translocation	Heterozygous	P0_N2_treated_hermaphrodite	4670588	III	0	0	0	0	0	rep.3	49230678	1		0	x
144217	X	5445	MantaBND:908:1:5:0:2:0:0	T	T[IV:2380075[	762	PASS	SVTYPE=BND;MATEID=MantaBND:908:1:5:0:2:0:1;CIPOS=0,26;HOMLEN=26;HOMSEQ=TTTAGGGTCTCGCCGCGAAATTCAGC;BND_DEPTH=129;MATE_BND_DEPTH=65	GT:FT:GQ:PL:PR:SR	0/1:PASS:762:812,0,999:40,4:73,29	Translocation	Heterozygous	P0_N2_treated_hermaphrodite	2380075	IV	26	0	26	0	0	rep.3	49230678	1		26		PALTTAA2_CE
144217	X	216853	MantaBND:1245:1:2:1:0:0:1	T	[X:256070[T	999	PASS	SVTYPE=BND;MATEID=MantaBND:1245:1:2:1:0:0:0;IMPRECISE;CIPOS=-142,142;EVENT=MantaBND:1245:1:2:0:0:0:0;JUNCTION_QUAL=1;BND_DEPTH=41;MATE_BND_DEPTH=36	GT:FT:GQ:PL:PR	1/1:PASS:94:999,97,0:0,2	Translocation	Homozygous	P0_N2_treated_hermaphrodite	256070	X	0	-142	142	0	0	rep.3	49230678	4		142	x
144217	X	216888	MantaBND:1245:2:4:0:0:0:1	T	T]IV:1312653]	999	PASS	SVTYPE=BND;MATEID=MantaBND:1245:2:4:0:0:0:0;CIPOS=0,8;HOMLEN=8;HOMSEQ=GTTGATCT;BND_DEPTH=32;MATE_BND_DEPTH=66	GT:FT:GQ:PL:PR:SR	0/1:PASS:367:999,0,364:14,6:22,28	Translocation	Heterozygous	P0_N2_treated_hermaphrodite	1312653	IV	8	0	8	0	0	rep.3	49230678	2		8	x
144217	X	216891	MantaBND:1245:1:2:0:0:0:0	T	T]X:256071]	999	PASS	SVTYPE=BND;MATEID=MantaBND:1245:1:2:0:0:0:1;CIPOS=0,5;HOMLEN=5;HOMSEQ=GATCT;EVENT=MantaBND:1245:1:2:0:0:0:0;JUNCTION_QUAL=999;BND_DEPTH=32;MATE_BND_DEPTH=36	GT:FT:GQ:PL:PR:SR	1/1:PASS:94:999,97,0:0,19:0,16	Translocation	Homozygous	P0_N2_treated_hermaphrodite	256071	X	5	0	5	0	0	rep.3	49230678	2		5	x
144217	X	256066	MantaBND:1245:1:2:0:0:0:1	G	G]X:216896]	999	PASS	SVTYPE=BND;MATEID=MantaBND:1245:1:2:0:0:0:0;CIPOS=0,5;HOMLEN=5;HOMSEQ=AGATC;EVENT=MantaBND:1245:1:2:0:0:0:0;JUNCTION_QUAL=999;BND_DEPTH=36;MATE_BND_DEPTH=32	GT:FT:GQ:PL:PR:SR	1/1:PASS:94:999,97,0:0,19:0,16	Translocation	Homozygous	P0_N2_treated_hermaphrodite	216896	X	5	0	5	0	0	rep.3	49230678	2		5	x
144217	X	256070	MantaBND:1245:1:2:1:0:0:0	T	[X:216853[T	999	PASS	SVTYPE=BND;MATEID=MantaBND:1245:1:2:1:0:0:1;IMPRECISE;CIPOS=-182,183;EVENT=MantaBND:1245:1:2:0:0:0:0;JUNCTION_QUAL=1;BND_DEPTH=36;MATE_BND_DEPTH=41	GT:FT:GQ:PL:PR	1/1:PASS:94:999,97,0:0,2	Translocation	Homozygous	P0_N2_treated_hermaphrodite	216853	X	0	-182	183	0	0	rep.3	49230678	4		183	x
144217	X	465982	MantaBND:82:1:4:0:0:0:1	G	[V:9554088[G	999	PASS	SVTYPE=BND;MATEID=MantaBND:82:1:4:0:0:0:0;CIPOS=0,37;HOMLEN=37;HOMSEQ=TCTTCTTTCTCCCACCTTTTTGCCGGAAGGCGAAAAA;BND_DEPTH=95;MATE_BND_DEPTH=47	GT:FT:GQ:PL:PR:SR	0/1:PASS:286:999,0,283:18,15:25,33	Translocation	Heterozygous	P0_N2_treated_hermaphrodite	9554088	V	37	0	37	0	0	rep.3	49230678	4		37	x
144217	X	466044	MantaBND:82:0:1:0:1:0:0	G	]I:2652464]G	871	PASS	SVTYPE=BND;MATEID=MantaBND:82:0:1:0:1:0:1;CIPOS=0,4;HOMLEN=4;HOMSEQ=TGGT;BND_DEPTH=134;MATE_BND_DEPTH=33	GT:FT:GQ:PL:PR:SR	0/1:PASS:325:921,0,322:17,3:30,27	Translocation	Heterozygous	P0_N2_treated_hermaphrodite	2652464	I	4	0	4	0	0	rep.3	49230678	3		4	x
144217	X	466242	MantaBND:82:2:4:0:0:0:0	A	A]V:9554054]	999	PASS	SVTYPE=BND;MATEID=MantaBND:82:2:4:0:0:0:1;CIPOS=0,36;HOMLEN=36;HOMSEQ=AAAAGGTGGGAGAAAGTAGGCACGAAATGCCGAGAA;BND_DEPTH=141;MATE_BND_DEPTH=47	GT:FT:GQ:PL:PR:SR	0/1:PASS:431:999,0,428:27,21:23,38	Translocation	Heterozygous	P0_N2_treated_hermaphrodite	9554054	V	36	0	36	0	0	rep.3	49230678	2		36	x
144217	X	6833298	MantaINS:15:3:3:0:0:0	T	TCTAAACTTGGGCAAAAGTTAGGCAAAACTTTGGCAAGAGTTGGGTGAAACTTGGGTTAGACTTTGGTAAAGCTTGAATCCAAGTTTTGCCAAAGTCTTGCCTAACTTTTGCCCAAGTTTAGACAGCTTCTGATCCAAGTTAATATTTTTTGGG	999	PASS	END=6833298;SVTYPE=INS;SVLEN=153;CIGAR=1M153I;CIPOS=0,14;HOMLEN=14;HOMSEQ=CTAAACTTGGGCAA	GT:FT:GQ:PL:PR:SR	1/1:PASS:62:999,65,0:0,7:8,31	Insertion	Homozygous	P0_N2_treated_hermaphrodite	6833298	X	14	0	14	0	0	rep.3	49230678			14
144217	X	8429683	MantaINS:2375:0:0:0:2:0	G	<INS>	999	PASS	END=8429683;SVTYPE=INS;CIPOS=0,8;CIEND=0,8;HOMLEN=8;HOMSEQ=CGTCCGGT;LEFT_SVINSSEQ=CGTCCGGTCGTCCGAACCGGACGCACATGCGTCCGGTTGGGGGTAGGTTCCCACGGCGGCCGACAATTTCCGAGTTTCGCCACTCACTATACTTAATCAGTAATTTTATAG;RIGHT_SVINSSEQ=CACTATACTTAATCAGTAATTTTATAGTGAGTGGCGAAACTCGGAAATTGTCGGCCGTCGTGGATAGCTACCCCCAACCGGACGCATGTGCGTCCGGTTCGGACGACCGGA	GT:FT:GQ:PL:PR:SR	1/1:PASS:111:999,114,0:1,22:2,32	Insertion	Homozygous	P0_N2_treated_hermaphrodite	8429683	X	8	0	8	0	8	rep.3	49230678			8
144217	X	8651736	MantaINS:451:1:1:0:3:0	G	<INS>	999	PASS	END=8651736;SVTYPE=INS;CIPOS=0,1;CIEND=0,1;HOMLEN=1;HOMSEQ=G;LEFT_SVINSSEQ=GGCATCGAGAGAGGGGGCATCGCGTTCTAAGGGGGCATTAGGTCAAAGGGGGCATTTGTTCGTAGGGGGCATCCGTTC;RIGHT_SVINSSEQ=CCTTTGACCTAATGCCCCCTTAGAACGCGATGCCCCCTCTCTCGATGCCCCCTGGGA	GT:FT:GQ:PL:PR:SR	1/1:PASS:71:999,74,0:0,1:0,26	Insertion	Homozygous	P0_N2_treated_hermaphrodite	8651736	X	1	0	1	0	1	rep.3	49230678			1
144217	X	8651737	MantaBND:451:0:1:0:0:0:1	G	]II:1659790]G	633	PASS	SVTYPE=BND;MATEID=MantaBND:451:0:1:0:0:0:0;CIPOS=0,9;HOMLEN=9;HOMSEQ=CATAGGCCA;EVENT=MantaBND:451:0:1:0:0:0:0;JUNCTION_QUAL=536;BND_DEPTH=55;MATE_BND_DEPTH=58	GT:FT:GQ:PL:PR:SR	0/1:PASS:633:683,0,809:28,6:33,13	Translocation	Heterozygous	P0_N2_treated_hermaphrodite	1659790	II	9	0	9	0	0	rep.3	49230678	3		9	x
144217	X	8651745	MantaBND:451:0:1:1:0:0:1	C	C[II:1659341[	633	PASS	SVTYPE=BND;MATEID=MantaBND:451:0:1:1:0:0:0;IMPRECISE;CIPOS=-249,249;EVENT=MantaBND:451:0:1:0:0:0:0;JUNCTION_QUAL=47;BND_DEPTH=55;MATE_BND_DEPTH=46	GT:FT:GQ:PL:PR	0/1:PASS:633:683,0,809:16,8	Translocation	Heterozygous	P0_N2_treated_hermaphrodite	1659341	II	0	-249	249	0	0	rep.3	49230678	1		249	x	(TTGTAT)n	LONGPAL3
144217	X	12190992	MantaBND:2466:0:1:0:0:0:1	C	C]X:12199124]	999	PASS	SVTYPE=BND;MATEID=MantaBND:2466:0:1:0:0:0:0;CIPOS=0,4;HOMLEN=4;HOMSEQ=GATC;BND_DEPTH=43;MATE_BND_DEPTH=58	GT:FT:GQ:PL:PR:SR	1/1:PASS:121:999,124,0:0,18:0,42	Translocation	Homozygous	P0_N2_treated_hermaphrodite	12199124	X	4	0	4	0	0	rep.3	49230678	2		4	x
144217	X	12199120	MantaBND:2466:0:1:0:0:0:0	T	T]X:12190996]	999	PASS	SVTYPE=BND;MATEID=MantaBND:2466:0:1:0:0:0:1;CIPOS=0,4;HOMLEN=4;HOMSEQ=GATC;BND_DEPTH=58;MATE_BND_DEPTH=43	GT:FT:GQ:PL:PR:SR	1/1:PASS:121:999,124,0:0,18:0,42	Translocation	Homozygous	P0_N2_treated_hermaphrodite	12190996	X	4	0	4	0	0	rep.3	49230678	2		4	x
144217	X	13479522	MantaBND:1182:1:3:0:0:0:0	A	]V:2646666]A	29	PASS	SVTYPE=BND;MATEID=MantaBND:1182:1:3:0:0:0:1;IMPRECISE;CIPOS=-150,151;BND_DEPTH=59;MATE_BND_DEPTH=67	GT:FT:GQ:PL:PR	0/1:PASS:29:79,0,323:22,9	Translocation	Heterozygous	P0_N2_treated_hermaphrodite	2646666	V	0	-150	151	0	0	rep.3	49230678	3		151	x	HAT1_CE	PALTTAA1_CE
144217	X	14788284	MantaDEL:2525:0:1:0:0:0	TGCGTCCGGTTTGGGGTAGCTTTCCATGGCGGCCGACAATTTCCGAGTTTCGCCACTGACTATAAAATTGCTGATTAAGTATAGTTAGTCGAGAAACTCGGAAATTGTCGGCCGCCGTGAAAAGCTACCCCAAACCGGACACATGG	T	194	PASS	END=14788429;SVTYPE=DEL;SVLEN=-145;CIGAR=1M145D;CIPOS=0,9;HOMLEN=9;HOMSEQ=GCGTCCGGT	GT:FT:GQ:PL:PR:SR	0/1:PASS:194:244,0,455:17,0:32,10	Deletion	Heterozygous	P0_N2_treated_hermaphrodite	14788429	X	9	0	9	0	0	rep.3	49230678			9
144217	X	15750392	MantaBND:354:12:13:0:0:0:0	G	G]III:56296]	999	PASS	SVTYPE=BND;MATEID=MantaBND:354:12:13:0:0:0:1;CIPOS=0,21;HOMLEN=21;HOMSEQ=AAAAATTATGGTAAGTTTTCA;BND_DEPTH=56;MATE_BND_DEPTH=66	GT:FT:GQ:PL:PR:SR	0/1:PASS:270:999,0,267:21,5:16,33	Translocation	Heterozygous	P0_N2_treated_hermaphrodite	56296	III	21	0	21	0	0	rep.3	49230678	2		21			LONGPAL3
144217	X	16224891	MantaINS:900:2:2:0:0:0	G	GCGGCCCCGACCCACTTTTTGGGTCGGGGTCACGTCCCCGACCCACTATTTGGGTCGGGGTCGCGTCCCCGACCCATTGTTTGGGTCGGGGTC	988	PASS	END=16224891;SVTYPE=INS;SVLEN=92;CIGAR=1M92I	GT:FT:GQ:PL:PR:SR	1/1:PASS:65:999,68,0:0,0:0,27	Insertion	Homozygous	P0_N2_treated_hermaphrodite	16224891	X	0	0	0	0	0	rep.3	49230678			0
144217	X	16884752	MantaBND:589:0:2:0:0:0:1	T	[II:6187764[T	999	PASS	SVTYPE=BND;MATEID=MantaBND:589:0:2:0:0:0:0;CIPOS=0,7;HOMLEN=7;HOMSEQ=CGGGATG;BND_DEPTH=150;MATE_BND_DEPTH=143	GT:FT:GQ:PL:PR:SR	0/1:PASS:538:999,0,535:31,8:38,39	Translocation	Heterozygous	P0_N2_treated_hermaphrodite	6187764	II	7	0	7	0	0	rep.3	49230678	4		7	x	(CGGGATGGAT)n	(TCCCGATCCA)n
144219	I	678691	MantaDEL:14:0:0:0:0:0	TCCATATGATCCGTCGAAGCTGAAGGATCAGAACATCAGGAGGTACCCATGTGATCATTCGGCTCTGAAAGATCAGATCATCAGGCAGAGCCTCATGTTCTTTTGGAGCTGAAGGATCAGAACATCAGGAAGAGCCTCATGATCCTTTGGATCTGAAGGATCAGACCATCAGGAGGTACCCTTACGATCCTTCTTATCTGAAAGATCAGATCATCAGAAGGTA	T	429	PASS	END=678913;SVTYPE=DEL;SVLEN=-222;CIGAR=1M222D;CIPOS=0,4;HOMLEN=4;HOMSEQ=CCAT	GT:FT:GQ:PL:PR:SR	0/1:PASS:429:479,0,991:34,4:72,18	Deletion	Heterozygous	P0_N2_treated_hermaphrodite	678913	I	4	0	4	0	0	rep.4	58111353			4
144219	I	1059751	MantaINS:35:2:2:1:3:0	G	<INS>	999	PASS	END=1059751;SVTYPE=INS;CIPOS=0,11;CIEND=0,11;HOMLEN=11;HOMSEQ=GAAATGGGCGG;LEFT_SVINSSEQ=GAAATGGGCGGAGTTTTGGAGTACAAAAGCCCCGCCCATTTCTGACTAGGATTCGGGGAAATTGCTTTAAAACACGCCTATGGTACCATAGTGATCGAATTTCATAATAAAAAATTTTTAAAAAATTGTCTAAATTTTATATGATTTTTTGAAAATTGGAAAAATCTCAGTTTTCCCCCCTAATTCCTATTTTAATTACCGCCAATTGGATTTGTTCGGTGGAGCGCGCTTGCATTATTTTTTTATTAATTTATTTTATTTATTCTCGTTGTTTCACTG;RIGHT_SVINSSEQ=GGAATTAGGGGGGAAA…	GT:FT:GQ:PL:PR:SR	1/1:PASS:121:999,124,0:0,6:0,39	Insertion	Homozygous	P0_N2_treated_hermaphrodite	1059751	I	11	0	11	0	11	rep.4	58111353			11
144219	I	1733437	MantaDEL:50:0:1:0:0:0	CGTCTTGCCCAAGTTTGGCCCAAAAAATATTAACTTGGGTCAGAAGTTGGGCAAGACTTTGGCGAAACTTGGATTCGGGCGAAATCAAAGTTTAAGCCAAGGTTCACCAAACTCTTGGCAAACGTTTACCCAAGTTTGAAACGAAACAAAAAGTTTGGGCCAAAGTTTGGCAAGAGTTGGGTGAAACTTGGCTTAAACTTTGATTTCACCCGAATCCAAGTTTTGCCAAA	C	61	PASS	END=1733666;SVTYPE=DEL;SVLEN=-229;CIGAR=1M229D;CIPOS=0,11;HOMLEN=11;HOMSEQ=GTCTTGCCCAA	GT:FT:GQ:PL:PR:SR	0/1:PASS:61:111,0,665:31,1:46,5	Deletion	Heterozygous	P0_N2_treated_hermaphrodite	1733666	I	11	0	11	0	0	rep.4	58111353			11
144219	I	2002703	MantaBND:62:0:1:0:0:0:1	C	]III:468056]C	793	PASS	SVTYPE=BND;MATEID=MantaBND:62:0:1:0:0:0:0;BND_DEPTH=47;MATE_BND_DEPTH=117	GT:FT:GQ:PL:PR:SR	0/1:PASS:793:843,0,999:41,3:69,25	Translocation	Heterozygous	P0_N2_treated_hermaphrodite	468056	III	0	0	0	0	0	rep.4	58111353	3		0	x	PAL5A_CE	CEMUDR1
144219	I	2295502	MantaBND:71:0:1:0:0:0:1	A	[V:1772204[A	545	PASS	SVTYPE=BND;MATEID=MantaBND:71:0:1:0:0:0:0;CIPOS=0,27;HOMLEN=27;HOMSEQ=AAGCCGAATAATTATTAGAGCGCGCTT;BND_DEPTH=93;MATE_BND_DEPTH=38	GT:FT:GQ:PL:PR:SR	0/1:PASS:421:595,0,418:16,2:24,15	Translocation	Heterozygous	P0_N2_treated_hermaphrodite	1772204	V	27	0	27	0	0	rep.4	58111353	4		27		CELE14A	PALTTAA1_CE
144219	I	2398777	MantaBND:77:0:1:0:0:0:1	A	AGCATTGGTTTTCCATAA]I:4059873]	54	PASS	SVTYPE=BND;MATEID=MantaBND:77:0:1:0:0:0:0;SVINSLEN=17;SVINSSEQ=GCATTGGTTTTCCATAA;BND_DEPTH=56;MATE_BND_DEPTH=65	GT:FT:GQ:PL:PR:SR	0/1:PASS:54:104,0,999:46,3:81,6	Translocation	Heterozygous	P0_N2_treated_hermaphrodite	4059873	I	0	0	0	0	0	rep.4	58111353	2	GCATTGGTTTTCCATAA	0		(AAAT)n
144219	I	2652464	MantaINS:75:0:0:0:2:0	A	<INS>	999	PASS	END=2652464;SVTYPE=INS;CIPOS=0,4;CIEND=0,4;HOMLEN=4;HOMSEQ=GTGG;LEFT_SVINSSEQ=GTGGTAGAAAGGTGGCAAAAAGGTGAGAGGAAGGTGGCAAAAAGGTGTACAGAAGGTGGGAA;RIGHT_SVINSSEQ=CCCACCTTCTGTACACCTTTTTGCCACCTTCCTCTCACCTTTTTGCCACCTTTCTACCACCTTTTTGCCGCCTAGTTATGGCCATTTTTCGCCTTCCGGCAAAAAG	GT:FT:GQ:PL:PR:SR	1/1:PASS:92:999,95,0:0,6:0,29	Insertion	Homozygous	P0_N2_treated_hermaphrodite	2652464	I	4	0	4	0	4	rep.4	58111353			4
144219	I	2652464	MantaBND:75:0:1:0:0:0:0	A	A[X:466044[	996	PASS	SVTYPE=BND;MATEID=MantaBND:75:0:1:0:0:0:1;CIPOS=0,4;HOMLEN=4;HOMSEQ=GTGG;BND_DEPTH=52;MATE_BND_DEPTH=140	GT:FT:GQ:PL:PR:SR	0/1:PASS:402:999,0,399:1,4:41,29	Translocation	Heterozygous	P0_N2_treated_hermaphrodite	466044	X	4	0	4	0	0	rep.4	58111353	1		4	x
144219	I	4059873	MantaBND:77:0:1:0:0:0:0	A	ATTATGGAAAACCAATGC]I:2398777]	54	PASS	SVTYPE=BND;MATEID=MantaBND:77:0:1:0:0:0:1;SVINSLEN=17;SVINSSEQ=TTATGGAAAACCAATGC;BND_DEPTH=65;MATE_BND_DEPTH=56	GT:FT:GQ:PL:PR:SR	0/1:PASS:54:104,0,999:46,3:81,6	Translocation	Heterozygous	P0_N2_treated_hermaphrodite	2398777	I	0	0	0	0	0	rep.4	58111353	2	TTATGGAAAACCAATGC	0			(AAAT)n
144219	I	4785680	MantaINS:127:0:0:0:2:0	T	<INS>	668	PASS	END=4785680;SVTYPE=INS;LEFT_SVINSSEQ=GGGGGTAGCTATCCACGACGGCCGACAATTTCCAAGTTTCGCCACTC;RIGHT_SVINSSEQ=CTATAAAATTGCTGATTAAGTATAGTGAGTGGCGAAACTCGGAAATTGTCGGCCGCCGTGGAAACCTACCCCAAACC	GT:FT:GQ:PL:PR:SR	1/1:PASS:47:721,50,0:0,5:0,15	Insertion	Homozygous	P0_N2_treated_hermaphrodite	4785680	I	0	0	0	0	0	rep.4	58111353			0
144219	I	5092572	MantaBND:130:0:1:0:0:0:1	T	TT]X:16659005]	174	PASS	SVTYPE=BND;MATEID=MantaBND:130:0:1:0:0:0:0;SVINSLEN=1;SVINSSEQ=T;BND_DEPTH=51;MATE_BND_DEPTH=59	GT:FT:GQ:PL:PR:SR	0/1:PASS:174:224,0,920:30,4:54,7	Translocation	Heterozygous	P0_N2_treated_hermaphrodite	16659005	X	0	0	0	0	0	rep.4	58111353	2	T	0		LONGPAL3	CELE46A
144219	I	5185162	MantaINS:125:0:0:0:0:0	T	TATCGAAAAAATACGATCGCACAAATTTCTCATAATTTATTTTTGATCTACCTTGTTGACTAGGCTCCTCCCCTTCCTTCGAGACAGCCACAACAAAATAACAACGGCAACAAGATTGGGGCGGAGTCAAGTTCAACAGGTAGATCAAAAATTAATTATGATAAATTTGTGCGATCGTATTTTTTCGATAATA	999	PASS	END=5185162;SVTYPE=INS;SVLEN=192;CIGAR=1M192I;CIPOS=0,8;HOMLEN=8;HOMSEQ=ATCGAAAA	GT:FT:GQ:PL:PR:SR	1/1:PASS:174:999,177,0:0,15:0,52	Insertion	Homozygous	P0_N2_treated_hermaphrodite	5185162	I	8	0	8	0	0	rep.4	58111353			8
144219	I	5185170	MantaBND:125:0:2:0:0:0:0	A	AAATACGATCGCACAAAT]IV:10079368]	782	PASS	SVTYPE=BND;MATEID=MantaBND:125:0:2:0:0:0:1;SVINSLEN=17;SVINSSEQ=AATACGATCGCACAAAT;BND_DEPTH=125;MATE_BND_DEPTH=58	GT:FT:GQ:PL:PR:SR	0/1:PASS:650:832,0,647:26,3:43,25	Translocation	Heterozygous	P0_N2_treated_hermaphrodite	10079368	IV	0	0	0	0	0	rep.4	58111353	2	AATACGATCGCACAAAT	0			TIR54TA1_CE
144219	I	6521294	MantaINS:158:0:0:0:0:0	A	AGATCGAAACAATTATTGGAAATGTATTAAATGAAATGAAATCAGAATTGCATTTAGGGGGTAGTAGTCGCATCTTTAGTCAGATTATTCAGATATAGTATGAAGTTTTTAGATAATAAATCAATTCTTTCAGACGTTTCTTGTGGAGTGGGCATCATTTATTTTGGCCAAAACGTTTTCTCACTCACACGAAAGAATAGGAACAAACTGTGCAAATCCAATAGATTCTTGTT	999	PASS	END=6521294;SVTYPE=INS;SVLEN=232;CIGAR=1M232I;CIPOS=0,5;HOMLEN=5;HOMSEQ=GATCG	GT:FT:GQ:PL:PR:SR	1/1:PASS:151:999,154,0:0,1:0,66	Insertion	Homozygous	P0_N2_treated_hermaphrodite	6521294	I	5	0	5	0	0	rep.4	58111353			5
144219	I	8454802	MantaINS:198:0:0:0:3:0	T	<INS>	999	PASS	END=8454802;SVTYPE=INS;LEFT_SVINSSEQ=TAGGTGATTGGTAGGTTAGATATTACATATAGGGGGGGGGGGGGGGCATTGAAAGAATTATCTTTTCGATTGGCGTAATTTTTTT;RIGHT_SVINSSEQ=CAAGAACCCTCATTACGGGAACGTCGCAAAGTCAAATAGTTGGCAAAGTGGAGAGACGGCAGACATGACGTGGCACCAACCAGCGAAAACACGCAAACGGCGATGATCCGGAAATGGCAGAAAAAAACGAC	GT:FT:GQ:PL:PR:SR	1/1:PASS:113:999,116,0:0,0:0,46	Insertion	Homozygous	P0_N2_treated_hermaphrodite	8454802	I	0	0	0	0	0	rep.4	58111353			0
144219	I	8660543	MantaBND:199:0:0:0:0:0:1	C	C]I:8660487]	370	PASS	SVTYPE=BND;MATEID=MantaBND:199:0:0:0:0:0:0;IMPRECISE;CIPOS=-238,239;BND_DEPTH=72;MATE_BND_DEPTH=114	GT:FT:GQ:PL:PR	0/1:PASS:226:420,0,223:19,25	Translocation	Heterozygous	P0_N2_treated_hermaphrodite	8660487	I	0	-238	239	0	0	rep.4	58111353	2		239	x
144219	I	11511624	MantaBND:81:1:6:0:0:0:1	A	A]IV:17326147]	44	PASS	SVTYPE=BND;MATEID=MantaBND:81:1:6:0:0:0:0;IMPRECISE;CIPOS=-278,278;BND_DEPTH=73;MATE_BND_DEPTH=70	GT:FT:GQ:PL:PR	0/1:PASS:44:94,0,518:35,10	Translocation	Heterozygous	P0_N2_treated_hermaphrodite	17326147	IV	0	-278	278	0	0	rep.4	58111353	2		278	x	HAT3_CE	PALTTAA3_CE
144219	I	11630178	MantaBND:247:0:1:0:0:0:1	T	T]V:2701115]	77	PASS	SVTYPE=BND;MATEID=MantaBND:247:0:1:0:0:0:0;IMPRECISE;CIPOS=-209,209;BND_DEPTH=54;MATE_BND_DEPTH=49	GT:FT:GQ:PL:PR	0/1:PASS:77:127,0,663:45,16	Translocation	Heterozygous	P0_N2_treated_hermaphrodite	2701115	V	0	-209	209	0	0	rep.4	58111353	2		209	x		HAT1_CE
144219	I	11713576	MantaBND:245:0:1:0:0:0:1	A	A]X:1887948]	216	PASS	SVTYPE=BND;MATEID=MantaBND:245:0:1:0:0:0:0;BND_DEPTH=88;MATE_BND_DEPTH=85	GT:FT:GQ:PL:PR:SR	0/1:PASS:216:266,0,999:42,9:74,20	Translocation	Heterozygous	P0_N2_treated_hermaphrodite	1887948	X	0	0	0	0	0	rep.4	58111353	2		0	x
144219	I	12738722	MantaINS:262:0:0:0:0:0	A	AATCCTTATGATCCTCATCTGGGTAGCCTAGGATAAACATCGGAACGGGAGGATCTGCTTCAAAGATCTTTGGGATCCTCGGCCATACCACTTGAGCTATGAATCTTCAGAAAGATCTGTAGGATCCAGGGGCTACGATCTTCATGGCAAGCTAGGATCCTGAACTAGGTCACTCCCGCTCCTCCAGAATTTTCACTAGGAAAACCAGGTTCCGAAGATCCGTGGAATCTTATGAAGCTGCTCTTCAATCTCTTCAATCAGTATGGGTGATGCTGATGCTGAAGATCTGATAATTGACAGAGG	999	PASS	END=12738722;SVTYPE=INS;SVLEN=302;CIGAR=1M302I;CIPOS=0,19;HOMLEN=19;HOMSEQ=ATCCTTATGATCCTCATCT	GT:FT:GQ:PL:PR:SR	1/1:PASS:136:999,139,0:0,4:0,52	Insertion	Homozygous	P0_N2_treated_hermaphrodite	12738722	I	19	0	19	0	0	rep.4	58111353			19
144219	I	14340151	MantaBND:301:0:1:0:0:0:0	C	[V:4248555[C	999	PASS	SVTYPE=BND;MATEID=MantaBND:301:0:1:0:0:0:1;CIPOS=0,1;HOMLEN=1;HOMSEQ=G;BND_DEPTH=40;MATE_BND_DEPTH=58	GT:FT:GQ:PL:PR:SR	1/1:PASS:71:999,74,0:1,6:0,31	Translocation	Homozygous	P0_N2_treated_hermaphrodite	4248555	V	1	0	1	0	0	rep.4	58111353	4		1	x
144219	I	14340289	MantaBND:301:1:2:0:0:0:1	C	C]V:4248552]	554	PASS	SVTYPE=BND;MATEID=MantaBND:301:1:2:0:0:0:0;CIPOS=0,7;HOMLEN=7;HOMSEQ=GCAGTGC;BND_DEPTH=34;MATE_BND_DEPTH=58	GT:FT:GQ:PL:PR:SR	0/1:PASS:203:604,0,200:9,5:17,14	Translocation	Heterozygous	P0_N2_treated_hermaphrodite	4248552	V	7	0	7	0	0	rep.4	58111353	2		7	x
144219	I	14425428	MantaDEL:303:0:0:0:0:0	CAGCAATTTTGCCTAATTTAGACTACAAACTACAGTTATTTGCAATTTGGCACAGTCTGTCTTGATTACTATAATGCAGTAGCAGTAGTCGAAATTTCAAAAAAAATCGCCAAATTCGAATTCAATTTTCTGAGAAAATTCTAATTTTCCTGTTAGATATGTTTTGGGCTCTGCTGATCTGTTGGAAAATGCAAAAAATTCGGTGAAAATCTGTTGAAAACTAGGAATTTAGACTAAATTGACGATTGGTTGAGGCTATCGGACTACAAAC	CTATATTTGGAGCTA	999	PASS	END=14425698;SVTYPE=DEL;SVLEN=-270;CIGAR=1M14I270D	GT:FT:GQ:PL:PR:SR	1/1:PASS:68:999,71,0:0,6:0,26	Deletion	Homozygous	P0_N2_treated_hermaphrodite	14425698	I	0	0	0	0	0	rep.4	58111353			0
144219	I	14632266	MantaDEL:314:0:1:0:0:0	ATGCGTCCGGTTGGGGGTAGCTATCCACGACGGCCGACAATTTCCGAATTTCGCCACTCACTATAAAATTGCTGATTAAGTATAGTGAGTGGCGAAACTCGGAAGTTGTCGGCCGTCGTGGATAGCTACCCCCAACCGGACGCATG	A	72	PASS	END=14632411;SVTYPE=DEL;SVLEN=-145;CIGAR=1M145D;CIPOS=0,10;HOMLEN=10;HOMSEQ=TGCGTCCGGT	GT:FT:GQ:PL:PR:SR	0/1:PASS:72:122,0,594:16,0:41,12	Deletion	Heterozygous	P0_N2_treated_hermaphrodite	14632411	I	10	0	10	0	0	rep.4	58111353			10
144219	II	1450659	MantaBND:335:0:1:0:0:0:1	G	G]II:1455949]	83	PASS	SVTYPE=BND;MATEID=MantaBND:335:0:1:0:0:0:0;IMPRECISE;CIPOS=-299,300;BND_DEPTH=85;MATE_BND_DEPTH=111	GT:FT:GQ:PL:PR	0/1:PASS:83:133,0,329:23,11	Translocation	Heterozygous	P0_N2_treated_hermaphrodite	1455949	II	0	-299	300	0	0	rep.4	58111353	2		300	x
144219	II	1454792	MantaDEL:335:3:3:5:0:0	CCGGTTCTATTTTTTCCGTGAGTAGATTTTTCCGCCGGTTCAATTATTCCGCCGGTTCGAGTTTTTCCGCAGATAGATTTTTTCCGCCGGTTCAATTTTTTCCGCCGGTTCTATTTTTTCCGTGAGTAGATTTTTCCGCCGGTTCAATTATTCCGCCGGTTCGAGTTTTTCCGCAGATAGATTTTTTCCGCCGGTTCAATTTTTCCGCCGGTTCG	CAGATAT	445	PASS	END=1455006;SVTYPE=DEL;SVLEN=-214;CIGAR=1M6I214D	GT:FT:GQ:PL:PR:SR	0/1:PASS:445:495,0,764:8,3:80,18	Deletion	Heterozygous	P0_N2_treated_hermaphrodite	1455006	II	0	0	0	0	0	rep.4	58111353			0
144219	II	1455949	MantaBND:335:0:1:0:0:0:0	T	T]II:1450659]	83	PASS	SVTYPE=BND;MATEID=MantaBND:335:0:1:0:0:0:1;IMPRECISE;CIPOS=-210,211;BND_DEPTH=111;MATE_BND_DEPTH=85	GT:FT:GQ:PL:PR	0/1:PASS:83:133,0,329:23,11	Translocation	Heterozygous	P0_N2_treated_hermaphrodite	1450659	II	0	-210	211	0	0	rep.4	58111353	2		211	x
144219	II	1531333	MantaDEL:349:0:0:0:0:0	TCGAAAATTTCAAAAAATTTTTACCACATTTTTATTGTTAATTTCCAGAATTTTTCTCATTTTTTTTCCAAGTTTACTCATTTTACTACATCCTTCAAAATTTTCAACCCCATAGTTCAACTCCCAAGACTTTTATAAAAC	TAATTTTTT	999	PASS	END=1531473;SVTYPE=DEL;SVLEN=-140;CIGAR=1M8I140D	GT:FT:GQ:PL:PR:SR	1/1:PASS:89:999,92,0:0,0:0,35	Deletion	Homozygous	P0_N2_treated_hermaphrodite	1531473	II	0	0	0	0	0	rep.4	58111353			0
144219	II	2141116	MantaINS:363:0:0:0:2:0	A	<INS>	999	PASS	END=2141116;SVTYPE=INS;CIPOS=0,12;CIEND=0,12;HOMLEN=12;HOMSEQ=TTAACAAGGAAA;LEFT_SVINSSEQ=TTAACAAGGAAAGTAAGTCAATCTAGTCCCGGACTTTAAATCGAGACGTATGTCATTTGAAAATTTATGTTTAGACTAGATCACCACTAAAATTTCAGCGGCGGAACTCAACTCTGAACCCCTGAAATTGCCATCTGAAAGTGCTCTAGTGCATTTTTTCGCTGAATTCTAGGT;RIGHT_SVINSSEQ=GATTTAAAGTCCGGGACTAGATTGACTTACTTTCCTTGTAAGGTCATTTGAGATGAGAATATAAAAATTACATACGTTATTCAATGTTTTCAG	GT:FT:GQ:PL:PR:SR	1/1:PASS:172:999,175,0:0,3:0,62	Insertion	Homozygous	P0_N2_treated_hermaphrodite	2141116	II	12	0	12	0	12	rep.4	58111353			12
144219	II	2141116	MantaBND:363:0:1:0:0:0:0	A	A[V:686153[	999	PASS	SVTYPE=BND;MATEID=MantaBND:363:0:1:0:0:0:1;CIPOS=0,12;HOMLEN=12;HOMSEQ=TTAACAAGGAAA;BND_DEPTH=100;MATE_BND_DEPTH=133	GT:FT:GQ:PL:PR:SR	0/1:PASS:421:999,0,418:17,14:26,38	Translocation	Heterozygous	P0_N2_treated_hermaphrodite	686153	V	12	0	12	0	0	rep.4	58111353	1		12	x
144219	II	2818716	MantaINS:378:0:0:0:0:0	A	AGCGCTCAAAGATTGGGCGCGAGAGAGCGCGGGGAAGGGGAGACGCAGAGCGCCTCGCGCGCCTGCGTCTCCCCTTCCACCGCACTCTCTC	999	PASS	END=2818716;SVTYPE=INS;SVLEN=90;CIGAR=1M90I;CIPOS=0,4;HOMLEN=4;HOMSEQ=GCGC	GT:FT:GQ:PL:PR:SR	1/1:PASS:104:999,107,0:0,0:0,47	Insertion	Homozygous	P0_N2_treated_hermaphrodite	2818716	II	4	0	4	0	0	rep.4	58111353			4
144219	II	2897567	MantaDUP:TANDEM:372:0:1:0:0:0	G	<DUP:TANDEM>	843	PASS	END=2898963;SVTYPE=DUP;SVLEN=1396;CIPOS=0,24;CIEND=0,24;HOMLEN=24;HOMSEQ=TAGTCCTAAAATTGTGATTTTTAG	GT:FT:GQ:PL:PR:SR	0/1:PASS:601:893,0,598:21,16:49,26	Tandem Duplication	Heterozygous	P0_N2_treated_hermaphrodite	2898963	II	24	0	24	0	24	rep.4	58111353			24
144219	II	3539921	MantaINS:405:0:0:0:2:0	G	<INS>	999	PASS	END=3539921;SVTYPE=INS;CIPOS=0,18;CIEND=0,18;HOMLEN=18;HOMSEQ=AATTTTCCAATTTTCTCT;LEFT_SVINSSEQ=AATTTTCCAATTTTCTCTTTAAAAAAATACCGGAAAATTCGAAAAAATATCCGATTTTTTCGAAAAAAGTCAGATTTTTCC;RIGHT_SVINSSEQ=AAAATATCCGATTTTTTCGAAAAAAGTCAGATTTTTCCTTCTGTTTTTCCGACATTTTTTTAAAGAGAAAATCTGAAAATTTTGTGAAAAATAGGATATTTTTCTTTACTTTTTAAGGAAAAATATCAGATTTTCCACTA	GT:FT:GQ:PL:PR:SR	1/1:PASS:108:999,111,0:0,0:0,46	Insertion	Homozygous	P0_N2_treated_hermaphrodite	3539921	II	18	0	18	0	18	rep.4	58111353			18
144219	II	3833797	MantaINS:418:0:0:1:0:1	ACG	ATGGCTAGTTTAGGGGTGACAGGCAAACGATTTTTTCCGGCAAATCAGCAAACCGGCAATTTGCCGAATTTGCCGGAAAAAACTCAATTGCCGTCCACTCCTGTGATAGTGGATGGTTGT	999	PASS	END=3833799;SVTYPE=INS;SVLEN=119;CIGAR=1M119I2D	GT:FT:GQ:PL:PR:SR	0/1:PASS:562:999,0,559:1,2:48,36	Insertion	Heterozygous	P0_N2_treated_hermaphrodite	3833799	II	0	0	0	0	0	rep.4	58111353			0
144219	II	3834811	MantaDEL:422:0:0:0:0:0	TGCATAAATGGGCATAAATGGGCCAATGAAAAGCATAAATGGGCCAATGAAT	TAAGATATAG	999	PASS	END=3834862;SVTYPE=DEL;SVLEN=-51;CIGAR=1M9I51D	GT:FT:GQ:PL:PR:SR	0/1:PASS:667:999,0,664:10,0:54,41	Deletion	Heterozygous	P0_N2_treated_hermaphrodite	3834862	II	0	0	0	0	0	rep.4	58111353			0
144219	II	4225874	MantaBND:417:0:1:0:0:0:1	A	A]IV:2373463]	141	PASS	SVTYPE=BND;MATEID=MantaBND:417:0:1:0:0:0:0;CIPOS=0,1;HOMLEN=1;HOMSEQ=A;BND_DEPTH=60;MATE_BND_DEPTH=50	GT:FT:GQ:PL:PR:SR	0/1:PASS:141:191,0,999:36,5:68,7	Translocation	Heterozygous	P0_N2_treated_hermaphrodite	2373463	IV	1	0	1	0	0	rep.4	58111353	2		1			CeRep5
144219	II	6163864	MantaDEL:448:0:2:0:0:0	G	<DEL>	163	PASS	END=6166863;SVTYPE=DEL;SVLEN=-2999;CIPOS=0,2;CIEND=0,2;HOMLEN=2;HOMSEQ=TC	GT:FT:GQ:PL:PR:SR	0/1:PASS:163:213,0,692:24,8:47,17	Deletion	Heterozygous	P0_N2_treated_hermaphrodite	6166863	II	2	0	2	0	2	rep.4	58111353			2
144219	II	6187757	MantaBND:192:6:7:0:0:0:1	A	[X:16884759[A	858	PASS	SVTYPE=BND;MATEID=MantaBND:192:6:7:0:0:0:0;CIPOS=0,7;HOMLEN=7;HOMSEQ=TCCCGAC;BND_DEPTH=138;MATE_BND_DEPTH=139	GT:FT:GQ:PL:PR:SR	0/1:PASS:496:908,0,493:21,3:32,29	Translocation	Heterozygous	P0_N2_treated_hermaphrodite	16884759	X	7	0	7	0	0	rep.4	58111353	4		7	x	(TCCCGATCCA)n	(CGGGATGGAT)n
144219	II	6630113	MantaDUP:TANDEM:454:0:1:0:0:0	C	<DUP:TANDEM>	999	PASS	END=6630883;SVTYPE=DUP;SVLEN=770	GT:FT:GQ:PL:PR:SR	0/1:PASS:999:999,0,999:36,35:69,43	Tandem Duplication	Heterozygous	P0_N2_treated_hermaphrodite	6630883	II	0	0	0	0	0	rep.4	58111353			0
144219	II	6669184	MantaINS:459:0:0:0:4:0	T	<INS>	999	PASS	END=6669184;SVTYPE=INS;CIPOS=0,6;CIEND=0,6;HOMLEN=6;HOMSEQ=CATTTC;LEFT_SVINSSEQ=CATTTCCGATGCATTTAATATTATTCCGAATAATACCAGAGTTGGACCACCAGGATTTGTTATCCTGATTGCAAATTCGTGAGTGTTCGCCATGATCACTGTTTCAGAAATTCAATTTTCAGCGCTGATTCGGTTCCAACTTCTGTGAATTCCGCTGTGAATTTGAAAGCTCAAGGGTTTGAAATTGTCACAGTTGGATTTAAATCAGCTGGAGATTTTACCTCGTTGTCATCACAGCCTGGTTTCAACTTCAAAATTCATCAGGACGGTGATATGAGTTCTGTTGCTGCATTG;RIGHT_SVINSSEQ=CACTTGTCC…	GT:FT:GQ:PL:PR:SR	1/1:PASS:201:999,204,0:0,4:0,76	Insertion	Homozygous	P0_N2_treated_hermaphrodite	6669184	II	6	0	6	0	6	rep.4	58111353			6
144219	II	10122121	MantaDUP:TANDEM:513:0:1:0:0:0	A	<DUP:TANDEM>	821	PASS	END=10122290;SVTYPE=DUP;SVLEN=169;CIPOS=0,28;CIEND=0,28;HOMLEN=28;HOMSEQ=TTCTTCCAAACCAAACACCCAATTTTTT	GT:FT:GQ:PL:PR:SR	0/1:PASS:821:871,0,875:27,8:77,41	Tandem Duplication	Heterozygous	P0_N2_treated_hermaphrodite	10122290	II	28	0	28	0	28	rep.4	58111353			28
144219	II	11027622	MantaDUP:TANDEM:523:0:1:0:0:0	C	<DUP:TANDEM>	323	PASS	END=11027691;SVTYPE=DUP;SVLEN=69;SVINSLEN=3;SVINSSEQ=AGT	GT:FT:GQ:PL:PR:SR	0/1:PASS:323:373,0,345:8,4:35,18	Tandem Duplication	Heterozygous	P0_N2_treated_hermaphrodite	11027691	II	0	0	0	0	0	rep.4	58111353			0
144219	II	11027640	MantaINS:523:1:1:0:0:0	C	CCGTGAAGATCGCCGTGACCGAAGCAAGGATCGGGAGGATCGTCGTGATCGCAGTAAGGATCGAGACGATCGT	999	PASS	END=11027640;SVTYPE=INS;SVLEN=72;CIGAR=1M72I;CIPOS=0,32;HOMLEN=32;HOMSEQ=CGTGAAGATCGCCGTGACCGAAGCAAGGATCG	GT:FT:GQ:PL:PR:SR	1/1:PASS:165:999,168,0:0,0:0,70	Insertion	Homozygous	P0_N2_treated_hermaphrodite	11027640	II	32	0	32	0	0	rep.4	58111353			32
144219	II	11090411	MantaDEL:524:0:1:0:0:0	GTTGAGGTTACCAGAAACTGGTAAAAATTTCTGATGAGGATTTGAACAATTTTCAGTTTTATAGAAAATTTTCATATGTTTTTGGAAACGCTCTGAAACGCTGGCTTACTAGGGATTTTTGTAACTGTGCGGTAGCTGAAATTTCGGGTTTTCAGAATCTACAATTTGTTCTAGCAAAATATCCCTGTGAGTCTGGAAATTTTAATTTGAAAAAAAACTATTCTCAGAAACTATACTCTATTGATGCTGATAAAATACAGTGTACACTGAATAATTTTGACGTGGCACAAGACTCTGCAATTAAAAATCACATTTAACAATGTGATTTTTAATCTCTACAGCTCTAGCTGATGGTATCATGGTATTAACAATACTTTGCCAAAATTGAAAACTCAACTA…	G	56	PASS	END=11091141;SVTYPE=DEL;SVLEN=-730;CIGAR=1M730D;CIPOS=0,2;HOMLEN=2;HOMSEQ=TT	GT:FT:GQ:PL:PR:SR	0/1:PASS:56:106,0,999:43,4:63,5	Deletion	Heterozygous	P0_N2_treated_hermaphrodite	11091141	II	2	0	2	0	0	rep.4	58111353			2
144219	II	11211578	MantaDUP:TANDEM:527:0:0:1:0:0	C	<DUP:TANDEM>	27	PASS	END=11212178;SVTYPE=DUP;SVLEN=600;IMPRECISE;CIPOS=-292,293;CIEND=-264,265	GT:FT:GQ:PL:PR	0/1:PASS:27:77,0,510:35,12	Tandem Duplication	Heterozygous	P0_N2_treated_hermaphrodite	11212178	II	0	-292	293	-264	265	rep.4	58111353			293
144219	II	11704655	MantaINS:537:0:0:0:0:0	G	GTTTTTTCAAATGTGCCTCCGTGGAGAAAACCATCTGAAATGTTAAAAAAATTATGTTTTT	999	PASS	END=11704655;SVTYPE=INS;SVLEN=60;CIGAR=1M60I;CIPOS=0,9;HOMLEN=9;HOMSEQ=TTTTTTCAA	GT:FT:GQ:PL:PR:SR	1/1:PASS:121:999,124,0:0,0:0,57	Insertion	Homozygous	P0_N2_treated_hermaphrodite	11704655	II	9	0	9	0	0	rep.4	58111353			9
144219	II	13583084	MantaDUP:TANDEM:567:0:0:0:0:0	C	<DUP:TANDEM>	999	PASS	END=13583647;SVTYPE=DUP;SVLEN=563;SVINSLEN=1;SVINSSEQ=T	GT:FT:GQ:PL:PR:SR	0/1:PASS:776:999,0,773:42,21:56,26	Tandem Duplication	Heterozygous	P0_N2_treated_hermaphrodite	13583647	II	0	0	0	0	0	rep.4	58111353			0
144219	II	13870622	MantaDUP:TANDEM:575:0:1:0:0:0	C	<DUP:TANDEM>	825	PASS	END=13871114;SVTYPE=DUP;SVLEN=492;CIPOS=0,30;CIEND=0,30;HOMLEN=30;HOMSEQ=GATTTTTAGGCAGTTTTTTTCACAATTTTC	GT:FT:GQ:PL:PR:SR	0/1:PASS:746:875,0,743:37,14:46,28	Tandem Duplication	Heterozygous	P0_N2_treated_hermaphrodite	13871114	II	30	0	30	0	30	rep.4	58111353			30
144219	II	15049162	MantaBND:584:0:1:0:0:0:1	T	[II:15049584[T	999	PASS	SVTYPE=BND;MATEID=MantaBND:584:0:1:0:0:0:0;CIPOS=0,14;HOMLEN=14;HOMSEQ=TAGACAACTTTTTA;BND_DEPTH=88;MATE_BND_DEPTH=115	GT:FT:GQ:PL:PR:SR	0/1:PASS:999:999,0,999:40,6:71,35	Translocation	Heterozygous	P0_N2_treated_hermaphrodite	15049584	II	14	0	14	0	0	rep.4	58111353	4		14
144219	II	15049557	MantaBND:584:1:1:0:0:0:0	T	T]II:15050142]	999	PASS	SVTYPE=BND;MATEID=MantaBND:584:1:1:0:0:0:1;CIPOS=0,2;HOMLEN=2;HOMSEQ=TT;BND_DEPTH=115;MATE_BND_DEPTH=85	GT:FT:GQ:PL:PR:SR	0/1:PASS:999:999,0,999:28,12:67,36	Translocation	Heterozygous	P0_N2_treated_hermaphrodite	15050142	II	2	0	2	0	0	rep.4	58111353	2		2	x		LONGPAL3
144219	II	15049570	MantaBND:584:0:1:0:0:0:0	A	[II:15049176[A	999	PASS	SVTYPE=BND;MATEID=MantaBND:584:0:1:0:0:0:1;CIPOS=0,14;HOMLEN=14;HOMSEQ=AAAAGTTGTCTAAT;BND_DEPTH=115;MATE_BND_DEPTH=88	GT:FT:GQ:PL:PR:SR	0/1:PASS:999:999,0,999:40,6:71,35	Translocation	Heterozygous	P0_N2_treated_hermaphrodite	15049176	II	14	0	14	0	0	rep.4	58111353	4		14
144219	II	15050140	MantaBND:584:1:1:0:0:0:1	A	A]II:15049559]	999	PASS	SVTYPE=BND;MATEID=MantaBND:584:1:1:0:0:0:0;CIPOS=0,2;HOMLEN=2;HOMSEQ=AA;BND_DEPTH=85;MATE_BND_DEPTH=115	GT:FT:GQ:PL:PR:SR	0/1:PASS:999:999,0,999:28,12:67,36	Translocation	Heterozygous	P0_N2_treated_hermaphrodite	15049559	II	2	0	2	0	0	rep.4	58111353	2		2	x	LONGPAL3
144219	III	55714	MantaBND:277:3:4:0:0:0:1	A	]V:12864683]A	999	PASS	SVTYPE=BND;MATEID=MantaBND:277:3:4:0:0:0:0;BND_DEPTH=92;MATE_BND_DEPTH=42	GT:FT:GQ:PL:PR:SR	0/1:PASS:470:999,0,467:9,9:37,29	Translocation	Heterozygous	P0_N2_treated_hermaphrodite	12864683	V	0	0	0	0	0	rep.4	58111353	3		0
144219	III	467776	MantaBND:62:1:4:0:0:0:0	T	[V:18995437[T	723	PASS	SVTYPE=BND;MATEID=MantaBND:62:1:4:0:0:0:1;CIPOS=0,2;HOMLEN=2;HOMSEQ=GT;BND_DEPTH=105;MATE_BND_DEPTH=44	GT:FT:GQ:PL:PR:SR	0/1:PASS:723:773,0,909:37,4:58,20	Translocation	Heterozygous	P0_N2_treated_hermaphrodite	18995437	V	2	0	2	0	0	rep.4	58111353	4		2		PAL8D_CE	PAL5A_CE
144219	III	468056	MantaBND:62:0:1:0:0:0:0	G	G[I:2002703[	793	PASS	SVTYPE=BND;MATEID=MantaBND:62:0:1:0:0:0:1;BND_DEPTH=117;MATE_BND_DEPTH=47	GT:FT:GQ:PL:PR:SR	0/1:PASS:793:843,0,999:41,3:69,25	Translocation	Heterozygous	P0_N2_treated_hermaphrodite	2002703	I	0	0	0	0	0	rep.4	58111353	1		0	x	CEMUDR1	PAL5A_CE
144219	III	478140	MantaINS:594:0:0:0:1:0	T	TTAGCAGACCAAAGTTGGGTATGCTAAATATTTAGCAGACCAATGTTGGGTATGCTAAATATG	24	PASS	END=478140;SVTYPE=INS;SVLEN=62;CIGAR=1M62I;CIPOS=0,21;HOMLEN=21;HOMSEQ=TAGCAGACCAAAGTTGGGTAT	GT:FT:GQ:PL:PR:SR	0/1:PASS:24:74,0,213:0,0:12,3	Insertion	Heterozygous	P0_N2_treated_hermaphrodite	478140	III	21	0	21	0	0	rep.4	58111353			21
144219	III	639593	MantaINS:604:0:0:0:0:0	T	TAGCAGACCAACTGTGGGTCTGCTAAATATTTAGCAGACCAACTATGGGTCTGCTAAATATTTAGCAGACCAACTATGGGTCTGCTAAATATTCAGCAGACCAACTGTGGGTCTGCTAAATATTTAGCATACCTATCGTGGGTCTGCTAAATATTTAGCAGACCAACTGTGGGTCTGCTAAATATTTAGCAGACCAACTATGGGTCTGCTAGATATTC	976	PASS	END=639593;SVTYPE=INS;SVLEN=217;CIGAR=1M217I;CIPOS=0,61;HOMLEN=61;HOMSEQ=AGCAGACCAACTGTGGGTCTGCTAAATATTTAGCAGACCAACTATGGGTCTGCTAAATATT	GT:FT:GQ:PL:PR:SR	1/1:PASS:61:999,64,0:0,0:0,25	Insertion	Homozygous	P0_N2_treated_hermaphrodite	639593	III	61	0	61	0	0	rep.4	58111353			61
144219	III	1881145	MantaBND:69:22:27:0:0:0:1	C	C]X:5283391]	51	PASS	SVTYPE=BND;MATEID=MantaBND:69:22:27:0:0:0:0;CIPOS=0,1;HOMLEN=1;HOMSEQ=T;BND_DEPTH=107;MATE_BND_DEPTH=112	GT:FT:GQ:PL:PR:SR	0/1:PASS:51:101,0,713:10,3:54,10	Translocation	Heterozygous	P0_N2_treated_hermaphrodite	5283391	X	1	0	1	0	0	rep.4	58111353	2		1		(TC)n
144219	III	2261463	MantaINS:633:0:0:0:0:0	T	TAAAAATGGGGAATTAGAGTGCGAAGTTAAAGGTGGAGTAGCGTCAGTGTGGA	999	PASS	END=2261463;SVTYPE=INS;SVLEN=52;CIGAR=1M52I;CIPOS=0,2;HOMLEN=2;HOMSEQ=AA	GT:FT:GQ:PL:PR:SR	1/1:PASS:136:999,139,0:0,0:0,51	Insertion	Homozygous	P0_N2_treated_hermaphrodite	2261463	III	2	0	2	0	0	rep.4	58111353			2
144219	III	2514165	MantaINS:40:34:34:0:3:0	A	<INS>	999	PASS	END=2514165;SVTYPE=INS;CIPOS=0,10;CIEND=0,10;HOMLEN=10;HOMSEQ=ACTTTTCCTC;LEFT_SVINSSEQ=ACTTTTCCTCACGAGGGACGAGGAAAAGTGGTTTCTAGGCCATGGTCGAGGGGCCGACAAGTTTCATCGGCCATTTATCTTGCTTTGTTTTCCGCCTGTTTTCTTTCGTTTTTCATCGATTTTTTTTCGTTTTTTCTTAATAAAACTGATAAATAAATATTTTTTGCAGATGCTAAAAC;RIGHT_SVINSSEQ=ACTCAAAACTTTTTCAGCGGTCTCGTTATGAAAATCAGGTAATTTCAGCATTAAAGCAGCATATGTATCATGTTTCAGAAAAAGTTTAGGTTTTGTATTCCCGTAATCCATCATATT…	GT:FT:GQ:PL:PR:SR	1/1:PASS:104:999,107,0:0,13:1,30	Insertion	Homozygous	P0_N2_treated_hermaphrodite	2514165	III	10	0	10	0	10	rep.4	58111353			10
144219	III	2893360	MantaINS:653:0:0:0:3:0	A	<INS>	999	PASS	END=2893360;SVTYPE=INS;CIPOS=0,4;CIEND=0,4;HOMLEN=4;HOMSEQ=GATC;LEFT_SVINSSEQ=GATCAGAAAACATAGAGACGGGGCGTTTGAAAGTTCAAAAAACGTAACTAGAAAAATTTTAAAAATTAAAAAAAAAAACGATTTTGAGGGAATTTTTGGCCAACTTTCTAAAAATTTAATTAGTAATTCTATATAAATTCCAGAAAAAAAATTGACGATGAGGAAATGAGCCGAAAATTTGTAAGCTATTGTTTCGTTGACTCTTTTCAGACAGTTTCCCCATGGAAACCTAAAATTGAAGACAATTTGATCTTTTGCAATAAAT;RIGHT_SVINSSEQ=GATTTTTTATTTTCCCCGTGACAAACCAACATGAACTTGT…	GT:FT:GQ:PL:PR:SR	1/1:PASS:139:999,142,0:0,4:0,56	Insertion	Homozygous	P0_N2_treated_hermaphrodite	2893360	III	4	0	4	0	4	rep.4	58111353			4
144219	III	2950853	MantaBND:649:0:0:6:0:0:0	A	[III:2950917[A	64	PASS	SVTYPE=BND;MATEID=MantaBND:649:0:0:6:0:0:1;IMPRECISE;CIPOS=-184,184;BND_DEPTH=55;MATE_BND_DEPTH=101	GT:FT:GQ:PL:PR	0/1:PASS:64:114,0,330:23,9	Translocation	Heterozygous	P0_N2_treated_hermaphrodite	2950917	III	0	-184	184	0	0	rep.4	58111353	4		184
144219	III	2950917	MantaBND:649:0:0:6:0:0:1	T	[III:2950853[T	64	PASS	SVTYPE=BND;MATEID=MantaBND:649:0:0:6:0:0:0;IMPRECISE;CIPOS=-227,227;BND_DEPTH=101;MATE_BND_DEPTH=55	GT:FT:GQ:PL:PR	0/1:PASS:64:114,0,330:23,9	Translocation	Heterozygous	P0_N2_treated_hermaphrodite	2950853	III	0	-227	227	0	0	rep.4	58111353	4		227
144219	III	3229624	MantaBND:655:0:1:0:0:0:1	T	[III:4670588[TTTGT	669	PASS	SVTYPE=BND;MATEID=MantaBND:655:0:1:0:0:0:0;SVINSLEN=4;SVINSSEQ=TTTG;BND_DEPTH=73;MATE_BND_DEPTH=43	GT:FT:GQ:PL:PR:SR	0/1:PASS:418:719,0,415:11,3:28,25	Translocation	Heterozygous	P0_N2_treated_hermaphrodite	4670588	III	0	0	0	0	0	rep.4	58111353	4	TTTG	0
144219	III	3681028	MantaINS:678:0:0:0:2:0	T	<INS>	999	PASS	END=3681028;SVTYPE=INS;CIPOS=0,7;CIEND=0,7;HOMLEN=7;HOMSEQ=CTACATA;LEFT_SVINSSEQ=CTACATAGGCGCACAGGTAGGCATATGTAGTCTTCGCCCTTGTAGGCACACAGGTAGGCC;RIGHT_SVINSSEQ=CTTGTAGGCACACAGGTAGGCCTGTGAGTCCCCCCCCCCTGTGTGCCTACAAGGGCGAAGA	GT:FT:GQ:PL:PR:SR	1/1:PASS:77:999,80,0:0,0:0,30	Insertion	Homozygous	P0_N2_treated_hermaphrodite	3681028	III	7	0	7	0	7	rep.4	58111353			7
144219	III	4670559	MantaBND:655:1:3:0:0:0:0	C	C[IV:16571333[	441	PASS	SVTYPE=BND;MATEID=MantaBND:655:1:3:0:0:0:1;CIPOS=0,61;HOMLEN=61;HOMSEQ=CTAGGGCTGTGCAACCGGACGTCCGGTTTTTTCGGACGTCCGAAAAACCGGACGCCGGACG;BND_DEPTH=43;MATE_BND_DEPTH=85	GT:FT:GQ:PL:PR:SR	0/1:PASS:83:491,0,80:6,5:10,12	Translocation	Heterozygous	P0_N2_treated_hermaphrodite	16571333	IV	61	0	61	0	0	rep.4	58111353	1		61		CELE4
144219	III	4670588	MantaBND:655:0:1:0:0:0:0	T	[III:3229624[CAAAT	669	PASS	SVTYPE=BND;MATEID=MantaBND:655:0:1:0:0:0:1;SVINSLEN=4;SVINSSEQ=CAAA;BND_DEPTH=43;MATE_BND_DEPTH=73	GT:FT:GQ:PL:PR:SR	0/1:PASS:418:719,0,415:11,3:28,25	Translocation	Heterozygous	P0_N2_treated_hermaphrodite	3229624	III	0	0	0	0	0	rep.4	58111353	4	CAAA	0
144219	III	4670588	MantaBND:655:1:6:0:2:0:0	T	]V:20705450]T	368	PASS	SVTYPE=BND;MATEID=MantaBND:655:1:6:0:2:0:1;BND_DEPTH=43;MATE_BND_DEPTH=130	GT:FT:GQ:PL:PR:SR	0/1:PASS:319:418,0,316:0,5:28,12	Translocation	Heterozygous	P0_N2_treated_hermaphrodite	20705450	V	0	0	0	0	0	rep.4	58111353	3		0	x
144219	III	4670620	MantaBND:655:1:5:0:1:0:1	G	GCACCCAACGTCCGGTTTTTT[V:20705302[	255	PASS	SVTYPE=BND;MATEID=MantaBND:655:1:5:0:1:0:0;SVINSLEN=20;SVINSSEQ=CACCCAACGTCCGGTTTTTT;BND_DEPTH=33;MATE_BND_DEPTH=137	GT:FT:GQ:PL:PR:SR	0/1:PASS:255:305,0,459:9,1:42,14	Translocation	Heterozygous	P0_N2_treated_hermaphrodite	20705302	V	0	0	0	0	0	rep.4	58111353	1	CACCCAACGTCCGGTTTTTT	0
144219	III	4945363	MantaBND:699:0:1:0:0:0:1	A	]IV:15390261]A	45	PASS	SVTYPE=BND;MATEID=MantaBND:699:0:1:0:0:0:0;CIPOS=0,1;HOMLEN=1;HOMSEQ=A;BND_DEPTH=59;MATE_BND_DEPTH=50	GT:FT:GQ:PL:PR:SR	0/1:PASS:45:95,0,999:22,3:76,6	Translocation	Heterozygous	P0_N2_treated_hermaphrodite	15390261	IV	1	0	1	0	0	rep.4	58111353	3		1			PALTA3_CE
144219	III	4950892	MantaBND:696:0:3:0:0:0:0	G	G[IV:15386821[	613	PASS	SVTYPE=BND;MATEID=MantaBND:696:0:3:0:0:0:1;CIPOS=0,3;HOMLEN=3;HOMSEQ=TTA;BND_DEPTH=53;MATE_BND_DEPTH=66	GT:FT:GQ:PL:PR:SR	0/1:PASS:613:663,0,827:24,12:59,14	Translocation	Heterozygous	P0_N2_treated_hermaphrodite	15386821	IV	3	0	3	0	0	rep.4	58111353	1		3
144219	III	4951053	MantaBND:696:0:1:0:0:0:0	T	[III:6078862[T	410	PASS	SVTYPE=BND;MATEID=MantaBND:696:0:1:0:0:0:1;CIPOS=0,1;HOMLEN=1;HOMSEQ=C;BND_DEPTH=57;MATE_BND_DEPTH=70	GT:FT:GQ:PL:PR:SR	0/1:PASS:410:460,0,936:28,8:57,11	Translocation	Heterozygous	P0_N2_treated_hermaphrodite	6078862	III	1	0	1	0	0	rep.4	58111353	4		1		(AGGCTC)n
144219	III	5230312	MantaBND:630:2:3:0:0:0:0	T	]IV:13785478]CGCAAAAT	114	PASS	SVTYPE=BND;MATEID=MantaBND:630:2:3:0:0:0:1;SVINSLEN=7;SVINSSEQ=CGCAAAA;BND_DEPTH=61;MATE_BND_DEPTH=51	GT:FT:GQ:PL:PR:SR	0/1:PASS:114:164,0,999:27,1:58,8	Translocation	Heterozygous	P0_N2_treated_hermaphrodite	13785478	IV	0	0	0	0	0	rep.4	58111353	3	CGCAAAA	0			CELE2
144219	III	5892948	MantaBND:696:1:4:0:0:0:1	A	ATATGACCTCA]III:6078862]	75	PASS	SVTYPE=BND;MATEID=MantaBND:696:1:4:0:0:0:0;SVINSLEN=10;SVINSSEQ=TATGACCTCA;BND_DEPTH=68;MATE_BND_DEPTH=70	GT:FT:GQ:PL:PR:SR	0/1:PASS:75:125,0,999:44,5:85,12	Translocation	Heterozygous	P0_N2_treated_hermaphrodite	6078862	III	0	0	0	0	0	rep.4	58111353	2	TATGACCTCA	0
144219	III	5895749	MantaBND:714:0:1:0:0:0:1	A	ATTCCAG[X:7832195[	103	PASS	SVTYPE=BND;MATEID=MantaBND:714:0:1:0:0:0:0;SVINSLEN=6;SVINSSEQ=TTCCAG;BND_DEPTH=56;MATE_BND_DEPTH=65	GT:FT:GQ:PL:PR:SR	0/1:PASS:103:153,0,999:41,6:72,6	Translocation	Heterozygous	P0_N2_treated_hermaphrodite	7832195	X	0	0	0	0	0	rep.4	58111353	1	TTCCAG	0
144219	III	6078861	MantaBND:696:0:1:0:0:0:1	A	[III:4951054[A	410	PASS	SVTYPE=BND;MATEID=MantaBND:696:0:1:0:0:0:0;CIPOS=0,1;HOMLEN=1;HOMSEQ=A;BND_DEPTH=70;MATE_BND_DEPTH=57	GT:FT:GQ:PL:PR:SR	0/1:PASS:410:460,0,936:28,8:57,11	Translocation	Heterozygous	P0_N2_treated_hermaphrodite	4951054	III	1	0	1	0	0	rep.4	58111353	4		1			(AGGCTC)n
144219	III	6078862	MantaBND:696:1:4:0:0:0:0	A	ATGAGGTCATA]III:5892948]	75	PASS	SVTYPE=BND;MATEID=MantaBND:696:1:4:0:0:0:1;SVINSLEN=10;SVINSSEQ=TGAGGTCATA;BND_DEPTH=70;MATE_BND_DEPTH=68	GT:FT:GQ:PL:PR:SR	0/1:PASS:75:125,0,999:44,5:85,12	Translocation	Heterozygous	P0_N2_treated_hermaphrodite	5892948	III	0	0	0	0	0	rep.4	58111353	2	TGAGGTCATA	0
144219	III	7013236	MantaBND:754:0:3:0:0:0:1	A	]IV:3675213]A	436	PASS	SVTYPE=BND;MATEID=MantaBND:754:0:3:0:0:0:0;CIPOS=0,3;HOMLEN=3;HOMSEQ=ACA;BND_DEPTH=71;MATE_BND_DEPTH=63	GT:FT:GQ:PL:PR:SR	0/1:PASS:436:486,0,991:30,10:64,14	Translocation	Heterozygous	P0_N2_treated_hermaphrodite	3675213	IV	3	0	3	0	0	rep.4	58111353	3		3
144219	III	9101370	MantaBND:780:0:0:0:0:0:0	A	A]III:9101512]	176	PASS	SVTYPE=BND;MATEID=MantaBND:780:0:0:0:0:0:1;IMPRECISE;CIPOS=-327,327;BND_DEPTH=91;MATE_BND_DEPTH=84	GT:FT:GQ:PL:PR	0/1:PASS:176:226,0,435:31,18	Translocation	Heterozygous	P0_N2_treated_hermaphrodite	9101512	III	0	-327	327	0	0	rep.4	58111353	2		327	x
144219	III	9101512	MantaBND:780:0:0:0:0:0:1	A	A]III:9101370]	176	PASS	SVTYPE=BND;MATEID=MantaBND:780:0:0:0:0:0:0;IMPRECISE;CIPOS=-210,211;BND_DEPTH=84;MATE_BND_DEPTH=91	GT:FT:GQ:PL:PR	0/1:PASS:176:226,0,435:31,18	Translocation	Heterozygous	P0_N2_treated_hermaphrodite	9101370	III	0	-210	211	0	0	rep.4	58111353	2		211	x
144219	III	9938753	MantaINS:596:1:1:0:0:0	C	CTCTGCTAAATAATTAGCATACCCACATTGGGTCTGCTAAATATTTAGCATACCCACATTGGGTCTGCTAAATATTTAGCATACCCACCTTGGG	493	PASS	END=9938753;SVTYPE=INS;SVLEN=93;CIGAR=1M93I;CIPOS=0,11;HOMLEN=11;HOMSEQ=TCTGCTAAATA	GT:FT:GQ:PL:PR:SR	0/1:PASS:146:543,0,143:0,0:14,16	Insertion	Heterozygous	P0_N2_treated_hermaphrodite	9938753	III	11	0	11	0	0	rep.4	58111353			11
144219	III	9938753	MantaDUP:TANDEM:596:1:1:1:0:0	C	<DUP:TANDEM>	57	PASS	END=9938839;SVTYPE=DUP;SVLEN=86;SVINSLEN=7;SVINSSEQ=CCTTGGG	GT:FT:GQ:PL:PR:SR	0/1:PASS:57:107,0,769:8,0:56,7	Tandem Duplication	Heterozygous	P0_N2_treated_hermaphrodite	9938839	III	0	0	0	0	0	rep.4	58111353			0
144219	III	10226056	MantaINS:792:1:1:0:0:0	A	AAAAACTAAAAATAAAACTAAAAATAAAACTAAAACTAAAAATAAAACTAAAAATAAAACTAAAAATAAAACT	999	PASS	END=10226056;SVTYPE=INS;SVLEN=72;CIGAR=1M72I;CIPOS=0,54;HOMLEN=54;HOMSEQ=AAAACTAAAAATAAAACTAAAAATAAAACTAAAACTAAAAATAAAACTAAAAAT	GT:FT:GQ:PL:PR:SR	1/1:PASS:94:999,97,0:0,0:0,39	Insertion	Homozygous	P0_N2_treated_hermaphrodite	10226056	III	54	0	54	0	0	rep.4	58111353			54
144219	III	10557581	MantaINS:798:0:0:0:0:0	A	ACCGCAAGTAGATTCTTTCCGCCGGTTCGAAATTTTCCGCAAGTAGATTTTTCCGCCGGTAGATTTTTCCGGTGGTAGATTCTTTCCGCCGGTTCGAGTTTTT	999	PASS	END=10557581;SVTYPE=INS;SVLEN=102;CIGAR=1M102I;CIPOS=0,36;HOMLEN=36;HOMSEQ=CCGCAAGTAGATTCTTTCCGCCGGTTCGAAATTTTC	GT:FT:GQ:PL:PR:SR	1/1:PASS:123:999,126,0:0,0:0,47	Insertion	Homozygous	P0_N2_treated_hermaphrodite	10557581	III	36	0	36	0	0	rep.4	58111353			36
144219	III	11114137	MantaBND:812:0:1:0:0:0:1	C	[V:17040261[C	329	PASS	SVTYPE=BND;MATEID=MantaBND:812:0:1:0:0:0:0;CIPOS=0,20;HOMLEN=20;HOMSEQ=CCCCTGTTTTCAAATGGAAG;BND_DEPTH=45;MATE_BND_DEPTH=40	GT:FT:GQ:PL:PR:SR	0/1:PASS:328:379,0,335:16,9:20,8	Translocation	Heterozygous	P0_N2_treated_hermaphrodite	17040261	V	20	0	20	0	0	rep.4	58111353	4		20	x
144219	III	11114378	MantaBND:812:2:3:0:0:0:1	T	T[V:306874[	514	PASS	SVTYPE=BND;MATEID=MantaBND:812:2:3:0:0:0:0;CIPOS=0,29;HOMLEN=29;HOMSEQ=TCGCTTTTTTCACGGCCACCTCTTCCATT;BND_DEPTH=54;MATE_BND_DEPTH=26	GT:FT:GQ:PL:PR:SR	0/1:PASS:153:564,0,150:0,5:21,13	Translocation	Heterozygous	P0_N2_treated_hermaphrodite	306874	V	29	0	29	0	0	rep.4	58111353	1		29
144219	III	11114378	MantaBND:812:1:2:0:0:0:0	T	T]V:17040204]	319	PASS	SVTYPE=BND;MATEID=MantaBND:812:1:2:0:0:0:1;CIPOS=0,59;HOMLEN=59;HOMSEQ=TCGCTTTTTTCACGGCCACCTCTTCCATTTGAAAACAGGGGGGAAATTAGAAACCCGTG;BND_DEPTH=54;MATE_BND_DEPTH=32	GT:FT:GQ:PL:PR:SR	0/1:PASS:155:369,0,152:10,7:5,6	Translocation	Heterozygous	P0_N2_treated_hermaphrodite	17040204	V	59	0	59	0	0	rep.4	58111353	2		59	x		LINE2F_CE
144219	III	12376544	MantaDUP:TANDEM:836:0:0:1:0:0	C	<DUP:TANDEM>	356	PASS	END=12376674;SVTYPE=DUP;SVLEN=130;CIPOS=0,14;CIEND=0,14;HOMLEN=14;HOMSEQ=TAAAATTTCAAACG	GT:FT:GQ:PL:PR:SR	0/1:PASS:356:406,0,490:9,0:42,14	Tandem Duplication	Heterozygous	P0_N2_treated_hermaphrodite	12376674	III	14	0	14	0	14	rep.4	58111353			14
144219	III	12376545	MantaBND:836:0:1:1:0:0:1	T	[III:12627387[T	999	PASS	SVTYPE=BND;MATEID=MantaBND:836:0:1:1:0:0:0;CIPOS=0,20;HOMLEN=20;HOMSEQ=AAAATTTCAAACGAAAATTC;BND_DEPTH=71;MATE_BND_DEPTH=89	GT:FT:GQ:PL:PR:SR	0/1:PASS:371:999,0,368:12,7:30,32	Translocation	Heterozygous	P0_N2_treated_hermaphrodite	12627387	III	20	0	20	0	0	rep.4	58111353	4		20	x
144219	III	12627367	MantaBND:836:0:1:1:0:0:0	A	[III:12376565[A	999	PASS	SVTYPE=BND;MATEID=MantaBND:836:0:1:1:0:0:1;CIPOS=0,20;HOMLEN=20;HOMSEQ=ATTTTCGTTTGAAATTTTAA;BND_DEPTH=89;MATE_BND_DEPTH=71	GT:FT:GQ:PL:PR:SR	0/1:PASS:371:999,0,368:12,7:30,32	Translocation	Heterozygous	P0_N2_treated_hermaphrodite	12376565	III	20	0	20	0	0	rep.4	58111353	4		20	x
144219	IV	1236084	MantaINS:893:0:0:1:3:0	T	<INS>	999	PASS	END=1236084;SVTYPE=INS;CIPOS=0,10;CIEND=0,10;HOMLEN=10;HOMSEQ=TTGCGAAAAA;LEFT_SVINSSEQ=TTGCGAAAAAAATTGCCAATTTTTCGCAATAAACGGTAAAAAATAAATTTTATTTCGAAAAACCGCTTCAAATAAATCTTAAAATTCTTTTAAAAAATCAATAAATTATCGATTTTTGCAGAAATGTGTACAATTATACAGTTCTTTACAGTTCTTTGTTCTCCGTATTCGCGACAATTCACAAAAATAACTATTTTGTGCGAAAAATCATAAAAATTCCTTGAAAGTTTCTTTAAATCGATTTTTGAAATAAAATCTCAAATTTCGCCATTTTTATGATTTTTCGCACAAAATAGTTATTTTTGTGAATTG…	GT:FT:GQ:PL:PR:SR	1/1:PASS:128:999,131,0:0,4:0,50	Insertion	Homozygous	P0_N2_treated_hermaphrodite	1236084	IV	10	0	10	0	10	rep.4	58111353			10
144219	IV	1312645	MantaBND:131:1:2:0:0:0:1	G	G]X:216896]	999	PASS	SVTYPE=BND;MATEID=MantaBND:131:1:2:0:0:0:0;CIPOS=0,8;HOMLEN=8;HOMSEQ=AGATCAAC;BND_DEPTH=76;MATE_BND_DEPTH=49	GT:FT:GQ:PL:PR:SR	0/1:PASS:455:999,0,452:20,6:27,29	Translocation	Heterozygous	P0_N2_treated_hermaphrodite	216896	X	8	0	8	0	0	rep.4	58111353	2		8	x
144219	IV	2025941	MantaBND:923:0:3:1:0:0:1	T	[IV:2029790[T	40	PASS	SVTYPE=BND;MATEID=MantaBND:923:0:3:1:0:0:0;IMPRECISE;CIPOS=-350,350;BND_DEPTH=72;MATE_BND_DEPTH=50	GT:FT:GQ:PL:PR	0/1:PASS:40:90,0,215:15,8	Translocation	Heterozygous	P0_N2_treated_hermaphrodite	2029790	IV	0	-350	350	0	0	rep.4	58111353	4		350			PALTTAA2_CE
144219	IV	2029790	MantaBND:923:0:3:1:0:0:0	C	[IV:2025941[C	40	PASS	SVTYPE=BND;MATEID=MantaBND:923:0:3:1:0:0:1;IMPRECISE;CIPOS=-178,178;BND_DEPTH=50;MATE_BND_DEPTH=72	GT:FT:GQ:PL:PR	0/1:PASS:40:90,0,215:15,8	Translocation	Heterozygous	P0_N2_treated_hermaphrodite	2025941	IV	0	-178	178	0	0	rep.4	58111353	4		178		PALTTAA2_CE
144219	IV	2373462	MantaBND:417:0:1:0:0:0:0	G	G]II:4225875]	141	PASS	SVTYPE=BND;MATEID=MantaBND:417:0:1:0:0:0:1;CIPOS=0,1;HOMLEN=1;HOMSEQ=T;BND_DEPTH=50;MATE_BND_DEPTH=60	GT:FT:GQ:PL:PR:SR	0/1:PASS:141:191,0,999:36,5:68,7	Translocation	Heterozygous	P0_N2_treated_hermaphrodite	4225875	II	1	0	1	0	0	rep.4	58111353	2		1		CeRep5
144219	IV	3675213	MantaBND:754:0:3:0:0:0:0	C	C[III:7013236[	436	PASS	SVTYPE=BND;MATEID=MantaBND:754:0:3:0:0:0:1;CIPOS=0,3;HOMLEN=3;HOMSEQ=AAC;BND_DEPTH=63;MATE_BND_DEPTH=71	GT:FT:GQ:PL:PR:SR	0/1:PASS:436:486,0,991:30,10:64,14	Translocation	Heterozygous	P0_N2_treated_hermaphrodite	7013236	III	3	0	3	0	0	rep.4	58111353	1		3
144219	IV	3675220	MantaBND:754:3:4:0:0:0:0	T	[IV:5690569[TTTATGAACAGTACTTTTCTATT	435	PASS	SVTYPE=BND;MATEID=MantaBND:754:3:4:0:0:0:1;SVINSLEN=22;SVINSSEQ=TTTATGAACAGTACTTTTCTAT;BND_DEPTH=63;MATE_BND_DEPTH=69	GT:FT:GQ:PL:PR:SR	0/1:PASS:435:485,0,902:30,2:56,17	Translocation	Heterozygous	P0_N2_treated_hermaphrodite	5690569	IV	0	0	0	0	0	rep.4	58111353	4	TTTATGAACAGTACTTTTCTAT	0
144219	IV	4802205	MantaBND:915:1:2:0:0:0:0	A	A]IV:7292026]	85	PASS	SVTYPE=BND;MATEID=MantaBND:915:1:2:0:0:0:1;CIPOS=0,1;HOMLEN=1;HOMSEQ=T;BND_DEPTH=50;MATE_BND_DEPTH=55	GT:FT:GQ:PL:PR:SR	0/1:PASS:85:135,0,999:42,3:63,7	Translocation	Heterozygous	P0_N2_treated_hermaphrodite	7292026	IV	1	0	1	0	0	rep.4	58111353	2		1
144219	IV	4816396	MantaBND:959:0:1:0:0:0:1	A	ATCGACT[V:9724732[	872	PASS	SVTYPE=BND;MATEID=MantaBND:959:0:1:0:0:0:0;SVINSLEN=6;SVINSSEQ=TCGACT;BND_DEPTH=99;MATE_BND_DEPTH=78	GT:FT:GQ:PL:PR:SR	0/1:PASS:618:922,0,615:25,15:36,27	Translocation	Heterozygous	P0_N2_treated_hermaphrodite	9724732	V	0	0	0	0	0	rep.4	58111353	1	TCGACT	0	x	IR3_CE	CELE14B
144219	IV	5690569	MantaBND:754:3:4:0:0:0:1	T	[IV:3675220[ATAGAAAAGTACTGTTCATAAAT	435	PASS	SVTYPE=BND;MATEID=MantaBND:754:3:4:0:0:0:0;SVINSLEN=22;SVINSSEQ=ATAGAAAAGTACTGTTCATAAA;BND_DEPTH=69;MATE_BND_DEPTH=63	GT:FT:GQ:PL:PR:SR	0/1:PASS:435:485,0,902:30,2:56,17	Translocation	Heterozygous	P0_N2_treated_hermaphrodite	3675220	IV	0	0	0	0	0	rep.4	58111353	4	ATAGAAAAGTACTGTTCATAAA	0
144219	IV	5690576	MantaBND:754:4:5:0:0:0:0	C	CCACTACGGGGGGAATCAAGCCT]V:900506]	505	PASS	SVTYPE=BND;MATEID=MantaBND:754:4:5:0:0:0:1;SVINSLEN=22;SVINSSEQ=CACTACGGGGGGAATCAAGCCT;BND_DEPTH=69;MATE_BND_DEPTH=54	GT:FT:GQ:PL:PR:SR	0/1:PASS:505:555,0,643:22,4:39,13	Translocation	Heterozygous	P0_N2_treated_hermaphrodite	900506	V	0	0	0	0	0	rep.4	58111353	2	CACTACGGGGGGAATCAAGCCT	0
144219	IV	6005775	MantaBND:8:1:2:0:0:0:0	T	[V:10866443[T	163	PASS	SVTYPE=BND;MATEID=MantaBND:8:1:2:0:0:0:1;IMPRECISE;CIPOS=-262,263;BND_DEPTH=108;MATE_BND_DEPTH=118	GT:FT:GQ:PL:PR	0/1:PASS:163:213,0,999:74,22	Translocation	Heterozygous	P0_N2_treated_hermaphrodite	10866443	V	0	-262	263	0	0	rep.4	58111353	4		263
144219	IV	6320432	MantaBND:968:0:1:0:0:0:1	T	]V:4914049]TGT	999	PASS	SVTYPE=BND;MATEID=MantaBND:968:0:1:0:0:0:0;SVINSLEN=2;SVINSSEQ=TG;BND_DEPTH=78;MATE_BND_DEPTH=85	GT:FT:GQ:PL:PR:SR	0/1:PASS:124:999,0,121:9,21:17,41	Translocation	Heterozygous	P0_N2_treated_hermaphrodite	4914049	V	0	0	0	0	0	rep.4	58111353	3	TG	0	x	PALTA3_CE
144219	IV	7128227	MantaDEL:989:0:0:0:1:0	TCGTGAAAACTTCATGACAACTTCGTGACAACTTCGTGACAACTTCGGGACAACTTCGTGGCAACTTCGTGACAACTTCGGGACAACTTCGTGGAACAACTTCGTGAAACCTCATGACAACTTCGTGACAACTTCGTGACAACTTCGGGACAACTTCGTGGCAACTTCGGGACAACTTCGGGACAATTTCGGGACAACTTCGTGACAACTTCATGACAACTTCATGACAACTTCGAGACAACTTCATGACAACTTCATGACAACTTCATGATAACTTCGGGACAACTTCGGGACAACTTCGTGACAACTTCGTGACAACTTCGTGACAACTTCATGACAACTTTGTGACAACTTCATGATAACTTCGGGACAACTTCGAGACAACTTCGTGGCAACTTC…	TTGT	999	PASS	END=7128671;SVTYPE=DEL;SVLEN=-444;CIGAR=1M3I444D	GT:FT:GQ:PL:PR:SR	0/1:PASS:395:999,0,392:16,0:34,38	Deletion	Heterozygous	P0_N2_treated_hermaphrodite	7128671	IV	0	0	0	0	0	rep.4	58111353			0
144219	IV	7292025	MantaBND:915:1:2:0:0:0:1	A	A]IV:4802206]	85	PASS	SVTYPE=BND;MATEID=MantaBND:915:1:2:0:0:0:0;CIPOS=0,1;HOMLEN=1;HOMSEQ=A;BND_DEPTH=55;MATE_BND_DEPTH=50	GT:FT:GQ:PL:PR:SR	0/1:PASS:85:135,0,999:42,3:63,7	Translocation	Heterozygous	P0_N2_treated_hermaphrodite	4802206	IV	1	0	1	0	0	rep.4	58111353	2		1
144219	IV	7485251	MantaINS:987:0:0:0:3:0	A	<INS>	999	PASS	END=7485251;SVTYPE=INS;CIPOS=0,10;CIEND=0,10;HOMLEN=10;HOMSEQ=GGATCCGAAA;LEFT_SVINSSEQ=GGATCCGAAAAGTATCGAACAAGTGATGACACGTCTACAAATTAGCAAACAATGGAATACACTTCGTGCTCTACTCAACTATGTTCGTTCGAATCAAATGGATTCCATGATCCGCTCGTTCCCGCTTATTTGGTTCCGTGTTTATGAAAATGCCTTGATTGAATTGAATGGTGGATCCATGGCGAATCCAGATTGGAATTACGAACAATGCGTTATGCTTCGAAAATGGACTTTGTGGGCAATGAGCAGCAATGTCGAAGGAGGACGTCAACCAAATATTGCTCGATTCCTCCGTGAAATCAATTGTCCCAT…	GT:FT:GQ:PL:PR:SR	1/1:PASS:157:999,160,0:0,3:0,65	Insertion	Homozygous	P0_N2_treated_hermaphrodite	7485251	IV	10	0	10	0	10	rep.4	58111353			10
144219	IV	9022751	MantaBND:754:6:7:0:0:0:0	A	A[V:7491646[	567	PASS	SVTYPE=BND;MATEID=MantaBND:754:6:7:0:0:0:1;CIPOS=0,4;HOMLEN=4;HOMSEQ=TTTG;BND_DEPTH=50;MATE_BND_DEPTH=73	GT:FT:GQ:PL:PR:SR	0/1:PASS:567:617,0,777:18,8:46,17	Translocation	Heterozygous	P0_N2_treated_hermaphrodite	7491646	V	4	0	4	0	0	rep.4	58111353	1		4
144219	IV	9852302	MantaDUP:TANDEM:1031:0:1:0:0:0	T	<DUP:TANDEM>	594	PASS	END=9852492;SVTYPE=DUP;SVLEN=190;CIPOS=0,4;CIEND=0,4;HOMLEN=4;HOMSEQ=AAAT	GT:FT:GQ:PL:PR:SR	0/1:PASS:594:644,0,999:45,0:68,28	Tandem Duplication	Heterozygous	P0_N2_treated_hermaphrodite	9852492	IV	4	0	4	0	4	rep.4	58111353			4
144219	IV	10079368	MantaBND:125:0:2:0:0:0:1	A	AATTTGTGCGATCGTATT]I:5185170]	782	PASS	SVTYPE=BND;MATEID=MantaBND:125:0:2:0:0:0:0;SVINSLEN=17;SVINSSEQ=ATTTGTGCGATCGTATT;BND_DEPTH=58;MATE_BND_DEPTH=125	GT:FT:GQ:PL:PR:SR	0/1:PASS:650:832,0,647:26,3:43,25	Translocation	Heterozygous	P0_N2_treated_hermaphrodite	5185170	I	0	0	0	0	0	rep.4	58111353	2	ATTTGTGCGATCGTATT	0		TIR54TA1_CE
144219	IV	10350537	MantaBND:1040:0:0:1:0:0:0	A	[IV:10350682[A	603	PASS	SVTYPE=BND;MATEID=MantaBND:1040:0:0:1:0:0:1;BND_DEPTH=97;MATE_BND_DEPTH=118	GT:FT:GQ:PL:PR:SR	0/1:PASS:603:653,0,999:41,9:86,23	Translocation	Heterozygous	P0_N2_treated_hermaphrodite	10350682	IV	0	0	0	0	0	rep.4	58111353	4		0	x
144219	IV	10350682	MantaBND:1040:0:0:1:0:0:1	A	[IV:10350537[A	603	PASS	SVTYPE=BND;MATEID=MantaBND:1040:0:0:1:0:0:0;BND_DEPTH=118;MATE_BND_DEPTH=97	GT:FT:GQ:PL:PR:SR	0/1:PASS:603:653,0,999:41,9:86,23	Translocation	Heterozygous	P0_N2_treated_hermaphrodite	10350537	IV	0	0	0	0	0	rep.4	58111353	4		0	x
144219	IV	12688217	MantaINS:1074:0:0:0:0:0	A	AAAAAATACGATCGCACAAAAATAAACAACGACGCAACGACACTCCGCTGTTTTCAATCCCCGCCCACGATTTCATTTGCACTGCGGCCGCCACATTTCAGTGCAAATGAAATCGTGGCGAGGCTTAAAAATAGCGGAGTGTCGTTGCGTCGTTGTTTATTTTTGTGCGATCGTATTTTTTCTATAATAATT	999	PASS	END=12688217;SVTYPE=INS;SVLEN=191;CIGAR=1M191I;CIPOS=0,7;HOMLEN=7;HOMSEQ=AAAAATA	GT:FT:GQ:PL:PR:SR	1/1:PASS:98:999,101,0:0,9:0,34	Insertion	Homozygous	P0_N2_treated_hermaphrodite	12688217	IV	7	0	7	0	0	rep.4	58111353			7
144219	IV	13785478	MantaBND:630:2:3:0:0:0:1	T	TCGCAAAA[III:5230312[	114	PASS	SVTYPE=BND;MATEID=MantaBND:630:2:3:0:0:0:0;SVINSLEN=7;SVINSSEQ=CGCAAAA;BND_DEPTH=51;MATE_BND_DEPTH=61	GT:FT:GQ:PL:PR:SR	0/1:PASS:114:164,0,999:27,1:58,8	Translocation	Heterozygous	P0_N2_treated_hermaphrodite	5230312	III	0	0	0	0	0	rep.4	58111353	1	CGCAAAA	0		CELE2
144219	IV	15384992	MantaBND:135:6:7:0:0:0:0	T	T[X:2074842[	267	PASS	SVTYPE=BND;MATEID=MantaBND:135:6:7:0:0:0:1;CIPOS=0,2;HOMLEN=2;HOMSEQ=AT;BND_DEPTH=33;MATE_BND_DEPTH=65	GT:FT:GQ:PL:PR:SR	0/1:PASS:267:317,0,669:15,5:40,8	Translocation	Heterozygous	P0_N2_treated_hermaphrodite	2074842	X	2	0	2	0	0	rep.4	58111353	1		2
144219	IV	15386821	MantaBND:696:0:3:0:0:0:1	T	]III:4950892]T	613	PASS	SVTYPE=BND;MATEID=MantaBND:696:0:3:0:0:0:0;CIPOS=0,3;HOMLEN=3;HOMSEQ=TAG;BND_DEPTH=66;MATE_BND_DEPTH=53	GT:FT:GQ:PL:PR:SR	0/1:PASS:613:663,0,827:24,12:59,14	Translocation	Heterozygous	P0_N2_treated_hermaphrodite	4950892	III	3	0	3	0	0	rep.4	58111353	3		3
144219	IV	15387218	MantaBND:709:1:2:0:0:0:0	G	GAGAAA]IV:15387658]	228	PASS	SVTYPE=BND;MATEID=MantaBND:709:1:2:0:0:0:1;SVINSLEN=5;SVINSSEQ=AGAAA;BND_DEPTH=63;MATE_BND_DEPTH=49	GT:FT:GQ:PL:PR:SR	0/1:PASS:228:278,0,999:44,5:84,8	Translocation	Heterozygous	P0_N2_treated_hermaphrodite	15387658	IV	0	0	0	0	0	rep.4	58111353	2	AGAAA	0
144219	IV	15387658	MantaBND:709:1:2:0:0:0:1	T	TTTTCT]IV:15387218]	228	PASS	SVTYPE=BND;MATEID=MantaBND:709:1:2:0:0:0:0;SVINSLEN=5;SVINSSEQ=TTTCT;BND_DEPTH=49;MATE_BND_DEPTH=63	GT:FT:GQ:PL:PR:SR	0/1:PASS:228:278,0,999:44,5:84,8	Translocation	Heterozygous	P0_N2_treated_hermaphrodite	15387218	IV	0	0	0	0	0	rep.4	58111353	2	TTTCT	0
144219	IV	15390261	MantaBND:699:0:1:0:0:0:0	C	C[III:4945363[	45	PASS	SVTYPE=BND;MATEID=MantaBND:699:0:1:0:0:0:1;CIPOS=0,1;HOMLEN=1;HOMSEQ=A;BND_DEPTH=50;MATE_BND_DEPTH=59	GT:FT:GQ:PL:PR:SR	0/1:PASS:45:95,0,999:22,3:76,6	Translocation	Heterozygous	P0_N2_treated_hermaphrodite	4945363	III	1	0	1	0	0	rep.4	58111353	1		1		PALTA3_CE
144219	IV	16571333	MantaBND:655:1:3:0:0:0:1	C	]III:4670559]C	441	PASS	SVTYPE=BND;MATEID=MantaBND:655:1:3:0:0:0:0;CIPOS=0,61;HOMLEN=61;HOMSEQ=TAGGGCTGTGCAACCGGACGTCCGGTTTTTTCGGACGTCCGAAAAACCGGACGCCGGACGC;BND_DEPTH=85;MATE_BND_DEPTH=43	GT:FT:GQ:PL:PR:SR	0/1:PASS:83:491,0,80:6,5:10,12	Translocation	Heterozygous	P0_N2_treated_hermaphrodite	4670559	III	61	0	61	0	0	rep.4	58111353	3		61			CELE4
144219	IV	16571333	MantaBND:655:3:4:0:0:0:0	C	]V:17490437]C	639	PASS	SVTYPE=BND;MATEID=MantaBND:655:3:4:0:0:0:1;CIPOS=0,38;HOMLEN=38;HOMSEQ=TAGGGCTGTGCAACCGGACGTCCGGTTTTTTCGGACGT;EVENT=MantaBND:655:3:4:0:0:0:0;JUNCTION_QUAL=446;BND_DEPTH=85;MATE_BND_DEPTH=43	GT:FT:GQ:PL:PR:SR	0/1:PASS:639:689,0,721:18,4:20,15	Translocation	Heterozygous	P0_N2_treated_hermaphrodite	17490437	V	38	0	38	0	0	rep.4	58111353	3		38	x
144219	IV	16571380	MantaBND:655:3:4:1:2:0:1	C	C[V:17490470[	639	PASS	SVTYPE=BND;MATEID=MantaBND:655:3:4:1:2:0:0;CIPOS=0,7;HOMLEN=7;HOMSEQ=CGGACGC;EVENT=MantaBND:655:3:4:0:0:0:0;JUNCTION_QUAL=143;BND_DEPTH=85;MATE_BND_DEPTH=42	GT:FT:GQ:PL:PR:SR	0/1:PASS:639:689,0,721:16,6:17,3	Translocation	Heterozygous	P0_N2_treated_hermaphrodite	17490470	V	7	0	7	0	0	rep.4	58111353	1		7
144219	IV	16571413	MantaBND:655:3:5:2:2:0:0	T	T[V:20705302[	193	PASS	SVTYPE=BND;MATEID=MantaBND:655:3:5:2:2:0:1;CIPOS=0,19;HOMLEN=19;HOMSEQ=CGGACGCGTGTGCGTCCGG;BND_DEPTH=85;MATE_BND_DEPTH=137	GT:FT:GQ:PL:PR:SR	0/1:PASS:193:243,0,466:5,2:35,18	Translocation	Heterozygous	P0_N2_treated_hermaphrodite	20705302	V	19	0	19	0	0	rep.4	58111353	1		19	x
144219	IV	16780713	MantaDEL:11:3:4:0:0:0	T	<DEL>	102	PASS	END=16784586;SVTYPE=DEL;SVLEN=-3873;IMPRECISE;CIPOS=-109,109;CIEND=-133,133	GT:FT:GQ:PL:PR	0/1:PASS:102:152,0,456:31,11	Deletion	Heterozygous	P0_N2_treated_hermaphrodite	16784586	IV	0	-109	109	-133	133	rep.4	58111353			133
144219	IV	16938400	MantaINS:1144:0:0:0:4:0	A	<INS>	999	PASS	END=16938400;SVTYPE=INS;CIPOS=0,11;CIEND=0,11;HOMLEN=11;HOMSEQ=AAAATATAAAA;LEFT_SVINSSEQ=AAAATATAAAAAAAATTTTATATTTTAAAAAGGTTAAAAATTCCCATAGATTCGCTTATCAATTCAAAAAAAATTCCAAAAAGAATAGGAAAAAATAATTTTTCAATAAAAAAAAAAAATTCCCAAATTATTTTCAGAAAACTGTTGAAAAAAATGGACAAATTCAGAAAAAATAATTGTTTTTCTTCAAAAATTAAGAATTTTTGAAAT;RIGHT_SVINSSEQ=TTTTTAAACAGTTTTCTGAAAATAATTTGGGAATTTTTTTTTTTAATTGAAAAATTATTTTTTCCTATTCTTTTTGGAATTTTT…	GT:FT:GQ:PL:PR:SR	1/1:PASS:122:999,125,0:1,2:0,50	Insertion	Homozygous	P0_N2_treated_hermaphrodite	16938400	IV	11	0	11	0	11	rep.4	58111353			11
144219	IV	17326147	MantaBND:81:1:6:0:0:0:0	G	G]I:11511624]	44	PASS	SVTYPE=BND;MATEID=MantaBND:81:1:6:0:0:0:1;IMPRECISE;CIPOS=-147,148;BND_DEPTH=70;MATE_BND_DEPTH=73	GT:FT:GQ:PL:PR	0/1:PASS:44:94,0,518:35,10	Translocation	Heterozygous	P0_N2_treated_hermaphrodite	11511624	I	0	-147	148	0	0	rep.4	58111353	2		148	x	PALTTAA3_CE	HAT3_CE
144219	IV	17492374	MantaINS:1148:0:0:0:0:0	T	TGAGTAAAATAAACTGTAAAGCCAGAGAGTAAAAAATACGGTGAAGCCAGAGAGTAAAATAAACTGTGAAGCCAGAGAGTAAAATATACGGTGAAGCCAGA	999	PASS	END=17492374;SVTYPE=INS;SVLEN=100;CIGAR=1M100I;CIPOS=0,16;HOMLEN=16;HOMSEQ=GAGTAAAATAAACTGT	GT:FT:GQ:PL:PR:SR	1/1:PASS:82:999,85,0:0,0:0,36	Insertion	Homozygous	P0_N2_treated_hermaphrodite	17492374	IV	16	0	16	0	0	rep.4	58111353			16
144219	IV	17492390	MantaBND:1148:0:1:1:0:0:1	T	TA]IV:17493072]	999	PASS	SVTYPE=BND;MATEID=MantaBND:1148:0:1:1:0:0:0;SVINSLEN=1;SVINSSEQ=A;BND_DEPTH=62;MATE_BND_DEPTH=109	GT:FT:GQ:PL:PR:SR	0/1:PASS:694:999,0,691:26,18:56,36	Translocation	Heterozygous	P0_N2_treated_hermaphrodite	17493072	IV	0	0	0	0	0	rep.4	58111353	2	A	0	x		CeRep55
144219	IV	17493072	MantaBND:1148:0:1:1:0:0:0	T	TT]IV:17492390]	999	PASS	SVTYPE=BND;MATEID=MantaBND:1148:0:1:1:0:0:1;SVINSLEN=1;SVINSSEQ=T;BND_DEPTH=109;MATE_BND_DEPTH=62	GT:FT:GQ:PL:PR:SR	0/1:PASS:694:999,0,691:26,18:56,36	Translocation	Heterozygous	P0_N2_treated_hermaphrodite	17492390	IV	0	0	0	0	0	rep.4	58111353	2	T	0	x	CeRep55
144219	V	61859	MantaBND:1025:2:3:0:0:0:0	T	[V:7073919[CT	351	PASS	SVTYPE=BND;MATEID=MantaBND:1025:2:3:0:0:0:1;SVINSLEN=1;SVINSSEQ=C;BND_DEPTH=41;MATE_BND_DEPTH=69	GT:FT:GQ:PL:PR:SR	0/1:PASS:351:401,0,898:27,3:49,12	Translocation	Heterozygous	P0_N2_treated_hermaphrodite	7073919	V	0	0	0	0	0	rep.4	58111353	4	C	0
144219	V	226037	MantaBND:546:3:4:0:0:0:0	G	[V:845512[G	655	PASS	SVTYPE=BND;MATEID=MantaBND:546:3:4:0:0:0:1;CIPOS=0,16;HOMLEN=16;HOMSEQ=GAGCGATTTGCGGAGC;BND_DEPTH=68;MATE_BND_DEPTH=66	GT:FT:GQ:PL:PR:SR	0/1:PASS:436:705,0,433:15,2:29,20	Translocation	Heterozygous	P0_N2_treated_hermaphrodite	845512	V	16	0	16	0	0	rep.4	58111353	4		16	x		NPAL0A_CE
144219	V	306874	MantaBND:812:2:3:0:0:0:0	T	]III:11114378]T	514	PASS	SVTYPE=BND;MATEID=MantaBND:812:2:3:0:0:0:1;CIPOS=0,29;HOMLEN=29;HOMSEQ=CGCTTTTTTCACGGCCACCTCTTCCATTC;BND_DEPTH=26;MATE_BND_DEPTH=54	GT:FT:GQ:PL:PR:SR	0/1:PASS:153:564,0,150:0,5:21,13	Translocation	Heterozygous	P0_N2_treated_hermaphrodite	11114378	III	29	0	29	0	0	rep.4	58111353	3		29
144219	V	686153	MantaBND:363:0:1:0:0:0:1	T	]II:2141116]T	999	PASS	SVTYPE=BND;MATEID=MantaBND:363:0:1:0:0:0:0;CIPOS=0,12;HOMLEN=12;HOMSEQ=TAACAAGGAAAG;BND_DEPTH=133;MATE_BND_DEPTH=100	GT:FT:GQ:PL:PR:SR	0/1:PASS:421:999,0,418:17,14:26,38	Translocation	Heterozygous	P0_N2_treated_hermaphrodite	2141116	II	12	0	12	0	0	rep.4	58111353	3		12	x
144219	V	845496	MantaBND:546:3:4:0:0:0:1	C	[V:226053[C	655	PASS	SVTYPE=BND;MATEID=MantaBND:546:3:4:0:0:0:0;CIPOS=0,16;HOMLEN=16;HOMSEQ=TCCGCAAATCGCTCCT;BND_DEPTH=66;MATE_BND_DEPTH=68	GT:FT:GQ:PL:PR:SR	0/1:PASS:436:705,0,433:15,2:29,20	Translocation	Heterozygous	P0_N2_treated_hermaphrodite	226053	V	16	0	16	0	0	rep.4	58111353	4		16	x	NPAL0A_CE
144219	V	900506	MantaBND:754:4:5:0:0:0:1	T	TAGGCTTGATTCCCCCCGTAGTG]IV:5690576]	505	PASS	SVTYPE=BND;MATEID=MantaBND:754:4:5:0:0:0:0;SVINSLEN=22;SVINSSEQ=AGGCTTGATTCCCCCCGTAGTG;BND_DEPTH=54;MATE_BND_DEPTH=69	GT:FT:GQ:PL:PR:SR	0/1:PASS:505:555,0,643:22,4:39,13	Translocation	Heterozygous	P0_N2_treated_hermaphrodite	5690576	IV	0	0	0	0	0	rep.4	58111353	2	AGGCTTGATTCCCCCCGTAGTG	0
144219	V	1772177	MantaBND:71:0:1:0:0:0:0	A	[I:2295529[A	545	PASS	SVTYPE=BND;MATEID=MantaBND:71:0:1:0:0:0:1;CIPOS=0,27;HOMLEN=27;HOMSEQ=GCGCGCTCTAATAATTATTCGGCTTTG;BND_DEPTH=38;MATE_BND_DEPTH=93	GT:FT:GQ:PL:PR:SR	0/1:PASS:421:595,0,418:16,2:24,15	Translocation	Heterozygous	P0_N2_treated_hermaphrodite	2295529	I	27	0	27	0	0	rep.4	58111353	4		27
144219	V	2600122	MantaINS:1194:0:0:0:0:0	G	GAAAAATTCGATGAATTTTTGAGAAAGTATCTGAACCAAAACAAAAAGTTATAAGCAGAATTTGCATAAAATAGTAAAACACATTATTGTGTATCATTTTACAATAAAATTAGATGTGTTTTACTATTTTATGCAACTTCTGCTTATAACTTTTTGTTTTGGTTCAGATACTTTCTC	999	PASS	END=2600122;SVTYPE=INS;SVLEN=176;CIGAR=1M176I;CIPOS=0,8;HOMLEN=8;HOMSEQ=AAAAATTC	GT:FT:GQ:PL:PR:SR	1/1:PASS:220:999,223,0:0,3:0,99	Insertion	Homozygous	P0_N2_treated_hermaphrodite	2600122	V	8	0	8	0	0	rep.4	58111353			8
144219	V	2646698	MantaBND:843:1:4:0:0:0:0	A	A[X:13479515[	31	PASS	SVTYPE=BND;MATEID=MantaBND:843:1:4:0:0:0:1;IMPRECISE;CIPOS=-284,284;BND_DEPTH=52;MATE_BND_DEPTH=66	GT:FT:GQ:PL:PR	0/1:PASS:31:81,0,274:19,8	Translocation	Heterozygous	P0_N2_treated_hermaphrodite	13479515	X	0	-284	284	0	0	rep.4	58111353	1		284		PALTTAA1_CE	HAT1_CE
144219	V	2701115	MantaBND:247:0:1:0:0:0:0	A	A]I:11630178]	77	PASS	SVTYPE=BND;MATEID=MantaBND:247:0:1:0:0:0:1;IMPRECISE;CIPOS=-151,152;BND_DEPTH=49;MATE_BND_DEPTH=54	GT:FT:GQ:PL:PR	0/1:PASS:77:127,0,663:45,16	Translocation	Heterozygous	P0_N2_treated_hermaphrodite	11630178	I	0	-151	152	0	0	rep.4	58111353	2		152	x	HAT1_CE
144219	V	3484539	MantaDEL:1207:0:1:0:0:0	TGTGTCCGTTAAAAATCGATAATAGAACAACTGCATGTCGTCATTTCGATTCGCTTTCTTCCTTAAAAAGTTAACATTTTTC	TCTAGTCATTACATCTAGAAAATCAAACATCTA	96	PASS	END=3484620;SVTYPE=DEL;SVLEN=-81;CIGAR=1M32I81D	GT:FT:GQ:PL:PR:SR	0/1:PASS:96:146,0,747:16,0:56,9	Deletion	Heterozygous	P0_N2_treated_hermaphrodite	3484620	V	0	0	0	0	0	rep.4	58111353			0
144219	V	4248545	MantaBND:301:1:2:0:0:0:0	T	T]I:14340296]	554	PASS	SVTYPE=BND;MATEID=MantaBND:301:1:2:0:0:0:1;CIPOS=0,7;HOMLEN=7;HOMSEQ=GCACTGC;BND_DEPTH=58;MATE_BND_DEPTH=34	GT:FT:GQ:PL:PR:SR	0/1:PASS:203:604,0,200:9,5:17,14	Translocation	Heterozygous	P0_N2_treated_hermaphrodite	14340296	I	7	0	7	0	0	rep.4	58111353	2		7
144219	V	4248554	MantaBND:301:0:1:0:0:0:1	G	[I:14340152[G	999	PASS	SVTYPE=BND;MATEID=MantaBND:301:0:1:0:0:0:0;CIPOS=0,1;HOMLEN=1;HOMSEQ=T;BND_DEPTH=58;MATE_BND_DEPTH=40	GT:FT:GQ:PL:PR:SR	1/1:PASS:71:999,74,0:1,6:0,31	Translocation	Homozygous	P0_N2_treated_hermaphrodite	14340152	I	1	0	1	0	0	rep.4	58111353	4		1	x
144219	V	4914049	MantaBND:968:0:1:0:0:0:0	A	ATG[IV:6320432[	999	PASS	SVTYPE=BND;MATEID=MantaBND:968:0:1:0:0:0:1;SVINSLEN=2;SVINSSEQ=TG;BND_DEPTH=85;MATE_BND_DEPTH=78	GT:FT:GQ:PL:PR:SR	0/1:PASS:124:999,0,121:9,21:17,41	Translocation	Heterozygous	P0_N2_treated_hermaphrodite	6320432	IV	0	0	0	0	0	rep.4	58111353	1	TG	0	x		PALTA3_CE
144219	V	7073919	MantaBND:1025:2:3:0:0:0:1	T	[V:61859[GT	351	PASS	SVTYPE=BND;MATEID=MantaBND:1025:2:3:0:0:0:0;SVINSLEN=1;SVINSSEQ=G;BND_DEPTH=69;MATE_BND_DEPTH=41	GT:FT:GQ:PL:PR:SR	0/1:PASS:351:401,0,898:27,3:49,12	Translocation	Heterozygous	P0_N2_treated_hermaphrodite	61859	V	0	0	0	0	0	rep.4	58111353	4	G	0
144219	V	7491646	MantaBND:754:6:7:0:0:0:1	T	]IV:9022751]T	567	PASS	SVTYPE=BND;MATEID=MantaBND:754:6:7:0:0:0:0;CIPOS=0,4;HOMLEN=4;HOMSEQ=TTGA;BND_DEPTH=73;MATE_BND_DEPTH=50	GT:FT:GQ:PL:PR:SR	0/1:PASS:567:617,0,777:18,8:46,17	Translocation	Heterozygous	P0_N2_treated_hermaphrodite	9022751	IV	4	0	4	0	0	rep.4	58111353	3		4
144219	V	8158794	MantaINS:1273:0:0:0:3:0	A	<INS>	999	PASS	END=8158794;SVTYPE=INS;CIPOS=0,6;CIEND=0,6;HOMLEN=6;HOMSEQ=ATGATC;LEFT_SVINSSEQ=ATGATCGCTGATGACTGAAAAAAAGAAAAAAAAAGAAAAACTGAAGCCTCGATCAAACTGACCTAAATATTTGTAGGACTTTGATATTTGCTAGCATCATTTATTATTTTCATTCAAATTTATTTAAAACGTTTCAGGAATCTATGGAGACTCTATCAATGAGATGTCATGGGCAGTTGGAGAGGTTTTAGACAGTCTTGTAAATGCTGGAATTGCTGAAAATACATTGGTTATTTTAATGTCTGATCATGGACCACATGTTGAACTATGTCTAAATGGTGGATCAACAGCTGGATTGAAAGGAGGAAAGTCGAATAGT…	GT:FT:GQ:PL:PR:SR	1/1:PASS:122:999,125,0:0,0:0,50	Insertion	Homozygous	P0_N2_treated_hermaphrodite	8158794	V	6	0	6	0	6	rep.4	58111353			6
144219	V	9554051	MantaBND:75:1:2:0:0:0:1	T	[X:466019[T	999	PASS	SVTYPE=BND;MATEID=MantaBND:75:1:2:0:0:0:0;CIPOS=0,37;HOMLEN=37;HOMSEQ=TTTCGCCTTCCGGCAAAAAGGTGGGAGAAAGAAGACG;BND_DEPTH=41;MATE_BND_DEPTH=107	GT:FT:GQ:PL:PR:SR	0/1:PASS:365:999,0,362:18,8:29,26	Translocation	Heterozygous	P0_N2_treated_hermaphrodite	466019	X	37	0	37	0	0	rep.4	58111353	4		37	x
144219	V	9724732	MantaBND:959:0:1:0:0:0:0	A	]IV:4816396]TCGACTA	872	PASS	SVTYPE=BND;MATEID=MantaBND:959:0:1:0:0:0:1;SVINSLEN=6;SVINSSEQ=TCGACT;BND_DEPTH=78;MATE_BND_DEPTH=99	GT:FT:GQ:PL:PR:SR	0/1:PASS:618:922,0,615:25,15:36,27	Translocation	Heterozygous	P0_N2_treated_hermaphrodite	4816396	IV	0	0	0	0	0	rep.4	58111353	3	TCGACT	0	x	CELE14B	IR3_CE
144219	V	10866443	MantaBND:8:1:2:0:0:0:1	G	[IV:6005775[G	163	PASS	SVTYPE=BND;MATEID=MantaBND:8:1:2:0:0:0:0;IMPRECISE;CIPOS=-296,296;BND_DEPTH=118;MATE_BND_DEPTH=108	GT:FT:GQ:PL:PR	0/1:PASS:163:213,0,999:74,22	Translocation	Heterozygous	P0_N2_treated_hermaphrodite	6005775	IV	0	-296	296	0	0	rep.4	58111353	4		296
144219	V	11690781	MantaINS:1316:0:0:0:0:0	A	AAAAATTTTCAATAAAAAATCAAATAAATAAATAAATAAATATGCTGATAAAAACACACAAACTATTGAATTGATATCACTGATAAAATAATAAAGAATAATCAGTCTTGATTTTTGAATAAAAATTCCAAAGCAAGACTGATTATTCTTTATTATTTTATCAGTGATATCAATTCAATAGTTTGTGTGTTTTTATCAGCATATTTATTTATTTATTTATTTGATTTTTTATTGAAAATTTTTTATTG	999	PASS	END=11690781;SVTYPE=INS;SVLEN=247;CIGAR=1M247I;CIPOS=0,8;HOMLEN=8;HOMSEQ=AAAATTTT	GT:FT:GQ:PL:PR:SR	1/1:PASS:150:999,153,0:0,4:0,58	Insertion	Homozygous	P0_N2_treated_hermaphrodite	11690781	V	8	0	8	0	0	rep.4	58111353			8
144219	V	12167424	MantaINS:1330:0:0:0:0:0	C	CCCTGGTGGTCCTGGTGGTCCGGCTGGGCATGTGATGCAAGCAGAAGCAGATGAGTGTTGTTCAGCAACTCCAGCTCCTCCAGCTTGTCCATCACCTCCTGGTTCTCCTGCCTCTCCTGGAGCACCATCCTCT	999	PASS	END=12167424;SVTYPE=INS;SVLEN=132;CIGAR=1M132I;CIPOS=0,20;HOMLEN=20;HOMSEQ=CCTGGTGGTCCTGGTGGTCC	GT:FT:GQ:PL:PR:SR	1/1:PASS:145:999,148,0:0,0:0,63	Insertion	Homozygous	P0_N2_treated_hermaphrodite	12167424	V	20	0	20	0	0	rep.4	58111353			20
144219	V	12864683	MantaBND:277:3:4:0:0:0:0	A	A[III:55714[	999	PASS	SVTYPE=BND;MATEID=MantaBND:277:3:4:0:0:0:1;BND_DEPTH=42;MATE_BND_DEPTH=92	GT:FT:GQ:PL:PR:SR	0/1:PASS:470:999,0,467:9,9:37,29	Translocation	Heterozygous	P0_N2_treated_hermaphrodite	55714	III	0	0	0	0	0	rep.4	58111353	1		0
144219	V	13362655	MantaDUP:TANDEM:1345:0:1:0:0:0	T	<DUP:TANDEM>	999	PASS	END=13367099;SVTYPE=DUP;SVLEN=4444;CIPOS=0,2;CIEND=0,2;HOMLEN=2;HOMSEQ=AT	GT:FT:GQ:PL:PR:SR	0/1:PASS:999:999,0,999:39,21:68,45	Tandem Duplication	Heterozygous	P0_N2_treated_hermaphrodite	13367099	V	2	0	2	0	2	rep.4	58111353			2
144219	V	14744889	MantaINS:338:1:1:0:0:0	T	TCCACCTCCTCCTGCTGCGTAGCCTCCTCCTGACGATCCTCCTCCACCTCCACCTGACGAGTATCCTCCAGATGATGCCTGTGGACCAGCAGATTCAGGCGCCGGTGGTGGTGGGGGAGCCGATGCAGCTGCATATCCTCCTCCACCTCCTCCTGAGGGCTTAGCGTACCCTCCTCCTGACGGTCCTCCACCTCGTCCCGAAGCATATCCTCCACCTCCACCTGATGGCTTTGCGTATCCTCCACCACCTCCGCCTCCTCCTGATGCGTATCCACCACCACCTCCTCCTGATGGCTTAGGATATCCTCCGCCTGCTCCA	999	PASS	END=14744889;SVTYPE=INS;SVLEN=318;CIGAR=1M318I;CIPOS=0,13;HOMLEN=13;HOMSEQ=CCACCTCCTCCTG	GT:FT:GQ:PL:PR:SR	1/1:PASS:117:999,120,0:6,0:0,71	Insertion	Homozygous	P0_N2_treated_hermaphrodite	14744889	V	13	0	13	0	0	rep.4	58111353			13
144219	V	16920803	MantaDEL:1398:0:1:0:0:0	CCGTGTCGCGGGTCGACACGCGACACGCTCTGAGCGTGTCGGCGTGTCGCGTGTCGACCCGCGACTCATTT	C	52	PASS	END=16920873;SVTYPE=DEL;SVLEN=-70;CIGAR=1M70D;CIPOS=0,7;HOMLEN=7;HOMSEQ=CGTGTCG	GT:FT:GQ:PL:PR:SR	0/1:PASS:52:102,0,193:1,0:14,4	Deletion	Heterozygous	P0_N2_treated_hermaphrodite	16920873	V	7	0	7	0	0	rep.4	58111353			7
144219	V	17040145	MantaBND:812:1:2:0:0:0:1	A	A]III:11114437]	319	PASS	SVTYPE=BND;MATEID=MantaBND:812:1:2:0:0:0:0;CIPOS=0,59;HOMLEN=59;HOMSEQ=CACGGGTTTCTAATTTCCCCCCTGTTTTCAAATGGAAGAGGTGGCCGTGAAAAAAGCGA;BND_DEPTH=32;MATE_BND_DEPTH=54	GT:FT:GQ:PL:PR:SR	0/1:PASS:155:369,0,152:10,7:5,6	Translocation	Heterozygous	P0_N2_treated_hermaphrodite	11114437	III	59	0	59	0	0	rep.4	58111353	2		59	x	LINE2F_CE
144219	V	17040241	MantaBND:812:0:1:0:0:0:0	T	[III:11114157[T	329	PASS	SVTYPE=BND;MATEID=MantaBND:812:0:1:0:0:0:1;CIPOS=0,20;HOMLEN=20;HOMSEQ=TCCATTTGAAAACAGGGGGG;BND_DEPTH=40;MATE_BND_DEPTH=45	GT:FT:GQ:PL:PR:SR	0/1:PASS:328:379,0,335:16,9:20,8	Translocation	Heterozygous	P0_N2_treated_hermaphrodite	11114157	III	20	0	20	0	0	rep.4	58111353	4		20	x
144219	V	17490437	MantaBND:655:3:4:0:0:0:1	G	G[IV:16571333[	639	PASS	SVTYPE=BND;MATEID=MantaBND:655:3:4:0:0:0:0;CIPOS=0,38;HOMLEN=38;HOMSEQ=CTAGGGCTGTGCAACCGGACGTCCGGTTTTTTCGGACG;EVENT=MantaBND:655:3:4:0:0:0:0;JUNCTION_QUAL=446;BND_DEPTH=43;MATE_BND_DEPTH=85	GT:FT:GQ:PL:PR:SR	0/1:PASS:639:689,0,721:18,4:20,15	Translocation	Heterozygous	P0_N2_treated_hermaphrodite	16571333	IV	38	0	38	0	0	rep.4	58111353	1		38	x
144219	V	17490470	MantaBND:655:3:4:1:2:0:0	C	]IV:16571380]C	639	PASS	SVTYPE=BND;MATEID=MantaBND:655:3:4:1:2:0:1;CIPOS=0,7;HOMLEN=7;HOMSEQ=GGACGCG;EVENT=MantaBND:655:3:4:0:0:0:0;JUNCTION_QUAL=143;BND_DEPTH=42;MATE_BND_DEPTH=85	GT:FT:GQ:PL:PR:SR	0/1:PASS:639:689,0,721:16,6:17,3	Translocation	Heterozygous	P0_N2_treated_hermaphrodite	16571380	IV	7	0	7	0	0	rep.4	58111353	3		7
144219	V	18175236	MantaDEL:1434:0:0:1:0:0	GCGCAATTCTAGTGACTTGACGCAATTCTAGTTCCTTGACGCAATTCTAGTGTATTGACGCAATTCTAGTACTTTGGCGCTATTCCAGTACTTTGGCGCAATTCTAGTTCCTTGACGCAATTCTAGTGTATTGACGCATATCTAGTACTTTGGCGCTATTCCAGTACATTGGCGCAATTCTAGTGGCTTGACGCAATTATCGTGCCTTGGTGCAATTCTAGTTCCTTGACGCAATTCTAGTGGCTTGACGCAATTCTAGTGTATTGA	G	222	PASS	END=18175502;SVTYPE=DEL;SVLEN=-266;CIGAR=1M266D;CIPOS=0,26;HOMLEN=26;HOMSEQ=CGCAATTCTAGTGACTTGACGCAATT	GT:FT:GQ:PL:PR:SR	0/1:PASS:222:272,0,788:21,4:70,16	Deletion	Heterozygous	P0_N2_treated_hermaphrodite	18175502	V	26	0	26	0	0	rep.4	58111353			26
144219	V	18175497	MantaDUP:TANDEM:1434:0:1:0:0:0	T	<DUP:TANDEM>	201	PASS	END=18176408;SVTYPE=DUP;SVLEN=911;SVINSLEN=1;SVINSSEQ=C	GT:FT:GQ:PL:PR:SR	0/1:PASS:201:251,0,999:32,5:67,8	Tandem Duplication	Heterozygous	P0_N2_treated_hermaphrodite	18176408	V	0	0	0	0	0	rep.4	58111353			0
144219	V	18679779	MantaDUP:TANDEM:1423:0:5:0:0:0	T	<DUP:TANDEM>	753	PASS	END=18683415;SVTYPE=DUP;SVLEN=3636;CIPOS=0,13;CIEND=0,13;HOMLEN=13;HOMSEQ=ATTCCAAAAAATT	GT:FT:GQ:PL:PR:SR	0/1:PASS:519:803,0,516:24,4:36,26	Tandem Duplication	Heterozygous	P0_N2_treated_hermaphrodite	18683415	V	13	0	13	0	13	rep.4	58111353			13
144219	V	18680132	MantaDUP:TANDEM:1423:2:4:0:1:0	C	<DUP:TANDEM>	174	PASS	END=18682059;SVTYPE=DUP;SVLEN=1927;CIPOS=0,24;CIEND=0,24;HOMLEN=24;HOMSEQ=AAAATTTCAAAATTCCAAAAAATT	GT:FT:GQ:PL:PR:SR	0/1:PASS:174:224,0,807:22,4:52,9	Tandem Duplication	Heterozygous	P0_N2_treated_hermaphrodite	18682059	V	24	0	24	0	24	rep.4	58111353			24
144219	V	18681172	MantaDEL:1423:4:4:1:0:0	CCAAAAAATTTCAAAATTCCAAAAAAATTCAAAATTTCAAAAAATTTCAAAATTCCAAAAAGTTTAAAAATTTAAAAATTCCCCAAAATTTCAAAATTTCAAAATTTTCAAACTTTCAAAAATTTCAAAATTCCAAAAAATTCAAAATTCCAAAAAATTCAAAATTCCAAAAAATTTCAGAATTCCAAAAAATTTCAAAATTCCAAAAAATTTCTAAATTTCTAAAATTTCTAAATTTCTAAAATTTCAAAATTCCAAAAAATTTAAAAAATTAAAAATTCCACAAAATTTCAAAATTCCAAGAAATTTCAAAATTCCAAGAAATTTCAAAATTCCAAAAAATTTCAAAATTCCAAAAAATTTCAAAATGTCAAAAATTTCAAAATTTAAAAAATTTCA…	C	399	PASS	END=18681741;SVTYPE=DEL;SVLEN=-569;CIGAR=1M569D;CIPOS=0,53;HOMLEN=53;HOMSEQ=CAAAAAATTTCAAAATTCCAAAAAAATTCAAAATTTCAAAAAATTTCAAAATT	GT:FT:GQ:PL:PR:SR	0/1:PASS:399:449,0,544:25,6:25,10	Deletion	Heterozygous	P0_N2_treated_hermaphrodite	18681741	V	53	0	53	0	0	rep.4	58111353			53
144219	V	18681828	MantaDUP:TANDEM:1423:4:6:0:1:0	A	<DUP:TANDEM>	390	PASS	END=18682532;SVTYPE=DUP;SVLEN=704;CIPOS=0,62;CIEND=0,62;HOMLEN=62;HOMSEQ=TTCAAAATTCCAAAAAATTCAAAATTCCAAAAAATTTCAGAATTCCAAAAAATTTCAAAATT	GT:FT:GQ:PL:PR:SR	0/1:PASS:390:440,0,650:28,2:32,17	Tandem Duplication	Heterozygous	P0_N2_treated_hermaphrodite	18682532	V	62	0	62	0	62	rep.4	58111353			62
144219	V	18683253	MantaDEL:1423:0:0:0:0:0	CAAAAAATTTCAAAATTCCAAAAAATTTCAAAATTCCAAAAAAATTCAAAATTTCA	C	466	PASS	END=18683308;SVTYPE=DEL;SVLEN=-55;CIGAR=1M55D;CIPOS=0,5;HOMLEN=5;HOMSEQ=AAAAA	GT:FT:GQ:PL:PR:SR	0/1:PASS:466:516,0,636:14,0:45,17	Deletion	Heterozygous	P0_N2_treated_hermaphrodite	18683308	V	5	0	5	0	0	rep.4	58111353			5
144219	V	18995435	MantaBND:62:1:4:0:0:0:1	C	[III:467778[C	723	PASS	SVTYPE=BND;MATEID=MantaBND:62:1:4:0:0:0:0;CIPOS=0,2;HOMLEN=2;HOMSEQ=AC;BND_DEPTH=44;MATE_BND_DEPTH=105	GT:FT:GQ:PL:PR:SR	0/1:PASS:723:773,0,909:37,4:58,20	Translocation	Heterozygous	P0_N2_treated_hermaphrodite	467778	III	2	0	2	0	0	rep.4	58111353	4		2		PAL5A_CE	PAL8D_CE
144219	V	19877606	MantaDEL:283:1:1:2:0:0	TTTTTTTTCATCACACTTAATTAAAAAATTCATATTCTTCATGAAATTCTACACATTTCCCAATTTGGAA	TGAAT	702	PASS	END=19877675;SVTYPE=DEL;SVLEN=-69;CIGAR=1M4I69D	GT:FT:GQ:PL:PR:SR	0/1:PASS:558:752,0,555:7,0:41,21	Deletion	Heterozygous	P0_N2_treated_hermaphrodite	19877675	V	0	0	0	0	0	rep.4	58111353			0
144219	V	20705302	MantaBND:655:1:5:0:1:0:0	C	]III:4670620]CACCCAACGTCCGGTTTTTTC	255	PASS	SVTYPE=BND;MATEID=MantaBND:655:1:5:0:1:0:1;SVINSLEN=20;SVINSSEQ=CACCCAACGTCCGGTTTTTT;BND_DEPTH=137;MATE_BND_DEPTH=33	GT:FT:GQ:PL:PR:SR	0/1:PASS:255:305,0,459:9,1:42,14	Translocation	Heterozygous	P0_N2_treated_hermaphrodite	4670620	III	0	0	0	0	0	rep.4	58111353	3	CACCCAACGTCCGGTTTTTT	0
144219	V	20705302	MantaBND:655:3:5:2:2:0:1	C	]IV:16571413]C	193	PASS	SVTYPE=BND;MATEID=MantaBND:655:3:5:2:2:0:0;CIPOS=0,19;HOMLEN=19;HOMSEQ=GGACGCGTGTGCGTCCGGC;BND_DEPTH=137;MATE_BND_DEPTH=85	GT:FT:GQ:PL:PR:SR	0/1:PASS:193:243,0,466:5,2:35,18	Translocation	Heterozygous	P0_N2_treated_hermaphrodite	16571413	IV	19	0	19	0	0	rep.4	58111353	3		19	x
144219	V	20705450	MantaBND:655:1:6:0:2:0:1	A	A[III:4670588[	368	PASS	SVTYPE=BND;MATEID=MantaBND:655:1:6:0:2:0:0;BND_DEPTH=130;MATE_BND_DEPTH=43	GT:FT:GQ:PL:PR:SR	0/1:PASS:319:418,0,316:0,5:28,12	Translocation	Heterozygous	P0_N2_treated_hermaphrodite	4670588	III	0	0	0	0	0	rep.4	58111353	1		0	x
144219	X	216888	MantaBND:131:1:2:0:0:0:0	T	T]IV:1312653]	999	PASS	SVTYPE=BND;MATEID=MantaBND:131:1:2:0:0:0:1;CIPOS=0,8;HOMLEN=8;HOMSEQ=GTTGATCT;BND_DEPTH=49;MATE_BND_DEPTH=76	GT:FT:GQ:PL:PR:SR	0/1:PASS:455:999,0,452:20,6:27,29	Translocation	Heterozygous	P0_N2_treated_hermaphrodite	1312653	IV	8	0	8	0	0	rep.4	58111353	2		8	x
144219	X	216891	MantaBND:131:1:3:0:0:0:1	T	T]X:256071]	999	PASS	SVTYPE=BND;MATEID=MantaBND:131:1:3:0:0:0:0;CIPOS=0,5;HOMLEN=5;HOMSEQ=GATCT;BND_DEPTH=49;MATE_BND_DEPTH=46	GT:FT:GQ:PL:PR:SR	1/1:PASS:97:999,100,0:0,24:0,18	Translocation	Homozygous	P0_N2_treated_hermaphrodite	256071	X	5	0	5	0	0	rep.4	58111353	2		5	x
144219	X	256066	MantaBND:131:1:3:0:0:0:0	G	G]X:216896]	999	PASS	SVTYPE=BND;MATEID=MantaBND:131:1:3:0:0:0:1;CIPOS=0,5;HOMLEN=5;HOMSEQ=AGATC;BND_DEPTH=46;MATE_BND_DEPTH=49	GT:FT:GQ:PL:PR:SR	1/1:PASS:97:999,100,0:0,24:0,18	Translocation	Homozygous	P0_N2_treated_hermaphrodite	216896	X	5	0	5	0	0	rep.4	58111353	2		5	x
144219	X	465982	MantaBND:75:1:2:0:0:0:0	G	[V:9554088[G	999	PASS	SVTYPE=BND;MATEID=MantaBND:75:1:2:0:0:0:1;CIPOS=0,37;HOMLEN=37;HOMSEQ=TCTTCTTTCTCCCACCTTTTTGCCGGAAGGCGAAAAA;BND_DEPTH=107;MATE_BND_DEPTH=41	GT:FT:GQ:PL:PR:SR	0/1:PASS:365:999,0,362:18,8:29,26	Translocation	Heterozygous	P0_N2_treated_hermaphrodite	9554088	V	37	0	37	0	0	rep.4	58111353	4		37	x
144219	X	466044	MantaBND:75:0:1:0:0:0:1	G	]I:2652464]G	996	PASS	SVTYPE=BND;MATEID=MantaBND:75:0:1:0:0:0:0;CIPOS=0,4;HOMLEN=4;HOMSEQ=TGGT;BND_DEPTH=140;MATE_BND_DEPTH=52	GT:FT:GQ:PL:PR:SR	0/1:PASS:402:999,0,399:1,4:41,29	Translocation	Heterozygous	P0_N2_treated_hermaphrodite	2652464	I	4	0	4	0	0	rep.4	58111353	3		4	x
144219	X	1417312	MantaBND:1488:1:2:0:0:0:0	C	C]X:14966896]	448	PASS	SVTYPE=BND;MATEID=MantaBND:1488:1:2:0:0:0:1;CIPOS=0,31;HOMLEN=31;HOMSEQ=CTGTACAGAAAAGAGTTCCAAAACTCTTTTC;BND_DEPTH=75;MATE_BND_DEPTH=78	GT:FT:GQ:PL:PR:SR	0/1:PASS:448:498,0,540:26,2:30,21	Translocation	Heterozygous	P0_N2_treated_hermaphrodite	14966896	X	31	0	31	0	0	rep.4	58111353	2		31
144219	X	1417333	MantaINS:1488:1:1:0:0:0	A	AAACTCTTTTCCTTTCCTCAGTCACCGCGTTGGGGGGTTTTTCGAAGGTACCTCTAACTTGGTGACTGAGGAAAGGAAAAGAGTTTTTG	999	PASS	END=1417333;SVTYPE=INS;SVLEN=88;CIGAR=1M88I;CIPOS=0,10;HOMLEN=10;HOMSEQ=AACTCTTTTC	GT:FT:GQ:PL:PR:SR	0/1:PASS:29:999,0,26:0,0:10,35	Insertion	Heterozygous	P0_N2_treated_hermaphrodite	1417333	X	10	0	10	0	0	rep.4	58111353			10
144219	X	1884726	MantaDEL:245:12:12:0:0:0	ATTAAAAAAAATACTTCCGTACCAGCTATTATACTTTGATTGGCATATTCTGGTATATATGACTATGCTGACCAGTTTTATGAAATAAAAAAGAATGACTCCATATGATTTTCCCATACTTTTGAATTTCTGAAAAAATCAGCTTTTATATATTTTTATCAATTTAAAAAAAATACTTCCGTACAAGCTATTATACTTTGATTGGCTTATTCTGGTGTTTTTGACTATGCTGACAAGTTTTATGAAATAAAAAAGAATGACTCCATATGATTTTCCCATACTTCTGAATTTTTGAAAAAATCAGCTTTTATATATTTTTATCAAT	A	692	PASS	END=1885050;SVTYPE=DEL;SVLEN=-324;CIGAR=1M324D;CIPOS=0,2;HOMLEN=2;HOMSEQ=TT	GT:FT:GQ:PL:PR:SR	0/1:PASS:566:742,0,563:22,0:73,36	Deletion	Heterozygous	P0_N2_treated_hermaphrodite	1885050	X	2	0	2	0	0	rep.4	58111353			2
144219	X	1887948	MantaBND:245:0:1:0:0:0:0	T	T]I:11713576]	216	PASS	SVTYPE=BND;MATEID=MantaBND:245:0:1:0:0:0:1;BND_DEPTH=85;MATE_BND_DEPTH=88	GT:FT:GQ:PL:PR:SR	0/1:PASS:216:266,0,999:42,9:74,20	Translocation	Heterozygous	P0_N2_treated_hermaphrodite	11713576	I	0	0	0	0	0	rep.4	58111353	2		0	x
144219	X	2074842	MantaBND:135:6:7:0:0:0:1	A	]IV:15384992]A	267	PASS	SVTYPE=BND;MATEID=MantaBND:135:6:7:0:0:0:0;CIPOS=0,2;HOMLEN=2;HOMSEQ=TG;BND_DEPTH=65;MATE_BND_DEPTH=33	GT:FT:GQ:PL:PR:SR	0/1:PASS:267:317,0,669:15,5:40,8	Translocation	Heterozygous	P0_N2_treated_hermaphrodite	15384992	IV	2	0	2	0	0	rep.4	58111353	3		2
144219	X	5283390	MantaBND:69:22:27:0:0:0:0	A	A]III:1881146]	51	PASS	SVTYPE=BND;MATEID=MantaBND:69:22:27:0:0:0:1;CIPOS=0,1;HOMLEN=1;HOMSEQ=A;BND_DEPTH=112;MATE_BND_DEPTH=107	GT:FT:GQ:PL:PR:SR	0/1:PASS:51:101,0,713:10,3:54,10	Translocation	Heterozygous	P0_N2_treated_hermaphrodite	1881146	III	1	0	1	0	0	rep.4	58111353	2		1		(AG)n	(TC)n
144219	X	6833298	MantaINS:17:2:2:0:0:0	T	TCTAAACTTGGGCAAAAGTTAGGCAAAACTTTGGCAAGAGTTGGGTGAAACTTGGGTTAGACTTTGGTAAAGCTTGAATCCAAGTTTTGCCAAAGTCTTGCCTAACTTTTGCCCAAGTTTAGACAGCTTCTGATCCAAGTTAATATTTTTTGGG	966	PASS	END=6833298;SVTYPE=INS;SVLEN=153;CIGAR=1M153I;CIPOS=0,14;HOMLEN=14;HOMSEQ=CTAAACTTGGGCAA	GT:FT:GQ:PL:PR:SR	1/1:PASS:18:999,21,0:0,5:9,27	Insertion	Homozygous	P0_N2_treated_hermaphrodite	6833298	X	14	0	14	0	0	rep.4	58111353			14
144219	X	7832195	MantaBND:714:0:1:0:0:0:0	T	]III:5895749]TTCCAGT	103	PASS	SVTYPE=BND;MATEID=MantaBND:714:0:1:0:0:0:1;SVINSLEN=6;SVINSSEQ=TTCCAG;BND_DEPTH=65;MATE_BND_DEPTH=56	GT:FT:GQ:PL:PR:SR	0/1:PASS:103:153,0,999:41,6:72,6	Translocation	Heterozygous	P0_N2_treated_hermaphrodite	5895749	III	0	0	0	0	0	rep.4	58111353	3	TTCCAG	0
144219	X	8429683	MantaINS:1580:0:0:0:0:0	G	GCGTCCGGTCGTCCGAACCGGACGCACATGCGTCCGGTTGGGGGTAGGTTCCCACGGCGGCCGACAATTTCCGAGTTTCGCCACTCACTATACTTAATCAGTAATTTTATAGTGAGTGGCGAAACTCGGAAATTGTCGGCCGTCGTGGATAGCTACCCCCAACCGGACGCATGTGCGTCCGGTTCGGACGACCGGA	999	PASS	END=8429683;SVTYPE=INS;SVLEN=195;CIGAR=1M195I;CIPOS=0,8;HOMLEN=8;HOMSEQ=CGTCCGGT	GT:FT:GQ:PL:PR:SR	1/1:PASS:28:999,31,0:0,18:6,15	Insertion	Homozygous	P0_N2_treated_hermaphrodite	8429683	X	8	0	8	0	0	rep.4	58111353			8
144219	X	12190992	MantaBND:1636:0:1:0:0:0:1	C	C]X:12199124]	999	PASS	SVTYPE=BND;MATEID=MantaBND:1636:0:1:0:0:0:0;CIPOS=0,4;HOMLEN=4;HOMSEQ=GATC;BND_DEPTH=71;MATE_BND_DEPTH=67	GT:FT:GQ:PL:PR:SR	1/1:PASS:154:999,157,0:0,26:0,48	Translocation	Homozygous	P0_N2_treated_hermaphrodite	12199124	X	4	0	4	0	0	rep.4	58111353	2		4	x
144219	X	12199120	MantaBND:1636:0:1:0:0:0:0	T	T]X:12190996]	999	PASS	SVTYPE=BND;MATEID=MantaBND:1636:0:1:0:0:0:1;CIPOS=0,4;HOMLEN=4;HOMSEQ=GATC;BND_DEPTH=67;MATE_BND_DEPTH=71	GT:FT:GQ:PL:PR:SR	1/1:PASS:154:999,157,0:0,26:0,48	Translocation	Homozygous	P0_N2_treated_hermaphrodite	12190996	X	4	0	4	0	0	rep.4	58111353	2		4	x
144219	X	12276665	MantaINS:1639:0:0:5:5:0	TC	TTAATTAATGTTTATTTATTTAATTAATATTTATTTAATTAATTAATATTTATTTATTTAATTAGTATTTATTTTTTTAATTAATATTTTTTAATTTAATTAATATTTATTTTATTAATTAATATTTTTTTATTTAAATAATATTTATTTATTTAATTAGTATTTATTTATTT	646	PASS	END=12276666;SVTYPE=INS;SVLEN=172;CIGAR=1M172I1D	GT:FT:GQ:PL:PR:SR	0/1:PASS:70:696,0,67:0,0:8,24	Insertion	Heterozygous	P0_N2_treated_hermaphrodite	12276666	X	0	0	0	0	0	rep.4	58111353			0
144219	X	13479515	MantaBND:843:1:4:0:0:0:1	G	]V:2646698]G	31	PASS	SVTYPE=BND;MATEID=MantaBND:843:1:4:0:0:0:0;IMPRECISE;CIPOS=-157,158;BND_DEPTH=66;MATE_BND_DEPTH=52	GT:FT:GQ:PL:PR	0/1:PASS:31:81,0,274:19,8	Translocation	Heterozygous	P0_N2_treated_hermaphrodite	2646698	V	0	-157	158	0	0	rep.4	58111353	3		158	x	HAT1_CE	PALTTAA1_CE
144219	X	14788284	MantaDEL:1668:0:1:0:0:0	TGCGTCCGGTTTGGGGTAGCTTTCCATGGCGGCCGACAATTTCCGAGTTTCGCCACTGACTATAAAATTGCTGATTAAGTATAGTTAGTCGAGAAACTCGGAAATTGTCGGCCGCCGTGAAAAGCTACCCCAAACCGGACACATGG	T	174	PASS	END=14788429;SVTYPE=DEL;SVLEN=-145;CIGAR=1M145D;CIPOS=0,9;HOMLEN=9;HOMSEQ=GCGTCCGGT	GT:FT:GQ:PL:PR:SR	0/1:PASS:174:224,0,304:12,0:23,6	Deletion	Heterozygous	P0_N2_treated_hermaphrodite	14788429	X	9	0	9	0	0	rep.4	58111353			9
144219	X	14966865	MantaBND:1488:1:2:0:0:0:1	G	G]X:1417343]	448	PASS	SVTYPE=BND;MATEID=MantaBND:1488:1:2:0:0:0:0;CIPOS=0,31;HOMLEN=31;HOMSEQ=GAAAAGAGTTTTGGAACTCTTTTCTGTACAG;BND_DEPTH=78;MATE_BND_DEPTH=75	GT:FT:GQ:PL:PR:SR	0/1:PASS:448:498,0,540:26,2:30,21	Translocation	Heterozygous	P0_N2_treated_hermaphrodite	1417343	X	31	0	31	0	0	rep.4	58111353	2		31	x
144219	X	16659005	MantaBND:130:0:1:0:0:0:0	A	AA]I:5092572]	174	PASS	SVTYPE=BND;MATEID=MantaBND:130:0:1:0:0:0:1;SVINSLEN=1;SVINSSEQ=A;BND_DEPTH=59;MATE_BND_DEPTH=51	GT:FT:GQ:PL:PR:SR	0/1:PASS:174:224,0,920:30,4:54,7	Translocation	Heterozygous	P0_N2_treated_hermaphrodite	5092572	I	0	0	0	0	0	rep.4	58111353	2	A	0		CELE46A	LONGPAL3
144219	X	16884752	MantaBND:192:6:7:0:0:0:0	T	[II:6187764[T	858	PASS	SVTYPE=BND;MATEID=MantaBND:192:6:7:0:0:0:1;CIPOS=0,7;HOMLEN=7;HOMSEQ=CGGGATG;BND_DEPTH=139;MATE_BND_DEPTH=138	GT:FT:GQ:PL:PR:SR	0/1:PASS:496:908,0,493:21,3:32,29	Translocation	Heterozygous	P0_N2_treated_hermaphrodite	6187764	II	7	0	7	0	0	rep.4	58111353	4		7	x	(CGGGATGGAT)n	(TCCCGATCCA)n
144222	I	238534	MantaBND:15:0:1:0:0:0:1	G	G]V:10866801]	67	PASS	SVTYPE=BND;MATEID=MantaBND:15:0:1:0:0:0:0;IMPRECISE;CIPOS=-245,245;BND_DEPTH=93;MATE_BND_DEPTH=128	GT:FT:GQ:PL:PR	0/1:PASS:67:117,0,999:72,17	Translocation	Heterozygous	P0_N2_treated_hermaphrodite	10866801	V	0	-245	245	0	0	rep.5	47400677	2		245	x
144222	I	1059751	MantaINS:36:3:3:1:3:0	G	<INS>	999	PASS	END=1059751;SVTYPE=INS;CIPOS=0,11;CIEND=0,11;HOMLEN=11;HOMSEQ=GAAATGGGCGG;LEFT_SVINSSEQ=GAAATGGGCGGAGTTTTGGAGTACAAAAGCCCCGCCCATTTCTGACTAGGATTCGGGGAAATTGCTTTAAAACACGCCTATGGTACCATAGTGATCGAATTTCATAATAAAAAATTTTTAAAAAATTGTCTAAATTTTATATGATTTTTTGAAAATTGGAAAAATCTCAGTTTTCCCCCCTAATTCCTATTTTAATTACCGCCAATTGGATT;RIGHT_SVINSSEQ=TCACTATGGTACCATAGGCGTGTTTTAAAGCAATTTCCCCCCGAATCCTAGTCA	GT:FT:GQ:PL:PR:SR	1/1:PASS:156:999,159,0:0,5:0,52	Insertion	Homozygous	P0_N2_treated_hermaphrodite	1059751	I	11	0	11	0	11	rep.5	47400677			11
144222	I	2295502	MantaBND:69:0:1:0:0:0:1	A	[V:1772204[A	637	PASS	SVTYPE=BND;MATEID=MantaBND:69:0:1:0:0:0:0;CIPOS=0,27;HOMLEN=27;HOMSEQ=AAGCCGAATAATTATTAGAGCGCGCTT;BND_DEPTH=82;MATE_BND_DEPTH=49	GT:FT:GQ:PL:PR:SR	0/1:PASS:492:687,0,489:16,5:31,16	Translocation	Heterozygous	P0_N2_treated_hermaphrodite	1772204	V	27	0	27	0	0	rep.5	47400677	4		27		CELE14A	PALTTAA1_CE
144222	I	2652464	MantaBND:75:0:1:0:0:0:0	A	A[X:466044[	999	PASS	SVTYPE=BND;MATEID=MantaBND:75:0:1:0:0:0:1;CIPOS=0,4;HOMLEN=4;HOMSEQ=GTGG;BND_DEPTH=45;MATE_BND_DEPTH=123	GT:FT:GQ:PL:PR:SR	0/1:PASS:321:999,0,318:0,8:42,27	Translocation	Heterozygous	P0_N2_treated_hermaphrodite	466044	X	4	0	4	0	0	rep.5	47400677	1		4	x
144222	I	2893748	MantaINS:79:0:0:0:2:0	T	<INS>	999	PASS	END=2893748;SVTYPE=INS;CIPOS=0,8;CIEND=0,8;HOMLEN=8;HOMSEQ=AAATGGGA;LEFT_SVINSSEQ=AAATGGGAAGTAGAGTTTGTGGGTATTTTGCTTAAATAGACTAAAACTGGTCCAAAACCACCGAATTTCATAATGAGACTTCACAAAAAATTTCCAAAAATTTTTTATGGCGGGTCAAAATTTCGAAAAAAAAAGAGTTAAATTTTGCTAAAATCTGAAATTTCGCACACTTTTCTTTGTCACAGCCCCTGGATTTTAGTTTTTCTGAAATTATCATCCATTAAT;RIGHT_SVINSSEQ=GCCTAAAAGTTGTCTCAATCAGCGAATTTCCGCGAGATAAATTACCAAAATAAGGATTAATGGTTGATAATTTCAG…	GT:FT:GQ:PL:PR:SR	1/1:PASS:178:999,181,0:0,15:0,54	Insertion	Homozygous	P0_N2_treated_hermaphrodite	2893748	I	8	0	8	0	8	rep.5	47400677			8
144222	I	4548873	MantaBND:50:176:179:0:0:0:1	A	]IV:6470036]A	129	PASS	SVTYPE=BND;MATEID=MantaBND:50:176:179:0:0:0:0;IMPRECISE;CIPOS=-206,207;BND_DEPTH=88;MATE_BND_DEPTH=53	GT:FT:GQ:PL:PR	0/1:PASS:129:179,0,367:26,15	Translocation	Heterozygous	P0_N2_treated_hermaphrodite	6470036	IV	0	-206	207	0	0	rep.5	47400677	3		207	x	(TTTTTA)n
144222	I	4548889	MantaINS:50:176:176:1:1:0	G	GAATATATTCCAAAATATATTCCAGAATATATTCCAGAATATACTCCAAAATATATTCCAGAGTATATTCCAGAATATATTCCAGAATTTATTCCAGAATATATTCCAGAATATATTCCAAAATATATTTCAGAATATATTCCAAAATATATTCCAGAATTTATTTCAGAATATATTCCAGAATATATTCCAGAATATATTCCAGAATATATTCCAA	610	PASS	END=4548889;SVTYPE=INS;SVLEN=216;CIGAR=1M216I;CIPOS=0,42;HOMLEN=42;HOMSEQ=AATATATTCCAAAATATATTCCAGAATATATTCCAGAATATA	GT:FT:GQ:PL:PR:SR	1/1:PASS:45:663,48,0:1,0:0,35	Insertion	Homozygous	P0_N2_treated_hermaphrodite	4548889	I	42	0	42	0	0	rep.5	47400677			42
144222	I	6521294	MantaINS:155:0:0:0:0:0	A	AGATCGAAACAATTATTGGAAATGTATTAAATGAAATGAAATCAGAATTGCATTTAGGGGGTAGTAGTCGCATCTTTAGTCAGATTATTCAGATATAGTATGAAGTTTTTAGATAATAAATCAATTCTTTCAGACGTTTCTTGTGGAGTGGGCATCATTTATTTTGGCCAAAACGTTTTCTCACTCACACGAAAGAATAGGAACAAACTGTGCAAATCCAATAGATTCTTGTT	999	PASS	END=6521294;SVTYPE=INS;SVLEN=232;CIGAR=1M232I;CIPOS=0,5;HOMLEN=5;HOMSEQ=GATCG	GT:FT:GQ:PL:PR:SR	1/1:PASS:169:999,172,0:0,2:0,72	Insertion	Homozygous	P0_N2_treated_hermaphrodite	6521294	I	5	0	5	0	0	rep.5	47400677			5
144222	I	10950413	MantaDEL:240:0:0:207:0:0	TAATAGCACCAATTTAGCTCCAATGAAGCACCAAATAGCACCGATGTAGCACCA	T	37	PASS	END=10950466;SVTYPE=DEL;SVLEN=-53;CIGAR=1M53D;CIPOS=0,15;HOMLEN=15;HOMSEQ=AATAGCACCAATTTA	GT:FT:GQ:PL:PR:SR	0/1:PASS:37:87,0,280:2,0:50,6	Deletion	Heterozygous	P0_N2_treated_hermaphrodite	10950466	I	15	0	15	0	0	rep.5	47400677			15
144222	I	11175582	MantaINS:247:0:0:0:3:0	C	<INS>	999	PASS	END=11175582;SVTYPE=INS;CIPOS=0,6;CIEND=0,6;HOMLEN=6;HOMSEQ=CTCGTG;LEFT_SVINSSEQ=CTCGTGGATTACACGAGCACTGCGTAAATCGACACATGACTAATATTGGGCTTTTCCAATTTAAATCGACTATTTTAAGCTAAAAGTTGCTTGATTTTTAAGAAAAAAAAAGAAGAATTTATGTTAAAAACTACAAATGACCGAATATCATGAAAAAAATTTAAAAAAATATTCTAGATTTTATATGATGTTTTGA;RIGHT_SVINSSEQ=CAGCAAGCGCGCTCTACCGAACGAATCAATTGGCGGAATTTCAAATGTAATTAGATGAAAACTGAGATTTTTCCAATTTTCAAAAAATCATATAAAATCTAGAATA…	GT:FT:GQ:PL:PR:SR	1/1:PASS:98:999,101,0:0,2:0,37	Insertion	Homozygous	P0_N2_treated_hermaphrodite	11175582	I	6	0	6	0	6	rep.5	47400677			6
144222	I	11511678	MantaBND:79:1:7:0:0:0:1	T	T]IV:17326113]	40	PASS	SVTYPE=BND;MATEID=MantaBND:79:1:7:0:0:0:0;IMPRECISE;CIPOS=-143,144;BND_DEPTH=60;MATE_BND_DEPTH=36	GT:FT:GQ:PL:PR	0/1:PASS:40:90,0,228:16,8	Translocation	Heterozygous	P0_N2_treated_hermaphrodite	17326113	IV	0	-143	144	0	0	rep.5	47400677	2		144	x	HAT3_CE	PALTTAA3_CE
144222	I	12738722	MantaINS:285:0:0:0:0:0	A	AATCCTTATGATCCTCATCTGGGTAGCCTAGGATAAACATCGGAACGGGAGGATCTGCTTCAAAGATCTTTGGGATCCTCGGCCATACCACTTGAGCTATGAATCTTCAGAAAGATCTGTAGGATCCAGGGGCTACGATCTTCATGGCAAGCTAGGATCCTGAACTAGGTCACTCCCGCTCCTCCAGAATTTTCACTAGGAAAACCAGGTTCCGAAGATCCGTGGAATCTTATGAAGCTGCTCTTCAATCTCTTCAATCAGTATGGGTGATGCTGATGCTGAAGATCTGATAATTGACAGAGG	999	PASS	END=12738722;SVTYPE=INS;SVLEN=302;CIGAR=1M302I;CIPOS=0,19;HOMLEN=19;HOMSEQ=ATCCTTATGATCCTCATCT	GT:FT:GQ:PL:PR:SR	1/1:PASS:104:999,107,0:1,1:0,48	Insertion	Homozygous	P0_N2_treated_hermaphrodite	12738722	I	19	0	19	0	0	rep.5	47400677			19
144222	I	14340151	MantaBND:128:7:8:0:0:0:1	C	[V:4248555[C	999	PASS	SVTYPE=BND;MATEID=MantaBND:128:7:8:0:0:0:0;CIPOS=0,1;HOMLEN=1;HOMSEQ=G;BND_DEPTH=36;MATE_BND_DEPTH=48	GT:FT:GQ:PL:PR:SR	0/1:PASS:16:999,0,13:3,5:6,26	Translocation	Heterozygous	P0_N2_treated_hermaphrodite	4248555	V	1	0	1	0	0	rep.5	47400677	4		1	x
144222	I	14340289	MantaBND:128:8:9:0:0:0:1	C	C]V:4248552]	671	PASS	SVTYPE=BND;MATEID=MantaBND:128:8:9:0:0:0:0;CIPOS=0,7;HOMLEN=7;HOMSEQ=GCAGTGC;BND_DEPTH=27;MATE_BND_DEPTH=50	GT:FT:GQ:PL:PR:SR	0/1:PASS:133:721,0,130:6,3:11,16	Translocation	Heterozygous	P0_N2_treated_hermaphrodite	4248552	V	7	0	7	0	0	rep.5	47400677	2		7	x
144222	I	14425428	MantaDEL:324:0:0:0:0:0	CAGCAATTTTGCCTAATTTAGACTACAAACTACAGTTATTTGCAATTTGGCACAGTCTGTCTTGATTACTATAATGCAGTAGCAGTAGTCGAAATTTCAAAAAAAATCGCCAAATTCGAATTCAATTTTCTGAGAAAATTCTAATTTTCCTGTTAGATATGTTTTGGGCTCTGCTGATCTGTTGGAAAATGCAAAAAATTCGGTGAAAATCTGTTGAAAACTAGGAATTTAGACTAAATTGACGATTGGTTGAGGCTATCGGACTACAAAC	CTATATTTGGAGCTA	999	PASS	END=14425698;SVTYPE=DEL;SVLEN=-270;CIGAR=1M14I270D	GT:FT:GQ:PL:PR:SR	1/1:PASS:104:999,107,0:0,11:0,39	Deletion	Homozygous	P0_N2_treated_hermaphrodite	14425698	I	0	0	0	0	0	rep.5	47400677			0
144222	II	1450598	MantaBND:362:4:5:0:0:0:1	T	T]II:1455928]	76	PASS	SVTYPE=BND;MATEID=MantaBND:362:4:5:0:0:0:0;IMPRECISE;CIPOS=-194,194;BND_DEPTH=93;MATE_BND_DEPTH=113	GT:FT:GQ:PL:PR	0/1:PASS:76:126,0,337:23,9	Translocation	Heterozygous	P0_N2_treated_hermaphrodite	1455928	II	0	-194	194	0	0	rep.5	47400677	2		194	x
144222	II	1454792	MantaDEL:362:3:3:0:0:0	CCGGTTCTATTTTTTCCGTGAGTAGATTTTTCCGCCGGTTCAATTATTCCGCCGGTTCGAGTTTTTCCGCAGATAGATTTTTTCCGCCGGTTCAATTTTTTCCGCCGGTTCTATTTTTTCCGTGAGTAGATTTTTCCGCCGGTTCAATTATTCCGCCGGTTCGAGTTTTTCCGCAGATAGATTTTTTCCGCCGGTTCAATTTTTCCGCCGGTTCG	CAGATAT	569	PASS	END=1455006;SVTYPE=DEL;SVLEN=-214;CIGAR=1M6I214D	GT:FT:GQ:PL:PR:SR	0/1:PASS:568:619,0,571:6,6:57,22	Deletion	Heterozygous	P0_N2_treated_hermaphrodite	1455006	II	0	0	0	0	0	rep.5	47400677			0
144222	II	1455374	MantaBND:362:5:6:2:0:0:0	C	CGAAA]II:1456629]	763	PASS	SVTYPE=BND;MATEID=MantaBND:362:5:6:2:0:0:1;SVINSLEN=4;SVINSSEQ=GAAA;BND_DEPTH=86;MATE_BND_DEPTH=124	GT:FT:GQ:PL:PR:SR	0/1:PASS:763:813,0,999:45,3:90,28	Translocation	Heterozygous	P0_N2_treated_hermaphrodite	1456629	II	0	0	0	0	0	rep.5	47400677	2	GAAA	0
144222	II	1455928	MantaBND:362:4:5:0:0:0:0	A	A]II:1450598]	76	PASS	SVTYPE=BND;MATEID=MantaBND:362:4:5:0:0:0:1;IMPRECISE;CIPOS=-189,190;BND_DEPTH=113;MATE_BND_DEPTH=93	GT:FT:GQ:PL:PR	0/1:PASS:76:126,0,337:23,9	Translocation	Heterozygous	P0_N2_treated_hermaphrodite	1450598	II	0	-189	190	0	0	rep.5	47400677	2		190	x
144222	II	1456629	MantaBND:362:5:6:2:0:0:1	A	ATTTC]II:1455374]	763	PASS	SVTYPE=BND;MATEID=MantaBND:362:5:6:2:0:0:0;SVINSLEN=4;SVINSSEQ=TTTC;BND_DEPTH=124;MATE_BND_DEPTH=86	GT:FT:GQ:PL:PR:SR	0/1:PASS:763:813,0,999:45,3:90,28	Translocation	Heterozygous	P0_N2_treated_hermaphrodite	1455374	II	0	0	0	0	0	rep.5	47400677	2	TTTC	0
144222	II	2141116	MantaBND:382:0:1:0:0:0:1	A	A[V:686153[	829	PASS	SVTYPE=BND;MATEID=MantaBND:382:0:1:0:0:0:0;CIPOS=0,12;HOMLEN=12;HOMSEQ=TTAACAAGGAAA;BND_DEPTH=68;MATE_BND_DEPTH=81	GT:FT:GQ:PL:PR:SR	0/1:PASS:319:879,0,316:18,5:22,23	Translocation	Heterozygous	P0_N2_treated_hermaphrodite	686153	V	12	0	12	0	0	rep.5	47400677	1		12	x
144222	II	2818716	MantaINS:409:0:0:0:0:0	A	AGCGCTCAAAGATTGGGCGCGAGAGAGCGCGGGGAAGGGGAGACGCAGAGCGCCTCGCGCGCCTGCGTCTCCCCTTCCACCGCACTCTCTC	737	PASS	END=2818716;SVTYPE=INS;SVLEN=90;CIGAR=1M90I;CIPOS=0,4;HOMLEN=4;HOMSEQ=GCGC	GT:FT:GQ:PL:PR:SR	1/1:PASS:54:790,57,0:0,0:0,27	Insertion	Homozygous	P0_N2_treated_hermaphrodite	2818716	II	4	0	4	0	0	rep.5	47400677			4
144222	II	3159567	MantaDEL:423:0:1:0:0:0	T	<DEL>	85	PASS	END=3163371;SVTYPE=DEL;SVLEN=-3804;IMPRECISE;CIPOS=-114,115;CIEND=-53,54	GT:FT:GQ:PL:PR	0/1:PASS:85:135,0,291:20,9	Deletion	Heterozygous	P0_N2_treated_hermaphrodite	3163371	II	0	-114	115	-53	54	rep.5	47400677			115
144222	II	3833797	MantaINS:448:0:0:1:0:1	ACG	ATGGCTAGTTTAGGGGTGACAGGCAAACGATTTTTTCCGGCAAATCAGCAAACCGGCAATTTGCCGAATTTGCCGGAAAAAACTCAATTGCCGTCCACTCCTGTGATAGTGGATGGTTGT	999	PASS	END=3833799;SVTYPE=INS;SVLEN=119;CIGAR=1M119I2D	GT:FT:GQ:PL:PR:SR	0/1:PASS:466:999,0,463:4,6:34,43	Insertion	Heterozygous	P0_N2_treated_hermaphrodite	3833799	II	0	0	0	0	0	rep.5	47400677			0
144222	II	3834811	MantaDEL:453:0:0:0:0:0	TGCATAAATGGGCATAAATGGGCCAATGAAAAGCATAAATGGGCCAATGAAT	TAAGATATAG	999	PASS	END=3834862;SVTYPE=DEL;SVLEN=-51;CIGAR=1M9I51D	GT:FT:GQ:PL:PR:SR	0/1:PASS:725:999,0,722:14,0:56,48	Deletion	Heterozygous	P0_N2_treated_hermaphrodite	3834862	II	0	0	0	0	0	rep.5	47400677			0
144222	II	6163864	MantaDEL:491:0:2:1:1:0	G	<DEL>	142	PASS	END=6166863;SVTYPE=DEL;SVLEN=-2999;CIPOS=0,2;CIEND=0,2;HOMLEN=2;HOMSEQ=TC	GT:FT:GQ:PL:PR:SR	0/1:PASS:142:192,0,785:24,7:55,25	Deletion	Heterozygous	P0_N2_treated_hermaphrodite	6166863	II	2	0	2	0	2	rep.5	47400677			2
144222	II	6630113	MantaDUP:TANDEM:501:0:1:0:0:0	C	<DUP:TANDEM>	999	PASS	END=6630883;SVTYPE=DUP;SVLEN=770	GT:FT:GQ:PL:PR:SR	0/1:PASS:999:999,0,999:42,26:80,27	Tandem Duplication	Heterozygous	P0_N2_treated_hermaphrodite	6630883	II	0	0	0	0	0	rep.5	47400677			0
144222	II	6669184	MantaINS:499:0:0:0:3:0	T	<INS>	999	PASS	END=6669184;SVTYPE=INS;CIPOS=0,6;CIEND=0,6;HOMLEN=6;HOMSEQ=CATTTC;LEFT_SVINSSEQ=CATTTCCGATGCATTTAATATTATTCCGAATAATACCAGAGTTGGACCACCAGGATTTGTTATCCTGATTGCAAATTCGTGAGTGTTCGCCATGATCACTGTTTCAGAAATTCAATTTTCAGCGCTGATTCGGTTCCAACTTCTGTGAATTCCGCTGTGAATTTGAAAGCTCAAGGGT;RIGHT_SVINSSEQ=CACTTGTCCCATTCCCTACTGGAAACACACTTGAGCCACTAATGACATACGGAGCTGCAACGACATCAGACAGAATAACTGCTGCTTTTTCTGTTTTTGCTAACTTTGCAAAAGAACCAGCTAC	GT:FT:GQ:PL:PR:SR	1/1:PASS:184:999,187,0:0,2:0,72	Insertion	Homozygous	P0_N2_treated_hermaphrodite	6669184	II	6	0	6	0	6	rep.5	47400677			6
144222	II	7801507	MantaDEL:523:0:0:0:0:0	ATAAGACAATGCCAAAGTGATAACTTTCCTGAAGGCACATTTACTTCGCCTAATTTTTGATTTTTAAAACAAATAAATATTTACATTTTCTAATATTGATC	A	294	PASS	END=7801607;SVTYPE=DEL;SVLEN=-100;CIGAR=1M100D;CIPOS=0,100;HOMLEN=100;HOMSEQ=TAAGACAATGCCAAAGTGATAACTTTCCTGAAGGCACATTTACTTCGCCTAATTTTTGATTTTTAAAACAAATAAATATTTACATTTTCTAATATTGATC	GT:FT:GQ:PL:PR:SR	1/1:PASS:18:347,21,0:0,0:0,7	Deletion	Homozygous	P0_N2_treated_hermaphrodite	7801607	II	100	0	100	0	0	rep.5	47400677			100
[truncated: 5,046 more rows]

## Sheet: Filtered_SV
File_ID	chr	pos	id	ref	alt	quality	filter	info	format	sample1	Type	Zygosity	Treatment	end_pos	end_chr	HOMLEN	Start_Pos_CI_Start	Start_Pos_CI_End	End_Pos_CI_Start	End_Pos_CI_End	Rep	Mapped_Reads	Translocation_Type	Insert	Max_CI	BackgroundMutation	StartPos_Repeat	EndPos_Repeat	Generation	Strain	Treated	Sex	Parent	Replicate
[truncated: 425 more rows]
