# Supplementary material for: Inheritance of paternal DNA damage by histone-mediated repair restriction
Source: Nature. 2022 Dec 21;613(7943):365–74. doi: 10.1038/s41586-022-05544-w (PMC9834056; doi:10.1038/s41586-022-05544-w)
Supplement: Supplementary file 5 — The results of the proteomic GSEA for chromosomal enrichment. [file 41586_2022_5544_MOESM5_ESM.xlsx]

## Sheet: Proteomics_GSEA_20kPermutations
Proteomics GSEA with 20000 Permutations
Chromosome	setSize	enrichmentScore	NES	pvalue	p.adjust	qvalues	rank	leading_edge	core_enrichment
X	291	0.432792	1.96113	6.74673e-05	0.000404804	0.000355091	515	tags=33%, list=19%, signal=30%	WBGene00016088/WBGene00001854/WBGene00000503/WBGene00006366/WBGene00012255/WBGene00001898/WBGene00008605/WBGene00020921/WBGene00000039/WBGene00006649/WBGene00002051/WBGene00012261/WBGene00004987/WBGene00019730/WBGene00001006/WBGene00017340/WBGene00020509/WBGene00010199/WBGene00006063/WBGene00000149/WBGene00008572/WBGene00002253/WBGene00019867/WBGene00000482/WBGene00006816/WBGene00003239/WBGene000…
IV	440	0.234237	1.10042	0.212269	0.636808	0.558603	289	tags=14%, list=11%, signal=15%	WBGene00010234/WBGene00000301/WBGene00001730/WBGene00001853/WBGene00009895/WBGene00000535/WBGene00001477/WBGene00000120/WBGene00012878/WBGene00017071/WBGene00044737/WBGene00010440/WBGene00016636/WBGene00017990/WBGene00009926/WBGene00019947/WBGene00001931/WBGene00002012/WBGene00003568/WBGene00015553/WBGene00016638/WBGene00017482/WBGene00012435/WBGene00000370/WBGene00001085/WBGene00001390/WBGene000…
V	441	-0.196058	-1.01775	0.395201	0.790402	0.693335	535	tags=23%, list=20%, signal=22%	WBGene00003982/WBGene00012615/WBGene00022644/WBGene00022646/WBGene00020717/WBGene00009092/WBGene00017261/WBGene00003079/WBGene00016509/WBGene00000987/WBGene00014123/WBGene00011897/WBGene00008452/WBGene00004499/WBGene00020999/WBGene00006567/WBGene00010470/WBGene00020269/WBGene00017431/WBGene00016508/WBGene00010627/WBGene00001233/WBGene00007073/WBGene00020391/WBGene00002061/WBGene00004754/WBGene000…
II	446	-0.183352	-0.952734	0.663671	0.995506	0.873251	547	tags=23%, list=20%, signal=22%	WBGene00018475/WBGene00008459/WBGene00017245/WBGene00006617/WBGene00015920/WBGene00017440/WBGene00011526/WBGene00007555/WBGene00001775/WBGene00002066/WBGene00010015/WBGene00017968/WBGene00007413/WBGene00007564/WBGene00011511/WBGene00000377/WBGene00015185/WBGene00001229/WBGene00011759/WBGene00001225/WBGene00006626/WBGene00019061/WBGene00016415/WBGene00006915/WBGene00015941/WBGene00004208/WBGene000…
I	512	-0.155431	-0.816887	0.992029	0.995909	0.873605	625	tags=23%, list=23%, signal=22%	WBGene00007001/WBGene00009052/WBGene00000639/WBGene00001039/WBGene00000150/WBGene00009342/WBGene00018866/WBGene00020037/WBGene00001843/WBGene00001819/WBGene00001030/WBGene00003951/WBGene00001231/WBGene00007712/WBGene00007533/WBGene00007708/WBGene00002258/WBGene00004412/WBGene00022159/WBGene00001814/WBGene00001816/WBGene00007975/WBGene00009126/WBGene00022373/WBGene00011064/WBGene00015092/WBGene000…
III	561	-0.154651	-0.81753	0.995909	0.995909	0.873605	774	tags=31%, list=29%, signal=28%	WBGene00011730/WBGene00022663/WBGene00001744/WBGene00001478/WBGene00023451/WBGene00001155/WBGene00003826/WBGene00003962/WBGene00004980/WBGene00009734/WBGene00010842/WBGene00004679/WBGene00010908/WBGene00006715/WBGene00017044/WBGene00022173/WBGene00016412/WBGene00013984/WBGene00000229/WBGene00022531/WBGene00002249/WBGene00001392/WBGene00007964/WBGene00011412/WBGene00015346/WBGene00000231/WBGene000…
